# Supplementary material for: Cnidarian microRNAs frequently regulate targets by cleavage
Source: HighWire-hosted journal article supplement (doi:10.1101/gr.162503.113), 2014-03-18

**Supplemental Figure S3.** Methylated and unmethylated spike-ins in *Nematostella* libraries. Unmethylated synthetic RNA spike-ins were lost in oxidized libraries, whereas methylated ones exhibited similar read numbers in oxidized and untreated libraries. Read counts in each library were normalized to library depth.

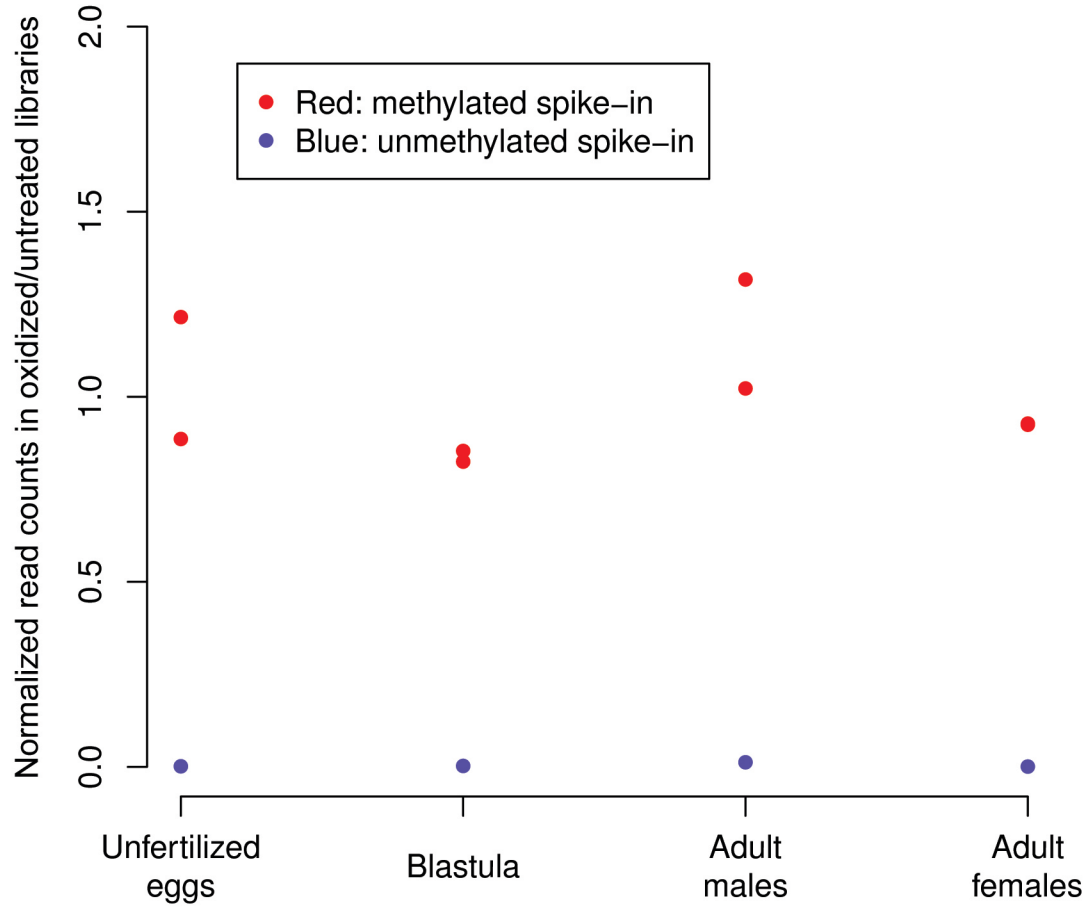

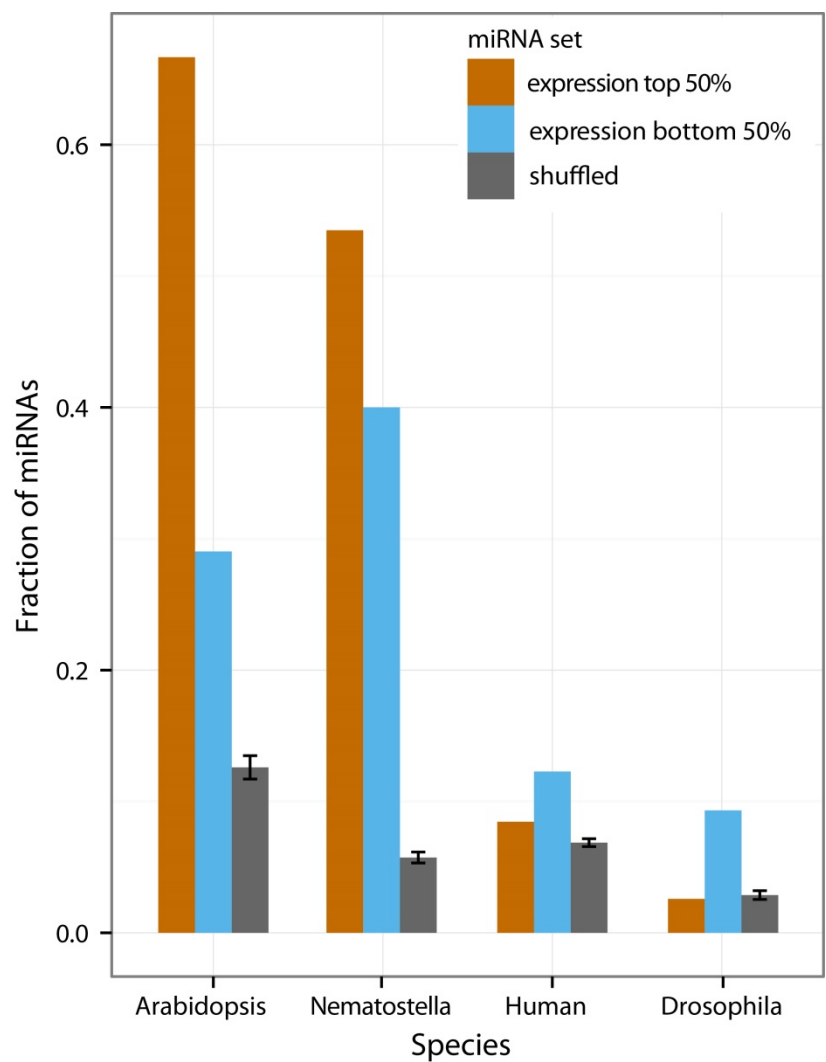

**Supplemental Figure S4.** The fraction of mRNA alignment mismatch scores lower than 2.5 for the 50% most expressed and 50% least expressed miRNAs of *Nematostella vectensis*, *Homo sapiens*, *Drosophila melanogaster* and *Arabidopsis thaliana*. The background noise levels are shown by matches of shuffled miRNAs.

**Supplemental Figure S5.** miR-2028 and the gene *NVE20913*, which is both the intronic host of the miRNA and its regulatory target, create an incoherent regulatory circuit.

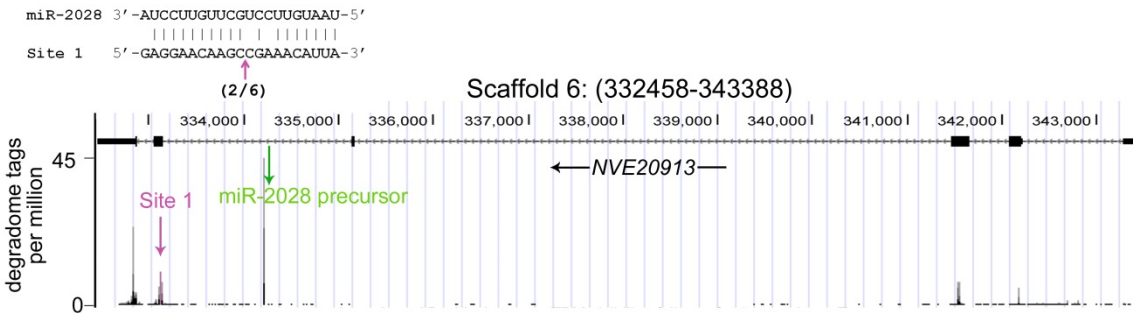

**Supplemental Figure S6.** Enrichment of observed cleavage sites among predicted sites. Predicted sites were required to exhibit a perfect match to a subsequence of the miRNA, with varying starting and ending positions for the perfectly-matched subsequence.

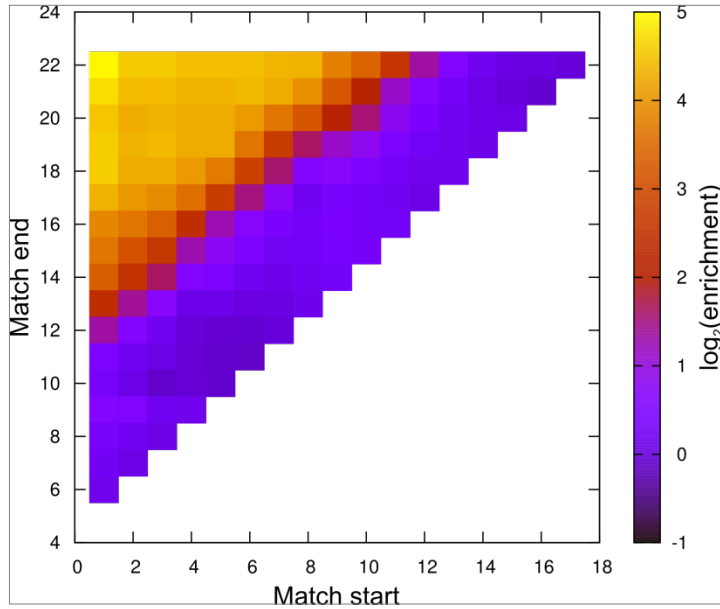

Supplement: Supplemental_Figures_S3-S6.pdf [file Supplemental_Figures_S3-S6.pdf]
