# Supplementary material for: Cnidarian microRNAs frequently regulate targets by cleavage
Source: HighWire-hosted journal article supplement (doi:10.1101/gr.162503.113), 2014-03-18
Supplement: Table_S1.xlsx [file Table_S1.xlsx]

## Sheet: Mature miRNAs
miRNA name	sequence of major isoform	Unfertilized eggs		Blastula		Gastrula		Early planula		Late planula		Metamorphosing		Primary polyps		Adult males		Adult female
		untreated (depth: 2613163)	oxidized (depth: 2498767)	untreated (depth: 2637518)	oxidized (depth: 2685304)	untreated (depth: 4497317)	oxidized (depth: 4504795)	untreated (depth: 4608287)	oxidized (depth: 4576031)	untreated (depth: 2417870)	oxidized (depth: 2719635)	untreated (depth: 2125638)	oxidized (depth: 2458096)	untreated (depth: 4173973)	oxidized (depth: 4232194)	untreated (depth: 2890922)	oxidized (depth: 2620395)	untreated (depth: 2745716)	oxidized (depth: 2937274)
miR-2022	TTTGCTAGTTGCTTTTGTCCCGC	0	3	6	4	15	13	2446	1283	621	1739	418	685	420	602	256	212	193	196
miR-2023	AAAGAAGTACAAGTGGTAGGG	20	86	291	218	12	21	190	72	41	129	336	521	45931	64096	14274	15615	10871	11455
miR-2024a	TTACACAGTACCGATATTGTGA	157	35	342	12	1230	11	12158	59	2531	119	5963	116	28459	507	10542	191	4942	75
miR-2026	TTTCAAATGTCTACTGATGGA	2	18	68	51	10	6	270	37	30	139	361	424	2181	2483	2161	2039	2959	2989
miR-2030	TAGCATAACATTGTAAGAGAT	10	1	9	1	22	6	176	59	49	97	92	89	196	164	177	59	150	79
miR-2024e	TTGCACATTACCAATATTCTGA	59	22	110	20	364	47	5192	575	1250	1038	2488	815	5803	1744	3968	691	3323	523
miR-2024g	TAACACAGTACCGATATTGTGA	47	14	96	3	564	14	2837	78	760	125	1472	115	5588	583	2295	189	978	65
miR-2025	TTTTTTAGCCCGCGGAAGTTGT	1	11	33	27	8	3	1438	138	69	771	888	1109	4790	5703	1256	1062	846	921
miR-2024f	TTGCACATCACCAATGTTCT	55	9	68	2	48	0	261	0	58	0	197	1	623	0	1702	0	1466	0
miR-2028	TAATGTTCCTGCTTGTTCCT	15	6	18	0	35	0	481	0	200	0	260	2	1216	20	642	6	579	4
miR-2029	TACGCAATCCCTAGGTTACCA	3	5	11	3	41	7	242	50	86	90	176	125	571	345	349	161	319	128
miR-2027	TGCTTGTTGGTAATTTTGCA	5	5	6	1	3	0	59	1	18	3	34	3	102	9	242	5	425	6
miR-100	ACCCGTAGATCCGAACTTGTG	3	3	18	12	1	2	6	1	5	3	2	4	12	12	601	560	542	482
miR-2036	TATATTGTACGACTCTCATCGTA	2	10	17	11	29	42	447	199	123	189	300	311	474	596	639	639	840	912
miR-9412	TGAATGCTAAAGACTGGAAGACA	58	74	62	52	258	305	443	334	182	255	217	238	339	356	71	78	89	123
miR-9413	TAAAAGTGATCAGTGGTAAGGT	0	0	10	5	0	0	0	0	0	0	2	6	0	1	335	370	1	1
miR-9414	AACTTGATCTTCAATGAACT	0	0	0	0	10	0	151	1	55	1	79	1	107	0	4	0	0	0
miR-9415	ATACTTACCTGACGCGGGAGGT	0	0	0	0	0	0	87	0	3	0	43	0	75	0	0	0	1	0
miR-9416	AAGAACACTACAAATTGTCGTG	0	0	11	0	0	0	0	0	0	0	1	0	0	0	227	92	0	1
miR-2037	TGTGATTGGAGACTTTTACCGT	0	2	1	1	0	2	21	9	1	11	20	24	83	64	257	138	156	117
miR-9417	TGAGAACGTATCGGCAGGGTCT	3	4	3	6	30	63	96	55	13	33	32	37	241	217	14	23	18	27
miR-9418	AAGTGCATCAATGGAACTGTTTC	10	16	13	17	41	46	87	61	37	65	52	91	103	120	26	31	39	51
miR-9419	TTCTTGAAGATGCTTGAATTTT	0	0	4	1	0	0	0	0	0	0	0	1	0	0	182	68	1	0
miR-9420	ATACAAATCAGCCGACTGGGA	3	0	3	2	0	3	4	2	4	3	2	2	9	4	1	3	0	0
miR-9421	TTGCGTATCTGCCATTAATGCT	0	0	4	3	0	0	0	0	0	0	1	1	0	0	167	89	1	0
miR-9422	TGACAGAAGATAGAAGCGCTGA	0	0	2	1	1	0	0	0	0	1	2	0	0	1	148	106	1	1
miR-2032b	TCGCTGCAACAGTTAGCTAG	0	0	0	0	0	0	1	0	0	0	1	0	0	0	5	3	2	0
miR-9423	ATGGTCCGTATGAAGAACTACTG	49	62	43	54	108	123	95	102	60	71	42	48	72	71	34	50	19	26
miR-2041b	TTAGAGGAAAATACCCCTGG	0	0	0	0	12	0	57	0	35	0	23	0	32	0	7	0	3	0
miR-9424a	TATAGTTGGCTCATCGAGGCAGT	0	0	2	2	0	0	0	0	0	0	5	3	1	0	119	102	0	0
miR-2042	TTATAAATCATCCTTGCACTAC	0	1	2	2	0	0	7	2	0	2	4	5	8	12	101	83	6	7
miR-9425	AAGAACACCCAAAATAGCTGA	0	0	1	0	0	0	2	1	0	2	6	3	38	49	62	52	45	51
miR-2038	ACCTTAATGTCACCATGATGA	0	1	2	2	0	0	4	0	1	1	2	1	8	5	71	34	70	42
miR-9426	AAGAGTTTGAGGGCTTTGAAAG	0	0	0	0	9	18	15	11	9	15	11	8	7	4	1	1	1	1
miR-9427	AGAGACCAGTGAGATTGAAGTGA	0	0	0	0	0	0	4	1	0	0	0	1	1	4	53	79	5	3
miR-2047	TTCGCCGAGCAGATGTCGG	0	0	0	0	0	0	3	0	1	0	1	0	1	0	1	0	0	0
miR-9428	CGAACATAGGGACACTGTT	0	0	0	0	0	0	1	0	1	0	3	0	4	0	4	0	5	0
miR-2043	TATATCGCCTTTTGAGGTTA	0	0	0	0	8	0	2	0	2	0	1	0	2	1	2	0	5	0
miR-2035	ACATGGTCTGTTACAAGGG	0	0	1	0	0	0	19	1	3	1	5	1	4	0	2	0	6	0
miR-9429	TTCGTCTATATGGAGAAAGG	0	0	1	0	0	0	0	0	0	0	0	0	0	0	20	7	0	0
miR-9430	TGGATTGTTATACGGTT	0	0	0	0	0	0	0	0	0	0	0	0	0	0	0	0	0	0
miR-9431	TAAGCTGTGGTTTAAAGCAC	0	0	0	0	1	0	1	0	0	0	0	0	3	0	9	0	5	0
miR-9424b	TAAAGCTGGTTTATCGAGGCA	0	0	0	0	0	0	0	0	0	0	1	0	0	0	8	2	0	0
miR-9432	GAATAACCGAAGGATTTGGAGG	0	2	3	1	5	8	1	6	2	1	0	2	0	0	0	0	0	0
miR-2045	TCCCAGAGTGTTGAGTTCA	0	0	0	0	1	0	0	0	1	0	0	0	0	0	6	0	1	0
miR-2050	ATTTGATTGCTGTGATCTGGTT	0	1	0	0	0	0	0	0	0	0	0	0	11	9	1	3	7	2
miR-2051	TACCGGAGTCTTTTCTGTGTC	0	0	0	0	0	0	0	0	0	0	0	0	1	0	0	0	0	0
miR-9433	TTCGGTGAAATTTAGAACCAC	0	0	0	0	0	0	1	0	1	0	0	0	1	0	1	0	2	0
miR-2034	GCTAATGCAAAAAATGTCAG	0	0	0	0	0	0	0	0	0	0	0	0	3	0	17	0	15	0
miR-9434	TCTGACAGGAATTCTGGCTTCTG	0	1	0	0	4	2	4	1	4	1	1	4	1	1	0	0	0	0
miR-9435	TCTTGTCAAGTGTATCTAGTGTG	0	0	0	0	0	0	0	0	0	0	0	1	0	0	25	11	0	0
miR-2032a	CGAGGTAACTGTTGCAGCAT	0	0	0	0	0	0	0	0	0	0	0	0	4	0	21	1	1	0
miR-9436	TTGACGCAAATGTTTGTATGT	0	0	0	0	0	0	0	0	0	0	0	0	1	0	7	1	5	1
miR-9437	TTAACGAGAATCTGATACGGTTC	0	0	0	2	3	4	10	5	0	2	1	1	0	0	0	2	2	1
miR-9438	ATACTACACAAGTGTCTCGATT	0	1	0	0	6	3	14	12	4	4	4	8	4	6	0	0	0	0
miR-9439	TTTAAGCACAGTGCTGGTCT	0	0	0	0	1	0	0	0	1	0	0	0	0	0	1	1	0	0
miR-9440	TAATCAACGAGAGTGTCAACCTG	5	4	5	1	1	4	1	2	1	1	1	0	1	0	3	1	6	2
miR-9441	GGCAAGATTACTCGGGGTGAG	0	0	0	0	0	0	0	0	0	0	0	0	0	0	0	0	0	0
miR-9442	AATATCAGGAGGACGCATTCG	0	0	2	0	0	0	0	0	0	0	0	0	0	0	20	18	0	0
miR-9443	AGCAGCCAGACAGGTTGG	0	0	0	0	0	0	0	0	0	0	0	0	0	0	0	0	0	0
miR-9444	TACGAACAACCGCCAACCCTCT	2	2	4	1	4	3	10	10	6	4	3	8	7	13	1	3	1	0
miR-9445	TCTGTGTCGCTCGTTTACTT	0	0	0	0	0	0	0	0	0	0	0	0	1	0	0	0	2	0
miR-9446	TTTTTTCTTATGTCGTCATGT	0	0	0	0	0	0	0	0	0	1	0	0	0	0	13	11	0	0
miR-9447	CGATTCACCTTCTTCAGTCTGC	1	0	1	0	2	1	0	0	2	1	0	0	0	0	0	0	0	0
miR-9448	TCCGCAGCCGTCCCTAGT	0	0	0	0	0	0	0	0	0	0	0	0	0	0	0	0	3	0
miR-9449	TATCTCCTTAAACATTCATCGT	0	0	0	1	0	0	1	0	0	0	0	0	1	1	15	6	3	1
miR-2039	ATAAAATAAAGGTAGGCT	0	1	1	0	0	0	1	0	0	1	0	0	0	0	0	0	9	0
miR-9450	AGATTCTTTAGAAATCAGTGGG	8	9	5	10	7	2	1	0	0	0	0	0	2	1	0	2	2	0
miR-9451	ACGAGTCTCAAATTGACAGGAA	0	1	0	0	2	0	3	1	0	2	0	0	0	0	0	0	0	0
miR-9452	TGCTAGATGAAGTTTGCAACAAA	1	0	2	1	1	5	1	0	1	0	0	1	0	5	0	0	1	0
miR-9453	GCGCTATTCCCAAACGGGA	0	1	0	0	0	0	0	0	0	0	0	0	0	0	9	0	1	0
miR-9454	TACCAGGTCACTGTTTTTGAGG	1	1	0	1	2	9	7	2	1	1	1	0	0	1	0	0	1	0
miR-9455	GTCCAGACCTGTGTGAATAGGG	0	0	0	0	0	0	0	0	0	0	0	0	0	0	5	11	0	0
miR-2031	TACGGCACTCTATTTATGGTA	0	0	0	0	1	0	1	2	1	0	0	0	0	0	2	0	1	0
miR-9456	CCGCTGACTCGCGAAATCCT	0	0	0	0	0	0	4	0	1	0	2	0	9	0	4	0	0	0
miR-9457	TACACATTCTAAGAAAAGTGCT	0	0	0	0	5	0	11	0	7	0	6	0	2	0	3	2	0	0
miR-9458	ACGCGAGCAAAGATGGAGAGGG	0	0	0	0	6	5	7	9	7	6	3	6	2	10	45	55	0	1
miR-9459	AAGGACTCAACGACCAAAGGAT	0	0	0	0	0	1	19	4	4	16	8	8	7	8	1	0	14	7
miR-9460	TACGCGTTGGTCGTGATTGA	19	52	23	33	138	85	36	52	59	14	4	6	30	22	2	5	8	12
miR-9461	CAGGATGACAGTGGCAAAACCA	1	0	3	2	3	7	9	13	11	7	3	5	5	9	1	2	1	4
miR-9462	TGACCTTGTACTCACCGAGGA	1	6	1	3	7	11	5	13	7	8	4	3	5	3	6	5	1	2
miR-9463	ACTGAATCTCAGAACTACAGTT	0	0	0	0	0	0	0	0	0	0	0	0	0	0	29	0	2	0
miR-9464	TCTGAGAAGATTTCGACAAGAAAC	0	0	5	1	2	1	3	5	2	2	3	3	5	4	13	14	16	8
miR-9465	TTGGATGGGAGGAATTTGAGAG	2	0	0	0	9	7	1	1	4	3	0	1	0	0	0	0	0	0
miR-9466	CAGTCGGTTACGTGAGTAGTCT	0	2	0	0	2	2	1	12	3	5	3	7	4	9	2	2	0	1
miR-9467	CATTTTCTTACACCGCCCTGGAG	3	1	5	3	3	1	1	1	0	1	0	0	0	0	1	2	1	0
miR-9468	GAAGTGTACATTGGTCGTGGAGG	0	0	1	0	0	0	10	4	2	5	2	2	4	11	0	2	0	0

## Sheet: extended hairpins
mature miRNA name	extended pre-miRNA hairpin	Unfertilized eggs		Blastula		Gastrula		Early planula		Late planula		Metamorphosing		Primary polyps		Adult males		Adult female
		untreated (depth: 2613163)	oxidized (depth: 2498767)	untreated (depth: 2637518)	oxidized (depth: 2685304)	untreated (depth: 4497317)	oxidized (depth: 4504795)	untreated (depth: 4608287)	oxidized (depth: 4576031)	untreated (depth: 2417870)	oxidized (depth: 2719635)	untreated (depth: 2125638)	oxidized (depth: 2458096)	untreated (depth: 4173973)	oxidized (depth: 4232194)	untreated (depth: 2890922)	oxidized (depth: 2620395)	untreated (depth: 2745716)	oxidized (depth: 2937274)
miR-2022	TGATCAAGATGAGTTCGCCTGAAAGTCGGGATGAGATCGCCTGAGAGTCGGGATAAGATCGCCTGAAAGTCGGGATAAATCAACTGTCAAGTGGTTGTCATTTGCTAGTTGCTTTTGTCCCGCCTTTTCTGCGAATTGATCACGTGATGTGACGTCATCACTGCCCAATTACAAATGCTGCAATATATTGAGGTACGTAAA	0	3	6	5	17	14	2654	1354	679	1895	450	752	456	650	276	222	210	205
miR-2022	CAGATAATCTCGGGATGAGTTCGCCTGAATGATCAAGATGAGTTCGCCTGAAAGTCGGGATGAGATCGCCTGAGAGTCGGGATAAGATCGCCTGAAAGTCGGGATAAATCAACTGTCAAGTGGTTGTCATTTGCTAGTTGCTTTTGTCCCGCCTTTTCTGCGAATTGATCACGTGATGTGACGTCATCACTGCCCAATTAC	0	3	6	5	17	14	2654	1354	679	1895	450	752	456	650	276	222	210	205
miR-2023	AATTGGGGAATGGGCTATAGAAGACGACGATTACTATCAAAATAGCTCAGTGGGCCAAGTACTGGAGACCAGACGAGAAGAGTTGCGTGACATACCTGTGTCTGCCACCTGTATTTCTATCACGTCAGATGAAAGAAGTACAAGTGGTAGGGAAGGGTGTGTCGATTGACAATGGCGGCTTATCAAGACACGACCAATGTT	22	107	323	240	13	21	210	75	44	142	373	538	47684	66110	15583	16843	12309	12535
miR-2023	ACTATCAAAATAGCTCAGTGGGCCAAGTACTGGAGACCAGACGAGAAGAGTTGCGTGACATACCTGTGTCTGCCACCTGTATTTCTATCACGTCAGATGAAAGAAGTACAAGTGGTAGGGAAGGGTGTGTCGATTGACAATGGCGGCTTATCAAGACACGACCAATGTTGTAAGGGAGGAGGTAGATATACAAGAATGCAG	22	107	323	240	13	21	210	75	44	142	373	538	47684	66110	15583	16843	12309	12535
miR-2023	ATTGGGGAATGGGCTATAGAAGACGACGATTACTATCAAAATAGCTCAGTGGGCCAAGTACTGGAGACCAGACGAGAAGAGTTGCGTGACATACCTGTGTCTGCCACCTGTATTTCTATCACGTCAGATGAAAGAAGTACAAGTGGTAGGGAAGGGTGTGTCGATTGACAATGGCGGCTTATCAAGACACGACCAATGTTG	22	107	323	240	13	21	210	75	44	142	373	538	47684	66110	15583	16843	12309	12535
miR-2023	CTATCAAAATAGCTCAGTGGGCCAAGTACTGGAGACCAGACGAGAAGAGTTGCGTGACATACCTGTGTCTGCCACCTGTATTTCTATCACGTCAGATGAAAGAAGTACAAGTGGTAGGGAAGGGTGTGTCGATTGACAATGGCGGCTTATCAAGACACGACCAATGTTGTAAGGGAGGAGGTAGATATACAAGAATGCAGC	22	107	323	240	13	21	210	75	44	142	373	538	47684	66110	15583	16843	12309	12535
miR-2023	TACTATCAAAATAGCTCAGTGGGCCAAGTACTGGAGACCAGACGAGAAGAGTTGCGTGACATACCTGTGTCTGCCACCTGTATTTCTATCACGTCAGATGAAAGAAGTACAAGTGGTAGGGAAGGGTGTGTCGATTGACAATGGCGGCTTATCAAGACACGACCAATGTTGTAAGGGAGGAGGTAGATATACAAGAATGCA	22	107	323	240	13	21	210	75	44	142	373	538	47684	66110	15583	16843	12309	12535
miR-2023	TTACTATCAAAATAGCTCAGTGGGCCAAGTACTGGAGACCAGACGAGAAGAGTTGCGTGACATACCTGTGTCTGCCACCTGTATTTCTATCACGTCAGATGAAAGAAGTACAAGTGGTAGGGAAGGGTGTGTCGATTGACAATGGCGGCTTATCAAGACACGACCAATGTTGTAAGGGAGGAGGTAGATATACAAGAATGC	22	107	323	240	13	21	210	75	44	142	373	538	47684	66110	15583	16843	12309	12535
miR-2024a	ACAAGCGCCGCAAGTGTACATGCGGACTTGTAACAAGAGCGATCGAGCACACGTGAGTCAGAATATTGCTTATGTTCTATAAGTATTCCTGGTAATTTTGAGGAGGCGATGTAACTCTACCAATAAGTGCTACTGCTTCAAAATATCGGTGTTGGGTAAAAGGTCACATTTTACACAGTACCGATATTGTGAAGCACGTTT	235	44	492	13	1629	18	14656	149	3183	286	7157	277	32069	1003	12933	209	6671	97
miR-2024a	ACAAGGGCCGCAAGTGTACATGCGGACTTGTAACAAGAGCGATCGAGCACACGTGAGTCAGAATATTGCTTATGTTCTATAAGTATTCCTGGTAATTTTGAGGAGGCGATGTAACTCTACCAACAAGTGCTACTGCTTCAAAATATCGGTGTTGGGTAAAAGGTCACATTTTACACAGTACCGATATTGTGAAGCACGTTT	235	44	492	13	1629	18	14655	149	3183	286	7157	277	32069	1003	12933	209	6671	97
miR-2024a	AGCGCCGCAAGTGTACATGCGGACTTGTAACAAGAGCGATCGAGCACACGTGAGTCAGAATATTGCTTATGTTCTATAAGTATTCCTGGTAATTTTGAGGAGGCGATGTAACTCTACCAATAAGTGCTACTGCTTCAAAATATCGGTGTTGGGTAAAAGGTCACATTTTACACAGTACCGATATTGTGAAGCACGTTTGCA	235	44	492	13	1629	18	14656	149	3183	286	7157	277	32069	1003	12933	209	6671	97
miR-2024a	AGGGCCGCAAGTGTACATGCGGACTTGTAACAAGAGCGATCGAGCACACGTGAGTCAGAATATTGCTTATGTTCTATAAGTATTCCTGGTAATTTTGAGGAGGCGATGTAACTCTACCAACAAGTGCTACTGCTTCAAAATATCGGTGTTGGGTAAAAGGTCACATTTTACACAGTACCGATATTGTGAAGCACGTTTGCT	235	44	492	13	1629	18	14655	149	3183	286	7157	277	32069	1003	12933	209	6671	97
miR-2024a	ATCGAGCACACGTGAGTCAGAATATTGCTTATGTTCTATAAGTATTCCTGGTAATTTTGAGGAGGCGATGTAACTCTACCAACAAGTGCTACTGCTTCAAAATATCGGTGTTGGGTAAAAGGTCACATTTTACACAGTACCGATATTGTGAAGCACGTTTGCTTAGGAACTAGGATACAACGAGGAGGCAAATTAAAGCTA	235	44	492	13	1629	18	14658	149	3183	286	7157	276	32069	1003	12931	209	6671	97
miR-2024a	ATCGAGCACACGTGAGTCAGAATATTGCTTATGTTCTATAAGTATTCCTGGTAATTTTGAGGAGGTGATGTAACTCTACCAACAAGTGCTACTGCTTCAAAATATCGGTGTTGGGTAAAAGGTCACATTTTACACAGTACCGATATTGTGAAGCACGTTTGCTTAGGAACTAGGATACAACGAGGAGGCAAATTAAAGCTA	235	44	492	13	1629	18	14658	149	3183	286	7157	276	32069	1003	12928	209	6671	97
miR-2024a	ATCGAGCACACGTGAGTCAGAATATTGCTTATGTTCTATAAGTATTCCTGGTAATTTTGAGGAGGCGATGTAACTCTACCAATAAGTGCTACTGCTTCAAAATATCGGTGTTGGGTAAAAGGTCACATTTTACACAGTACCGATATTGTGAAGCACGTTTGCAAATTAAAGCCACCAACAAGCGCTGTAACTCCACACGAA	235	44	492	13	1629	18	14656	149	3183	286	7157	276	32069	1003	12931	209	6671	97
miR-2024a	ATGTTCTATAAGTATTCCTGGTAATTTTGAGGAGGCGATGTAACTCTACCAACAAGTGCTACTGCTTCAAAATATCGGTGTTGGGTAAAAGGTCACATTTTACACAGTACCGATATTGTGAAGCACGTTTGCTTAGGAACTAGGATACAACGAGGAGGCAAATTAAAGCTACCAACAAGCGCTGTAACTCCACACGAAGAC	235	44	492	13	1629	18	14658	149	3183	286	7157	276	32069	1003	12931	209	6670	97
miR-2024a	ATGTTCTATAAGTATTCCTGGTAATTTTGAGGAGGTGATGTAACTCTACCAACAAGTGCTACTGCTTCAAAATATCGGTGTTGGGTAAAAGGTCACATTTTACACAGTACCGATATTGTGAAGCACGTTTGCTTAGGAACTAGGATACAACGAGGAGGCAAATTAAAGCTACCAACAAGCGCTGTAACTCCACACGAAGAC	235	44	492	13	1629	18	14658	149	3183	286	7157	276	32069	1003	12928	209	6670	97
miR-2024a	ATGTTCTATAAGTATTCCTGGTAATTTTGAGGAGGCGATGTAACTCTACCAATAAGTGCTACTGCTTCAAAATATCGGTGTTGGGTAAAAGGTCACATTTTACACAGTACCGATATTGTGAAGCACGTTTGCAAATTAAAGCCACCAACAAGCGCTGTAACTCCACACGAAGACAGGTAACGAGAGAAATCAAGCCGGTGT	235	44	492	13	1629	18	14656	149	3183	286	7157	276	32069	1003	12931	209	6670	97
miR-2024a	CGATCGAGCACACGTGAGTCAGAATATTGCTTATGTTCTATAAGTATTCCTGGTAATTTTGAGGAGGTGATGTAACTCTACCAACAAGTGCTACTGCTTCAAAATATCGGTGTTGGGTAAAAGGTCACATTTTACACAGTACCGATATTGTGAAGCACGTTTGCTTAGGAACTAGGATACAACGAGGAGGCAAATTAAAGC	235	44	492	13	1629	18	14658	149	3183	286	7157	276	32069	1003	12928	209	6671	97
miR-2024a	CGATCGAGCACACGTGAGTCAGAATATTGCTTATGTTCTATAAGTATTCCTGGTAATTTTGAGGAGGCGATGTAACTCTACCAATAAGTGCTACTGCTTCAAAATATCGGTGTTGGGTAAAAGGTCACATTTTACACAGTACCGATATTGTGAAGCACGTTTGCAAATTAAAGCCACCAACAAGCGCTGTAACTCCACACG	235	44	492	13	1629	18	14656	149	3183	286	7157	276	32069	1003	12931	209	6671	97
miR-2024a	CGATCGAGCACACGTGAGTCAGAATATTGCTTATGTTCTATAAGTATTCCTGGTAATTTTGAGGAGGCGATGTAACTCTACCAACAAGTGCTACTGCTTCAAAATATCGGTGTTGGGTAAAAGGTCACATTTTACACAGTACCGATATTGTGAAGCACGTTTGCTTAGGAACTAGGATACAACGAGGAGGCAAATTAAAGC	235	44	492	13	1629	18	14658	149	3183	286	7157	276	32069	1003	12931	209	6671	97
miR-2024a	CTTATGTTCTATAAGTATTCCTGGTAATTTTGAGGAGGTGATGTAACTCTACCAACAAGTGCTACTGCTTCAAAATATCGGTGTTGGGTAAAAGGTCACATTTTACACAGTACCGATATTGTGAAGCACGTTTGCTTAGGAACTAGGATACAACGAGGAGGCAAATTAAAGCTACCAACAAGCGCTGTAACTCCACACGAA	235	44	492	13	1629	18	14658	149	3183	286	7157	276	32069	1003	12928	209	6670	97
miR-2024a	CTTATGTTCTATAAGTATTCCTGGTAATTTTGAGGAGGCGATGTAACTCTACCAATAAGTGCTACTGCTTCAAAATATCGGTGTTGGGTAAAAGGTCACATTTTACACAGTACCGATATTGTGAAGCACGTTTGCAAATTAAAGCCACCAACAAGCGCTGTAACTCCACACGAAGACAGGTAACGAGAGAAATCAAGCCGG	235	44	492	13	1629	18	14656	149	3183	286	7157	276	32069	1003	12931	209	6670	97
miR-2024a	CTTATGTTCTATAAGTATTCCTGGTAATTTTGAGGAGGCGATGTAACTCTACCAACAAGTGCTACTGCTTCAAAATATCGGTGTTGGGTAAAAGGTCACATTTTACACAGTACCGATATTGTGAAGCACGTTTGCTTAGGAACTAGGATACAACGAGGAGGCAAATTAAAGCTACCAACAAGCGCTGTAACTCCACACGAA	235	44	492	13	1629	18	14658	149	3183	286	7157	276	32069	1003	12931	209	6670	97
miR-2024a	GATCGAGCACACGTGAGTCAGAATATTGCTTATGTTCTATAAGTATTCCTGGTAATTTTGAGGAGGCGATGTAACTCTACCAACAAGTGCTACTGCTTCAAAATATCGGTGTTGGGTAAAAGGTCACATTTTACACAGTACCGATATTGTGAAGCACGTTTGCTTAGGAACTAGGATACAACGAGGAGGCAAATTAAAGCT	235	44	492	13	1629	18	14658	149	3183	286	7157	276	32069	1003	12931	209	6671	97
miR-2024a	GATCGAGCACACGTGAGTCAGAATATTGCTTATGTTCTATAAGTATTCCTGGTAATTTTGAGGAGGCGATGTAACTCTACCAATAAGTGCTACTGCTTCAAAATATCGGTGTTGGGTAAAAGGTCACATTTTACACAGTACCGATATTGTGAAGCACGTTTGCAAATTAAAGCCACCAACAAGCGCTGTAACTCCACACGA	235	44	492	13	1629	18	14656	149	3183	286	7157	276	32069	1003	12931	209	6671	97
miR-2024a	GATCGAGCACACGTGAGTCAGAATATTGCTTATGTTCTATAAGTATTCCTGGTAATTTTGAGGAGGTGATGTAACTCTACCAACAAGTGCTACTGCTTCAAAATATCGGTGTTGGGTAAAAGGTCACATTTTACACAGTACCGATATTGTGAAGCACGTTTGCTTAGGAACTAGGATACAACGAGGAGGCAAATTAAAGCT	235	44	492	13	1629	18	14658	149	3183	286	7157	276	32069	1003	12928	209	6671	97
miR-2024a	TACATGCGGACTTGTAACAAGAGCGATCGAGCACACGTGAGTCAGAATATTGCTTATGTTCTATAAGTATTCCTGGTAATTTTGAGGAGGCGATGTAACTCTACCAATAAGTGCTACTGCTTCAAAATATCGGTGTTGGGTAAAAGGTCACATTTTACACAGTACCGATATTGTGAAGCACGTTTGCAAATTAAAGCCACC	235	44	492	13	1629	18	14656	149	3183	286	7157	277	32069	1003	12932	209	6671	97
miR-2024a	TATGTTCTATAAGTATTCCTGGTAATTTTGAGGAGGCGATGTAACTCTACCAATAAGTGCTACTGCTTCAAAATATCGGTGTTGGGTAAAAGGTCACATTTTACACAGTACCGATATTGTGAAGCACGTTTGCAAATTAAAGCCACCAACAAGCGCTGTAACTCCACACGAAGACAGGTAACGAGAGAAATCAAGCCGGTG	235	44	492	13	1629	18	14656	149	3183	286	7157	276	32069	1003	12931	209	6670	97
miR-2024a	TATGTTCTATAAGTATTCCTGGTAATTTTGAGGAGGTGATGTAACTCTACCAACAAGTGCTACTGCTTCAAAATATCGGTGTTGGGTAAAAGGTCACATTTTACACAGTACCGATATTGTGAAGCACGTTTGCTTAGGAACTAGGATACAACGAGGAGGCAAATTAAAGCTACCAACAAGCGCTGTAACTCCACACGAAGA	235	44	492	13	1629	18	14658	149	3183	286	7157	276	32069	1003	12928	209	6670	97
miR-2024a	TATGTTCTATAAGTATTCCTGGTAATTTTGAGGAGGCGATGTAACTCTACCAACAAGTGCTACTGCTTCAAAATATCGGTGTTGGGTAAAAGGTCACATTTTACACAGTACCGATATTGTGAAGCACGTTTGCTTAGGAACTAGGATACAACGAGGAGGCAAATTAAAGCTACCAACAAGCGCTGTAACTCCACACGAAGA	235	44	492	13	1629	18	14658	149	3183	286	7157	276	32069	1003	12931	209	6670	97
miR-2024a	TGTTCTATAAGTATTCCTGGTAATTTTGAGGAGGTGATGTAACTCTACCAACAAGTGCTACTGCTTCAAAATATCGGTGTTGGGTAAAAGGTCACATTTTACACAGTACCGATATTGTGAAGCACGTTTGCTTAGGAACTAGGATACAACGAGGAGGCAAATTAAAGCTACCAACAAGCGCTGTAACTCCACACGAAGACA	235	44	492	13	1629	18	14658	149	3183	286	7157	276	32069	1003	12928	209	6670	97
miR-2024a	TGTTCTATAAGTATTCCTGGTAATTTTGAGGAGGCGATGTAACTCTACCAATAAGTGCTACTGCTTCAAAATATCGGTGTTGGGTAAAAGGTCACATTTTACACAGTACCGATATTGTGAAGCACGTTTGCAAATTAAAGCCACCAACAAGCGCTGTAACTCCACACGAAGACAGGTAACGAGAGAAATCAAGCCGGTGTG	235	44	492	13	1629	18	14656	149	3183	286	7157	276	32069	1003	12931	209	6670	97
miR-2024a	TGTTCTATAAGTATTCCTGGTAATTTTGAGGAGGCGATGTAACTCTACCAACAAGTGCTACTGCTTCAAAATATCGGTGTTGGGTAAAAGGTCACATTTTACACAGTACCGATATTGTGAAGCACGTTTGCTTAGGAACTAGGATACAACGAGGAGGCAAATTAAAGCTACCAACAAGCGCTGTAACTCCACACGAAGACA	235	44	492	13	1629	18	14658	149	3183	286	7157	276	32069	1003	12931	209	6670	97
miR-2024a	TTATGTTCTATAAGTATTCCTGGTAATTTTGAGGAGGCGATGTAACTCTACCAATAAGTGCTACTGCTTCAAAATATCGGTGTTGGGTAAAAGGTCACATTTTACACAGTACCGATATTGTGAAGCACGTTTGCAAATTAAAGCCACCAACAAGCGCTGTAACTCCACACGAAGACAGGTAACGAGAGAAATCAAGCCGGT	235	44	492	13	1629	18	14656	149	3183	286	7157	276	32069	1003	12931	209	6670	97
miR-2024a	TTATGTTCTATAAGTATTCCTGGTAATTTTGAGGAGGTGATGTAACTCTACCAACAAGTGCTACTGCTTCAAAATATCGGTGTTGGGTAAAAGGTCACATTTTACACAGTACCGATATTGTGAAGCACGTTTGCTTAGGAACTAGGATACAACGAGGAGGCAAATTAAAGCTACCAACAAGCGCTGTAACTCCACACGAAG	235	44	492	13	1629	18	14658	149	3183	286	7157	276	32069	1003	12928	209	6670	97
miR-2024a	TTATGTTCTATAAGTATTCCTGGTAATTTTGAGGAGGCGATGTAACTCTACCAACAAGTGCTACTGCTTCAAAATATCGGTGTTGGGTAAAAGGTCACATTTTACACAGTACCGATATTGTGAAGCACGTTTGCTTAGGAACTAGGATACAACGAGGAGGCAAATTAAAGCTACCAACAAGCGCTGTAACTCCACACGAAG	235	44	492	13	1629	18	14658	149	3183	286	7157	276	32069	1003	12931	209	6670	97
miR-2026	ACGATGTTCTCTAGTCATTCAGATGTTGTACTCACTTTGAAATCTCTCATTTCTTACAGCAGTAACAAAGAGGCGTTAAGACTGACTTGTGTCCCCCCGTTTCAAATGTCTACTGATGGAAGTTGGTTCCATCAGTGGGTATTTGAAGTTGAGAGACGCAGAATACACAGGAATATATATGTTTGTGATAGAATGCGCAGA	14	55	165	147	96	97	4101	789	493	2217	4046	4382	11130	12042	5499	5448	6350	6723
miR-2026	ACTCACTTTGAAATCTCTCATTTCTTACAGCAGTAACAAAGAGGCGTTAAGACTGACTTGTGTCCCCCCGTTTCAAATGTCTACTGATGGAAGTTGGTTCCATCAGTGGGTATTTGAAGTTGAGAGACGCAGAATACACAGGAATATATATGTTTGTGATAGAATGCGCAGAAAGAATACAGCAAGATAAAAACCACCGGT	14	55	165	147	96	97	4101	789	493	2217	4046	4382	11130	12042	5498	5448	6350	6723
miR-2026	CGATGTTCTCTAGTCATTCAGATGTTGTACTCACTTTGAAATCTCTCATTTCTTACAGCAGTAACAAAGAGGCGTTAAGACTGACTTGTGTCCCCCCGTTTCAAATGTCTACTGATGGAAGTTGGTTCCATCAGTGGGTATTTGAAGTTGAGAGACGCAGAATACACAGGAATATATATGTTTGTGATAGAATGCGCAGAA	14	55	165	147	96	97	4101	789	493	2217	4046	4382	11130	12042	5499	5448	6350	6723
miR-2026	GACGATGTTCTCTAGTCATTCAGATGTTGTACTCACTTTGAAATCTCTCATTTCTTACAGCAGTAACAAAGAGGCGTTAAGACTGACTTGTGTCCCCCCGTTTCAAATGTCTACTGATGGAAGTTGGTTCCATCAGTGGGTATTTGAAGTTGAGAGACGCAGAATACACAGGAATATATATGTTTGTGATAGAATGCGCAG	14	55	165	147	96	97	4101	789	493	2217	4046	4382	11130	12042	5499	5448	6350	6723
miR-2026	TACTCACTTTGAAATCTCTCATTTCTTACAGCAGTAACAAAGAGGCGTTAAGACTGACTTGTGTCCCCCCGTTTCAAATGTCTACTGATGGAAGTTGGTTCCATCAGTGGGTATTTGAAGTTGAGAGACGCAGAATACACAGGAATATATATGTTTGTGATAGAATGCGCAGAAAGAATACAGCAAGATAAAAACCACCGG	14	55	165	147	96	97	4101	789	493	2217	4046	4382	11130	12042	5498	5448	6350	6723
miR-2026	TGACGATGTTCTCTAGTCATTCAGATGTTGTACTCACTTTGAAATCTCTCATTTCTTACAGCAGTAACAAAGAGGCGTTAAGACTGACTTGTGTCCCCCCGTTTCAAATGTCTACTGATGGAAGTTGGTTCCATCAGTGGGTATTTGAAGTTGAGAGACGCAGAATACACAGGAATATATATGTTTGTGATAGAATGCGCA	14	55	165	147	96	97	4101	789	493	2217	4046	4382	11130	12042	5499	5448	6350	6723
miR-2026	CAGACAGTTGAGCTCACTTGCGGTTGTGTTCTAATGACGTCTGGATATTCCTCTGTAGCGCTTGCATGCTTAGTGACGATGTTCTCTAGTCATTCAGATGTTGTACTCACTTTGAAATCTCTCATTTCTTACAGCAGTAACAAAGAGGCGTTAAGACTGACTTGTGTCCCCCCGTTTCAAATGTCTACTGATGGAAGTTGG	14	55	165	147	94	97	4088	788	491	2217	4041	4382	11123	12041	5491	5448	6343	6723
miR-2030	AATATGAACGAATCAGGAACTTTCGCAGAAAGAAAAAGGCAAACGACGATGACACCCACAGTATGGCCGTATAGCATAACATTGTAAGAGATTGTAAGAACCTCTTTACATTGTTGTGCTGTACGGATATGCTGAATAGTCACAGGCCTGTGGTAAGTAAAAGTTAAGGTGAGTTTACACAATATGCAACGCTACAATGTT	41	26	75	45	253	170	8255	3087	1890	5063	3451	3631	5801	5756	1969	1598	1888	1605
miR-2030	ATATGAACGAATCAGGAACTTTCGCAGAAAGAAAAAGGCAAACGACGATGACACCCACAGTATGGCCGTATAGCATAACATTGTAAGAGATTGTAAGAACCTCTTTACATTGTTGTGCTGTACGGATATGCTGAATAGTCACAGGCCTGTGGTAAGTAAAAGTTAAGGTGAGTTTACACAATATGCAACGCTACAATGTTG	41	26	75	45	253	170	8255	3087	1890	5063	3451	3631	5801	5756	1969	1598	1888	1605
miR-2030	ATGAACGAATCAGGAACTTTCGCAGAAAGAAAAAGGCAAACGACGATGACACCCACAGTATGGCCGTATAGCATAACATTGTAAGAGATTGTAAGAACCTCTTTACATTGTTGTGCTGTACGGATATGCTGAATAGTCACAGGCCTGTGGTAAGTAAAAGTTAAGGTGAGTTTACACAATATGCAACGCTACAATGTTGTT	41	26	75	45	253	170	8255	3087	1890	5063	3451	3631	5801	5756	1969	1598	1888	1605
miR-2030	CCTGTTCAATTTAGCTGTTGTCACCATATAAATATGAACGAATCAGGAACTTTCGCAGAAAGAAAAAGGCAAACGACGATGACACCCACAGTATGGCCGTATAGCATAACATTGTAAGAGATTGTAAGAACCTCTTTACATTGTTGTGCTGTACGGATATGCTGAATAGTCACAGGCCTGTGGTAAGTAAAAGTTAAGGTG	41	26	75	45	253	170	8255	3087	1890	5063	3451	3631	5801	5756	1969	1598	1888	1605
miR-2030	CTGTTCAATTTAGCTGTTGTCACCATATAAATATGAACGAATCAGGAACTTTCGCAGAAAGAAAAAGGCAAACGACGATGACACCCACAGTATGGCCGTATAGCATAACATTGTAAGAGATTGTAAGAACCTCTTTACATTGTTGTGCTGTACGGATATGCTGAATAGTCACAGGCCTGTGGTAAGTAAAAGTTAAGGTGA	41	26	75	45	253	170	8255	3087	1890	5063	3451	3631	5801	5756	1969	1598	1888	1605
miR-2030	GTTCAATTTAGCTGTTGTCACCATATAAATATGAACGAATCAGGAACTTTCGCAGAAAGAAAAAGGCAAACGACGATGACACCCACAGTATGGCCGTATAGCATAACATTGTAAGAGATTGTAAGAACCTCTTTACATTGTTGTGCTGTACGGATATGCTGAATAGTCACAGGCCTGTGGTAAGTAAAAGTTAAGGTGAGT	41	26	75	45	253	170	8255	3087	1890	5063	3451	3631	5801	5756	1969	1598	1888	1605
miR-2030	TGTTCAATTTAGCTGTTGTCACCATATAAATATGAACGAATCAGGAACTTTCGCAGAAAGAAAAAGGCAAACGACGATGACACCCACAGTATGGCCGTATAGCATAACATTGTAAGAGATTGTAAGAACCTCTTTACATTGTTGTGCTGTACGGATATGCTGAATAGTCACAGGCCTGTGGTAAGTAAAAGTTAAGGTGAG	41	26	75	45	253	170	8255	3087	1890	5063	3451	3631	5801	5756	1969	1598	1888	1605
miR-2024e	AAGCGCTGCAAGTAAGCACTGGTAACAAGATCATCAAATAAAAGAGGTTAGAATATTGGTGTTGTGCAAGCAAATCTTGGTATTATGAGGAGGATTATAAACATCAGGTAGACTTGCTTCAGAGTATTGGCGCTGGGCAAAAGGTCACATTTTGCACATTACCAATATTCTGAGGCACTTCTGCTGAAGGAACTAGAAAAT	71	27	135	20	416	47	5508	590	1336	1061	2642	840	6142	1796	4443	712	3762	545
miR-2024e	AATATTGGTGTTGTGCAAGCAAATCTTGGTATTATGAGGAGGATTATAAACATCAGGTAGACTTGCTTCAGAGTATTGGCGCTGGGCAAAAGGTCACATTTTGCACATTACCAATATTCTGAGGCACTTCTGCTGAAGGAACTAGAAAATTACAAGAAGGCGATTAAGACCTACAAACAAGCGCCGCAAGTGTACATGCGG	71	27	135	20	416	47	5508	590	1336	1061	2642	840	6142	1796	4444	712	3762	545
miR-2024e	AATATTGGTGTTGTGCAAGCAAATCTTGGTATTATGAGGAGGATTATAAACATCAGGTAGACTTGCTTCAGAGTATTGGCGCTGGGCAAAAGGTCACATTTTGCACATTACCAATATTCTGAGGCACTTCTGCTGAAGGAACTAGAAAATTACAAGAAGGCGATTAAGACCTACAAACAAGCGCCGCAAGTACTTGCGGAC	71	27	135	20	416	47	5508	590	1336	1061	2642	840	6142	1796	4444	712	3762	545
miR-2024e	ACAAGCGCTGCAAGTAAGCACTGGTAACAAGATCATCAAATAAAAGAGGTTAGAATATTGGTGTTGTGCAAGCAAATCTTGGTATTATGAGGAGGATTATAAACATCAGGTAGACTTGCTTCAGAGTATTGGCGCTGGGCAAAAGGTCACATTTTGCACATTACCAATATTCTGAGGCACTTCTGCTGAAGGAACTAGAAA	71	27	135	20	416	47	5508	590	1336	1061	2642	840	6142	1796	4443	712	3762	545
miR-2024e	ATATTGGTGTTGTGCAAGCAAATCTTGGTATTATGAGGAGGATTATAAACATCAGGTAGACTTGCTTCAGAGTATTGGCGCTGGGCAAAAGGTCACATTTTGCACATTACCAATATTCTGAGGCACTTCTGCTGAAGGAACTAGAAAATTACAAGAAGGCGATTAAGACCTACAAACAAGCGCCGCAAGTGTACATGCGGA	71	27	135	20	416	47	5508	590	1336	1061	2642	840	6142	1796	4444	712	3762	545
miR-2024e	ATATTGGTGTTGTGCAAGCAAATCTTGGTATTATGAGGAGGATTATAAACATCAGGTAGACTTGCTTCAGAGTATTGGCGCTGGGCAAAAGGTCACATTTTGCACATTACCAATATTCTGAGGCACTTCTGCTGAAGGAACTAGAAAATTACAAGAAGGCGATTAAGACCTACAAACAAGCGCCGCAAGTACTTGCGGACT	71	27	135	20	416	47	5508	590	1336	1061	2642	840	6142	1796	4444	712	3762	545
miR-2024e	CAAGCGCTGCAAGTAAGCACTGGTAACAAGATCATCAAATAAAAGAGGTTAGAATATTGGTGTTGTGCAAGCAAATCTTGGTATTATGAGGAGGATTATAAACATCAGGTAGACTTGCTTCAGAGTATTGGCGCTGGGCAAAAGGTCACATTTTGCACATTACCAATATTCTGAGGCACTTCTGCTGAAGGAACTAGAAAA	71	27	135	20	416	47	5508	590	1336	1061	2642	840	6142	1796	4443	712	3762	545
miR-2024e	GAATATTGGTGTTGTGCAAGCAAATCTTGGTATTATGAGGAGGATTATAAACATCAGGTAGACTTGCTTCAGAGTATTGGCGCTGGGCAAAAGGTCACATTTTGCACATTACCAATATTCTGAGGCACTTCTGCTGAAGGAACTAGAAAATTACAAGAAGGCGATTAAGACCTACAAACAAGCGCCGCAAGTACTTGCGGA	71	27	135	20	416	47	5508	590	1336	1061	2642	840	6142	1796	4444	712	3762	545
miR-2024e	GAATATTGGTGTTGTGCAAGCAAATCTTGGTATTATGAGGAGGATTATAAACATCAGGTAGACTTGCTTCAGAGTATTGGCGCTGGGCAAAAGGTCACATTTTGCACATTACCAATATTCTGAGGCACTTCTGCTGAAGGAACTAGAAAATTACAAGAAGGCGATTAAGACCTACAAACAAGCGCCGCAAGTGTACATGCG	71	27	135	20	416	47	5508	590	1336	1061	2642	840	6142	1796	4444	712	3762	545
miR-2024e	GGTAACAAGATCATCAAATAAAAGAGGTTAGAATATTGGTGTTGTGCAAGCAAATCTTGGTATTATGAGGAGGATTATAAACATCAGGTAGACTTGCTTCAGAGTATTGGCGCTGGGCAAAAGGTCACATTTTGCACATTACCAATATTCTGAGGCACTTCTGCTGAAGGAACTAGAAAATTACAAGAAGGCGATTAAGAC	71	27	135	20	416	47	5508	590	1336	1061	2642	840	6142	1796	4443	712	3762	545
miR-2024e	TATTGGTGTTGTGCAAGCAAATCTTGGTATTATGAGGAGGATTATAAACATCAGGTAGACTTGCTTCAGAGTATTGGCGCTGGGCAAAAGGTCACATTTTGCACATTACCAATATTCTGAGGCACTTCTGCTGAAGGAACTAGAAAATTACAAGAAGGCGATTAAGACCTACAAACAAGCGCCGCAAGTACTTGCGGACTT	71	27	135	20	416	47	5508	590	1336	1061	2642	840	6142	1796	4444	712	3762	545
miR-2024e	TATTGGTGTTGTGCAAGCAAATCTTGGTATTATGAGGAGGATTATAAACATCAGGTAGACTTGCTTCAGAGTATTGGCGCTGGGCAAAAGGTCACATTTTGCACATTACCAATATTCTGAGGCACTTCTGCTGAAGGAACTAGAAAATTACAAGAAGGCGATTAAGACCTACAAACAAGCGCCGCAAGTGTACATGCGGAC	71	27	135	20	416	47	5508	590	1336	1061	2642	840	6142	1796	4444	712	3762	545
miR-2024g	AAACAAGCGCCGCAAGTACTTGCGGACTTGTAACAAGAGCGATCGAGCACACGTGAGTCAGAATATTGCTTATGTTCTATAAGTATTCCTGGTAATTTTGAGGAGGCGATGTAACTCTACCAATAAGTGCTACTGCTTCAAAATATCGGTGTTGGGTAAAAGGTCACCTTTTAACACAGTACCGATATTGTGAAGCACGTT	62	14	121	4	773	21	3860	169	1092	287	1901	272	6831	1102	2809	219	1250	88
miR-2024g	ACAAGCGCCGCAAGTGTACATGCAGACTTGTAACAAGAGCGATCGAGCACATGTGAGTCAGAATATTGCTTATGTTCTATAAGTATTTCTGGTAATTTTGAGGAGGCGATGTAACTCTACCAACAGGTGCTACTGCTTCAAAATATCGGTGTTGGGTAAGAGGTCACATTTTAACACAGTACCGATATTGTGAAGCACGTT	62	14	123	6	672	28	3830	246	949	487	1899	414	7163	1695	2792	263	1238	119
miR-2024g	ACAAGCGCCGCAAGTGTACATGCGGACTTGTAACAAGAGCGATCGAGCACACGTGAGTCAGAATATTGCTTATGTTCTATAAGTATTCCTGGTAATTTTGAGGAGGCGATGTAACTCTACCAATAAGTGCTACTGCTTCAAAATATCGGTGTTGGGTAAAAGGTCACCTTTTAACACAGTACCGATATTGTGAAGCACGTT	62	14	121	4	773	21	3860	169	1092	287	1901	273	6831	1102	2810	219	1250	88
miR-2024g	ACAAGCGCCGCAAGTGTACATGCGGACTTGTAACAAGAGCGATCGAGCACACGCGAGTCAGAATATTGCTTATGTTCTATAAGTATTCCTGGTAATTTTGAGGAGGCGATGTAACTCTACCAATAAGTGCTACTGCTTCAAAATATCGGTGTTGGGTAAAAGGTCACCTTTTAACACAGTACCGATATTGTGAAGCACGTT	62	14	121	4	773	21	3860	169	1092	287	1901	273	6831	1102	2810	219	1249	88
miR-2024g	AGCGCCGCAAGTGTACATGCGGACTTGTAACAAGAGCGATCGAGCACACGCGAGTCAGAATATTGCTTATGTTCTATAAGTATTCCTGGTAATTTTGAGGAGGCGATGTAACTCTACCAATAAGTGCTACTGCTTCAAAATATCGGTGTTGGGTAAAAGGTCACCTTTTAACACAGTACCGATATTGTGAAGCACGTTTGC	62	14	121	4	773	21	3860	169	1092	287	1901	273	6831	1102	2810	219	1249	88
miR-2024g	AGCGCCGCAAGTGTACATGCGGACTTGTAACAAGAGCGATCGAGCACACGTGAGTCAGAATATTGCTTATGTTCTATAAGTATTCCTGGTAATTTTGAGGAGGCGATGTAACTCTACCAATAAGTGCTACTGCTTCAAAATATCGGTGTTGGGTAAAAGGTCACCTTTTAACACAGTACCGATATTGTGAAGCACGTTTGC	62	14	121	4	773	21	3860	169	1092	287	1901	273	6831	1102	2810	219	1250	88
miR-2024g	AGCGCCGCAAGTGTACATGCAGACTTGTAACAAGAGCGATCGAGCACATGTGAGTCAGAATATTGCTTATGTTCTATAAGTATTTCTGGTAATTTTGAGGAGGCGATGTAACTCTACCAACAGGTGCTACTGCTTCAAAATATCGGTGTTGGGTAAGAGGTCACATTTTAACACAGTACCGATATTGTGAAGCACGTTTGC	62	14	123	6	672	28	3830	246	949	487	1899	414	7163	1695	2792	263	1238	119
miR-2024g	ATCGAGCACACGCGAGTCAGAATATTGCTTATGTTCTATAAGTATTCCTGGTAATTTTGAGGAGGCGATGTAACTCTACCAATAAGTGCTACTGCTTCAAAATATCGGTGTTGGGTAAAAGGTCACCTTTTAACACAGTACCGATATTGTGAAGCACGTTTGCAAATTAAAGCTACCAACAAGCGCTGTAACTCCACACGA	62	14	121	4	773	21	3860	169	1092	287	1901	272	6831	1102	2808	219	1249	88
miR-2024g	ATCGAGCACACGTGAGTCAGAATATTGCTTATGTTCTATAAGTATTCCTGGTAATTTTGAGGAGGCGATGTAACTCTACCAATAAGTGCTACTGCTTCAAAATATCGGTGTTGGGTAAAAGGTCACCTTTTAACACAGTACCGATATTGTGAAGCACGTTTGCAAATTAAAGCTACCAACAAGCGCTGTAACTCCACACGA	62	14	121	4	773	21	3860	169	1092	287	1901	272	6831	1102	2808	219	1250	88
miR-2024g	ATCGAGCACATGTGAGTCAGAATATTGCTTATGTTCTATAAGTATTTCTGGTAATTTTGAGGAGGCGATGTAACTCTACCAACAGGTGCTACTGCTTCAAAATATCGGTGTTGGGTAAGAGGTCACATTTTAACACAGTACCGATATTGTGAAGCACGTTTGCAAATTAAAGCTACCAACAAGCGCTGTAACTCCACACGA	62	14	123	6	672	28	3830	246	949	487	1899	414	7163	1695	2791	263	1238	119
miR-2024g	ATGTTCTATAAGTATTTCTGGTAATTTTGAGGAGGCGATGTAACTCTACCAACAGGTGCTACTGCTTCAAAATATCGGTGTTGGGTAAGAGGTCACATTTTAACACAGTACCGATATTGTGAAGCACGTTTGCAAATTAAAGCTACCAACAAGCGCTGTAACTCCACACGAAGACAGGTAACGAGAGAAATCAAGCCCGTG	62	14	123	6	672	28	3830	246	949	487	1899	414	7163	1695	2791	263	1238	119
miR-2024g	ATGTTCTATAAGTATTCCTGGTAATTTTGAGGAGGCGATGTAACTCTACCAATAAGTGCTACTGCTTCAAAATATCGGTGTTGGGTAAAAGGTCACCTTTTAACACAGTACCGATATTGTGAAGCACGTTTGCAAATTAAAGCTACCAACAAGCGCTGTAACTCCACACGAAGACAGGTAACGAGAGAAATCAAGCCCGTG	62	14	121	4	773	21	3860	169	1092	287	1901	272	6831	1102	2808	219	1249	88
miR-2024g	CAAGCGCCGCAAGTACTTGCGGACTTGTAACAAGAGCGATCGAGCACACGTGAGTCAGAATATTGCTTATGTTCTATAAGTATTCCTGGTAATTTTGAGGAGGCGATGTAACTCTACCAATAAGTGCTACTGCTTCAAAATATCGGTGTTGGGTAAAAGGTCACCTTTTAACACAGTACCGATATTGTGAAGCACGTTTGC	62	14	121	4	773	21	3860	169	1092	287	1901	272	6831	1102	2809	219	1250	88
miR-2024g	CGATCGAGCACACGCGAGTCAGAATATTGCTTATGTTCTATAAGTATTCCTGGTAATTTTGAGGAGGCGATGTAACTCTACCAATAAGTGCTACTGCTTCAAAATATCGGTGTTGGGTAAAAGGTCACCTTTTAACACAGTACCGATATTGTGAAGCACGTTTGCAAATTAAAGCTACCAACAAGCGCTGTAACTCCACAC	62	14	121	4	773	21	3860	169	1092	287	1901	272	6831	1102	2808	219	1249	88
miR-2024g	CGATCGAGCACATGTGAGTCAGAATATTGCTTATGTTCTATAAGTATTTCTGGTAATTTTGAGGAGGCGATGTAACTCTACCAACAGGTGCTACTGCTTCAAAATATCGGTGTTGGGTAAGAGGTCACATTTTAACACAGTACCGATATTGTGAAGCACGTTTGCAAATTAAAGCTACCAACAAGCGCTGTAACTCCACAC	62	14	123	6	672	28	3830	246	949	487	1899	414	7163	1695	2791	263	1238	119
miR-2024g	CGATCGAGCACACGTGAGTCAGAATATTGCTTATGTTCTATAAGTATTCCTGGTAATTTTGAGGAGGCGATGTAACTCTACCAATAAGTGCTACTGCTTCAAAATATCGGTGTTGGGTAAAAGGTCACCTTTTAACACAGTACCGATATTGTGAAGCACGTTTGCAAATTAAAGCTACCAACAAGCGCTGTAACTCCACAC	62	14	121	4	773	21	3860	169	1092	287	1901	272	6831	1102	2808	219	1250	88
miR-2024g	GATCGAGCACATGTGAGTCAGAATATTGCTTATGTTCTATAAGTATTTCTGGTAATTTTGAGGAGGCGATGTAACTCTACCAACAGGTGCTACTGCTTCAAAATATCGGTGTTGGGTAAGAGGTCACATTTTAACACAGTACCGATATTGTGAAGCACGTTTGCAAATTAAAGCTACCAACAAGCGCTGTAACTCCACACG	62	14	123	6	672	28	3830	246	949	487	1899	414	7163	1695	2791	263	1238	119
miR-2024g	GATCGAGCACACGTGAGTCAGAATATTGCTTATGTTCTATAAGTATTCCTGGTAATTTTGAGGAGGCGATGTAACTCTACCAATAAGTGCTACTGCTTCAAAATATCGGTGTTGGGTAAAAGGTCACCTTTTAACACAGTACCGATATTGTGAAGCACGTTTGCAAATTAAAGCTACCAACAAGCGCTGTAACTCCACACG	62	14	121	4	773	21	3860	169	1092	287	1901	272	6831	1102	2808	219	1250	88
miR-2024g	GATCGAGCACACGCGAGTCAGAATATTGCTTATGTTCTATAAGTATTCCTGGTAATTTTGAGGAGGCGATGTAACTCTACCAATAAGTGCTACTGCTTCAAAATATCGGTGTTGGGTAAAAGGTCACCTTTTAACACAGTACCGATATTGTGAAGCACGTTTGCAAATTAAAGCTACCAACAAGCGCTGTAACTCCACACG	62	14	121	4	773	21	3860	169	1092	287	1901	272	6831	1102	2808	219	1249	88
miR-2024g	GCGATCGAGCACATGTGAGTCAGAATATTGCTTATGTTCTATAAGTATTTCTGGTAATTTTGAGGAGGCGATGTAACTCTACCAACAGGTGCTACTGCTTCAAAATATCGGTGTTGGGTAAGAGGTCACATTTTAACACAGTACCGATATTGTGAAGCACGTTTGCAAATTAAAGCTACCAACAAGCGCTGTAACTCCACA	62	14	123	6	672	28	3830	246	949	487	1899	414	7163	1695	2791	263	1238	119
miR-2024g	GTTCTATAAGTATTTCTGGTAATTTTGAGGAGGCGATGTAACTCTACCAACAGGTGCTACTGCTTCAAAATATCGGTGTTGGGTAAGAGGTCACATTTTAACACAGTACCGATATTGTGAAGCACGTTTGCAAATTAAAGCTACCAACAAGCGCTGTAACTCCACACGAAGACAGGTAACGAGAGAAATCAAGCCCGTGTG	62	14	123	6	672	28	3830	246	949	487	1899	414	7163	1695	2791	263	1238	119
miR-2024g	GTTCTATAAGTATTCCTGGTAATTTTGAGGAGGCGATGTAACTCTACCAATAAGTGCTACTGCTTCAAAATATCGGTGTTGGGTAAAAGGTCACCTTTTAACACAGTACCGATATTGTGAAGCACGTTTGCAAATTAAAGCTACCAACAAGCGCTGTAACTCCACACGAAGACAGGTAACGAGAGAAATCAAGCCCGTGTG	62	14	121	4	773	21	3860	169	1092	287	1901	272	6831	1102	2808	219	1249	88
miR-2024g	TACATGCGGACTTGTAACAAGAGCGATCGAGCACACGTGAGTCAGAATATTGCTTATGTTCTATAAGTATTCCTGGTAATTTTGAGGAGGCGATGTAACTCTACCAATAAGTGCTACTGCTTCAAAATATCGGTGTTGGGTAAAAGGTCACCTTTTAACACAGTACCGATATTGTGAAGCACGTTTGCAAATTAAAGCTAC	62	14	121	4	773	21	3860	169	1092	287	1901	273	6831	1102	2809	219	1250	88
miR-2024g	TACATGCGGACTTGTAACAAGAGCGATCGAGCACACGCGAGTCAGAATATTGCTTATGTTCTATAAGTATTCCTGGTAATTTTGAGGAGGCGATGTAACTCTACCAATAAGTGCTACTGCTTCAAAATATCGGTGTTGGGTAAAAGGTCACCTTTTAACACAGTACCGATATTGTGAAGCACGTTTGCAAATTAAAGCTAC	62	14	121	4	773	21	3860	169	1092	287	1901	273	6831	1102	2809	219	1249	88
miR-2024g	TACTTGCGGACTTGTAACAAGAGCGATCGAGCACACGTGAGTCAGAATATTGCTTATGTTCTATAAGTATTCCTGGTAATTTTGAGGAGGCGATGTAACTCTACCAATAAGTGCTACTGCTTCAAAATATCGGTGTTGGGTAAAAGGTCACCTTTTAACACAGTACCGATATTGTGAAGCACGTTTGCAAATTAAAGCTAC	62	14	121	4	773	21	3860	169	1092	287	1901	272	6831	1102	2809	219	1250	88
miR-2024g	TATGTTCTATAAGTATTTCTGGTAATTTTGAGGAGGCGATGTAACTCTACCAACAGGTGCTACTGCTTCAAAATATCGGTGTTGGGTAAGAGGTCACATTTTAACACAGTACCGATATTGTGAAGCACGTTTGCAAATTAAAGCTACCAACAAGCGCTGTAACTCCACACGAAGACAGGTAACGAGAGAAATCAAGCCCGT	62	14	123	6	672	28	3830	246	949	487	1899	414	7163	1695	2791	263	1238	119
miR-2024g	TATGTTCTATAAGTATTCCTGGTAATTTTGAGGAGGCGATGTAACTCTACCAATAAGTGCTACTGCTTCAAAATATCGGTGTTGGGTAAAAGGTCACCTTTTAACACAGTACCGATATTGTGAAGCACGTTTGCAAATTAAAGCTACCAACAAGCGCTGTAACTCCACACGAAGACAGGTAACGAGAGAAATCAAGCCCGT	62	14	121	4	773	21	3860	169	1092	287	1901	272	6831	1102	2808	219	1249	88
miR-2024g	TGTTCTATAAGTATTTCTGGTAATTTTGAGGAGGCGATGTAACTCTACCAACAGGTGCTACTGCTTCAAAATATCGGTGTTGGGTAAGAGGTCACATTTTAACACAGTACCGATATTGTGAAGCACGTTTGCAAATTAAAGCTACCAACAAGCGCTGTAACTCCACACGAAGACAGGTAACGAGAGAAATCAAGCCCGTGT	62	14	123	6	672	28	3830	246	949	487	1899	414	7163	1695	2791	263	1238	119
miR-2024g	TGTTCTATAAGTATTCCTGGTAATTTTGAGGAGGCGATGTAACTCTACCAATAAGTGCTACTGCTTCAAAATATCGGTGTTGGGTAAAAGGTCACCTTTTAACACAGTACCGATATTGTGAAGCACGTTTGCAAATTAAAGCTACCAACAAGCGCTGTAACTCCACACGAAGACAGGTAACGAGAGAAATCAAGCCCGTGT	62	14	121	4	773	21	3860	169	1092	287	1901	272	6831	1102	2808	219	1249	88
miR-2024g	TTATGTTCTATAAGTATTTCTGGTAATTTTGAGGAGGCGATGTAACTCTACCAACAGGTGCTACTGCTTCAAAATATCGGTGTTGGGTAAGAGGTCACATTTTAACACAGTACCGATATTGTGAAGCACGTTTGCAAATTAAAGCTACCAACAAGCGCTGTAACTCCACACGAAGACAGGTAACGAGAGAAATCAAGCCCG	62	14	123	6	672	28	3830	246	949	487	1899	414	7163	1695	2791	263	1238	119
miR-2024g	TTATGTTCTATAAGTATTCCTGGTAATTTTGAGGAGGCGATGTAACTCTACCAATAAGTGCTACTGCTTCAAAATATCGGTGTTGGGTAAAAGGTCACCTTTTAACACAGTACCGATATTGTGAAGCACGTTTGCAAATTAAAGCTACCAACAAGCGCTGTAACTCCACACGAAGACAGGTAACGAGAGAAATCAAGCCCG	62	14	121	4	773	21	3860	169	1092	287	1901	272	6831	1102	2808	219	1249	88
miR-2025	CGGGAGTGGAGACCCAAAAGGCGTTCATGTCGACACAGCAAGAATATGATCAACAATTAGGCCACATACAAAGCTTTCGATGGCTAGAAAATCCTTAGTGATTTTTTAGCCCGCGGAAGTTGTGTTGCCTGGCCAATATTACCATTAGGGTGAAGGCAATGATCAAGACGAGGTTGTACTGGAAGACGCGAAGGCTGTTTA	1	11	34	28	9	3	1527	144	75	824	951	1177	5158	6107	1360	1114	922	960
miR-2025	GAGTGGAGACCCAAAAGGCGTTCATGTCGACACAGCAAGAATATGATCAACAATTAGGCCACATACAAAGCTTTCGATGGCTAGAAAATCCTTAGTGATTTTTTAGCCCGCGGAAGTTGTGTTGCCTGGCCAATATTACCATTAGGGTGAAGGCAATGATCAAGACGAGGTTGTACTGGAAGACGCGAAGGCTGTTTATTT	1	11	34	28	9	3	1527	144	75	824	951	1177	5158	6107	1360	1114	922	960
miR-2025	GGAGTGGAGACCCAAAAGGCGTTCATGTCGACACAGCAAGAATATGATCAACAATTAGGCCACATACAAAGCTTTCGATGGCTAGAAAATCCTTAGTGATTTTTTAGCCCGCGGAAGTTGTGTTGCCTGGCCAATATTACCATTAGGGTGAAGGCAATGATCAAGACGAGGTTGTACTGGAAGACGCGAAGGCTGTTTATT	1	11	34	28	9	3	1527	144	75	824	951	1177	5158	6107	1360	1114	922	960
miR-2025	GGGAGTGGAGACCCAAAAGGCGTTCATGTCGACACAGCAAGAATATGATCAACAATTAGGCCACATACAAAGCTTTCGATGGCTAGAAAATCCTTAGTGATTTTTTAGCCCGCGGAAGTTGTGTTGCCTGGCCAATATTACCATTAGGGTGAAGGCAATGATCAAGACGAGGTTGTACTGGAAGACGCGAAGGCTGTTTAT	1	11	34	28	9	3	1527	144	75	824	951	1177	5158	6107	1360	1114	922	960
miR-2025	TAACGCTAGTGCAGTAGCAAAACTACAACCGGGAGTGGAGACCCAAAAGGCGTTCATGTCGACACAGCAAGAATATGATCAACAATTAGGCCACATACAAAGCTTTCGATGGCTAGAAAATCCTTAGTGATTTTTTAGCCCGCGGAAGTTGTGTTGCCTGGCCAATATTACCATTAGGGTGAAGGCAATGATCAAGACGAG	1	11	34	28	9	3	1527	144	75	824	951	1177	5158	6107	1360	1114	922	960
miR-2024f	AACGAGATCATCAATTAGAAGTAGTTAGAATATTGGTGTTGTGCAAGCGAATCTTGGTAATTATGAGGAGGATTATAAAGAGCAGGTAGACTTGCTTCAGAATATTGGTACTGGGCAAAAGGTCACGTTTTGCACATCACCAATGTTCTGAGGCACTTCTGCTGAAGGAACTAGGAAATTACAAGAAGGCGATTAAGACCT	95	21	175	3	348	13	3162	161	869	296	1993	232	5506	505	3635	161	2864	76
miR-2024f	AACGAGATCATCAATTAGAAGTAGTTAGAATATTGGTGTTGTGCAAGCGAATCTTGGAAATTATGAGGAGGATTATAAAGATCAGGTAGACTTGCTTCAGAATATTGGTACTGGGCAAAAGGTCACGTTTTGCACATCACCAATGTTCTGAGGCACTTCTGCTGAAGGAACTAGGAAATTACAAGGAGGTGATTAAGACCT	95	21	175	3	349	13	3167	161	871	296	1995	232	5507	505	3636	161	2868	76
miR-2024f	AAGCGCTGCAAGTGTACGTAAGCACTGGTAACGAGATCATCAATTAGAAGTAGTTAGAATATTGGTGTTGTGCAAGCGAATCTTGGAAATTATGAGGAGGATTATAAAGATCAGGTAGACTTGCTTCAGAATATTGGTACTGGGCAAAAGGTCACGTTTTGCACATCACCAATGTTCTGAGGCACTTCTGCTGAAGGAACT	95	21	175	3	349	13	3165	161	870	296	1995	232	5506	505	3634	161	2868	76
miR-2024f	ATATTGGTGTTGTGCAAGCGAATCTTGGTAATTATGAGGAGGATTATAAAGAGCAGGTAGACTTGCTTCAGAATATTGGTACTGGGCAAAAGGTCACGTTTTGCACATCACCAATGTTCTGAGGCACTTCTGCTGAAGGAACTAGGAAATTACAAGAAGGCGATTAAGACCTACAAACAAGCGCCGCAAGTGTACATGCGG	95	21	175	3	348	13	3162	161	869	296	1993	232	5506	505	3636	161	2864	76
miR-2024f	ATATTGGTGTTGTGCAAGCGAATCTTGGAAATTATGAGGAGGATTATAAAGATCAGGTAGACTTGCTTCAGAATATTGGTACTGGGCAAAAGGTCACGTTTTGCACATCACCAATGTTCTGAGGCACTTCTGCTGAAGGAACTAGGAAATTACAAGGAGGTGATTAAGACCTACAAACAAGCGCCGCAAGTGTACATGCGG	95	21	175	3	349	13	3167	161	871	296	1995	232	5507	505	3637	161	2868	76
miR-2024f	ATGAGGAGGATTATAAAGAGCAGGTAGACTTGCTTCAGAATATTGGTACTGGGCAAAAGGTCACGTTTTGCACATCACCAATGTTCTGAGGCACTTCTGCTGAAGGAACTAGGAAATTACAAGAAGGCGATTAAGACCTACAAACAAGCGCCGCAAGTGTACATGCGGATTTGTAACAAGAGCGATTGAGCACACGTGAGT	95	21	175	3	348	13	3162	161	869	296	1993	232	5506	505	3636	161	2864	76
miR-2024f	ATGAGGAGGATTATAAAGATCAGGTAGACTTGCTTCAGAATATTGGTACTGGGCAAAAGGTCACGTTTTGCACATCACCAATGTTCTGAGGCACTTCTGCTGAAGGAACTAGGAAATTACAAGGAGGTGATTAAGACCTACAAACAAGCGCCGCAAGTGTACATGCGGACTTGTAACAAGAGCGATCGAGCACACGTGAGT	95	21	175	3	349	13	3167	161	871	296	1995	233	5507	505	3639	161	2868	76
miR-2024f	ATTGGTGTTGTGCAAGCGAATCTTGGTAATTATGAGGAGGATTATAAAGAGCAGGTAGACTTGCTTCAGAATATTGGTACTGGGCAAAAGGTCACGTTTTGCACATCACCAATGTTCTGAGGCACTTCTGCTGAAGGAACTAGGAAATTACAAGAAGGCGATTAAGACCTACAAACAAGCGCCGCAAGTGTACATGCGGAT	95	21	175	3	348	13	3162	161	869	296	1993	232	5506	505	3636	161	2864	76
miR-2024f	ATTGGTGTTGTGCAAGCGAATCTTGGAAATTATGAGGAGGATTATAAAGATCAGGTAGACTTGCTTCAGAATATTGGTACTGGGCAAAAGGTCACGTTTTGCACATCACCAATGTTCTGAGGCACTTCTGCTGAAGGAACTAGGAAATTACAAGGAGGTGATTAAGACCTACAAACAAGCGCCGCAAGTGTACATGCGGAC	95	21	175	3	349	13	3167	161	871	296	1995	232	5507	505	3637	161	2868	76
miR-2024f	GCAAGTGTACGTAAGCACTGGTAACGAGATCATCAATTAGAAGTAGTTAGAATATTGGTGTTGTGCAAGCGAATCTTGGAAATTATGAGGAGGATTATAAAGATCAGGTAGACTTGCTTCAGAATATTGGTACTGGGCAAAAGGTCACGTTTTGCACATCACCAATGTTCTGAGGCACTTCTGCTGAAGGAACTAGGAAAT	95	21	175	3	349	13	3167	161	870	296	1995	232	5507	505	3634	161	2868	76
miR-2024f	GTAACGAGATCATCAATTAGAAGTAGTTAGAATATTGGTGTTGTGCAAGCGAATCTTGGTAATTATGAGGAGGATTATAAAGAGCAGGTAGACTTGCTTCAGAATATTGGTACTGGGCAAAAGGTCACGTTTTGCACATCACCAATGTTCTGAGGCACTTCTGCTGAAGGAACTAGGAAATTACAAGAAGGCGATTAAGAC	95	21	175	3	348	13	3162	161	869	296	1993	232	5506	505	3635	161	2864	76
miR-2024f	GTAACGAGATCATCAATTAGAAGTAGTTAGAATATTGGTGTTGTGCAAGCGAATCTTGGAAATTATGAGGAGGATTATAAAGATCAGGTAGACTTGCTTCAGAATATTGGTACTGGGCAAAAGGTCACGTTTTGCACATCACCAATGTTCTGAGGCACTTCTGCTGAAGGAACTAGGAAATTACAAGGAGGTGATTAAGAC	95	21	175	3	349	13	3167	161	871	296	1995	232	5507	505	3636	161	2868	76
miR-2024f	TAACGAGATCATCAATTAGAAGTAGTTAGAATATTGGTGTTGTGCAAGCGAATCTTGGTAATTATGAGGAGGATTATAAAGAGCAGGTAGACTTGCTTCAGAATATTGGTACTGGGCAAAAGGTCACGTTTTGCACATCACCAATGTTCTGAGGCACTTCTGCTGAAGGAACTAGGAAATTACAAGAAGGCGATTAAGACC	95	21	175	3	348	13	3162	161	869	296	1993	232	5506	505	3635	161	2864	76
miR-2024f	TAACGAGATCATCAATTAGAAGTAGTTAGAATATTGGTGTTGTGCAAGCGAATCTTGGAAATTATGAGGAGGATTATAAAGATCAGGTAGACTTGCTTCAGAATATTGGTACTGGGCAAAAGGTCACGTTTTGCACATCACCAATGTTCTGAGGCACTTCTGCTGAAGGAACTAGGAAATTACAAGGAGGTGATTAAGACC	95	21	175	3	349	13	3167	161	871	296	1995	232	5507	505	3636	161	2868	76
miR-2024f	TATTGGTGTTGTGCAAGCGAATCTTGGTAATTATGAGGAGGATTATAAAGAGCAGGTAGACTTGCTTCAGAATATTGGTACTGGGCAAAAGGTCACGTTTTGCACATCACCAATGTTCTGAGGCACTTCTGCTGAAGGAACTAGGAAATTACAAGAAGGCGATTAAGACCTACAAACAAGCGCCGCAAGTGTACATGCGGA	95	21	175	3	348	13	3162	161	869	296	1993	232	5506	505	3636	161	2864	76
miR-2024f	TATTGGTGTTGTGCAAGCGAATCTTGGAAATTATGAGGAGGATTATAAAGATCAGGTAGACTTGCTTCAGAATATTGGTACTGGGCAAAAGGTCACGTTTTGCACATCACCAATGTTCTGAGGCACTTCTGCTGAAGGAACTAGGAAATTACAAGGAGGTGATTAAGACCTACAAACAAGCGCCGCAAGTGTACATGCGGA	95	21	175	3	349	13	3167	161	871	296	1995	232	5507	505	3637	161	2868	76
miR-2024f	TGCAAGTGTACGTAAGCACTGGTAACGAGATCATCAATTAGAAGTAGTTAGAATATTGGTGTTGTGCAAGCGAATCTTGGAAATTATGAGGAGGATTATAAAGATCAGGTAGACTTGCTTCAGAATATTGGTACTGGGCAAAAGGTCACGTTTTGCACATCACCAATGTTCTGAGGCACTTCTGCTGAAGGAACTAGGAAA	95	21	175	3	349	13	3167	161	870	296	1995	232	5507	505	3634	161	2868	76
miR-2028	AAGCCAAGAACTGCCGCAGATGATGAATACGAAAGCTGATGAATAAAGACAATGATGGTGTAGGACGATGGAGTCTTAATGTTCCTGCTTGTTCCTATATATTAGGAACTAGCAGGAGCATTAAGATTACAGTCGTCAATAAACACGGATTACAGAAACACAGGGTCGCCGTGGTCTCTAATAGAGTAGTGCTTATATAAG	21	11	53	2	160	0	1318	20	682	17	708	25	3908	133	1949	39	1685	42
miR-2028	AGAACTGCCGCAGATGATGAATACGAAAGCTGATGAATAAAGACAATGATGGTGTAGGACGATGGAGTCTTAATGTTCCTGCTTGTTCCTATATATTAGGAACTAGCAGGAGCATTAAGATTACAGTCGTCAATAAACACGGATTACAGAAACACAGGGTCGCCGTGGTCTCTAATAGAGTAGTGCTTATATAAGATAAAG	21	11	53	2	160	0	1318	20	682	17	708	25	3908	133	1949	39	1685	42
miR-2028	AGAGAAGGTATTGATAGACTTTAAGCCAAGAACTGCCGCAGATGATGAATACGAAAGCTGATGAATAAAGACAATGATGGTGTAGGACGATGGAGTCTTAATGTTCCTGCTTGTTCCTATATATTAGGAACTAGCAGGAGCATTAAGATTACAGTCGTCAATAAACACGGATTACAGAAACACAGGGTCGCCGTGGTCTCT	21	11	53	2	160	0	1318	20	682	17	708	25	3908	133	1949	39	1685	42
miR-2028	AGCCAAGAACTGCCGCAGATGATGAATACGAAAGCTGATGAATAAAGACAATGATGGTGTAGGACGATGGAGTCTTAATGTTCCTGCTTGTTCCTATATATTAGGAACTAGCAGGAGCATTAAGATTACAGTCGTCAATAAACACGGATTACAGAAACACAGGGTCGCCGTGGTCTCTAATAGAGTAGTGCTTATATAAGA	21	11	53	2	160	0	1318	20	682	17	708	25	3908	133	1949	39	1685	42
miR-2028	ATAGAGAAGGTATTGATAGACTTTAAGCCAAGAACTGCCGCAGATGATGAATACGAAAGCTGATGAATAAAGACAATGATGGTGTAGGACGATGGAGTCTTAATGTTCCTGCTTGTTCCTATATATTAGGAACTAGCAGGAGCATTAAGATTACAGTCGTCAATAAACACGGATTACAGAAACACAGGGTCGCCGTGGTCT	21	11	53	2	160	0	1318	20	682	17	708	25	3908	133	1949	39	1685	42
miR-2028	CAAGAACTGCCGCAGATGATGAATACGAAAGCTGATGAATAAAGACAATGATGGTGTAGGACGATGGAGTCTTAATGTTCCTGCTTGTTCCTATATATTAGGAACTAGCAGGAGCATTAAGATTACAGTCGTCAATAAACACGGATTACAGAAACACAGGGTCGCCGTGGTCTCTAATAGAGTAGTGCTTATATAAGATAA	21	11	53	2	160	0	1318	20	682	17	708	25	3908	133	1949	39	1685	42
miR-2028	CCAAGAACTGCCGCAGATGATGAATACGAAAGCTGATGAATAAAGACAATGATGGTGTAGGACGATGGAGTCTTAATGTTCCTGCTTGTTCCTATATATTAGGAACTAGCAGGAGCATTAAGATTACAGTCGTCAATAAACACGGATTACAGAAACACAGGGTCGCCGTGGTCTCTAATAGAGTAGTGCTTATATAAGATA	21	11	53	2	160	0	1318	20	682	17	708	25	3908	133	1949	39	1685	42
miR-2028	GATAGAGAAGGTATTGATAGACTTTAAGCCAAGAACTGCCGCAGATGATGAATACGAAAGCTGATGAATAAAGACAATGATGGTGTAGGACGATGGAGTCTTAATGTTCCTGCTTGTTCCTATATATTAGGAACTAGCAGGAGCATTAAGATTACAGTCGTCAATAAACACGGATTACAGAAACACAGGGTCGCCGTGGTC	21	11	53	2	160	0	1318	20	682	17	708	25	3908	133	1949	39	1685	42
miR-2028	GCCAAGAACTGCCGCAGATGATGAATACGAAAGCTGATGAATAAAGACAATGATGGTGTAGGACGATGGAGTCTTAATGTTCCTGCTTGTTCCTATATATTAGGAACTAGCAGGAGCATTAAGATTACAGTCGTCAATAAACACGGATTACAGAAACACAGGGTCGCCGTGGTCTCTAATAGAGTAGTGCTTATATAAGAT	21	11	53	2	160	0	1318	20	682	17	708	25	3908	133	1949	39	1685	42
miR-2028	TAAGCCAAGAACTGCCGCAGATGATGAATACGAAAGCTGATGAATAAAGACAATGATGGTGTAGGACGATGGAGTCTTAATGTTCCTGCTTGTTCCTATATATTAGGAACTAGCAGGAGCATTAAGATTACAGTCGTCAATAAACACGGATTACAGAAACACAGGGTCGCCGTGGTCTCTAATAGAGTAGTGCTTATATAA	21	11	53	2	160	0	1318	20	682	17	708	25	3908	133	1949	39	1685	42
miR-2028	TAGAGAAGGTATTGATAGACTTTAAGCCAAGAACTGCCGCAGATGATGAATACGAAAGCTGATGAATAAAGACAATGATGGTGTAGGACGATGGAGTCTTAATGTTCCTGCTTGTTCCTATATATTAGGAACTAGCAGGAGCATTAAGATTACAGTCGTCAATAAACACGGATTACAGAAACACAGGGTCGCCGTGGTCTC	21	11	53	2	160	0	1318	20	682	17	708	25	3908	133	1949	39	1685	42
miR-2029	AGTAGTTTGAGAGCGTAGTCAATACTGAACCTATTATCCGGATAGAAAGCACATAGTGTGGCATTTAGGTGATACGCAATCCCTAGGTTACCATGTCAGATGGTAAACTATGGATTGCGCTTCTCCTAACTTGCCTAACTGCAATGCTACAGCATGTACAAGCAGAAATTAGTGCCTGCAACAGAACAACAAGGAACACAC	11	20	59	15	236	55	1519	555	506	831	857	820	2707	2251	1616	926	1424	702
miR-2029	AGTTTGAGAGCGTAGTCAATACTGAACCTATTATCCGGATAGAAAGCACATAGTGTGGCATTTAGGTGATACGCAATCCCTAGGTTACCATGTCAGATGGTAAACTATGGATTGCGCTTCTCCTAACTTGCCTAACTGCAATGCTACAGCATGTACAAGCAGAAATTAGTGCCTGCAACAGAACAACAAGGAACACACAAA	11	20	59	15	236	55	1519	555	506	831	857	820	2707	2251	1616	926	1424	702
miR-2029	ATAGAATGGCTGACAAGTAAAGCTTACAGTAGTTTGAGAGCGTAGTCAATACTGAACCTATTATCCGGATAGAAAGCACATAGTGTGGCATTTAGGTGATACGCAATCCCTAGGTTACCATGTCAGATGGTAAACTATGGATTGCGCTTCTCCTAACTTGCCTAACTGCAATGCTACAGCATGTACAAGCAGAAATTAGTG	11	20	59	15	236	55	1519	555	506	831	857	820	2707	2251	1616	926	1424	702
miR-2029	ATATAGAATGGCTGACAAGTAAAGCTTACAGTAGTTTGAGAGCGTAGTCAATACTGAACCTATTATCCGGATAGAAAGCACATAGTGTGGCATTTAGGTGATACGCAATCCCTAGGTTACCATGTCAGATGGTAAACTATGGATTGCGCTTCTCCTAACTTGCCTAACTGCAATGCTACAGCATGTACAAGCAGAAATTAG	11	20	59	15	236	55	1519	555	506	831	857	820	2707	2251	1616	926	1424	702
miR-2029	GTAGTTTGAGAGCGTAGTCAATACTGAACCTATTATCCGGATAGAAAGCACATAGTGTGGCATTTAGGTGATACGCAATCCCTAGGTTACCATGTCAGATGGTAAACTATGGATTGCGCTTCTCCTAACTTGCCTAACTGCAATGCTACAGCATGTACAAGCAGAAATTAGTGCCTGCAACAGAACAACAAGGAACACACA	11	20	59	15	236	55	1519	555	506	831	857	820	2707	2251	1616	926	1424	702
miR-2029	GTTTGAGAGCGTAGTCAATACTGAACCTATTATCCGGATAGAAAGCACATAGTGTGGCATTTAGGTGATACGCAATCCCTAGGTTACCATGTCAGATGGTAAACTATGGATTGCGCTTCTCCTAACTTGCCTAACTGCAATGCTACAGCATGTACAAGCAGAAATTAGTGCCTGCAACAGAACAACAAGGAACACACAAAA	11	20	59	15	236	55	1519	555	506	831	857	820	2707	2251	1616	926	1424	702
miR-2029	TAGAATGGCTGACAAGTAAAGCTTACAGTAGTTTGAGAGCGTAGTCAATACTGAACCTATTATCCGGATAGAAAGCACATAGTGTGGCATTTAGGTGATACGCAATCCCTAGGTTACCATGTCAGATGGTAAACTATGGATTGCGCTTCTCCTAACTTGCCTAACTGCAATGCTACAGCATGTACAAGCAGAAATTAGTGC	11	20	59	15	236	55	1519	555	506	831	857	820	2707	2251	1616	926	1424	702
miR-2029	TAGTTTGAGAGCGTAGTCAATACTGAACCTATTATCCGGATAGAAAGCACATAGTGTGGCATTTAGGTGATACGCAATCCCTAGGTTACCATGTCAGATGGTAAACTATGGATTGCGCTTCTCCTAACTTGCCTAACTGCAATGCTACAGCATGTACAAGCAGAAATTAGTGCCTGCAACAGAACAACAAGGAACACACAA	11	20	59	15	236	55	1519	555	506	831	857	820	2707	2251	1616	926	1424	702
miR-2029	TATAGAATGGCTGACAAGTAAAGCTTACAGTAGTTTGAGAGCGTAGTCAATACTGAACCTATTATCCGGATAGAAAGCACATAGTGTGGCATTTAGGTGATACGCAATCCCTAGGTTACCATGTCAGATGGTAAACTATGGATTGCGCTTCTCCTAACTTGCCTAACTGCAATGCTACAGCATGTACAAGCAGAAATTAGT	11	20	59	15	236	55	1519	555	506	831	857	820	2707	2251	1616	926	1424	702
miR-2027	AAGAGCAGCAGCAAGCCCCTAGTAATTGATGTATTCAGTTTGTTTTCAAACAAGATAGAGCTGCACACCTCAGATCTTTCAATCCGAGAGCCTTAAGGCTTGCTTGTTGGTAATTTTGCATCTGTTGCACATGCGATTTTACCAAAATGCAATTCTTATGGTTCAGTGATCAGGAACCCAATAACTGCAGCACAGTTGTCT	22	19	42	10	173	34	1652	274	444	439	712	444	1734	972	1714	433	2370	432
miR-2027	AGAGCAGCAGCAAGCCCCTAGTAATTGATGTATTCAGTTTGTTTTCAAACAAGATAGAGCTGCACACCTCAGATCTTTCAATCCGAGAGCCTTAAGGCTTGCTTGTTGGTAATTTTGCATCTGTTGCACATGCGATTTTACCAAAATGCAATTCTTATGGTTCAGTGATCAGGAACCCAATAACTGCAGCACAGTTGTCTG	22	19	42	10	173	34	1652	274	444	439	712	444	1734	972	1714	433	2370	432
miR-2027	AGCAGCAGCAAGCCCCTAGTAATTGATGTATTCAGTTTGTTTTCAAACAAGATAGAGCTGCACACCTCAGATCTTTCAATCCGAGAGCCTTAAGGCTTGCTTGTTGGTAATTTTGCATCTGTTGCACATGCGATTTTACCAAAATGCAATTCTTATGGTTCAGTGATCAGGAACCCAATAACTGCAGCACAGTTGTCTGAT	22	19	42	10	173	34	1652	274	444	439	712	444	1734	972	1714	433	2370	432
miR-2027	ATTCAGTTTGTTTTCAAACAAGATAGAGCTGCACACCTCAGATCTTTCAATCCGAGAGCCTTAAGGCTTGCTTGTTGGTAATTTTGCATCTGTTGCACATGCGATTTTACCAAAATGCAATTCTTATGGTTCAGTGATCAGGAACCCAATAACTGCAGCACAGTTGTCTGATATCGGTGCATGAAACTGATAGTCACTACA	22	19	42	10	173	34	1652	274	444	439	712	444	1734	972	1714	433	2370	432
miR-2027	GAGCAGCAGCAAGCCCCTAGTAATTGATGTATTCAGTTTGTTTTCAAACAAGATAGAGCTGCACACCTCAGATCTTTCAATCCGAGAGCCTTAAGGCTTGCTTGTTGGTAATTTTGCATCTGTTGCACATGCGATTTTACCAAAATGCAATTCTTATGGTTCAGTGATCAGGAACCCAATAACTGCAGCACAGTTGTCTGA	22	19	42	10	173	34	1652	274	444	439	712	444	1734	972	1714	433	2370	432
miR-2027	GATAGAGCTGCACACCTCAGATCTTTCAATCCGAGAGCCTTAAGGCTTGCTTGTTGGTAATTTTGCATCTGTTGCACATGCGATTTTACCAAAATGCAATTCTTATGGTTCAGTGATCAGGAACCCAATAACTGCAGCACAGTTGTCTGATATCGGTGCATGAAACTGATAGTCACTACAGTTTTTAAATTCATCTAATAT	22	19	42	10	173	34	1652	274	444	439	712	444	1734	972	1714	433	2370	432
miR-2027	GTATTCAGTTTGTTTTCAAACAAGATAGAGCTGCACACCTCAGATCTTTCAATCCGAGAGCCTTAAGGCTTGCTTGTTGGTAATTTTGCATCTGTTGCACATGCGATTTTACCAAAATGCAATTCTTATGGTTCAGTGATCAGGAACCCAATAACTGCAGCACAGTTGTCTGATATCGGTGCATGAAACTGATAGTCACTA	22	19	42	10	173	34	1652	274	444	439	712	444	1734	972	1714	433	2370	432
miR-2027	TATTCAGTTTGTTTTCAAACAAGATAGAGCTGCACACCTCAGATCTTTCAATCCGAGAGCCTTAAGGCTTGCTTGTTGGTAATTTTGCATCTGTTGCACATGCGATTTTACCAAAATGCAATTCTTATGGTTCAGTGATCAGGAACCCAATAACTGCAGCACAGTTGTCTGATATCGGTGCATGAAACTGATAGTCACTAC	22	19	42	10	173	34	1652	274	444	439	712	444	1734	972	1714	433	2370	432
miR-100	AACAACAACGTGCTTCCTACGAGGCCTATTGATGCAAGACTGGAGCCCGAATATAATCGCACAGTATCGACCCGTAGATCCGAACTTGTGGAGTTTCACCACAGGCTCGTTTCTACGGATCAAAACTGCGTCGAAATACACACAAAATGAAGAGTACAATGGCGAAGAACAAGGAAGGTCGTAAAAAGTGGGTTATATCAA	6	7	37	21	47	32	47	57	42	38	28	35	227	261	1485	984	1534	1078
miR-100	ACAACAACGTGCTTCCTACGAGGCCTATTGATGCAAGACTGGAGCCCGAATATAATCGCACAGTATCGACCCGTAGATCCGAACTTGTGGAGTTTCACCACAGGCTCGTTTCTACGGATCAAAACTGCGTCGAAATACACACAAAATGAAGAGTACAATGGCGAAGAACAAGGAAGGTCGTAAAAAGTGGGTTATATCAAG	6	7	37	21	47	32	47	57	42	38	28	35	227	261	1485	984	1534	1078
miR-100	ACAGGCGTGATGCCGGCTTCAGGCGTGCTACAACAACAACGTGCTTCCTACGAGGCCTATTGATGCAAGACTGGAGCCCGAATATAATCGCACAGTATCGACCCGTAGATCCGAACTTGTGGAGTTTCACCACAGGCTCGTTTCTACGGATCAAAACTGCGTCGAAATACACACAAAATGAAGAGTACAATGGCGAAGAAC	6	7	37	21	47	32	47	57	42	38	28	35	227	261	1485	984	1534	1078
miR-100	AGGCGTGATGCCGGCTTCAGGCGTGCTACAACAACAACGTGCTTCCTACGAGGCCTATTGATGCAAGACTGGAGCCCGAATATAATCGCACAGTATCGACCCGTAGATCCGAACTTGTGGAGTTTCACCACAGGCTCGTTTCTACGGATCAAAACTGCGTCGAAATACACACAAAATGAAGAGTACAATGGCGAAGAACAA	6	7	37	21	47	32	47	57	42	38	28	35	227	261	1485	984	1534	1078
miR-100	CAACAACGTGCTTCCTACGAGGCCTATTGATGCAAGACTGGAGCCCGAATATAATCGCACAGTATCGACCCGTAGATCCGAACTTGTGGAGTTTCACCACAGGCTCGTTTCTACGGATCAAAACTGCGTCGAAATACACACAAAATGAAGAGTACAATGGCGAAGAACAAGGAAGGTCGTAAAAAGTGGGTTATATCAAGC	6	7	37	21	47	32	47	57	42	38	28	35	227	261	1485	984	1534	1078
miR-100	CAGGCGTGATGCCGGCTTCAGGCGTGCTACAACAACAACGTGCTTCCTACGAGGCCTATTGATGCAAGACTGGAGCCCGAATATAATCGCACAGTATCGACCCGTAGATCCGAACTTGTGGAGTTTCACCACAGGCTCGTTTCTACGGATCAAAACTGCGTCGAAATACACACAAAATGAAGAGTACAATGGCGAAGAACA	6	7	37	21	47	32	47	57	42	38	28	35	227	261	1485	984	1534	1078
miR-100	TAAAGTATGTTTCCTTCGTTACAGGCGTGATGCCGGCTTCAGGCGTGCTACAACAACAACGTGCTTCCTACGAGGCCTATTGATGCAAGACTGGAGCCCGAATATAATCGCACAGTATCGACCCGTAGATCCGAACTTGTGGAGTTTCACCACAGGCTCGTTTCTACGGATCAAAACTGCGTCGAAATACACACAAAATGA	6	6	37	21	47	32	47	57	42	38	28	35	227	261	1485	984	1535	1077
miR-2036	ATGTAATGTAGCTCTTTGGTCAGAACCAGATAGGGCCCCGTCACGTGTGCGACACGCCGATCTTTGAGACGTCAGATGCAATAAGAGTCGTGCCAGGACCCGGTGAGAACGTACAGTAAGCACTTGACGATGTATATTGTACGACTCTCATCGTATCCTGCACGGCAATGAACACGGAACATGATGCCACGGCACGTCACG	3	11	22	14	35	42	488	213	132	198	337	335	597	666	839	743	1135	1066
miR-2036	CCCCGTCACGTGTGCGACACGCCGATCTTTGAGACGTCAGATGCAATAAGAGTCGTGCCAGGACCCGGTGAGAACGTACAGTAAGCACTTGACGATGTATATTGTACGACTCTCATCGTATCCTGCACGGCAATGAACACGGAACATGATGCCACGGCACGTCACGACACGGTAAAGAACACGGAACATCATGGCAAGGCA	3	11	22	14	35	42	488	213	132	198	337	335	597	666	839	743	1135	1066
miR-2036	GCCCCGTCACGTGTGCGACACGCCGATCTTTGAGACGTCAGATGCAATAAGAGTCGTGCCAGGACCCGGTGAGAACGTACAGTAAGCACTTGACGATGTATATTGTACGACTCTCATCGTATCCTGCACGGCAATGAACACGGAACATGATGCCACGGCACGTCACGACACGGTAAAGAACACGGAACATCATGGCAAGGC	3	11	22	14	35	42	488	213	132	198	337	335	597	666	839	743	1135	1066
miR-2036	GGCCCCGTCACGTGTGCGACACGCCGATCTTTGAGACGTCAGATGCAATAAGAGTCGTGCCAGGACCCGGTGAGAACGTACAGTAAGCACTTGACGATGTATATTGTACGACTCTCATCGTATCCTGCACGGCAATGAACACGGAACATGATGCCACGGCACGTCACGACACGGTAAAGAACACGGAACATCATGGCAAGG	3	11	22	14	35	42	488	213	132	198	337	335	597	666	839	743	1135	1066
miR-2036	GGGCCCCGTCACGTGTGCGACACGCCGATCTTTGAGACGTCAGATGCAATAAGAGTCGTGCCAGGACCCGGTGAGAACGTACAGTAAGCACTTGACGATGTATATTGTACGACTCTCATCGTATCCTGCACGGCAATGAACACGGAACATGATGCCACGGCACGTCACGACACGGTAAAGAACACGGAACATCATGGCAAG	3	11	22	14	35	42	488	213	132	198	337	335	597	666	839	743	1135	1066
miR-9412	AAAATTGGTTAGATTATAAATGGCTTGATGAAAAGATTGTTATGAAAGATATAATAAATAGTTGTTTTCACTCTTTCATGAACAACCTGAGGGCCAAGATGAATGCTAAAGACTGGAAGACATGGGAATTAAAAACCATGTCTTGAAGAGAACAGTAGAGAGTTCTTATTCACTAGTCATTTGGTACCCCCACATCCATGG	105	134	103	101	423	533	612	490	279	353	305	338	509	539	133	135	186	240
miR-9412	AAATTGGTTAGATTATAAATGGCTTGATGAAAAGATTGTTATGAAAGATATAATAAATAGTTGTTTTCACTCTTTCATGAACAACCTGAGGGCCAAGATGAATGCTAAAGACTGGAAGACATGGGAATTAAAAACCATGTCTTGAAGAGAACAGTAGAGAGTTCTTATTCACTAGTCATTTGGTACCCCCACATCCATGGT	105	134	103	101	423	533	612	490	279	353	305	338	509	539	133	135	186	240
miR-9412	AATAAATGTGAAAAATTAGTTAGATTATAAATGGCTTGATGAAAAGATTGTTTTGAAAGATATAATAAATAATTGTTTTCACTCTTTCATGAACCAGGAACTACCTGAGGGCCAAGATGAATGCTAAAGACTGGAAGACATGGGAATTAAAAACCATGTCTTGAAGAGAACAGTAAGGGAGTTCTTATTCACTAGTCATTT	110	135	107	106	430	534	616	499	280	354	306	339	510	539	134	135	189	242
miR-9412	AATAGTTGTGGAAAATTAGTTAGATTATAAATGGCTTGATGAAAAGATTGTTTTGAAAGATATAATAAATAATTGTTTTCACTCTTTCATGAACCAGGAACTACCTGAGGGCCAAGATGAATGCTAAAGACTGGAAGACATGGGAATTAAAAACCATGTCTTGAAAAGAACAGTAGGGAGTTCTTATTCACTAGTCATTTG	108	135	106	105	430	533	612	499	280	354	306	339	510	539	134	133	189	240
miR-9412	AATAGTTGTGGAAAATTGGTTAGATTATAAATGGCTTGATGAAAAGATTGTTTTGAAAGATATAATAAATAATTGTTTTCACTCTTTCATGAACCAGGAACTACCTGAGGGCCAAGATGAATGCTAAAGACTGGAAGACATGGGAATTAAAAACCATGTCTTGAAGAGAACAGTAGAGAGTTCTTATTCACTAGTCATTTG	103	133	104	102	423	533	613	490	277	353	306	337	509	538	134	135	185	240
miR-9412	AATAGTTGTGGAAAATTAGTTAGATTATAAATGGCTTGATTAAAAGATTGTTTTGAAAGATATAATAAATAATTGTTTTCACTCTTTCATGAACCAGGAACTACCTGAGGGCCAAGATGAATGCTAAAGACTGGAAGACATGGGAATTAAAAACCATGTCTTGAAGAGAACAGTAGGGAGTTCTTATTCACTAGTTATTTG	103	133	104	105	425	534	613	490	278	353	306	336	509	539	134	135	186	241
miR-9412	AATAGTTGTGGAAAATTAGTTAGATTATAAATGGCTTGATAAAAAGGTTGTTTTGAAAGAAATAATAAATAATTGTTTTCACTCTTTTATGAACCAGGAACTACCTGAGGGCCAAGATGAATGCTAAAGACTGGAAGACATGGGAATTAAAAACCATGTCTTGAAAAGAACAGTAGGATGTTCTTATTCACTAGTCATTTG	106	134	108	105	423	536	612	494	278	354	307	336	510	538	133	133	186	239
miR-9412	AATTAGTTAGATTATAAATGGCTTGATGAAAAGATTGTTTTGAAAGATATAATAAATAATTGTTTTCACTCTTTCATGAACCAGGAACTACTTGAGGGCCAAGATGAATGCTAAAGACTGGAAGACATGGGAATTAAAAACCATGTCTTGAAGAGAACAGAAGGGAGTTCTTATTCACTAGTCATTTGGTACCCCCAAATC	112	135	108	107	431	535	612	500	280	354	306	340	510	539	134	136	189	243
miR-9412	AATTAGTTAGATTATAAATGGCTTGATAAAAAGGTTGTTTTGAAAGAAATAATAAATAATTGTTTTCACTCTTTTATGAACCAGGAACTACCTGAGGGCCAAGATGAATGCTAAAGACTGGAAGACATGGGAATTAAAAACCATGTCTTGAAAAGAACAGTAGGATGTTCTTATTCACTAGTCATTTGATACCCCCACACC	108	139	116	111	423	543	617	502	285	356	309	338	510	540	135	133	187	242
miR-9412	AATTAGTTAGATTATAAATGGCTTGATGAAAAGATTGTTTTGAAAGATATAATAAATAATTGTTTTCACTCTTTCATGAACCAGGAACTACCTGAGGGCCAAGATGAATGCTAAAGACTGGAAGACATGGGAATTAAAAACCATGTCTTGAAGAGAACAGTAAGGGAGTTCTTATTCACTAGTCATTTCGTACCCCCACAT	110	135	107	106	430	534	616	499	280	354	306	339	510	539	134	135	189	242
miR-9412	AATTAGTTAGATTATAAATGGCTTGATTAAAAGATTGTTTTGAAAGATATAATAAATAATTGTTTTCACTCTTTCATGAACCAGGAACTACCTGAGGGCCAAGATGAATGCTAAAGACTGGAAGACATGGGAATTAAAAACCATGTCTTGAAGAGAACAGTAGGGAGTTCTTATTCACTAGTTATTTGGTACCCCCCACAT	103	133	104	105	425	534	613	490	278	353	306	336	509	539	134	135	186	241
miR-9412	AATTAGTTAGATTATAAATGGCTTGATGAAAAGATTGTTTTGAAAGATATAATAAATAATTGTTTTCACTCTTTCATGTACCAGGAACTACTTGAGGGCCAAGATGAATGCTAAAGACTGGAAGACATGGGAATTAAAAACCATGTCTTGAAGAGAACAGAAGGGAGTTCTTATTCACTAGTCATTTGGTACCCCCACATC	113	136	108	107	431	535	612	500	282	354	306	340	510	539	134	136	190	243
miR-9412	AATTGGTTAGATTATAAATGGCTTGATGAAAAGATTGTTTTGAAAGATATAATAAATAATTGTTTTCACTCTTTCATGAACCAGGAACTACCTGAGGGCCAAGATGAATGCTAAAGACTGGAAGACATGGGAATTAAAAACCATGTCTTGAAGAGAACAGTAGAGAGTTCTTATTCACTAGTCATTTGGTACCCCCACATC	105	134	104	102	423	533	613	490	279	353	306	338	509	538	134	135	186	240
miR-9412	AATTGGTTAGATTATAAATGGCTTGATGAAAAGATTGTTATGAAAGATATAATAAATAGTTGTTTTCACTCTTTCATGAACAACCTGAGGGCCAAGATGAATGCTAAAGACTGGAAGACATGGGAATTAAAAACCATGTCTTGAAGAGAACAGTAGAGAGTTCTTATTCACTAGTCATTTGGTACCCCCACATCCATGGTT	105	134	103	101	423	533	612	490	279	353	305	338	509	539	133	135	186	240
miR-9412	AGTTAGATTATAAATGGCTTGATGAAAAGATTGTTTTGAAAGATATAATAAATAATTGTTTTCACTCTTTCATGTACCAGGAACTACTTGAGGGCCAAGATGAATGCTAAAGACTGGAAGACATGGGAATTAAAAACCATGTCTTGAAGAGAACAGAAGGGAGTTCTTATTCACTAGTCATTTGGTACCCCCACATCCATG	113	136	108	107	431	535	612	500	282	354	306	340	510	540	134	136	190	243
miR-9412	AGTTAGATTATAAATGGCTTGATAAAAAGGTTGTTTTGAAAGAAATAATAAATAATTGTTTTCACTCTTTTATGAACCAGGAACTACCTGAGGGCCAAGATGAATGCTAAAGACTGGAAGACATGGGAATTAAAAACCATGTCTTGAAAAGAACAGTAGGATGTTCTTATTCACTAGTCATTTGATACCCCCACACCCATC	108	140	117	111	425	543	618	503	285	356	309	339	510	540	135	133	187	242
miR-9412	AGTTAGATTATAAATGGCTTGATAAAAAGGTTGTTTTGAAAGAAATAATAAATAATTGTTTTCACTCTTTTATGAACCAGGAACTACCTGAGGGCCAAGATGAATGCTAAAGACTGGAAGACATGGGAATTAAAAACCATGTCTTGAAAAGAACAGTAGGATGTTCTTATTCACTAGTCATTTGATACCCCCACACCCATG	108	140	117	111	425	543	618	503	285	356	309	339	510	540	135	133	187	242
miR-9412	AGTTAGATTATAAATGGCTTGATGAAAAGATTGTTTTGAAAGATATAATAAATAATTGTTTTCACTCTTTCATGAACCAGGAACTACTTGAGGGCCAAGATGAATGCTAAAGACTGGAAGACATGGGAATTAAAAACCATGTCTTGAAGAGAACAGAAGGGAGTTCTTATTCACTAGTCATTTGGTACCCCCAAATCCATG	112	135	108	108	431	535	612	500	280	354	306	340	510	540	134	136	189	243
miR-9412	AGTTAGATTATAAATGGCTTGATGAAAAGATTGTTTTGAAAGATATAATAAATAATTGTTTTCACTCTTTCATGAACCAGGAACTACCTGAGGGCCAAGATGAATGCTAAAGACTGGAAGACATGGGAATTAAAAACCATGTCTTGAAGAGAACAGTAAGGGAGTTCTTATTCACTAGTCATTTCGTACCCCCACATCCAT	110	135	107	106	430	534	616	499	280	354	306	339	510	539	134	135	189	242
miR-9412	AGTTAGATTATAAATGGCTTGATTAAAAGATTGTTTTGAAAGATATAATAAATAATTGTTTTCACTCTTTCATGAACCAGGAACTACCTGAGGGCCAAGATGAATGCTAAAGACTGGAAGACATGGGAATTAAAAACCATGTCTTGAAGAGAACAGTAGGGAGTTCTTATTCACTAGTTATTTGGTACCCCCCACATCCAT	103	133	104	105	425	534	613	490	278	353	306	336	509	539	134	135	186	241
miR-9412	ATAAATGGCTTGATGAAAAGATTGTTTTGAAAGATATAATAAATAATTGTTTTCACTCTTTCATGAACCAGGAACTACCTGAGGGCCAAGATGAATGCTAAAGACTGGAAGACATGGGAATTAAAAACCATGTCTTGAAGAGAACAGTAGAGAGTTCTTATTCACTAGTCATTTGGTACCCCCACATCCATGGTTCCAGGA	105	134	104	102	423	533	613	490	279	353	306	337	509	539	134	135	186	240
miR-9412	ATAAATGGCTTGATGAAAAGATTGTTTTGAAAGATATAATAAATAATTGTTTTCACTCTTTCATGAACCAGGAACTACTTGAGGGCCAAGATGAATGCTAAAGACTGGAAGACATGGGAATTAAAAACCATGTCTTGAAGAGAACAGAAGGGAGTTCTTATTCACTAGTCATTTGGTACCCCCAAATCCATGGTCCCAGGA	112	135	108	108	431	535	612	500	280	354	306	339	510	540	134	136	189	243
miR-9412	ATAAATGGCTTGATTAAAAGATTGTTTTGAAAGATATAATAAATAATTGTTTTCACTCTTTCATGAACCAGGAACTACCTGAGGGCCAAGATGAATGCTAAAGACTGGAAGACATGGGAATTAAAAACCATGTCTTGAAGAGAACAGTAGGGAGTTCTTATTCACTAGTTATTTGGTACCCCCCACATCCATGGTTCCAGG	103	133	104	105	425	534	613	490	278	353	306	336	509	539	134	135	186	241
miR-9412	ATAAATGGCTTGATAAAAAGGTTGTTTTGAAAGAAATAATAAATAATTGTTTTCACTCTTTTATGAACCAGGAACTACCTGAGGGCCAAGATGAATGCTAAAGACTGGAAGACATGGGAATTAAAAACCATGTCTTGAAAAGAACAGTAGGATGTTCTTATTCACTAGTCATTTGATACCCCCACACCCATCGTCCCAGGG	108	140	117	111	425	543	617	503	285	356	309	339	510	540	135	133	187	242
miR-9412	ATAAATGGCTTGATGAAAAGATTGTTTTGAAAGATATAATAAATAATTGTTTTCACTCTTTCATGAACCAGGAACTACCTGAGGGCCAAGATGAATGCTAAAGACTGGAAGACATGGGAATTAAAAACCATGTCTTGAAGAGAACAGTAAGGGAGTTCTTATTCACTAGTCATTTCGTACCCCCACATCCATGGTTCCAGA	110	135	107	106	430	534	616	499	280	354	306	338	510	539	134	135	189	242
miR-9412	ATAAATGGCTTGATGAAAAGATTGTTTTGAAAGATATAATAAATAATTGTTTTCACTCTTTCATGTACCAGGAACTACTTGAGGGCCAAGATGAATGCTAAAGACTGGAAGACATGGGAATTAAAAACCATGTCTTGAAGAGAACAGAAGGGAGTTCTTATTCACTAGTCATTTGGTACCCCCACATCCATGGTCCCAGGA	113	136	108	107	431	535	612	500	282	354	306	339	510	540	134	136	190	243
miR-9412	ATAAATGGCTTGATAAAAAGGTTGTTTTGAAAGAAATAATAAATAATTGTTTTCACTCTTTTATGAACCAGGAACTACCTGAGGGCCAAGATGAATGCTAAAGACTGGAAGACATGGGAATTAAAAACCATGTCTTGAAAAGAACAGTAGGATGTTCTTATTCACTAGTCATTTGATACCCCCACACCCATGGTCCCAGGG	108	140	117	111	425	543	617	503	285	356	309	339	510	540	135	133	187	242
miR-9412	ATTAGTTAGATTATAAATGGCTTGATTAAAAGATTGTTTTGAAAGATATAATAAATAATTGTTTTCACTCTTTCATGAACCAGGAACTACCTGAGGGCCAAGATGAATGCTAAAGACTGGAAGACATGGGAATTAAAAACCATGTCTTGAAGAGAACAGTAGGGAGTTCTTATTCACTAGTTATTTGGTACCCCCCACATC	103	133	104	105	425	534	613	490	278	353	306	336	509	539	134	135	186	241
miR-9412	ATTAGTTAGATTATAAATGGCTTGATGAAAAGATTGTTTTGAAAGATATAATAAATAATTGTTTTCACTCTTTCATGTACCAGGAACTACTTGAGGGCCAAGATGAATGCTAAAGACTGGAAGACATGGGAATTAAAAACCATGTCTTGAAGAGAACAGAAGGGAGTTCTTATTCACTAGTCATTTGGTACCCCCACATCC	113	136	108	107	431	535	612	500	282	354	306	340	510	539	134	136	190	243
miR-9412	ATTAGTTAGATTATAAATGGCTTGATAAAAAGGTTGTTTTGAAAGAAATAATAAATAATTGTTTTCACTCTTTTATGAACCAGGAACTACCTGAGGGCCAAGATGAATGCTAAAGACTGGAAGACATGGGAATTAAAAACCATGTCTTGAAAAGAACAGTAGGATGTTCTTATTCACTAGTCATTTGATACCCCCACACCC	108	140	116	111	424	543	618	503	285	356	309	339	510	540	135	133	187	242
miR-9412	ATTAGTTAGATTATAAATGGCTTGATGAAAAGATTGTTTTGAAAGATATAATAAATAATTGTTTTCACTCTTTCATGAACCAGGAACTACCTGAGGGCCAAGATGAATGCTAAAGACTGGAAGACATGGGAATTAAAAACCATGTCTTGAAGAGAACAGTAAGGGAGTTCTTATTCACTAGTCATTTCGTACCCCCACATC	110	135	107	106	430	534	616	499	280	354	306	339	510	539	134	135	189	242
miR-9412	ATTAGTTAGATTATAAATGGCTTGATGAAAAGATTGTTTTGAAAGATATAATAAATAATTGTTTTCACTCTTTCATGAACCAGGAACTACTTGAGGGCCAAGATGAATGCTAAAGACTGGAAGACATGGGAATTAAAAACCATGTCTTGAAGAGAACAGAAGGGAGTTCTTATTCACTAGTCATTTGGTACCCCCAAATCC	112	135	108	108	431	535	612	500	280	354	306	340	510	540	134	136	189	243
miR-9412	ATTGGTTAGATTATAAATGGCTTGATGAAAAGATTGTTTTGAAAGATATAATAAATAATTGTTTTCACTCTTTCATGAACCAGGAACTACCTGAGGGCCAAGATGAATGCTAAAGACTGGAAGACATGGGAATTAAAAACCATGTCTTGAAGAGAACAGTAGAGAGTTCTTATTCACTAGTCATTTGGTACCCCCACATCC	105	134	104	102	423	533	613	490	279	353	306	338	509	538	134	135	186	240
miR-9412	ATTGTTTTGAAAGATATAATAAATAATTGTTTTCACTCTTTCATGAACCAGGAACTACCTGAGGGCCAAGATGAATGCTAAAGACTGGAAGACATGGGAATTAAAAACCATGTCTTGAAGAGAACAGTAGGGAGTTCTTATTCACTAGTTATTTGGTACCCCCCACATCCATGGTTCCAGGAAAGGGTGGGGGATTAGACT	103	133	104	105	425	534	613	490	278	353	306	336	509	539	134	135	186	241
miR-9412	CTCATGTGTTTATTTTTTTTCAAATAGTTGTGGAAAATTAGTTAGATTATAAATGGCTTGATAAAAAGATTGTTTTGAAAAGAATTATAATTAAAAATTCTTTTCACTCTTTTATGAACCAGGAACTACCTGGCCAAGATGAATGCTAAAGACTGGAAGACATGAGAAAAAATCATGTCTTGAAGAGAACAGTAGGATGTT	121	159	121	123	621	747	763	609	357	438	383	429	704	682	210	204	319	400
miR-9412	GAAAATTGGTTAGATTATAAATGGCTTGATGAAAAGATTGTTATGAAAGATATAATAAATAGTTGTTTTCACTCTTTCATGAACAACCTGAGGGCCAAGATGAATGCTAAAGACTGGAAGACATGGGAATTAAAAACCATGTCTTGAAGAGAACAGTAGAGAGTTCTTATTCACTAGTCATTTGGTACCCCCACATCCATG	105	134	103	101	423	533	612	490	279	353	305	338	509	539	133	135	186	240
miR-9412	GGAAAATTGGTTAGATTATAAATGGCTTGATGAAAAGATTGTTATGAAAGATATAATAAATAGTTGTTTTCACTCTTTCATGAACAACCTGAGGGCCAAGATGAATGCTAAAGACTGGAAGACATGGGAATTAAAAACCATGTCTTGAAGAGAACAGTAGAGAGTTCTTATTCACTAGTCATTTGGTACCCCCACATCCAT	105	134	103	101	423	533	612	490	279	353	305	338	509	539	133	135	186	240
miR-9412	GGTTAGATTATAAATGGCTTGATGAAAAGATTGTTTTGAAAGATATAATAAATAATTGTTTTCACTCTTTCATGAACCAGGAACTACCTGAGGGCCAAGATGAATGCTAAAGACTGGAAGACATGGGAATTAAAAACCATGTCTTGAAGAGAACAGTAGAGAGTTCTTATTCACTAGTCATTTGGTACCCCCACATCCATG	105	134	104	102	423	533	613	490	279	353	306	338	509	539	134	135	186	240
miR-9412	GTGGAAAATTGGTTAGATTATAAATGGCTTGATGAAAAGATTGTTATGAAAGATATAATAAATAGTTGTTTTCACTCTTTCATGAACAACCTGAGGGCCAAGATGAATGCTAAAGACTGGAAGACATGGGAATTAAAAACCATGTCTTGAAGAGAACAGTAGAGAGTTCTTATTCACTAGTCATTTGGTACCCCCACATCC	105	134	103	101	423	533	612	490	279	353	305	338	509	538	133	135	186	240
miR-9412	GTTAGATTATAAATGGCTTGATGAAAAGATTGTTTTGAAAGATATAATAAATAATTGTTTTCACTCTTTCATGTACCAGGAACTACTTGAGGGCCAAGATGAATGCTAAAGACTGGAAGACATGGGAATTAAAAACCATGTCTTGAAGAGAACAGAAGGGAGTTCTTATTCACTAGTCATTTGGTACCCCCACATCCATGG	113	136	108	107	431	535	612	500	282	354	306	340	510	540	134	136	190	243
miR-9412	GTTAGATTATAAATGGCTTGATGAAAAGATTGTTTTGAAAGATATAATAAATAATTGTTTTCACTCTTTCATGAACCAGGAACTACCTGAGGGCCAAGATGAATGCTAAAGACTGGAAGACATGGGAATTAAAAACCATGTCTTGAAGAGAACAGTAGAGAGTTCTTATTCACTAGTCATTTGGTACCCCCACATCCATGG	105	134	104	102	423	533	613	490	279	353	306	338	509	539	134	135	186	240
miR-9412	GTTAGATTATAAATGGCTTGATGAAAAGATTGTTATGAAAGATATAATAAATAGTTGTTTTCACTCTTTCATGAACAACCTGAGGGCCAAGATGAATGCTAAAGACTGGAAGACATGGGAATTAAAAACCATGTCTTGAAGAGAACAGTAGAGAGTTCTTATTCACTAGTCATTTGGTACCCCCACATCCATGGTTCCAGG	105	134	103	101	423	533	612	490	279	353	305	338	509	539	133	135	186	240
miR-9412	GTTAGATTATAAATGGCTTGATAAAAAGGTTGTTTTGAAAGAAATAATAAATAATTGTTTTCACTCTTTTATGAACCAGGAACTACCTGAGGGCCAAGATGAATGCTAAAGACTGGAAGACATGGGAATTAAAAACCATGTCTTGAAAAGAACAGTAGGATGTTCTTATTCACTAGTCATTTGATACCCCCACACCCATCG	108	140	117	111	425	543	618	503	285	356	309	339	510	540	135	133	187	242
miR-9412	GTTAGATTATAAATGGCTTGATGAAAAGATTGTTTTGAAAGATATAATAAATAATTGTTTTCACTCTTTCATGAACCAGGAACTACTTGAGGGCCAAGATGAATGCTAAAGACTGGAAGACATGGGAATTAAAAACCATGTCTTGAAGAGAACAGAAGGGAGTTCTTATTCACTAGTCATTTGGTACCCCCAAATCCATGG	112	135	108	108	431	535	612	500	280	354	306	340	510	540	134	136	189	243
miR-9412	GTTAGATTATAAATGGCTTGATAAAAAGGTTGTTTTGAAAGAAATAATAAATAATTGTTTTCACTCTTTTATGAACCAGGAACTACCTGAGGGCCAAGATGAATGCTAAAGACTGGAAGACATGGGAATTAAAAACCATGTCTTGAAAAGAACAGTAGGATGTTCTTATTCACTAGTCATTTGATACCCCCACACCCATGG	108	140	117	111	425	543	618	503	285	356	309	339	510	540	135	133	187	242
miR-9412	GTTAGATTATAAATGGCTTGATGAAAAGATTGTTTTGAAAGATATAATAAATAATTGTTTTCACTCTTTCATGAACCAGGAACTACCTGAGGGCCAAGATGAATGCTAAAGACTGGAAGACATGGGAATTAAAAACCATGTCTTGAAGAGAACAGTAAGGGAGTTCTTATTCACTAGTCATTTCGTACCCCCACATCCATG	110	135	107	106	430	534	616	499	280	354	306	339	510	539	134	135	189	242
miR-9412	GTTAGATTATAAATGGCTTGATTAAAAGATTGTTTTGAAAGATATAATAAATAATTGTTTTCACTCTTTCATGAACCAGGAACTACCTGAGGGCCAAGATGAATGCTAAAGACTGGAAGACATGGGAATTAAAAACCATGTCTTGAAGAGAACAGTAGGGAGTTCTTATTCACTAGTTATTTGGTACCCCCCACATCCATG	103	133	104	105	425	534	613	490	278	353	306	336	509	539	134	135	186	241
miR-9412	GTTGTAGAAAATTAGTTAGATTATAAATGGCTTGATAAAAAGATTGTTTTGAAAGAAATAATAAATAATTGTTTTCACTCTTTTATGAACCAGGAACTAACTACCTGAGGGCCAAGATGAATGCTAAAGACTGGAAGACATGATAATTAAAAATCATGTCTTGAAGAGAACAGTAGGATGTTCTTATTCACTAGTCATTTG	107	136	112	110	433	548	617	501	287	354	307	340	509	542	135	134	189	243
miR-9412	TAGATTATAAATGGCTTGATAAAAAGGTTGTTTTGAAAGAAATAATAAATAATTGTTTTCACTCTTTTATGAACCAGGAACTACCTGAGGGCCAAGATGAATGCTAAAGACTGGAAGACATGGGAATTAAAAACCATGTCTTGAAAAGAACAGTAGGATGTTCTTATTCACTAGTCATTTGATACCCCCACACCCATCGTC	108	140	117	111	425	543	618	503	285	356	309	339	510	540	135	133	187	242
miR-9412	TAGATTATAAATGGCTTGATGAAAAGATTGTTTTGAAAGATATAATAAATAATTGTTTTCACTCTTTCATGAACCAGGAACTACCTGAGGGCCAAGATGAATGCTAAAGACTGGAAGACATGGGAATTAAAAACCATGTCTTGAAGAGAACAGTAGAGAGTTCTTATTCACTAGTCATTTGGTACCCCCACATCCATGGTT	105	134	104	102	423	533	613	490	279	353	306	338	509	539	134	135	186	240
miR-9412	TAGATTATAAATGGCTTGATGAAAAGATTGTTTTGAAAGATATAATAAATAATTGTTTTCACTCTTTCATGAACCAGGAACTACCTGAGGGCCAAGATGAATGCTAAAGACTGGAAGACATGGGAATTAAAAACCATGTCTTGAAGAGAACAGTAAGGGAGTTCTTATTCACTAGTCATTTCGTACCCCCACATCCATGGT	110	135	107	106	430	534	616	499	280	354	306	339	510	539	134	135	189	242
miR-9412	TAGATTATAAATGGCTTGATGAAAAGATTGTTTTGAAAGATATAATAAATAATTGTTTTCACTCTTTCATGAACCAGGAACTACTTGAGGGCCAAGATGAATGCTAAAGACTGGAAGACATGGGAATTAAAAACCATGTCTTGAAGAGAACAGAAGGGAGTTCTTATTCACTAGTCATTTGGTACCCCCAAATCCATGGTC	112	135	108	108	431	535	612	500	280	354	306	340	510	540	134	136	189	243
miR-9412	TAGATTATAAATGGCTTGATGAAAAGATTGTTTTGAAAGATATAATAAATAATTGTTTTCACTCTTTCATGTACCAGGAACTACTTGAGGGCCAAGATGAATGCTAAAGACTGGAAGACATGGGAATTAAAAACCATGTCTTGAAGAGAACAGAAGGGAGTTCTTATTCACTAGTCATTTGGTACCCCCACATCCATGGTC	113	136	108	107	431	535	612	500	282	354	306	340	510	540	134	136	190	243
miR-9412	TAGATTATAAATGGCTTGATTAAAAGATTGTTTTGAAAGATATAATAAATAATTGTTTTCACTCTTTCATGAACCAGGAACTACCTGAGGGCCAAGATGAATGCTAAAGACTGGAAGACATGGGAATTAAAAACCATGTCTTGAAGAGAACAGTAGGGAGTTCTTATTCACTAGTTATTTGGTACCCCCCACATCCATGGT	103	133	104	105	425	534	613	490	278	353	306	336	509	539	134	135	186	241
miR-9412	TAGATTATAAATGGCTTGATAAAAAGGTTGTTTTGAAAGAAATAATAAATAATTGTTTTCACTCTTTTATGAACCAGGAACTACCTGAGGGCCAAGATGAATGCTAAAGACTGGAAGACATGGGAATTAAAAACCATGTCTTGAAAAGAACAGTAGGATGTTCTTATTCACTAGTCATTTGATACCCCCACACCCATGGTC	108	140	117	111	425	543	618	503	285	356	309	339	510	540	135	133	187	242
miR-9412	TAGTTAGATTATAAATGGCTTGATGAAAAGATTGTTTTGAAAGATATAATAAATAATTGTTTTCACTCTTTCATGAACCAGGAACTACTTGAGGGCCAAGATGAATGCTAAAGACTGGAAGACATGGGAATTAAAAACCATGTCTTGAAGAGAACAGAAGGGAGTTCTTATTCACTAGTCATTTGGTACCCCCAAATCCAT	112	135	108	108	431	535	612	500	280	354	306	340	510	540	134	136	189	243
miR-9412	TAGTTAGATTATAAATGGCTTGATAAAAAGGTTGTTTTGAAAGAAATAATAAATAATTGTTTTCACTCTTTTATGAACCAGGAACTACCTGAGGGCCAAGATGAATGCTAAAGACTGGAAGACATGGGAATTAAAAACCATGTCTTGAAAAGAACAGTAGGATGTTCTTATTCACTAGTCATTTGATACCCCCACACCCAT	108	140	117	111	425	543	618	503	285	356	309	339	510	540	135	133	187	242
miR-9412	TATAAATGGCTTGATAAAAAGGTTGTTTTGAAAGAAATAATAAATAATTGTTTTCACTCTTTTATGAACCAGGAACTACCTGAGGGCCAAGATGAATGCTAAAGACTGGAAGACATGGGAATTAAAAACCATGTCTTGAAAAGAACAGTAGGATGTTCTTATTCACTAGTCATTTGATACCCCCACACCCATGGTCCCAGG	108	140	117	111	425	543	617	503	285	356	309	339	510	540	135	133	187	242
miR-9412	TATAAATGGCTTGATGAAAAGATTGTTTTGAAAGATATAATAAATAATTGTTTTCACTCTTTCATGAACCAGGAACTACTTGAGGGCCAAGATGAATGCTAAAGACTGGAAGACATGGGAATTAAAAACCATGTCTTGAAGAGAACAGAAGGGAGTTCTTATTCACTAGTCATTTGGTACCCCCAAATCCATGGTCCCAGG	112	135	108	108	431	535	612	500	280	354	306	339	510	540	134	136	189	243
miR-9412	TATAAATGGCTTGATTAAAAGATTGTTTTGAAAGATATAATAAATAATTGTTTTCACTCTTTCATGAACCAGGAACTACCTGAGGGCCAAGATGAATGCTAAAGACTGGAAGACATGGGAATTAAAAACCATGTCTTGAAGAGAACAGTAGGGAGTTCTTATTCACTAGTTATTTGGTACCCCCCACATCCATGGTTCCAG	103	133	104	105	425	534	613	490	278	353	306	336	509	539	134	135	186	241
miR-9412	TATAAATGGCTTGATGAAAAGATTGTTTTGAAAGATATAATAAATAATTGTTTTCACTCTTTCATGAACCAGGAACTACCTGAGGGCCAAGATGAATGCTAAAGACTGGAAGACATGGGAATTAAAAACCATGTCTTGAAGAGAACAGTAGAGAGTTCTTATTCACTAGTCATTTGGTACCCCCACATCCATGGTTCCAGG	105	134	104	102	423	533	613	490	279	353	306	337	509	539	134	135	186	240
miR-9412	TATAAATGGCTTGATAAAAAGGTTGTTTTGAAAGAAATAATAAATAATTGTTTTCACTCTTTTATGAACCAGGAACTACCTGAGGGCCAAGATGAATGCTAAAGACTGGAAGACATGGGAATTAAAAACCATGTCTTGAAAAGAACAGTAGGATGTTCTTATTCACTAGTCATTTGATACCCCCACACCCATCGTCCCAGG	108	140	117	111	425	543	617	503	285	356	309	339	510	540	135	133	187	242
miR-9412	TATAAATGGCTTGATGAAAAGATTGTTTTGAAAGATATAATAAATAATTGTTTTCACTCTTTCATGTACCAGGAACTACTTGAGGGCCAAGATGAATGCTAAAGACTGGAAGACATGGGAATTAAAAACCATGTCTTGAAGAGAACAGAAGGGAGTTCTTATTCACTAGTCATTTGGTACCCCCACATCCATGGTCCCAGG	113	136	108	107	431	535	612	500	282	354	306	339	510	540	134	136	190	243
miR-9412	TATAAATGGCTTGATGAAAAGATTGTTTTGAAAGATATAATAAATAATTGTTTTCACTCTTTCATGAACCAGGAACTACCTGAGGGCCAAGATGAATGCTAAAGACTGGAAGACATGGGAATTAAAAACCATGTCTTGAAGAGAACAGTAAGGGAGTTCTTATTCACTAGTCATTTCGTACCCCCACATCCATGGTTCCAG	110	135	107	106	430	534	616	499	280	354	306	338	510	539	134	135	189	242
miR-9412	TGGAAAATTGGTTAGATTATAAATGGCTTGATGAAAAGATTGTTATGAAAGATATAATAAATAGTTGTTTTCACTCTTTCATGAACAACCTGAGGGCCAAGATGAATGCTAAAGACTGGAAGACATGGGAATTAAAAACCATGTCTTGAAGAGAACAGTAGAGAGTTCTTATTCACTAGTCATTTGGTACCCCCACATCCA	105	134	103	101	423	533	612	490	279	353	305	338	509	539	133	135	186	240
miR-9412	TGGTTAGATTATAAATGGCTTGATGAAAAGATTGTTTTGAAAGATATAATAAATAATTGTTTTCACTCTTTCATGAACCAGGAACTACCTGAGGGCCAAGATGAATGCTAAAGACTGGAAGACATGGGAATTAAAAACCATGTCTTGAAGAGAACAGTAGAGAGTTCTTATTCACTAGTCATTTGGTACCCCCACATCCAT	105	134	104	102	423	533	613	490	279	353	306	338	509	539	134	135	186	240
miR-9412	TGTGGAAAATTGGTTAGATTATAAATGGCTTGATGAAAAGATTGTTATGAAAGATATAATAAATAGTTGTTTTCACTCTTTCATGAACAACCTGAGGGCCAAGATGAATGCTAAAGACTGGAAGACATGGGAATTAAAAACCATGTCTTGAAGAGAACAGTAGAGAGTTCTTATTCACTAGTCATTTGGTACCCCCACATC	105	134	103	101	423	533	612	490	279	353	305	338	509	538	133	135	186	240
miR-9412	TTAGATTATAAATGGCTTGATAAAAAGGTTGTTTTGAAAGAAATAATAAATAATTGTTTTCACTCTTTTATGAACCAGGAACTACCTGAGGGCCAAGATGAATGCTAAAGACTGGAAGACATGGGAATTAAAAACCATGTCTTGAAAAGAACAGTAGGATGTTCTTATTCACTAGTCATTTGATACCCCCACACCCATCGT	108	140	117	111	425	543	618	503	285	356	309	339	510	540	135	133	187	242
miR-9412	TTAGATTATAAATGGCTTGATTAAAAGATTGTTTTGAAAGATATAATAAATAATTGTTTTCACTCTTTCATGAACCAGGAACTACCTGAGGGCCAAGATGAATGCTAAAGACTGGAAGACATGGGAATTAAAAACCATGTCTTGAAGAGAACAGTAGGGAGTTCTTATTCACTAGTTATTTGGTACCCCCCACATCCATGG	103	133	104	105	425	534	613	490	278	353	306	336	509	539	134	135	186	241
miR-9412	TTAGATTATAAATGGCTTGATGAAAAGATTGTTTTGAAAGATATAATAAATAATTGTTTTCACTCTTTCATGTACCAGGAACTACTTGAGGGCCAAGATGAATGCTAAAGACTGGAAGACATGGGAATTAAAAACCATGTCTTGAAGAGAACAGAAGGGAGTTCTTATTCACTAGTCATTTGGTACCCCCACATCCATGGT	113	136	108	107	431	535	612	500	282	354	306	340	510	540	134	136	190	243
miR-9412	TTAGATTATAAATGGCTTGATGAAAAGATTGTTTTGAAAGATATAATAAATAATTGTTTTCACTCTTTCATGAACCAGGAACTACCTGAGGGCCAAGATGAATGCTAAAGACTGGAAGACATGGGAATTAAAAACCATGTCTTGAAGAGAACAGTAAGGGAGTTCTTATTCACTAGTCATTTCGTACCCCCACATCCATGG	110	135	107	106	430	534	616	499	280	354	306	339	510	539	134	135	189	242
miR-9412	TTAGATTATAAATGGCTTGATGAAAAGATTGTTATGAAAGATATAATAAATAGTTGTTTTCACTCTTTCATGAACAACCTGAGGGCCAAGATGAATGCTAAAGACTGGAAGACATGGGAATTAAAAACCATGTCTTGAAGAGAACAGTAGAGAGTTCTTATTCACTAGTCATTTGGTACCCCCACATCCATGGTTCCAGGA	105	134	103	101	423	533	612	490	279	353	305	338	509	539	133	135	186	240
miR-9412	TTAGATTATAAATGGCTTGATGAAAAGATTGTTTTGAAAGATATAATAAATAATTGTTTTCACTCTTTCATGAACCAGGAACTACTTGAGGGCCAAGATGAATGCTAAAGACTGGAAGACATGGGAATTAAAAACCATGTCTTGAAGAGAACAGAAGGGAGTTCTTATTCACTAGTCATTTGGTACCCCCAAATCCATGGT	112	135	108	108	431	535	612	500	280	354	306	340	510	540	134	136	189	243
miR-9412	TTAGATTATAAATGGCTTGATAAAAAGGTTGTTTTGAAAGAAATAATAAATAATTGTTTTCACTCTTTTATGAACCAGGAACTACCTGAGGGCCAAGATGAATGCTAAAGACTGGAAGACATGGGAATTAAAAACCATGTCTTGAAAAGAACAGTAGGATGTTCTTATTCACTAGTCATTTGATACCCCCACACCCATGGT	108	140	117	111	425	543	618	503	285	356	309	339	510	540	135	133	187	242
miR-9412	TTAGATTATAAATGGCTTGATGAAAAGATTGTTTTGAAAGATATAATAAATAATTGTTTTCACTCTTTCATGAACCAGGAACTACCTGAGGGCCAAGATGAATGCTAAAGACTGGAAGACATGGGAATTAAAAACCATGTCTTGAAGAGAACAGTAGAGAGTTCTTATTCACTAGTCATTTGGTACCCCCACATCCATGGT	105	134	104	102	423	533	613	490	279	353	306	338	509	539	134	135	186	240
miR-9412	TTAGTTAGATTATAAATGGCTTGATGAAAAGATTGTTTTGAAAGATATAATAAATAATTGTTTTCACTCTTTCATGAACCAGGAACTACTTGAGGGCCAAGATGAATGCTAAAGACTGGAAGACATGGGAATTAAAAACCATGTCTTGAAGAGAACAGAAGGGAGTTCTTATTCACTAGTCATTTGGTACCCCCAAATCCA	112	135	108	108	431	535	612	500	280	354	306	340	510	540	134	136	189	243
miR-9412	TTAGTTAGATTATAAATGGCTTGATGAAAAGATTGTTTTGAAAGATATAATAAATAATTGTTTTCACTCTTTCATGAACCAGGAACTACCTGAGGGCCAAGATGAATGCTAAAGACTGGAAGACATGGGAATTAAAAACCATGTCTTGAAGAGAACAGTAAGGGAGTTCTTATTCACTAGTCATTTCGTACCCCCACATCC	110	135	107	106	430	534	616	499	280	354	306	339	510	539	134	135	189	242
miR-9412	TTAGTTAGATTATAAATGGCTTGATGAAAAGATTGTTTTGAAAGATATAATAAATAATTGTTTTCACTCTTTCATGTACCAGGAACTACTTGAGGGCCAAGATGAATGCTAAAGACTGGAAGACATGGGAATTAAAAACCATGTCTTGAAGAGAACAGAAGGGAGTTCTTATTCACTAGTCATTTGGTACCCCCACATCCA	113	136	108	107	431	535	612	500	282	354	306	340	510	540	134	136	190	243
miR-9412	TTAGTTAGATTATAAATGGCTTGATTAAAAGATTGTTTTGAAAGATATAATAAATAATTGTTTTCACTCTTTCATGAACCAGGAACTACCTGAGGGCCAAGATGAATGCTAAAGACTGGAAGACATGGGAATTAAAAACCATGTCTTGAAGAGAACAGTAGGGAGTTCTTATTCACTAGTTATTTGGTACCCCCCACATCC	103	133	104	105	425	534	613	490	278	353	306	336	509	539	134	135	186	241
miR-9412	TTAGTTAGATTATAAATGGCTTGATAAAAAGGTTGTTTTGAAAGAAATAATAAATAATTGTTTTCACTCTTTTATGAACCAGGAACTACCTGAGGGCCAAGATGAATGCTAAAGACTGGAAGACATGGGAATTAAAAACCATGTCTTGAAAAGAACAGTAGGATGTTCTTATTCACTAGTCATTTGATACCCCCACACCCA	108	140	117	111	425	543	618	503	285	356	309	339	510	540	135	133	187	242
miR-9412	TTGGTTAGATTATAAATGGCTTGATGAAAAGATTGTTTTGAAAGATATAATAAATAATTGTTTTCACTCTTTCATGAACCAGGAACTACCTGAGGGCCAAGATGAATGCTAAAGACTGGAAGACATGGGAATTAAAAACCATGTCTTGAAGAGAACAGTAGAGAGTTCTTATTCACTAGTCATTTGGTACCCCCACATCCA	105	134	104	102	423	533	613	490	279	353	306	338	509	539	134	135	186	240
miR-9413	AGTATCAATGCGCATAATTTATTTTTGTTACATTTATTTTTTATCTTAAGACAAGATCAGCTGCTGAAACCATATCACTTATCACTTAATGGGTTATCCTAAAAGTGATCAGTGGTAAGGTTTCAGTAGCTGGTTACGCAGGTATCAGTGAGATCACACACCACAATCAAGGATGTCTTACTTTCTGTTGTTTTATTACCC	0	0	11	6	0	0	0	0	0	0	2	6	0	1	381	391	1	1
miR-9413	AGTATCAATGCGCATAATTTATTTTTGTTACATTTATTTTTTATCTTAAGACAAGATCAGCTGCTGAAACCATATCACTTATCACTTAATGGATTATCCTAAAAGTGATCAGTGGTAAGGTTTCAGTAGCTGGTTACGCAGGTATCAGTGAGATCACACACCACAATCAAGGATGTCTTACTTTCTGTTGTTTTATTACCC	0	0	11	6	0	0	0	0	0	0	2	6	0	1	378	391	1	1
miR-9413	CTTGTACAGCTAAATTTAAACAGCATTGTTAGTATCAATGCGCATAATTTATTTTTGTTACATTTATTTTTTATCTTAAGACAAGATCAGCTGCTGAAACCATATCACTTATCACTTAATGGATTATCCTAAAAGTGATCAGTGGTAAGGTTTCAGTAGCTGGTTACGCAGGTATCAGTGAGATCACACACCACAATCAAG	0	0	11	6	0	0	0	0	0	0	2	6	0	1	378	391	1	1
miR-9413	CTTGTACAGCTAAATTTAAACAGCATTGTTAGTATCAATGCGCATAATTTATTTTTGTTACATTTATTTTTTATCTTAAGACAAGATCAGCTGCTGAAACCATATCACTTATCACTTAATGGGTTATCCTAAAAGTGATCAGTGGTAAGGTTTCAGTAGCTGGTTACGCAGGTATCAGTGAGATCACACACCACAATCAAG	0	0	11	6	0	0	0	0	0	0	2	6	0	1	381	391	1	1
miR-9413	TAGTATCAATGCGCATAATTTATTTTTGTTACATTTATTTTTTATCTTAAGACAAGATCAGCTGCTGAAACCATATCACTTATCACTTAATGGATTATCCTAAAAGTGATCAGTGGTAAGGTTTCAGTAGCTGGTTACGCAGGTATCAGTGAGATCACACACCACAATCAAGGATGTCTTACTTTCTGTTGTTTTATTACC	0	0	11	6	0	0	0	0	0	0	2	6	0	1	378	391	1	1
miR-9413	TAGTATCAATGCGCATAATTTATTTTTGTTACATTTATTTTTTATCTTAAGACAAGATCAGCTGCTGAAACCATATCACTTATCACTTAATGGGTTATCCTAAAAGTGATCAGTGGTAAGGTTTCAGTAGCTGGTTACGCAGGTATCAGTGAGATCACACACCACAATCAAGGATGTCTTACTTTCTGTTGTTTTATTACC	0	0	11	6	0	0	0	0	0	0	2	6	0	1	381	391	1	1
miR-9414	AATAAGATAATCATATATCACTTTTGTTTTTATAGAGTCCGCTTTAATACACGAGTCCTATAAGTTTACATACTTCTCCCTTATTACACTGCTAATTTCCAACTTGATCTTCAATGAACTCTGCTAAGCAGAGCTGATTGAAGATCAAGCTGAAAATGACCCAGAGTTAGAGACAGAGGTTGCTGAAGACGAAGGAGGAAG	0	0	0	0	147	12	616	63	298	58	316	39	260	52	5	1	0	0
miR-9414	AGAGTCCGCTTTAATACACGAGTCCTATAAGTTTACATACTTCTCCCTTATTACACTGCTAATTTCCAACTTGATCTTCAATGAACTCTGCTAAGCAGAGCTGATTGAAGATCAAGCTGAAAATGACCCAGAGTTAGAGACAGAGGTTGCTGAAGACGAAGGAGGAAGAGCCAGAGAATGCAAGGCTTGCCGGAAAAGATG	0	0	0	0	147	12	616	63	298	58	316	39	260	52	5	1	0	0
miR-9414	ATAAGATAATCATATATCACTTTTGTTTTTATAGAGTCCGCTTTAATACACGAGTCCTATAAGTTTACATACTTCTCCCTTATTACACTGCTAATTTCCAACTTGATCTTCAATGAACTCTGCTAAGCAGAGCTGATTGAAGATCAAGCTGAAAATGACCCAGAGTTAGAGACAGAGGTTGCTGAAGACGAAGGAGGAAGA	0	0	0	0	147	12	616	63	298	58	316	39	260	52	5	1	0	0
miR-9414	ATAGAGTCCGCTTTAATACACGAGTCCTATAAGTTTACATACTTCTCCCTTATTACACTGCTAATTTCCAACTTGATCTTCAATGAACTCTGCTAAGCAGAGCTGATTGAAGATCAAGCTGAAAATGACCCAGAGTTAGAGACAGAGGTTGCTGAAGACGAAGGAGGAAGAGCCAGAGAATGCAAGGCTTGCCGGAAAAGA	0	0	0	0	147	12	616	63	298	58	316	39	260	52	5	1	0	0
miR-9414	CAATAAGATAATCATATATCACTTTTGTTTTTATAGAGTCCGCTTTAATACACGAGTCCTATAAGTTTACATACTTCTCCCTTATTACACTGCTAATTTCCAACTTGATCTTCAATGAACTCTGCTAAGCAGAGCTGATTGAAGATCAAGCTGAAAATGACCCAGAGTTAGAGACAGAGGTTGCTGAAGACGAAGGAGGAA	0	0	0	0	147	12	616	63	298	58	316	39	260	52	5	1	0	0
miR-9414	TAAGATAATCATATATCACTTTTGTTTTTATAGAGTCCGCTTTAATACACGAGTCCTATAAGTTTACATACTTCTCCCTTATTACACTGCTAATTTCCAACTTGATCTTCAATGAACTCTGCTAAGCAGAGCTGATTGAAGATCAAGCTGAAAATGACCCAGAGTTAGAGACAGAGGTTGCTGAAGACGAAGGAGGAAGAG	0	0	0	0	147	12	616	63	298	58	316	39	260	52	5	1	0	0
miR-9414	TAGAGTCCGCTTTAATACACGAGTCCTATAAGTTTACATACTTCTCCCTTATTACACTGCTAATTTCCAACTTGATCTTCAATGAACTCTGCTAAGCAGAGCTGATTGAAGATCAAGCTGAAAATGACCCAGAGTTAGAGACAGAGGTTGCTGAAGACGAAGGAGGAAGAGCCAGAGAATGCAAGGCTTGCCGGAAAAGAT	0	0	0	0	147	12	616	63	298	58	316	39	260	52	5	1	0	0
miR-9414	TATAGAGTCCGCTTTAATACACGAGTCCTATAAGTTTACATACTTCTCCCTTATTACACTGCTAATTTCCAACTTGATCTTCAATGAACTCTGCTAAGCAGAGCTGATTGAAGATCAAGCTGAAAATGACCCAGAGTTAGAGACAGAGGTTGCTGAAGACGAAGGAGGAAGAGCCAGAGAATGCAAGGCTTGCCGGAAAAG	0	0	0	0	147	12	616	63	298	58	316	39	260	52	5	1	0	0
miR-9415	AATGAGCTAATGATTTTTTTTAAAAAATCATGGGGCCGCGTTGTTTAGCAAATTTTTACCAATCGGGCCCTAAAAAGCATCGGAGTTGCCAAATAAACTCATACTTACCTGACGCGGGAGGTTTATCGTGACCAACGCGGTCCTCTTAGGGTGAGGCCATCTTATAAATCAAGAGAACAAAAAACACCGAAATCGAGCTAA	2	0	4	0	6	1	488	1	29	0	178	3	240	0	5	0	5	0
miR-9415	ATCGTAAAGATCGATTGGATACTTACCTGACGCGGGAGGTTTACCGAGATCTCCTGTGTCGTTGTCTTCTTGTTTTTTCAGGTTGATCAAGTCAAGTAGCGAAGTTCTGAAGTTCTGAAGTTTACAGTTTGAAGAGCGTCTTCCAATACCGACAGCGCCTGCGCAGTGGACAAGAATTATCTTCTCTGCCTGGCGAAGCCC	1	1	2	1	10	0	489	1	31	1	179	1	240	0	5	0	8	0
miR-9415	ATGAGCTAATGATTTTTTTTAAAAAATCATGGGGCCGCGTTGTTTAGCAAATTTTTACCAATCGGGCCCTAAAAAGCATCGGAGTTGCCAAATAAACTCATACTTACCTGACGCGGGAGGTTTATCGTGACCAACGCGGTCCTCTTAGGGTGAGGCCATCTTATAAATCAAGAGAACAAAAAACACCGAAATCGAGCTAAG	2	0	4	0	6	1	488	1	29	0	178	3	240	0	5	0	5	0
miR-9415	CGTAAAGATCGATTGGATACTTACCTGACGCGGGAGGTTTACCGAGATCTCCTGTGTCGTTGTCTTCTTGTTTTTTCAGGTTGATCAAGTCAAGTAGCGAAGTTCTGAAGTTCTGAAGTTTACAGTTTGAAGAGCGTCTTCCAATACCGACAGCGCCTGCGCAGTGGACAAGAATTATCTTCTCTGCCTGGCGAAGCCCTC	1	1	2	1	10	0	489	1	31	1	179	1	240	0	5	0	8	0
miR-9415	GAGCTAATGATTTTTTTTAAAAAATCATGGGGCCGCGTTGTTTAGCAAATTTTTACCAATCGGGCCCTAAAAAGCATCGGAGTTGCCAAATAAACTCATACTTACCTGACGCGGGAGGTTTATCGTGACCAACGCGGTCCTCTTAGGGTGAGGCCATCTTATAAATCAAGAGAACAAAAAACACCGAAATCGAGCTAAGGG	2	0	4	0	6	1	488	1	29	0	178	3	240	0	5	0	5	0
miR-9415	TCGTAAAGATCGATTGGATACTTACCTGACGCGGGAGGTTTACCGAGATCTCCTGTGTCGTTGTCTTCTTGTTTTTTCAGGTTGATCAAGTCAAGTAGCGAAGTTCTGAAGTTCTGAAGTTTACAGTTTGAAGAGCGTCTTCCAATACCGACAGCGCCTGCGCAGTGGACAAGAATTATCTTCTCTGCCTGGCGAAGCCCT	1	1	2	1	10	0	489	1	31	1	179	1	240	0	5	0	8	0
miR-9416	AGCAGTAACTACGTGATTCAAAGCCTTTAGACACGTCTTTCTCGTCAAAGGGGCTACTCAAACCTTGTACACGACATCTCGTAGTGCTCACGCATCATGCAAGAACACTACAAATTGTCGTGTACAAGGTTTGCATCATGCAAGAACACTACGAGATGTCGTGTATAATTTTTGACGACGAGTCGTTCCTAGTTTCCCTCC	0	0	11	0	0	0	0	0	0	0	2	0	0	0	298	143	0	1
miR-9416	ATCAGTAACTACGTTATTCAAAGCCTTTAGACACGTCTTTCTCGTCAAAGGGGCTTCTCAAACCTTGTACACGACATCTCGTAGTGCTCATGCATCATGCAAGAACACTACAAATTGTCGTGTACAAGGTTTGCATTATGCAAGAACACTACGAGATGTCGTGTACAAGGTTTGAAGCAGCGGCGTAGCCAGGATTTTCAA	0	0	11	0	0	0	0	0	0	0	2	0	0	0	301	145	0	1
miR-9416	ATCAGTAACTACGTTATTCAAAGCCTTTAGACACGTCTTTCTCGTCAAAGGGGCTTCTCAAACCTTGTACACGACATCTCGTAGTGCTCATGCATCATGCAAGAACACTACAAATTGTCGTGTACAAGGTTTGCATCATGCAAGAACACTACGAGATGTCGTGTACAAGGTTTGACGCAGCGGCGTAGCCAGGATTTTTAA	0	0	11	0	0	0	0	0	0	0	2	0	0	0	301	145	0	1
miR-9416	GCAGTAACTACGTGATTCAAAGCCTTTAGACACGTCTTTCTCGTCAAAGGGGCTACTCAAACCTTGTACACGACATCTCGTAGTGCTCACGCATCATGCAAGAACACTACAAATTGTCGTGTACAAGGTTTGCATCATGCAAGAACACTACGAGATGTCGTGTATAATTTTTGACGACGAGTCGTTCCTAGTTTCCCTCCA	0	0	11	0	0	0	0	0	0	0	2	0	0	0	298	143	0	1
miR-9416	TAGCAGTAACTACGTGATTCAAAGCCTTTAGACACGTCTTTCTCGTCAAAGGGGCTACTCAAACCTTGTACACGACATCTCGTAGTGCTCACGCATCATGCAAGAACACTACAAATTGTCGTGTACAAGGTTTGCATCATGCAAGAACACTACGAGATGTCGTGTATAATTTTTGACGACGAGTCGTTCCTAGTTTCCCTC	0	0	11	0	0	0	0	0	0	0	2	0	0	0	298	143	0	1
miR-9416	TATCAGTAACTACGTTATTCAAAGCCTTTAGACACGTCTTTCTCGTCAAAGGGGCTTCTCAAACCTTGTACACGACATCTCGTAGTGCTCATGCATCATGCAAGAACACTACAAATTGTCGTGTACAAGGTTTGCATTATGCAAGAACACTACGAGATGTCGTGTACAAGGTTTGAAGCAGCGGCGTAGCCAGGATTTTCA	0	0	11	0	0	0	0	0	0	0	2	0	0	0	301	145	0	1
miR-9416	TATCAGTAACTACGTTATTCAAAGCCTTTAGACACGTCTTTCTCGTCAAAGGGGCTTCTCAAACCTTGTACACGACATCTCGTAGTGCTCATGCATCATGCAAGAACACTACAAATTGTCGTGTACAAGGTTTGCATCATGCAAGAACACTACGAGATGTCGTGTACAAGGTTTGACGCAGCGGCGTAGCCAGGATTTTTA	0	0	11	0	0	0	0	0	0	0	2	0	0	0	301	145	0	1
miR-9416	TCAGTAACTACGTTATTCAAAGCCTTTAGACACGTCTTTCTCGTCAAAGGGGCTTCTCAAACCTTGTACACGACATCTCGTAGTGCTCATGCATCATGCAAGAACACTACAAATTGTCGTGTACAAGGTTTGCATCATGCAAGAACACTACGAGATGTCGTGTACAAGGTTTGACGCAGCGGCGTAGCCAGGATTTTTAAC	0	0	11	0	0	0	0	0	0	0	2	0	0	0	301	145	0	1
miR-9416	TCAGTAACTACGTTATTCAAAGCCTTTAGACACGTCTTTCTCGTCAAAGGGGCTTCTCAAACCTTGTACACGACATCTCGTAGTGCTCATGCATCATGCAAGAACACTACAAATTGTCGTGTACAAGGTTTGCATTATGCAAGAACACTACGAGATGTCGTGTACAAGGTTTGAAGCAGCGGCGTAGCCAGGATTTTCAAC	0	0	11	0	0	0	0	0	0	0	2	0	0	0	301	145	0	1
miR-9416	TCGTCAAAGGGGCTTCTCAAACCTTGTACACGACATCTCGTAGTGCTCATGCATCATGCAAGAACACTACAAATTGTCGTGTACAAGGTTTGCATTATGCAAGAACACTACGAGATGTCGTGTACAAGGTTTGAAGCAGCGGCGTAGCCAGGATTTTCAACAGGAGGATGCCCAAAAGGCCCTTTCAAGGCATTTTGTTCT	0	0	11	0	0	0	0	0	0	0	2	0	0	0	301	145	0	1
miR-9416	TCGTCAAAGGGGCTACTCAAACCTTGTACACGACATCTCGTAGTGCTCACGCATCATGCAAGAACACTACAAATTGTCGTGTACAAGGTTTGCATCATGCAAGAACACTACGAGATGTCGTGTATAATTTTTGACGACGAGTCGTTCCTAGTTTCCCTCCAAACCTTCGCGTCTTTGCCTCATACTTTCGTTTGCAGAATC	0	0	11	0	0	0	0	0	0	0	2	0	0	0	298	143	0	1
miR-9416	TCGTCAAAGGGGCTTCTCAAACCTTGTACACGACATCTCGTAGTGCTCATGCATCATGCAAGAACACTACAAATTGTCGTGTACAAGGTTTGCATCATGCAAGAACACTACGAGATGTCGTGTACAAGGTTTGACGCAGCGGCGTAGCCAGGATTTTTAACAGGAGGATGCCCAAAAGGCCCTTTCAAGGCATTTTGTTCT	0	0	11	0	0	0	0	0	0	0	2	0	0	0	301	145	0	1
miR-2037	AAATGGAATCGGTTCTTATGGCGCCCGTGGTAAATGATTCATGAGATGGAGCTAGGTCTTGGTCACCGTGGTAAAAGCCGTCCAAGCACCCTCTTGGCAGTGTGATTGGAGACTTTTACCGTGGTCTGAGATCAGTCATACCCGGCGAACTGCGTAGCACGCACCACGTGATCATCAAAAGATTCCAAGAAAGATAAGTTT	0	3	2	1	1	2	21	9	1	12	21	24	89	66	275	142	188	119
miR-2037	AATGGAATCGGTTCTTATGGCGCCCGTGGTAAATGATTCATGAGATGGAGCTAGGTCTTGGTCACCGTGGTAAAAGCCGTCCAAGCACCCTCTTGGCAGTGTGATTGGAGACTTTTACCGTGGTCTGAGATCAGTCATACCCGGCGAACTGCGTAGCACGCACCACGTGATCATCAAAAGATTCCAAGAAAGATAAGTTTG	0	3	2	1	1	2	21	9	1	12	21	24	89	66	275	142	188	119
miR-2037	ATGGAATCGGTTCTTATGGCGCCCGTGGTAAATGATTCATGAGATGGAGCTAGGTCTTGGTCACCGTGGTAAAAGCCGTCCAAGCACCCTCTTGGCAGTGTGATTGGAGACTTTTACCGTGGTCTGAGATCAGTCATACCCGGCGAACTGCGTAGCACGCACCACGTGATCATCAAAAGATTCCAAGAAAGATAAGTTTGA	0	3	2	1	1	2	21	9	1	12	21	24	89	66	275	142	188	119
miR-9417	AAAATTCCTCATTCATTCTCTAACACCACTTCCCTGCTCTTATCTAAGCTTTAACATGGCTCCCAAAATGAGAAGCAGTAATGTTCTGTGTTATATTGAGAGTGCGGGACTCTCTGAGGATCTCAGCGAGTTTGAGAGTGAGAACGTATCGGCAGGGTCTCGCTTGGCCACCAAGAATGAAATGCTCAAGACTATCACTCA	5	7	7	9	44	82	177	97	22	73	42	59	374	355	42	51	52	40
miR-9417	AGCTTTAACATGGCTCCCAAAATGAGAAGCAGTAATGTTCTGTGTTATATTGAGAGTGCGGGACTCTCTGAGGATCTCAGCGAGTTTGAGAGTGAGAACGTATCGGCAGGGTCTCGCTTGGCCACCAAGAATGAAATGCTCAAGACTATCACTCATTATTCTTACACATGCACTGAGAAAAGAGGTGGTATAAAAAGGAGG	6	7	8	9	44	82	175	97	22	72	42	59	374	355	40	51	51	40
miR-9417	ATTCTCTAACACCACTTCCCTGCTCTTATCTAAGCTTTAACATGGCTCCCAAAATGAGAAGCAGTAATGTTCTGTGTTATATTGAGAGTGCGGGACTCTCTGAGGATCTCAGCGAGTTTGAGAGTGAGAACGTATCGGCAGGGTCTCGCTTGGCCACCAAGAATGAAATGCTCAAGACTATCACTCATTATTCTTACACAT	5	7	7	9	44	82	177	97	22	73	42	59	374	355	41	51	52	40
miR-9417	CTCTTATCTAAGCTTTAACATGGCTCCCAAAATGAGAAGCAGTAATGTTCTGTGTTATATTGAGAGTGCGGGACTCTCTGAGGATCTCAGCGAGTTTGAGAGTGAGAACGTATCGGCAGGGTCTCGCTTGGCCACCAAGAATGAAATGCTCAAGACTATCACTCATTATTCTTACACATGCACTGAGAAAAGAGGTGGTAT	6	7	8	9	44	82	177	97	22	73	42	59	374	355	41	52	52	40
miR-9417	CTGCTCTTATCTAAGCTTTAACATGGCTCCCAAAATGAGAAGCAGTAATGTTCTGTGTTATATTGAGAGTGCGGGACTCTCTGAGGATCTCAGCGAGTTTGAGAGTGAGAACGTATCGGCAGGGTCTCGCTTGGCCACCAAGAATGAAATGCTCAAGACTATCACTCATTATTCTTACACATGCACTGAGAAAAGAGGTGG	6	7	8	9	44	82	177	97	22	73	42	59	374	355	41	51	52	40
miR-9417	CTTATCTAAGCTTTAACATGGCTCCCAAAATGAGAAGCAGTAATGTTCTGTGTTATATTGAGAGTGCGGGACTCTCTGAGGATCTCAGCGAGTTTGAGAGTGAGAACGTATCGGCAGGGTCTCGCTTGGCCACCAAGAATGAAATGCTCAAGACTATCACTCATTATTCTTACACATGCACTGAGAAAAGAGGTGGTATAA	6	7	8	9	44	82	177	97	22	73	42	59	374	355	41	52	52	40
miR-9417	GAAAATTCCTCATTCATTCTCTAACACCACTTCCCTGCTCTTATCTAAGCTTTAACATGGCTCCCAAAATGAGAAGCAGTAATGTTCTGTGTTATATTGAGAGTGCGGGACTCTCTGAGGATCTCAGCGAGTTTGAGAGTGAGAACGTATCGGCAGGGTCTCGCTTGGCCACCAAGAATGAAATGCTCAAGACTATCACTC	5	7	7	9	44	82	177	97	22	73	42	59	374	355	42	51	52	40
miR-9417	GTTGAAAATTCCTCATTCATTCTCTAACACCACTTCCCTGCTCTTATCTAAGCTTTAACATGGCTCCCAAAATGAGAAGCAGTAATGTTCTGTGTTATATTGAGAGTGCGGGACTCTCTGAGGATCTCAGCGAGTTTGAGAGTGAGAACGTATCGGCAGGGTCTCGCTTGGCCACCAAGAATGAAATGCTCAAGACTATCA	5	7	7	9	44	82	177	97	22	73	42	59	374	355	42	51	52	40
miR-9417	TAAGCTTTAACATGGCTCCCAAAATGAGAAGCAGTAATGTTCTGTGTTATATTGAGAGTGCGGGACTCTCTGAGGATCTCAGCGAGTTTGAGAGTGAGAACGTATCGGCAGGGTCTCGCTTGGCCACCAAGAATGAAATGCTCAAGACTATCACTCATTATTCTTACACATGCACTGAGAAAAGAGGTGGTATAAAAAGGA	6	7	8	9	44	82	175	97	22	73	42	59	374	355	40	51	51	40
miR-9417	TACATCACGCCGTTGAAAATTCCTCATTCATTCTCTAACACCACTTCCCTGCTCTTATCTAAGCTTTAACATGGCTCCCAAAATGAGAAGCAGTAATGTTCTGTGTTATATTGAGAGTGCGGGACTCTCTGAGGATCTCAGCGAGTTTGAGAGTGAGAACGTATCGGCAGGGTCTCGCTTGGCCACCAAGAATGAAATGCT	5	7	7	9	44	82	177	97	22	73	42	59	374	355	43	51	52	40
miR-9417	TATCTAAGCTTTAACATGGCTCCCAAAATGAGAAGCAGTAATGTTCTGTGTTATATTGAGAGTGCGGGACTCTCTGAGGATCTCAGCGAGTTTGAGAGTGAGAACGTATCGGCAGGGTCTCGCTTGGCCACCAAGAATGAAATGCTCAAGACTATCACTCATTATTCTTACACATGCACTGAGAAAAGAGGTGGTATAAAA	6	7	8	9	44	82	177	97	22	73	42	59	374	355	41	51	52	40
miR-9417	TCACGCCGTTGAAAATTCCTCATTCATTCTCTAACACCACTTCCCTGCTCTTATCTAAGCTTTAACATGGCTCCCAAAATGAGAAGCAGTAATGTTCTGTGTTATATTGAGAGTGCGGGACTCTCTGAGGATCTCAGCGAGTTTGAGAGTGAGAACGTATCGGCAGGGTCTCGCTTGGCCACCAAGAATGAAATGCTCAAG	5	7	7	9	44	82	177	97	22	73	42	59	374	355	43	51	52	40
miR-9417	TGAAAATTCCTCATTCATTCTCTAACACCACTTCCCTGCTCTTATCTAAGCTTTAACATGGCTCCCAAAATGAGAAGCAGTAATGTTCTGTGTTATATTGAGAGTGCGGGACTCTCTGAGGATCTCAGCGAGTTTGAGAGTGAGAACGTATCGGCAGGGTCTCGCTTGGCCACCAAGAATGAAATGCTCAAGACTATCACT	5	7	7	9	44	82	177	97	22	73	42	59	374	355	42	51	52	40
miR-9417	TTATCTAAGCTTTAACATGGCTCCCAAAATGAGAAGCAGTAATGTTCTGTGTTATATTGAGAGTGCGGGACTCTCTGAGGATCTCAGCGAGTTTGAGAGTGAGAACGTATCGGCAGGGTCTCGCTTGGCCACCAAGAATGAAATGCTCAAGACTATCACTCATTATTCTTACACATGCACTGAGAAAAGAGGTGGTATAAA	6	7	8	9	44	82	177	97	22	73	42	59	374	355	41	52	52	40
miR-9418	AATCTGTGATATGTCTGAGACTGAACTAAAGGCCGAGTTTAGGTTCCGTCGTGGCGAAATTGACCTGCTTGTCGAAGCCCTTTCAAATCCCGGAGTCATACAAGTGCATCAATGGAACTGTTTCTTCTGGTTTGGAAGGAATATTGATGTTTTTTAGGAGGTTTGCATACCCTTGATGACTCGGTGATATGATCCCACGGT	84	82	71	76	221	188	307	203	118	196	145	217	257	284	81	71	117	173
miR-9418	AGACTGAACTAAAGGCCGAGTTTAGGTTCCGTCGTGGCGAAATTGACCTGCTTGTCGAAGCCCTTTCAAATCCCGGAGTCATACAAGTGCATCAATGGAACTGTTTCTTCTGGTTTGGAAGGAATATTGATGTTTTTTAGGAGGTTTGCATACCCTTGATGACTCGGTGATATGATCCCACGGTTTGGTCGCTCTATTCCT	105	95	85	86	272	232	406	276	138	256	163	250	306	314	97	79	128	190
miR-9418	ATCTGTGATATGTCTGAGACTGAACTAAAGGCCGAGTTTAGGTTCCGTCGTGGCGAAATTGACCTGCTTGTCGAAGCCCTTTCAAATCCCGGAGTCATACAAGTGCATCAATGGAACTGTTTCTTCTGGTTTGGAAGGAATATTGATGTTTTTTAGGAGGTTTGCATACCCTTGATGACTCGGTGATATGATCCCACGGTT	84	82	72	76	223	189	307	204	118	197	145	217	262	285	83	71	118	173
miR-9418	CCCGGAGTCATACAAGTGCATCAATGGAACTGTTTCTTCTGGTTTGGAAGGAATATTGATGTTTTTTAGGAGGTTTGCATACCCTTGATGACTCGGTGATATGATCCCACGGTTTGGTCGCTCTATTCCTGAGATTGGCCTCATTTTATCAGAGGTCACCTATTTTCTTGTGAATACACATGGTCATCTGCTACTTGACTT	109	105	93	94	287	251	442	297	152	288	174	264	325	340	118	92	141	205
miR-9418	CCCGGAGTCATACAAGTGCATCAATGGAACTGTTTCTTCTGGTTTGGAAGGAATATTGATGTTTTTTAGTAGGTTTGCATACCCTTGATGACTCGGTGATATGATCCCACGGTTTGGTCGCTCTATTCCTGAGATTGGCCTCATTTTATCAGAGGTCACCTATTTTCTTGTGAATACACATGGTCATCTGCTACTTGACTT	109	105	93	94	287	251	442	297	152	288	174	264	325	340	119	92	141	205
miR-9418	CTGTGATATGTCTGAGACTGAACTAAAGGCCGAGTTTAGGTTCCGTCGTGGCGAAATTGACCTGCTTGTCGAAGCCCTTTCAAATCCCGGAGTCATACAAGTGCATCAATGGAACTGTTTCTTCTGGTTTGGAAGGAATATTGATGTTTTTTAGGAGGTTTGCATACCCTTGATGACTCGGTGATATGATCCCACGGTTTG	84	82	73	76	223	189	307	205	118	197	145	217	262	285	83	71	118	173
miR-9418	CTTTCAAATCCCGGAGTCATACAAGTGCATCAATGGAACTGTTTCTTCTGGTTTGGAAGGAATATTGATGTTTTTTAGGAGGTTTGCATACCCTTGATGACTCGGTGATATGATCCCACGGTTTGGTCGCTCTATTCCTGAGATTGGCCTCATTTTATCAGAGGTCACCTATTTTCTTGTGAATACACATGGTCATCTGCT	106	100	89	91	279	243	419	284	144	268	166	254	314	330	103	83	134	195
miR-9418	CTTTCAAATCCCGGAGTCATACAAGTGCATCAATGGAACTGTTTCTTCTGGTTTGGAAGGAATATTGATGTTTTTTAGTAGGTTTGCATACCCTTGATGACTCGGTGATATGATCCCACGGTTTGGTCGCTCTATTCCTGAGATTGGCCTCATTTTATCAGAGGTCACCTATTTTCTTGTGAATACACATGGTCATCTGCT	106	100	89	91	279	243	419	284	144	268	166	254	314	330	104	83	134	195
miR-9418	GACTGAACTAAAGGCCGAGTTTAGGTTCCGTCGTGGCGAAATTGACCTGCTTGTCGAAGCCCTTTCAAATCCCGGAGTCATACAAGTGCATCAATGGAACTGTTTCTTCTGGTTTGGAAGGAATATTGATGTTTTTTAGGAGGTTTGCATACCCTTGATGACTCGGTGATATGATCCCACGGTTTGGTCGCTCTATTCCTG	105	95	85	86	272	232	406	276	138	256	163	250	306	314	97	79	128	190
miR-9418	GAGACTGAACTAAAGGCCGAGTTTAGGTTCCGTCGTGGCGAAATTGACCTGCTTGTCGAAGCCCTTTCAAATCCCGGAGTCATACAAGTGCATCAATGGAACTGTTTCTTCTGGTTTGGAAGGAATATTGATGTTTTTTAGGAGGTTTGCATACCCTTGATGACTCGGTGATATGATCCCACGGTTTGGTCGCTCTATTCC	105	95	85	86	272	232	406	276	138	256	163	250	306	314	97	79	128	190
miR-9418	GATATGTCTGAGACTGAACTAAAGGCCGAGTTTAGGTTCCGTCGTGGCGAAATTGACCTGCTTGTCGAAGCCCTTTCAAATCCCGGAGTCATACAAGTGCATCAATGGAACTGTTTCTTCTGGTTTGGAAGGAATATTGATGTTTTTTAGGAGGTTTGCATACCCTTGATGACTCGGTGATATGATCCCACGGTTTGGTCG	84	82	74	76	226	189	307	205	119	197	146	217	262	285	83	72	118	175
miR-9418	GTCATTCAAGTGCATCAATGGAACTGTTTCTTCTGGTTTAGAAGGACTATTGACTATTGATGTTTTTGAGGAGGTTTGCATACCCTTGCAGACTCGGTGATATGATCCCACGGTTTGGTCGCTCTATTCCTGAGCTTAGCCTCATTTTATCAGAGGTCACCGATTTTATTGTGAATACACATGGTCATCTGCTACTTGACT	124	123	120	108	302	263	477	318	167	298	188	273	353	359	134	103	166	225
miR-9418	GTCTGAGACTGAACTAAAGGCCGAGTTTAGGTTCCGTCGTGGCGAAATTGACCTGCTTGTCGAAGCCCTTTCAAATCCCGGAGTCATACAAGTGCATCAATGGAACTGTTTCTTCTGGTTTGGAAGGAATATTGATGTTTTTTAGGAGGTTTGCATACCCTTGATGACTCGGTGATATGATCCCACGGTTTGGTCGCTCTA	103	90	82	83	260	224	377	254	131	241	160	243	293	303	90	74	123	183
miR-9418	GTGATATGTCTGAGACTGAACTAAAGGCCGAGTTTAGGTTCCGTCGTGGCGAAATTGACCTGCTTGTCGAAGCCCTTTCAAATCCCGGAGTCATACAAGTGCATCAATGGAACTGTTTCTTCTGGTTTGGAAGGAATATTGATGTTTTTTAGGAGGTTTGCATACCCTTGATGACTCGGTGATATGATCCCACGGTTTGGT	84	82	73	76	226	189	307	205	118	197	146	217	262	285	83	71	118	173
miR-9418	TCATTCAAGTGCATCAATGGAACTGTTTCTTCTGGTTTAGAAGGACTATTGACTATTGATGTTTTTGAGGAGGTTTGCATACCCTTGCAGACTCGGTGATATGATCCCACGGTTTGGTCGCTCTATTCCTGAGCTTAGCCTCATTTTATCAGAGGTCACCGATTTTATTGTGAATACACATGGTCATCTGCTACTTGACTT	124	123	120	108	302	263	477	318	167	298	188	273	353	360	134	103	166	225
miR-9418	TCCCGGAGTCATACAAGTGCATCAATGGAACTGTTTCTTCTGGTTTGGAAGGAATATTGATGTTTTTTAGGAGGTTTGCATACCCTTGATGACTCGGTGATATGATCCCACGGTTTGGTCGCTCTATTCCTGAGATTGGCCTCATTTTATCAGAGGTCACCTATTTTCTTGTGAATACACATGGTCATCTGCTACTTGACT	109	105	93	94	287	251	442	297	152	288	174	264	325	339	118	92	141	205
miR-9418	TCCCGGAGTCATACAAGTGCATCAATGGAACTGTTTCTTCTGGTTTGGAAGGAATATTGATGTTTTTTAGTAGGTTTGCATACCCTTGATGACTCGGTGATATGATCCCACGGTTTGGTCGCTCTATTCCTGAGATTGGCCTCATTTTATCAGAGGTCACCTATTTTCTTGTGAATACACATGGTCATCTGCTACTTGACT	109	105	93	94	287	251	442	297	152	288	174	264	325	339	119	92	141	205
miR-9418	TCTGTGATATGTCTGAGACTGAACTAAAGGCCGAGTTTAGGTTCCGTCGTGGCGAAATTGACCTGCTTGTCGAAGCCCTTTCAAATCCCGGAGTCATACAAGTGCATCAATGGAACTGTTTCTTCTGGTTTGGAAGGAATATTGATGTTTTTTAGGAGGTTTGCATACCCTTGATGACTCGGTGATATGATCCCACGGTTT	84	82	73	76	223	189	307	205	118	197	145	217	262	285	83	71	118	173
miR-9418	TGATATGTCTGAGACTGAACTAAAGGCCGAGTTTAGGTTCCGTCGTGGCGAAATTGACCTGCTTGTCGAAGCCCTTTCAAATCCCGGAGTCATACAAGTGCATCAATGGAACTGTTTCTTCTGGTTTGGAAGGAATATTGATGTTTTTTAGGAGGTTTGCATACCCTTGATGACTCGGTGATATGATCCCACGGTTTGGTC	84	82	73	76	226	189	307	205	118	197	146	217	262	285	83	72	118	175
miR-9418	TGGAGTCATTTGCTCGGGCGATCCCCGAAGCCCTTTCAAATCCCGGAGTCATACAAGTGCATCAATGGAACTGTTTCTTCTGGTTTGGAAGGAATATTGATGTTTTTTAGTAGGTTTGCATACCCTTGATGACTCGGTGATATGATCCCACGGTTTGGTCGCTCTATTCCTGAGATTGGCCTCATTTTATCAGAGGTCACC	105	95	84	86	272	232	406	276	138	256	163	250	306	314	98	79	128	190
miR-9418	TGTGATATGTCTGAGACTGAACTAAAGGCCGAGTTTAGGTTCCGTCGTGGCGAAATTGACCTGCTTGTCGAAGCCCTTTCAAATCCCGGAGTCATACAAGTGCATCAATGGAACTGTTTCTTCTGGTTTGGAAGGAATATTGATGTTTTTTAGGAGGTTTGCATACCCTTGATGACTCGGTGATATGATCCCACGGTTTGG	84	82	73	76	223	189	307	205	118	197	145	217	262	285	83	71	118	173
miR-9419	CCTTCAAGACAATGGCGTAGGCGAAGAGACAATATGTCATTTGAAAGAAATAAAGTGAGACCGAACTTGACATTCAAGCAACCTCGAAATCATGAAATGTTCTTGAAGATGCTTGAATTTTAAGTTTTGTCGCTTCTTGAAGAAAAAGAGCTACCTTACAAAAGAAACAAAAACACATTAAAAGATGACTGCTGTCAGAAA	0	0	4	1	0	0	0	0	0	0	0	1	0	0	199	79	1	0
miR-9419	GAAGCATTGACCGCCTTTGGGCAAAAGGACTCCTTCAAGACAATGGCGTAGGCGAAGAGACAATATGTCATTTGAAAGAAATAAAGTGAGACCGAACTTGACATTCAAGCAACCTCGAAATCATGAAATGTTCTTGAAGATGCTTGAATTTTAAGTTTTGTCGCTTCTTGAAGAAAAAGAGCTACCTTACAAAAGAAACAA	0	0	4	1	0	0	0	0	0	0	0	1	0	0	199	79	1	0
miR-9419	TCCTTCAAGACAATGGCGTAGGCGAAGAGACAATATGTCATTTGAAAGAAATAAAGTGAGACCGAACTTGACATTCAAGCAACCTCGAAATCATGAAATGTTCTTGAAGATGCTTGAATTTTAAGTTTTGTCGCTTCTTGAAGAAAAAGAGCTACCTTACAAAAGAAACAAAAACACATTAAAAGATGACTGCTGTCAGAA	0	0	4	1	0	0	0	0	0	0	0	1	0	0	199	79	1	0
miR-9420	AAATCAGCCTCCTGGGGAACCTGTGGTAAAATCGCATCCACCATATAATACTCGCGCATGCGCTAAAAAGACCGCTGATCAGCATCAAATAAAAATACAAATCAGCCGACTGGGAAGCCTGTGGTGTGGACACGGAAAATCAGCTTTTCGCGTATGCGATACCAAGATTAGACTCCTATAATAAACTCCTATAGGTTTTAT	12	13	22	9	42	51	122	65	49	76	70	80	282	242	40	57	21	20
miR-9420	AATACAAATCAGCCTCCTGGGGAACCTGTGGTAAAATCGCATCCACCATATAATACTCGCGCATGCGCTAAAAAGACCGCTGATCAGCATCAAATAAAAATACAAATCAGCCGACTGGGAAGCCTGTGGTGTGGACACGGAAAATCAGCTTTTCGCGTATGCGATACCAAGATTAGACTCCTATAATAAACTCCTATAGGT	12	13	22	9	42	51	122	65	49	76	70	80	282	242	40	57	21	20
miR-9420	AGCCGACTGGGAAGCCTGTGGTGTGGACACGAAAAATTGCATCCACTATATGAAACTCGCGCTTGGGCTAAAACACCGCTGATTGATATGAAATCAATATACAAATCAGCCGACTGGGAAGCCTGTGTGGACACGAAAAATGTACTATATGAAACTCGCGCATGCGCTAAAAAAACACAGATCAGCATAAAATAAAATACA	12	13	19	9	41	48	123	65	48	76	69	84	284	240	33	58	20	19
miR-9420	AGCCTCCTGGGGAACCTGTGGTAAAATCGCATCCACCATATAATACTCGCGCATGCGCTAAAAAGACCGCTGATCAGCATCAAATAAAAATACAAATCAGCCGACTGGGAAGCCTGTGGTGTGGACACGGAAAATCAGCTTTTCGCGTATGCGATACCAAGATTAGACTCCTATAATAAACTCCTATAGGTTTTATACACT	12	13	22	9	42	51	122	65	49	76	70	80	282	242	40	57	21	20
miR-9420	ATACAAATCAGCCTCCTGGGGAACCTGTGGTAAAATCGCATCCACCATATAATACTCGCGCATGCGCTAAAAAGACCGCTGATCAGCATCAAATAAAAATACAAATCAGCCGACTGGGAAGCCTGTGGTGTGGACACGGAAAATCAGCTTTTCGCGTATGCGATACCAAGATTAGACTCCTATAATAAACTCCTATAGGTT	12	13	22	9	42	51	122	65	49	76	70	80	282	242	40	57	21	20
miR-9420	ATATGAAACTCGCGCTTGGGCTAAAACACCGCTGATTGATATGAAATCAATATACAAATCAGCCGACTGGGAAGCCTGTGTGGACACGAAAAATGTACTATATGAAACTCGCGCATGCGCTAAAAAAACACAGATCAGCATAAAATAAAATACAAATCAGCCGACTGGGAAACCTGTGGTGCGTGTGGACACGAAAAATCG	13	13	21	11	45	53	139	76	56	88	81	92	330	282	44	62	24	26
miR-9420	CAAATCAGCCTCCTGGGGAACCTGTGGTAAAATCGCATCCACCATATAATACTCGCGCATGCGCTAAAAAGACCGCTGATCAGCATCAAATAAAAATACAAATCAGCCGACTGGGAAGCCTGTGGTGTGGACACGGAAAATCAGCTTTTCGCGTATGCGATACCAAGATTAGACTCCTATAATAAACTCCTATAGGTTTTA	12	13	22	9	42	51	122	65	49	76	70	80	282	242	40	57	21	20
miR-9420	CACTATATGAAACTCGCGCTTGGGCTAAAACACCGCTGATTGATATGAAATCAATATACAAATCAGCCGACTGGGAAGCCTGTGTGGACACGAAAAATGTACTATATGAAACTCGCGCATGCGCTAAAAAAACACAGATCAGCATAAAATAAAATACAAATCAGCCGACTGGGAAACCTGTGGTGCGTGTGGACACGAAAA	13	13	21	11	45	53	139	76	56	88	81	92	330	282	44	62	24	26
miR-9420	CAGCCGACTGGGAAGCCTGTGGTGTGGACACGAAAAATTGCATCCACTATATGAAACTCGCGCTTGGGCTAAAACACCGCTGATTGATATGAAATCAATATACAAATCAGCCGACTGGGAAGCCTGTGTGGACACGAAAAATGTACTATATGAAACTCGCGCATGCGCTAAAAAAACACAGATCAGCATAAAATAAAATAC	12	13	19	9	41	48	123	65	48	76	69	84	284	240	33	58	20	19
miR-9420	CGACTGGGAAGCCTGTGGTGTGGACACGAAAAATTGCATCCACTATATGAAACTCGCGCTTGGGCTAAAACACCGCTGATTGATATGAAATCAATATACAAATCAGCCGACTGGGAAGCCTGTGTGGACACGAAAAATGTACTATATGAAACTCGCGCATGCGCTAAAAAAACACAGATCAGCATAAAATAAAATACAAAT	12	13	18	9	41	48	121	62	48	74	69	83	284	239	33	55	20	18
miR-9420	GACTGGGAAGCCTGTGGTGTGGACACGAAAAATTGCATCCACTATATGAAACTCGCGCTTGGGCTAAAACACCGCTGATTGATATGAAATCAATATACAAATCAGCCGACTGGGAAGCCTGTGTGGACACGAAAAATGTACTATATGAAACTCGCGCATGCGCTAAAAAAACACAGATCAGCATAAAATAAAATACAAATC	12	13	18	9	41	48	121	62	48	74	69	83	284	239	33	55	20	18
miR-9420	TAATACAAATCAGCCTCCTGGGGAACCTGTGGTAAAATCGCATCCACCATATAATACTCGCGCATGCGCTAAAAAGACCGCTGATCAGCATCAAATAAAAATACAAATCAGCCGACTGGGAAGCCTGTGGTGTGGACACGGAAAATCAGCTTTTCGCGTATGCGATACCAAGATTAGACTCCTATAATAAACTCCTATAGG	12	13	22	9	42	51	122	65	49	76	70	80	282	242	40	57	21	20
miR-9420	TCAGCCTCCTGGGGAACCTGTGGTAAAATCGCATCCACCATATAATACTCGCGCATGCGCTAAAAAGACCGCTGATCAGCATCAAATAAAAATACAAATCAGCCGACTGGGAAGCCTGTGGTGTGGACACGGAAAATCAGCTTTTCGCGTATGCGATACCAAGATTAGACTCCTATAATAAACTCCTATAGGTTTTATACA	12	13	22	9	42	51	122	65	49	76	70	80	282	242	40	57	21	20
miR-9420	TCAGCCGACTGGGAAGCCTGTGGTGTGGACACGAAAAATTGCATCCACTATATGAAACTCGCGCTTGGGCTAAAACACCGCTGATTGATATGAAATCAATATACAAATCAGCCGACTGGGAAGCCTGTGTGGACACGAAAAATGTACTATATGAAACTCGCGCATGCGCTAAAAAAACACAGATCAGCATAAAATAAAATA	12	13	19	9	41	48	123	65	48	76	69	84	284	240	33	58	20	19
miR-9420	TCATAATACAAATCAGCCTCCTGGGGAACCTGTGGTAAAATCGCATCCACCATATAATACTCGCGCATGCGCTAAAAAGACCGCTGATCAGCATCAAATAAAAATACAAATCAGCCGACTGGGAAGCCTGTGGTGTGGACACGGAAAATCAGCTTTTCGCGTATGCGATACCAAGATTAGACTCCTATAATAAACTCCTAT	12	13	22	9	42	51	122	65	49	76	70	80	282	242	40	57	21	20
miR-9421	CCCCTCAGCTTAGTGCTTGGGCAAATGGAACCTTTGTCGTCGTCAGTTAAACGACTTGTATTGGTTACCATAAATGGTAGATACGAAATTCGTTAAATGATTGCGTATCTGCCATTAATGCTAACCAACACAGGTTCCAACAAATGGTAACCGTCCAGGTTCATCTGATGGATGACAGCGCACCAGAACCAGACCACATGT	0	0	4	3	0	0	0	0	0	0	1	1	0	0	192	103	1	0
miR-9421	CCCTCAGCTTAGTGCTTGGGCAAATGGAACCTTTGTCGTCGTCAGTTAAACGACTTGTATTGGTTACCATAAATGGTAGATACGAAATTCGTTAAATGATTGCGTATCTGCCATTAATGCTAACCAACACAGGTTCCAACAAATGGTAACCGTCCAGGTTCATCTGATGGATGACAGCGCACCAGAACCAGACCACATGTC	0	0	4	3	0	0	0	0	0	0	1	1	0	0	192	103	1	0
miR-9421	TACTTGCCGAGTAATTGACTACGCTGATGAGACCCCTCAGCTTAGTGCTTGGGCAAATGGAACCTTTGTCGTCGTCAGTTAAACGACTTGTATTGGTTACCATAAATGGTAGATACGAAATTCGTTAAATGATTGCGTATCTGCCATTAATGCTAACCAACACAGGTTCCAACAAATGGTAACCGTCCAGGTTCATCTGAT	0	0	4	3	0	0	0	0	0	0	1	1	0	0	192	103	1	0
miR-9421	TTACTTGCCGAGTAATTGACTACGCTGATGAGACCCCTCAGCTTAGTGCTTGGGCAAATGGAACCTTTGTCGTCGTCAGTTAAACGACTTGTATTGGTTACCATAAATGGTAGATACGAAATTCGTTAAATGATTGCGTATCTGCCATTAATGCTAACCAACACAGGTTCCAACAAATGGTAACCGTCCAGGTTCATCTGA	0	0	4	3	0	0	0	0	0	0	1	1	0	0	192	103	1	0
miR-9422	AACCTGTGTTGGTTACCATAAAGGGTAGACACGCAACCATTCGACGTCACGTCAAGGCTCATCTGATGGATTACTGCGTAATAGAACCAGACCGCATGTCAGCGTTTCAAGTTTCCGTCAGTCATGGCTGACAGAAGATAGAAGCGCTGACATGTGGTCTGATGTCACATGATGAGCATGAGTGGATGGTGGCAGAGATAT	0	0	3	2	4	1	2	1	2	1	3	2	0	1	183	126	1	2
miR-9422	ACACGCAACCATTCGACGTCACGTCAAGGCTCATCTGATGGATTACTGCGTAATAGAACCAGACCGCATGTCAGCGTTTCAAGTTTCCGTCAGTCATGGCTGACAGAAGATAGAAGCGCTGACATGTGGTCTGATGTCACATGATGAGCATGAGTGGATGGTGGCAGAGATATCTGAGCACCTTACAGCTAACAAACTGGA	0	0	3	2	4	1	2	1	2	1	3	2	0	1	183	126	1	2
miR-9422	ACGCAACCATTCGACGTCACGTCAAGGCTCATCTGATGGATTACTGCGTAATAGAACCAGACCGCATGTCAGCGTTTCAAGTTTCCGTCAGTCATGGCTGACAGAAGATAGAAGCGCTGACATGTGGTCTGATGTCACATGATGAGCATGAGTGGATGGTGGCAGAGATATCTGAGCACCTTACAGCTAACAAACTGGAGT	0	0	3	2	4	1	2	1	2	1	3	2	0	1	183	126	1	2
miR-9422	ATGGATTACTGCGTAATAGAACCAGACCGCATGTCAGCGTTTCAAGTTTCCGTCAGTCATGGCTGACAGAAGATAGAAGCGCTGACATGTGGTCTGATGTCACATGATGAGCATGAGTGGATGGTGGCAGAGATATCTGAGCACCTTACAGCTAACAAACTGGAGTGTTTCCACTCTAACTAGACCTTGAGGGGTTTGGCA	0	0	3	2	4	1	2	1	2	1	3	2	0	1	183	126	1	2
miR-9422	CACGCAACCATTCGACGTCACGTCAAGGCTCATCTGATGGATTACTGCGTAATAGAACCAGACCGCATGTCAGCGTTTCAAGTTTCCGTCAGTCATGGCTGACAGAAGATAGAAGCGCTGACATGTGGTCTGATGTCACATGATGAGCATGAGTGGATGGTGGCAGAGATATCTGAGCACCTTACAGCTAACAAACTGGAG	0	0	3	2	4	1	2	1	2	1	3	2	0	1	183	126	1	2
miR-9422	GACACGCAACCATTCGACGTCACGTCAAGGCTCATCTGATGGATTACTGCGTAATAGAACCAGACCGCATGTCAGCGTTTCAAGTTTCCGTCAGTCATGGCTGACAGAAGATAGAAGCGCTGACATGTGGTCTGATGTCACATGATGAGCATGAGTGGATGGTGGCAGAGATATCTGAGCACCTTACAGCTAACAAACTGG	0	0	3	2	4	1	2	1	2	1	3	2	0	1	183	126	1	2
miR-9422	GATTACTGCGTAATAGAACCAGACCGCATGTCAGCGTTTCAAGTTTCCGTCAGTCATGGCTGACAGAAGATAGAAGCGCTGACATGTGGTCTGATGTCACATGATGAGCATGAGTGGATGGTGGCAGAGATATCTGAGCACCTTACAGCTAACAAACTGGAGTGTTTCCACTCTAACTAGACCTTGAGGGGTTTGGCATGG	0	0	3	2	4	1	2	1	2	1	3	2	0	1	183	126	1	2
miR-2032b	ACCATGGAGTACCTCGTGCCCGACAACGATGCAGCAATGGGAGTCCATGCGCCCGATAACCAGGCTGATATGGAAACCACAACACCCGAAGAGGATCGCGAGCTCACCGTTGCTGTCGCTGCAACAGTTAGCTAGCATTTATTGCGAGGTAACTGTTGCAGCATCCATGACTGTGAGGTCAGTATTTCAGCATCTAAAGAT	0	0	2	8	0	0	28	0	6	2	16	2	40	12	548	228	30	8
miR-2032b	CATGCGCCCGATAACCAGGCTGATATGGAAACCACAACACCCGATGAGGATCGCGAGCTCACCGTTGCTGTCGCTGCAACAGTTAGCTAGCATTTATTGCGAGGTAACTGTTGCAGCATCCATGACTGTGAGGTCAGTATTTCAGCATCTAAAGATAAATGCAAGCTCACTGTTACAGCATCCGAGCCGTCCTCGAGAAAG	0	0	2	8	0	0	28	0	6	2	16	2	40	12	548	228	30	8
miR-2032b	CATGCGCCCGATAACCAGGCTGATATGGAAACCACAACACCCGAAGAGGATCGCGAGCTCACCGTTGCTGTCGCTGCAACAGTTAGCTAGCATTTATTGCGAGGTAACTGTTGCAGCATCCATGACTGTGAGGTCAGTATTTCAGCATCTAAAGATAAATGCAAGCTCACTGTTACAGCATCCGAGCCGTCCTCGAGAAAG	0	0	2	8	0	0	28	0	6	2	16	2	40	12	548	228	30	8
miR-2032b	CCATGCGCCCGATAACCAGGCTGATATGGAAACCACAACACCCGATGAGGATCGCGAGCTCACCGTTGCTGTCGCTGCAACAGTTAGCTAGCATTTATTGCGAGGTAACTGTTGCAGCATCCATGACTGTGAGGTCAGTATTTCAGCATCTAAAGATAAATGCAAGCTCACTGTTACAGCATCCGAGCCGTCCTCGAGAAA	0	0	2	8	0	0	28	0	6	2	16	2	40	12	548	228	30	8
miR-2032b	CCATGCGCCCGATAACCAGGCTGATATGGAAACCACAACACCCGAAGAGGATCGCGAGCTCACCGTTGCTGTCGCTGCAACAGTTAGCTAGCATTTATTGCGAGGTAACTGTTGCAGCATCCATGACTGTGAGGTCAGTATTTCAGCATCTAAAGATAAATGCAAGCTCACTGTTACAGCATCCGAGCCGTCCTCGAGAAA	0	0	2	8	0	0	28	0	6	2	16	2	40	12	548	228	30	8
miR-2032b	GCCCGACAACGATGCAGCAATGGGAGTCCATGCGCCCGATAACCAGGCTGATATGGAAACCACAACACCCGAAGAGGATCGCGAGCTCACCGTTGCTGTCGCTGCAACAGTTAGCTAGCATTTATTGCGAGGTAACTGTTGCAGCATCCATGACTGTGAGGTCAGTATTTCAGCATCTAAAGATAAATGCAAGCTCACTGT	0	0	2	8	0	0	28	0	6	2	16	2	40	12	548	228	30	8
miR-2032b	GCCTGACAACGATGCAGCAATGGGAGTCCATGCGCCCGATAACCAGGCTGATATGGAAACCACAACACCCGATGAGGATCGCGAGCTCACCGTTGCTGTCGCTGCAACAGTTAGCTAGCATTTATTGCGAGGTAACTGTTGCAGCATCCATGACTGTGAGGTCAGTATTTCAGCATCTAAAGATAAATGCAAGCTCACTGT	0	0	2	8	0	0	28	0	6	2	16	2	40	12	548	228	30	8
miR-2032b	GGCCTGACAACGATGCAGCAATGGGAGTCCATGCGCCCGATAACCAGGCTGATATGGAAACCACAACACCCGATGAGGATCGCGAGCTCACCGTTGCTGTCGCTGCAACAGTTAGCTAGCATTTATTGCGAGGTAACTGTTGCAGCATCCATGACTGTGAGGTCAGTATTTCAGCATCTAAAGATAAATGCAAGCTCACTG	0	0	2	8	0	0	28	0	6	2	16	2	40	12	548	228	30	8
miR-2032b	GTGCCCGACAACGATGCAGCAATGGGAGTCCATGCGCCCGATAACCAGGCTGATATGGAAACCACAACACCCGAAGAGGATCGCGAGCTCACCGTTGCTGTCGCTGCAACAGTTAGCTAGCATTTATTGCGAGGTAACTGTTGCAGCATCCATGACTGTGAGGTCAGTATTTCAGCATCTAAAGATAAATGCAAGCTCACT	0	0	2	8	0	0	28	0	6	2	16	2	40	12	548	228	30	8
miR-2032b	TAACCAGGCTGATATGGAAACCACAACACCCGATGAGGATCGCGAGCTCACCGTTGCTGTCGCTGCAACAGTTAGCTAGCATTTATTGCGAGGTAACTGTTGCAGCATCCATGACTGTGAGGTCAGTATTTCAGCATCTAAAGATAAATGCAAGCTCACTGTTACAGCATCCGAGCCGTCCTCGAGAAAGAGGATACAAAG	0	0	2	8	0	0	28	0	6	2	16	2	40	12	548	228	30	8
miR-2032b	TAACCAGGCTGATATGGAAACCACAACACCCGAAGAGGATCGCGAGCTCACCGTTGCTGTCGCTGCAACAGTTAGCTAGCATTTATTGCGAGGTAACTGTTGCAGCATCCATGACTGTGAGGTCAGTATTTCAGCATCTAAAGATAAATGCAAGCTCACTGTTACAGCATCCGAGCCGTCCTCGAGAAAGAGGATACAAAG	0	0	2	8	0	0	28	0	6	2	16	2	40	12	548	228	30	8
miR-2032b	TCTGCCGTGCTCCCTTGGCCTGACAACGATGCAGCAATGGGAGTCCATGCGCCCGATAACCAGGCTGATATGGAAACCACAACACCCGATGAGGATCGCGAGCTCACCGTTGCTGTCGCTGCAACAGTTAGCTAGCATTTATTGCGAGGTAACTGTTGCAGCATCCATGACTGTGAGGTCAGTATTTCAGCATCTAAAGAT	0	0	2	8	0	0	28	0	6	2	16	2	40	12	548	228	30	8
miR-2032b	TGCCCGACAACGATGCAGCAATGGGAGTCCATGCGCCCGATAACCAGGCTGATATGGAAACCACAACACCCGAAGAGGATCGCGAGCTCACCGTTGCTGTCGCTGCAACAGTTAGCTAGCATTTATTGCGAGGTAACTGTTGCAGCATCCATGACTGTGAGGTCAGTATTTCAGCATCTAAAGATAAATGCAAGCTCACTG	0	0	2	8	0	0	28	0	6	2	16	2	40	12	548	228	30	8
miR-2032b	TGGCCTGACAACGATGCAGCAATGGGAGTCCATGCGCCCGATAACCAGGCTGATATGGAAACCACAACACCCGATGAGGATCGCGAGCTCACCGTTGCTGTCGCTGCAACAGTTAGCTAGCATTTATTGCGAGGTAACTGTTGCAGCATCCATGACTGTGAGGTCAGTATTTCAGCATCTAAAGATAAATGCAAGCTCACT	0	0	2	8	0	0	28	0	6	2	16	2	40	12	548	228	30	8
miR-9423	AAAAGAGCTAAGAGGCCCACAGCTGGAGATGTTGTTCGTGGTATGAAACCATACGAACCCAAAAAGGCGCCACCATTTTCCATTTTGGATATGGTCCGTATGAAGAACTACTGCTTCAAAACAATTGAGGTAAGTGGTTGCCATAAATATGATGGTCTGGTTGCAAAAAATACTTACCGTACTAATCATTGCTGCTCATTT	113	135	132	161	246	253	216	276	149	136	96	117	152	171	114	119	57	66
miR-9423	AGCTCTCTAAAAGAGCTAAGAGGCCCACAGCTGGAGATGTTGTTCGTGGTATGAAACCATACGAACCCAAAAAGGCGCCACCATTTTCCATTTTGGATATGGTCCGTATGAAGAACTACTGCTTCAAAACAATTGAGGTAAGTGGTTGCCATAAATATGATGGTCTGGTTGCAAAAAATACTTACCGTACTAATCATTGCT	113	135	132	161	247	253	216	276	149	136	96	117	152	171	114	119	57	66
miR-9423	ATTATTGTCATTTGTTGTAGTTGTCAAGCAGACAATCCGTCAGCTCTCTAAAAGAGCTAAGAGGCCCACAGCTGGAGATGTTGTTCGTGGTATGAAACCATACGAACCCAAAAAGGCGCCACCATTTTCCATTTTGGATATGGTCCGTATGAAGAACTACTGCTTCAAAACAATTGAGGTAAGTGGTTGCCATAAATATGA	115	136	133	162	249	254	219	278	149	138	97	117	152	171	114	119	57	66
miR-9423	ATTGTCATTTGTTGTAGTTGTCAAGCAGACAATCCGTCAGCTCTCTAAAAGAGCTAAGAGGCCCACAGCTGGAGATGTTGTTCGTGGTATGAAACCATACGAACCCAAAAAGGCGCCACCATTTTCCATTTTGGATATGGTCCGTATGAAGAACTACTGCTTCAAAACAATTGAGGTAAGTGGTTGCCATAAATATGATGG	115	136	133	162	249	254	219	278	149	138	97	117	152	171	114	119	57	66
miR-9423	CAGCTCTCTAAAAGAGCTAAGAGGCCCACAGCTGGAGATGTTGTTCGTGGTATGAAACCATACGAACCCAAAAAGGCGCCACCATTTTCCATTTTGGATATGGTCCGTATGAAGAACTACTGCTTCAAAACAATTGAGGTAAGTGGTTGCCATAAATATGATGGTCTGGTTGCAAAAAATACTTACCGTACTAATCATTGC	114	135	133	162	249	254	217	277	149	138	96	117	152	171	114	119	57	66
miR-9423	CTCTCTAAAAGAGCTAAGAGGCCCACAGCTGGAGATGTTGTTCGTGGTATGAAACCATACGAACCCAAAAAGGCGCCACCATTTTCCATTTTGGATATGGTCCGTATGAAGAACTACTGCTTCAAAACAATTGAGGTAAGTGGTTGCCATAAATATGATGGTCTGGTTGCAAAAAATACTTACCGTACTAATCATTGCTGC	113	135	132	161	247	253	216	276	149	136	96	117	152	171	114	119	57	66
miR-9423	GACAATCCGTCAGCTCTCTAAAAGAGCTAAGAGGCCCACAGCTGGAGATGTTGTTCGTGGTATGAAACCATACGAACCCAAAAAGGCGCCACCATTTTCCATTTTGGATATGGTCCGTATGAAGAACTACTGCTTCAAAACAATTGAGGTAAGTGGTTGCCATAAATATGATGGTCTGGTTGCAAAAAATACTTACCGTAC	115	136	133	162	249	254	219	278	149	138	97	117	152	171	114	119	57	66
miR-9423	GCTCTCTAAAAGAGCTAAGAGGCCCACAGCTGGAGATGTTGTTCGTGGTATGAAACCATACGAACCCAAAAAGGCGCCACCATTTTCCATTTTGGATATGGTCCGTATGAAGAACTACTGCTTCAAAACAATTGAGGTAAGTGGTTGCCATAAATATGATGGTCTGGTTGCAAAAAATACTTACCGTACTAATCATTGCTG	113	135	132	161	247	253	216	276	149	136	96	117	152	171	114	119	57	66
miR-9423	GTCAGCTCTCTAAAAGAGCTAAGAGGCCCACAGCTGGAGATGTTGTTCGTGGTATGAAACCATACGAACCCAAAAAGGCGCCACCATTTTCCATTTTGGATATGGTCCGTATGAAGAACTACTGCTTCAAAACAATTGAGGTAAGTGGTTGCCATAAATATGATGGTCTGGTTGCAAAAAATACTTACCGTACTAATCATT	114	135	133	162	249	254	218	278	149	138	96	117	152	171	114	119	57	66
miR-9423	GTTGTCAAGCAGACAATCCGTCAGCTCTCTAAAAGAGCTAAGAGGCCCACAGCTGGAGATGTTGTTCGTGGTATGAAACCATACGAACCCAAAAAGGCGCCACCATTTTCCATTTTGGATATGGTCCGTATGAAGAACTACTGCTTCAAAACAATTGAGGTAAGTGGTTGCCATAAATATGATGGTCTGGTTGCAAAAAAT	115	136	133	162	249	254	219	278	149	138	97	117	152	171	114	119	57	66
miR-9423	TCAGCTCTCTAAAAGAGCTAAGAGGCCCACAGCTGGAGATGTTGTTCGTGGTATGAAACCATACGAACCCAAAAAGGCGCCACCATTTTCCATTTTGGATATGGTCCGTATGAAGAACTACTGCTTCAAAACAATTGAGGTAAGTGGTTGCCATAAATATGATGGTCTGGTTGCAAAAAATACTTACCGTACTAATCATTG	114	135	133	162	249	254	218	278	149	138	96	117	152	171	114	119	57	66
miR-9423	TCTCTAAAAGAGCTAAGAGGCCCACAGCTGGAGATGTTGTTCGTGGTATGAAACCATACGAACCCAAAAAGGCGCCACCATTTTCCATTTTGGATATGGTCCGTATGAAGAACTACTGCTTCAAAACAATTGAGGTAAGTGGTTGCCATAAATATGATGGTCTGGTTGCAAAAAATACTTACCGTACTAATCATTGCTGCT	113	135	132	161	246	253	216	276	149	136	96	117	152	171	114	119	57	66
miR-2041b	AAAAATATTTTGTTTTTACTTCTAAAGAGCAAACCAGCTAAGACTAGTTAAGTGCATCCTCGGAAACCCAGGGGTATTTTTCTCTAACGTTTCACACGTTAGAGGAAAATACCCCTGGGTTTCCGAGGATGAGTTAAGTGTAATGTCCTTCACAAATTAATGTGAAGTAATGAAACCACTGGATGATTTCTGACAATATAT	0	0	3	1	257	27	179	57	134	49	62	36	94	48	44	28	17	2
miR-2041b	ATATCTGACTCCGGAGTGGGAGTGTGTCAATTCTCAAGGGGAAAAATATTTTGTTTTTACTTCTAAAGAGCAAACCAGCTAAGACTAGTTAAGTGCATCCTCGGAAACCCAGGGGTATTTTTCTCTAACGTTTCACACGTTAGAGGAAAATACCCCTGGGTTTCCGAGGATGAGTTAAGTGTAATGTCCTTCACAAATTAA	0	0	3	1	257	27	179	57	134	49	62	36	94	48	44	28	17	2
miR-2041b	CCGGAGTGGGAGTGTGTCAATTCTCAAGGGGAAAAATATTTTGTTTTTACTTCTAAAGAGCAAACCAGCTAAGACTAGTTAAGTGCATCCTCGGAAACCCAGGGGTATTTTTCTCTAACGTTTCACACGTTAGAGGAAAATACCCCTGGGTTTCCGAGGATGAGTTAAGTGTAATGTCCTTCACAAATTAATGTGAAGTAA	0	0	3	1	257	27	179	57	134	49	62	36	94	48	44	28	17	2
miR-2041b	GAAAAATATTTTGTTTTTACTTCTAAAGAGCAAACCAGCTAAGACTAGTTAAGTGCATCCTCGGAAACCCAGGGGTATTTTTCTCTAACGTTTCACACGTTAGAGGAAAATACCCCTGGGTTTCCGAGGATGAGTTAAGTGTAATGTCCTTCACAAATTAATGTGAAGTAATGAAACCACTGGATGATTTCTGACAATATA	0	0	3	1	257	27	179	57	134	49	62	36	94	48	44	28	17	2
miR-2041b	GGAAAAATATTTTGTTTTTACTTCTAAAGAGCAAACCAGCTAAGACTAGTTAAGTGCATCCTCGGAAACCCAGGGGTATTTTTCTCTAACGTTTCACACGTTAGAGGAAAATACCCCTGGGTTTCCGAGGATGAGTTAAGTGTAATGTCCTTCACAAATTAATGTGAAGTAATGAAACCACTGGATGATTTCTGACAATAT	0	0	3	1	257	27	179	57	134	49	62	36	94	48	44	28	17	2
miR-2041b	GGAGTGGGAGTGTGTCAATTCTCAAGGGGAAAAATATTTTGTTTTTACTTCTAAAGAGCAAACCAGCTAAGACTAGTTAAGTGCATCCTCGGAAACCCAGGGGTATTTTTCTCTAACGTTTCACACGTTAGAGGAAAATACCCCTGGGTTTCCGAGGATGAGTTAAGTGTAATGTCCTTCACAAATTAATGTGAAGTAATG	0	0	3	1	257	27	179	57	134	49	62	36	94	48	44	28	17	2
miR-2041b	GGGAAAAATATTTTGTTTTTACTTCTAAAGAGCAAACCAGCTAAGACTAGTTAAGTGCATCCTCGGAAACCCAGGGGTATTTTTCTCTAACGTTTCACACGTTAGAGGAAAATACCCCTGGGTTTCCGAGGATGAGTTAAGTGTAATGTCCTTCACAAATTAATGTGAAGTAATGAAACCACTGGATGATTTCTGACAATA	0	0	3	1	257	27	179	57	134	49	62	36	94	48	44	28	17	2
miR-2041b	GTGGGAGTGTGTCAATTCTCAAGGGGAAAAATATTTTGTTTTTACTTCTAAAGAGCAAACCAGCTAAGACTAGTTAAGTGCATCCTCGGAAACCCAGGGGTATTTTTCTCTAACGTTTCACACGTTAGAGGAAAATACCCCTGGGTTTCCGAGGATGAGTTAAGTGTAATGTCCTTCACAAATTAATGTGAAGTAATGAAA	0	0	3	1	257	27	179	57	134	49	62	36	94	48	44	28	17	2
miR-2041b	TCCGGAGTGGGAGTGTGTCAATTCTCAAGGGGAAAAATATTTTGTTTTTACTTCTAAAGAGCAAACCAGCTAAGACTAGTTAAGTGCATCCTCGGAAACCCAGGGGTATTTTTCTCTAACGTTTCACACGTTAGAGGAAAATACCCCTGGGTTTCCGAGGATGAGTTAAGTGTAATGTCCTTCACAAATTAATGTGAAGTA	0	0	3	1	257	27	179	57	134	49	62	36	94	48	44	28	17	2
miR-2041b	AACAACGTTATACATCTTGTACATCTTAGACCTCTCTGCCGCATTTGATACAGTAGATCAAATCCTCGGAAACCCAGGGTTATTTTGCTCTAACGTTTCACTCGCGAGTGAAACGTTAGAGGAAAATACCCCTGGGTTTCCGAGGATGGGTAGATCATGAAATCCTCCTCAAACGACTGGAACACCGATATGGTATAACAA	0	0	2	0	220	26	168	55	118	46	60	34	90	46	42	25	12	2
miR-2041b	ATTCGAGCCTTGACCACACCACTCAGGCCGCACGCGCTAACAAACTCATCCTCGGAAACCCAGGGGTATTTTCCTCTAGCGTTTCGATCGGGAGTAACACGTTAGAGGAAAATACCCCTGGGTTTCCGAGGATGTAACAAACTCTCTCAAACCGGACAAGGGCTTACCTAAGCTGCAAGGGACGGTAAGAAGAAAGCTGTC	0	0	2	0	220	26	168	55	118	46	59	34	88	45	41	25	12	2
miR-2041b	CGAGCCTTGACCACACCACTCAGGCCGCACGCGCTAACAAACTCATCCTCGGAAACCCAGGGGTATTTTCCTCTAGCGTTTCGATCGGGAGTAACACGTTAGAGGAAAATACCCCTGGGTTTCCGAGGATGTAACAAACTCTCTCAAACCGGACAAGGGCTTACCTAAGCTGCAAGGGACGGTAAGAAGAAAGCTGTCGAT	0	0	2	0	220	26	168	55	118	46	59	34	88	45	41	25	12	2
miR-2041b	CTTGTACATCTTAGACCTCTCTGCCGCATTTGATACAGTAGATCAAATCCTCGGAAACCCAGGGTTATTTTGCTCTAACGTTTCACTCGCGAGTGAAACGTTAGAGGAAAATACCCCTGGGTTTCCGAGGATGGGTAGATCATGAAATCCTCCTCAAACGACTGGAACACCGATATGGTATAACAAGTAAAGCTCTGGCAT	0	0	2	0	220	26	168	55	118	46	60	34	90	46	42	25	12	2
miR-2041b	CTTTTTGATTCTACCACAGGGAGTCGATGCATCAGAGTCTTTTCATCCTCGGAGACCCAGGGGTATTTTGCTCTAACGTTTCACTCGCGATTGAAATGTTAGAGGAAAATACCCCTGGGTTTCCGAGGATGGAGTCTTTTGTGAGCAAGTTTGTATTATATATCTTTTCGGGATGAATAACGATAATGATGAGAGTAACTA	0	0	2	0	220	26	168	55	118	46	59	34	88	45	40	25	12	2
miR-2041b	GCTTTTTGATTCTACCACAGGGAGTCGATGCATCAGAGTCTTTTCATCCTCGGAGACCCAGGGGTATTTTGCTCTAACGTTTCACTCGCGATTGAAATGTTAGAGGAAAATACCCCTGGGTTTCCGAGGATGGAGTCTTTTGTGAGCAAGTTTGTATTATATATCTTTTCGGGATGAATAACGATAATGATGAGAGTAACT	0	0	2	0	220	26	168	55	118	46	59	34	88	45	40	25	12	2
miR-2041b	GGCTTTTTGATTCTACCACAGGGAGTCGATGCATCAGAGTCTTTTCATCCTCGGAGACCCAGGGGTATTTTGCTCTAACGTTTCACTCGCGATTGAAATGTTAGAGGAAAATACCCCTGGGTTTCCGAGGATGGAGTCTTTTGTGAGCAAGTTTGTATTATATATCTTTTCGGGATGAATAACGATAATGATGAGAGTAAC	0	0	2	0	220	26	168	55	118	46	59	34	88	45	40	25	12	2
miR-2041b	GGGCTTTTTGATTCTACCACAGGGAGTCGATGCATCAGAGTCTTTTCATCCTCGGAGACCCAGGGGTATTTTGCTCTAACGTTTCACTCGCGATTGAAATGTTAGAGGAAAATACCCCTGGGTTTCCGAGGATGGAGTCTTTTGTGAGCAAGTTTGTATTATATATCTTTTCGGGATGAATAACGATAATGATGAGAGTAA	0	0	2	0	220	26	168	55	118	46	59	34	88	45	40	25	12	2
miR-2041b	TCGAGCCTTGACCACACCACTCAGGCCGCACGCGCTAACAAACTCATCCTCGGAAACCCAGGGGTATTTTCCTCTAGCGTTTCGATCGGGAGTAACACGTTAGAGGAAAATACCCCTGGGTTTCCGAGGATGTAACAAACTCTCTCAAACCGGACAAGGGCTTACCTAAGCTGCAAGGGACGGTAAGAAGAAAGCTGTCGA	0	0	2	0	220	26	168	55	118	46	59	34	88	45	41	25	12	2
miR-2041b	TCTTGTACATCTTAGACCTCTCTGCCGCATTTGATACAGTAGATCAAATCCTCGGAAACCCAGGGTTATTTTGCTCTAACGTTTCACTCGCGAGTGAAACGTTAGAGGAAAATACCCCTGGGTTTCCGAGGATGGGTAGATCATGAAATCCTCCTCAAACGACTGGAACACCGATATGGTATAACAAGTAAAGCTCTGGCA	0	0	2	0	220	26	168	55	118	46	60	34	90	46	42	25	12	2
miR-2041b	TGTACATCTTAGACCTCTCTGCCGCATTTGATACAGTAGATCAAATCCTCGGAAACCCAGGGTTATTTTGCTCTAACGTTTCACTCGCGAGTGAAACGTTAGAGGAAAATACCCCTGGGTTTCCGAGGATGGGTAGATCATGAAATCCTCCTCAAACGACTGGAACACCGATATGGTATAACAAGTAAAGCTCTGGCATGG	0	0	2	1	220	26	172	55	118	46	62	34	90	46	42	25	12	2
miR-2041b	TTATACAACGTTAACAACGTTATACATCTTGTACATCTTAGACCTCTCTGCCGCATTTGATACAGTAGATCAAATCCTCGGAAACCCAGGGTTATTTTGCTCTAACGTTTCACTCGCGAGTGAAACGTTAGAGGAAAATACCCCTGGGTTTCCGAGGATGGGTAGATCATGAAATCCTCCTCAAACGACTGGAACACCGAT	0	0	2	0	220	26	168	55	118	46	60	34	90	46	42	25	12	2
miR-2041b	TTCCTGATTGGCTATTCGTGCGCGCGTGATTGACATGTCGGATCTATGAATTCGAGCCTTGACCACACCACTCAGGCCGCACGCGCTAACAAACTCATCCTCGGAAACCCAGGGGTATTTTCCTCTAGCGTTTCGATCGGGAGTAACACGTTAGAGGAAAATACCCCTGGGTTTCCGAGGATGTAACAAACTCTCTCAAAC	0	0	2	0	221	26	168	55	118	46	59	34	88	46	41	26	12	2
miR-2041b	TTCGAGCCTTGACCACACCACTCAGGCCGCACGCGCTAACAAACTCATCCTCGGAAACCCAGGGGTATTTTCCTCTAGCGTTTCGATCGGGAGTAACACGTTAGAGGAAAATACCCCTGGGTTTCCGAGGATGTAACAAACTCTCTCAAACCGGACAAGGGCTTACCTAAGCTGCAAGGGACGGTAAGAAGAAAGCTGTCG	0	0	2	0	220	26	168	55	118	46	59	34	88	45	41	25	12	2
miR-2041b	TTGTACATCTTAGACCTCTCTGCCGCATTTGATACAGTAGATCAAATCCTCGGAAACCCAGGGTTATTTTGCTCTAACGTTTCACTCGCGAGTGAAACGTTAGAGGAAAATACCCCTGGGTTTCCGAGGATGGGTAGATCATGAAATCCTCCTCAAACGACTGGAACACCGATATGGTATAACAAGTAAAGCTCTGGCATG	0	0	2	1	220	26	171	55	118	46	62	34	90	46	42	25	12	2
miR-9424a	AATATCAGAGGAAAAGACCACAATGAGATGCGAGGCGCTGCAAGCTCATCAGACACCGTCCTTAAAGACTGCCTCGATAAACCAGCTTTACAGATATCTGTATAGTTGGCTCATCGAGGCAGTCTTAAATGACGGTATGTCCAAGACTGTTTCAATTACAGCCTCGACAGCACACGTGAACACCTCAACACCCCTGGGACC	0	0	3	2	0	0	0	0	0	0	5	3	1	0	135	113	0	0
miR-9424a	ATATCAGAGGAAAAGACCACAATGAGATGCGAGGCGCTGCAAGCTCATCAGACACCGTCCTTAAAGACTGCCTCGATAAACCAGCTTTACAGATATCTGTATAGTTGGCTCATCGAGGCAGTCTTAAATGACGGTATGTCCAAGACTGTTTCAATTACAGCCTCGACAGCACACGTGAACACCTCAACACCCCTGGGACCT	0	0	3	2	0	0	0	0	0	0	5	3	1	0	135	113	0	0
miR-2042	AACTAACGTGTTTTGATTTAGTTTGCAGCCGTTCTTTTGCAAGCGGAGAGGTATTTACAATGACGACACACCCTTATAAATCATCCTTGCACTACTTATGTCGTACATTGATGATTTATGAAGGTGTGTTGCTGACTCTGCTAAAACGACAACAAACAACTCGCACGGGACCGCCTATGAAAATAAAAAAAAACATCCAGC	0	1	4	3	0	0	10	2	1	4	6	7	15	15	206	107	69	13
miR-2042	ACTAACGTGTTTTGATTTAGTTTGCAGCCGTTCTTTTGCAAGCGGAGAGGTATTTACAATGACGACACACCCTTATAAATCATCCTTGCACTACTTATGTCGTACATTGATGATTTATGAAGGTGTGTTGCTGACTCTGCTAAAACGACAACAAACAACTCGCACGGGACCGCCTATGAAAATAAAAAAAAACATCCAGCT	0	1	4	3	0	0	10	2	1	4	6	7	15	15	206	107	69	13
miR-2042	CTAACGTGTTTTGATTTAGTTTGCAGCCGTTCTTTTGCAAGCGGAGAGGTATTTACAATGACGACACACCCTTATAAATCATCCTTGCACTACTTATGTCGTACATTGATGATTTATGAAGGTGTGTTGCTGACTCTGCTAAAACGACAACAAACAACTCGCACGGGACCGCCTATGAAAATAAAAAAAAACATCCAGCTT	0	1	4	3	0	0	10	2	1	4	6	7	15	15	206	107	69	13
miR-2042	CTCAATTTTGTTTGAATGTCTTTCAAAACTAACGTGTTTTGATTTAGTTTGCAGCCGTTCTTTTGCAAGCGGAGAGGTATTTACAATGACGACACACCCTTATAAATCATCCTTGCACTACTTATGTCGTACATTGATGATTTATGAAGGTGTGTTGCTGACTCTGCTAAAACGACAACAAACAACTCGCACGGGACCGCC	0	1	4	3	0	0	10	2	1	4	6	7	15	15	206	107	69	13
miR-2042	TCTCAATTTTGTTTGAATGTCTTTCAAAACTAACGTGTTTTGATTTAGTTTGCAGCCGTTCTTTTGCAAGCGGAGAGGTATTTACAATGACGACACACCCTTATAAATCATCCTTGCACTACTTATGTCGTACATTGATGATTTATGAAGGTGTGTTGCTGACTCTGCTAAAACGACAACAAACAACTCGCACGGGACCGC	0	1	4	3	0	0	10	2	1	4	6	7	15	15	206	107	69	13
miR-9425	TTAGGCAACGGCTTAATCTAGTTTTGTTATTATTGGTCAGGCATTGAATGGTCAAATGTTGGAATGGAATGAAATAAGTAAATGGCGAGTCACATGGAGAAGAACACCCAAAATAGCTGAACATCGCATTCAGTTTACTTGAGTGTTCTCCTCTGGGGCTTTGCATGGACATTTACATGGTGACTACGCATGCGCATGCTC	0	1	1	1	0	0	14	3	4	7	26	20	72	81	106	81	72	74
miR-9425	TTTAGGCAACGGCTTAATCTAGTTTTGTTATTATTGGTCAGGCATTGAATGGTCAAATGTTGGAATGGAATGAAATAAGTAAATGGCGAGTCACATGGAGAAGAACACCCAAAATAGCTGAACATCGCATTCAGTTTACTTGAGTGTTCTCCTCTGGGGCTTTGCATGGACATTTACATGGTGACTACGCATGCGCATGCT	0	1	1	1	0	0	14	3	4	7	26	20	72	81	106	81	72	74
miR-2038	CCCTGATGAGTGTAGTGTCACCCTGATGAGCGACAGTGTCAACCTGATGACCTTAGTGTCACCCTGATGACCTTAATGTCACCATGATGACCTTAGTGTCACCCTGATGACCTTAGTGTCATCCTGATGAGCGATGGTGTCACCCTGATGAGCTTAGTGTCACCCTGATGAGTGTAGTGTCACCCTGATGAGCGACAGTGT	0	1	2	2	0	0	11	2	2	2	3	3	13	6	91	34	98	45
miR-2038	CCTGATGAGCGACAGTGTCAACCTGATGAGCCTTAGTGTCACCCTGATGACCTTAGTGTCACCCTGATGACCTTAATGTCACCATGATGACCTTAGTGTCACCCTGATGACCTTAGTGTCATCCTGATGAGCGATAGTGTCACCCTGATGAGCTTAGTGTCACCCTGATGAGTGTAGTGTCACCCTGATGAGCGATAGTGT	0	1	2	2	0	0	11	2	2	2	3	3	13	6	91	34	98	45
miR-2038	CGATAGTGTCACCCTGATGAGCTTAGTGTCACCCTGATGAGTGTAGTGTCACCCTGATGAGCGACAGTGTCAACCTGATGACCTTAGTGTCACCCTGATGACCTTAATGTCACCATGATGACCTTAGTGTCACCCTGATGACCTTAGTGTCATCCTGATGAGCGATGGTGTCACCCTGATGAGCTTAGTGTCACCCTGATG	0	1	2	2	0	0	11	2	2	2	3	3	13	6	91	34	98	45
miR-2038	CTGATGAGCGACAGTGTCACCCTGATGAGCTTAGTGTCACCCTGATGAGTGTAGTGTCACCCTGATGAGCGACAGTGTCAACCTGATGAGCCTTAGTGTCACCCTGATGACCTTAGTGTCACCCTGATGACCTTAATGTCACCATGATGACCTTAGTGTCACCCTGATGACCTTAGTGTCATCCTGATGAGCGATAGTGTC	0	1	2	2	0	0	11	2	2	2	3	3	13	6	91	34	98	45
miR-2038	CTTAGTGTCACCCTGATGAGTGTAGTGTCACCCTGATGAGCGACAGTGTCAACCTGATGAGCCTTAGTGTCACCCTGATGACCTTAGTGTCACCCTGATGACCTTAATGTCACCATGATGACCTTAGTGTCACCCTGATGACCTTAGTGTCATCCTGATGAGCGATAGTGTCACCCTGATGAGCTTAGTGTCACCCTGATG	0	1	2	2	0	0	11	2	2	2	3	3	13	6	91	34	98	45
miR-2038	GATAGTGTCACCCTGATGAGCTTAGTGTCACCCTGATGAGTGTAGTGTCACCCTGATGAGCGACAGTGTCAACCTGATGACCTTAGTGTCACCCTGATGACCTTAATGTCACCATGATGACCTTAGTGTCACCCTGATGACCTTAGTGTCATCCTGATGAGCGATGGTGTCACCCTGATGAGCTTAGTGTCACCCTGATGA	0	1	2	2	0	0	11	2	2	2	3	3	13	6	91	34	98	45
miR-2038	TTAGTGTCACCCTGATGAGTGTAGTGTCACCCTGATGAGCGACAGTGTCAACCTGATGAGCCTTAGTGTCACCCTGATGACCTTAGTGTCACCCTGATGACCTTAATGTCACCATGATGACCTTAGTGTCACCCTGATGACCTTAGTGTCATCCTGATGAGCGATAGTGTCACCCTGATGAGCTTAGTGTCACCCTGATGA	0	1	2	2	0	0	11	2	2	2	3	3	13	6	91	34	98	45
miR-9426	AGAGTCTGATGATGAAGAGTTTGAGGGCTTTGAAAGCCATGGAATTGGCTGTTAAAGCTCGGATAGCTCTTCCGAAGACAAAGGCCACCAGAGCGGAGACATAGAAGACAAGATTTGGCCAAGAAATTATTCACCGATCTCTATTCCTGACCTCGCTCCTAGATGCGACCCAAAAAAAACCTGTAGACTTGTCCCCCCATC	1	1	0	0	122	114	128	90	57	99	93	77	55	76	2	5	4	4
miR-9426	GAGTCTGATGATGAAGAGTTTGAGGGCTTTGAAAGCCATGGAATTGGCTGTTAAAGCTCGGATAGCTCTTCCGAAGACAAAGGCCACCAGAGCGGAGACATAGAAGACAAGATTTGGCCAAGAAATTATTCACCGATCTCTATTCCTGACCTCGCTCCTAGATGCGACCCAAAAAAAACCTGTAGACTTGTCCCCCCATCT	1	1	0	0	122	114	128	90	57	99	93	77	55	76	2	5	4	4
miR-9426	GGAGAGTCTGATGATGAAGAGTTTGAGGGCTTTGAAAGCCATGGAATTGGCTGTTAAAGCTCGGATAGCTCTTCCGAAGACAAAGGCCACCAGAGCGGAGACATAGAAGACAAGATTTGGCCAAGAAATTATTCACCGATCTCTATTCCTGACCTCGCTCCTAGATGCGACCCAAAAAAAACCTGTAGACTTGTCCCCCCA	1	1	0	0	122	114	128	90	57	99	93	77	55	77	2	6	4	4
miR-9426	GTCTGATGATGAAGAGTTTGAGGGCTTTGAAAGCCATGGAATTGGCTGTTAAAGCTCGGATAGCTCTTCCGAAGACAAAGGCCACCAGAGCGGAGACATAGAAGACAAGATTTGGCCAAGAAATTATTCACCGATCTCTATTCCTGACCTCGCTCCTAGATGCGACCCAAAAAAAACCTGTAGACTTGTCCCCCCATCTTT	1	1	0	0	122	112	127	90	57	98	93	77	55	75	2	5	4	4
miR-9426	TCGGAGAGTCTGATGATGAAGAGTTTGAGGGCTTTGAAAGCCATGGAATTGGCTGTTAAAGCTCGGATAGCTCTTCCGAAGACAAAGGCCACCAGAGCGGAGACATAGAAGACAAGATTTGGCCAAGAAATTATTCACCGATCTCTATTCCTGACCTCGCTCCTAGATGCGACCCAAAAAAAACCTGTAGACTTGTCCCCC	1	1	0	0	122	114	128	90	57	99	92	77	55	77	2	6	4	4
miR-9426	TCTTCGGAGAGTCTGATGATGAAGAGTTTGAGGGCTTTGAAAGCCATGGAATTGGCTGTTAAAGCTCGGATAGCTCTTCCGAAGACAAAGGCCACCAGAGCGGAGACATAGAAGACAAGATTTGGCCAAGAAATTATTCACCGATCTCTATTCCTGACCTCGCTCCTAGATGCGACCCAAAAAAAACCTGTAGACTTGTCC	1	1	0	0	122	114	128	90	58	99	92	77	55	77	2	6	4	4
miR-9426	TTCGGAGAGTCTGATGATGAAGAGTTTGAGGGCTTTGAAAGCCATGGAATTGGCTGTTAAAGCTCGGATAGCTCTTCCGAAGACAAAGGCCACCAGAGCGGAGACATAGAAGACAAGATTTGGCCAAGAAATTATTCACCGATCTCTATTCCTGACCTCGCTCCTAGATGCGACCCAAAAAAAACCTGTAGACTTGTCCCC	1	1	0	0	122	114	128	90	57	99	92	77	55	77	2	6	4	4
miR-9427	ACAAACTAAATGAATGTATGGAGAAAAGAATGTTGATTAGAAACGCTAATGATTGCTGCCAGCATACACCGCAACCTCACTTCCCTCCTCTGTCAGGAAGAGACCAGTGAGATTGAAGTGAATGCTGTGTATGTGATTGAGCGATGGAGGGAAGTCTTAGTAAGAAAATGCGATTGAGCGATGGAGAAAAGTAAGAAGAAG	0	0	1	0	0	0	4	1	0	0	0	1	1	4	63	87	5	3
miR-9427	TAACAAACTAAATGAATGTATGGAGAAAAGAATGTTGATTAGAAACGCTAATGATTGCTGCCAGCATACACCGCAACCTCACTTCCCTCCTCTGTCAGGAAGAGACCAGTGAGATTGAAGTGAATGCTGTGTATGTGATTGAGCGATGGAGGGAAGTCTTAGTAAGAAAATGCGATTGAGCGATGGAGAAAAGTAAGAAGA	0	0	1	0	0	0	4	1	0	0	0	1	1	4	63	87	5	3
miR-2047	AAAGTGCAGGGGAAGCGGAGCTATGGTATGGATATTGATGTGGTTGTATGGGCGGTTGGTTGCGTTTTGAAAATCCGGGAGTAAATTCGTAACTGCTCAATTCGCCGAGCAGATGTCGGAGAGTTCAACTGTCCGACATCTGCTCGGCGAATTTAAGCAGTTATTTTGACCAAGAAAATGCACTATGTATGGTGGAACAAA	0	0	1	0	16	3	12	2	9	5	9	2	6	2	90	17	2	0
miR-2047	AAAGTGCAGGGGAAGCGGAGCTATGGTATGGATATTGATGTGGTTATATTGGCGGTTGGTTGCGTTTTGAAAATCCGGGAGTAAATTCGTAACTGCTCAATTCGCCGAGCAGATGTCGGAGAGTTCAACTGTCAGACATCTGCTCGGCGAATTGAGCAGTTATTTTGACCAAGAAAATGCACTATGTATGGTGGAACAAAC	0	0	1	0	20	3	15	2	8	5	10	2	7	4	88	17	2	0
miR-2047	AAGTGCAGGGGAAGCGGAGCTATGGTATGGATATTGATGTGGTTATATTGGCGGTTGGTTGCGTTTTGAAAATCCGGGAGTAAATTCGTAACTGCTCAATTCGCCGAGCAGATGTCGGAGAGTTCAACTGTCAGACATCTGCTCGGCGAATTGAGCAGTTATTTTGACCAAGAAAATGCACTATGTATGGTGGAACAAACG	0	0	1	0	20	3	15	2	8	5	10	2	7	4	88	17	2	0
miR-2047	AAGTGCAGGGGAAGCGGAGCTATGGTATGGATATTGATGTGGTTGTATGGGCGGTTGGTTGCGTTTTGAAAATCCGGGAGTAAATTCGTAACTGCTCAATTCGCCGAGCAGATGTCGGAGAGTTCAACTGTCCGACATCTGCTCGGCGAATTTAAGCAGTTATTTTGACCAAGAAAATGCACTATGTATGGTGGAACAAAC	0	0	1	0	16	3	12	2	9	5	9	2	6	2	90	17	2	0
miR-2047	ATATTGATGTGGTTATATTGGCGGTTGGTTGCGTTTTGAAAATCCGGGAGTAAATTCGTAACTGCTCAATTCGCCGAGCAGATGTCGGAGAGTTCAACTGTCAGACATCTGCTCGGCGAATTGAGCAGTTATTTTGACCAAGAAAATGCACTATGTATGGTGGAACAAACGTGGGAAAGGGATAGCTGTGGACGAGATAAA	0	0	1	0	20	3	15	2	8	5	10	2	7	4	88	17	2	0
miR-2047	ATATTGATGTGGTTGTATGGGCGGTTGGTTGCGTTTTGAAAATCCGGGAGTAAATTCGTAACTGCTCAATTCGCCGAGCAGATGTCGGAGAGTTCAACTGTCCGACATCTGCTCGGCGAATTTAAGCAGTTATTTTGACCAAGAAAATGCACTATGTATGGTGGAACAAACGTGGGAAAGAGATAGCTGTGGACGAGATAA	0	0	1	0	16	3	12	2	9	5	9	2	6	2	90	17	2	0
miR-2047	GATATTGATGTGGTTGTATGGGCGGTTGGTTGCGTTTTGAAAATCCGGGAGTAAATTCGTAACTGCTCAATTCGCCGAGCAGATGTCGGAGAGTTCAACTGTCCGACATCTGCTCGGCGAATTTAAGCAGTTATTTTGACCAAGAAAATGCACTATGTATGGTGGAACAAACGTGGGAAAGAGATAGCTGTGGACGAGATA	0	0	1	0	16	3	12	2	9	5	9	2	6	2	90	17	2	0
miR-9428	AGAAAAAGCATATAGTAAAGATTTACTGTATTGTTAATAGATCTCTGCTGGAGTATGCTGCCTCTGGCTGGGCCTCCAGGAGCACCTTAGTAGAAATGAAAGCCTGTTATTGTGCTGTCTCTGATACAGTACCGCTCACGAACATAGGGACACTGTTCGGGAATTTCGCGAACATATGTCCACATGTTCGAGAGCTGTACT	0	2	7	0	19	5	85	16	23	26	50	22	152	67	159	101	122	21
miR-9428	AGATCTCTGCTGGAGTATGCTGCCTCTGGCTGGGCCTCCAGGAGCACCTTAGTAGAAATGAAAGCCTGTTATTGTGCTGTCTCTGATACAGTACCGCTCACGAACATAGGGACACTGTTCGGGAATTTCGCGAACATATGTCCACATGTTCGAGAGCTGTACTGTAGTTGAACCAATCAAGTCCATTATACCTATTGGAAC	0	2	7	0	19	5	85	16	23	26	50	22	152	67	158	101	121	21
miR-9428	ATAGATCTCTGCTGGAGTATGCTGCCTCTGGCTGGGCCTCCAGGAGCACCTTAGTAGAAATGAAAGCCTGTTATTGTGCTGTCTCTGATACAGTACCGCTCACGAACATAGGGACACTGTTCGGGAATTTCGCGAACATATGTCCACATGTTCGAGAGCTGTACTGTAGTTGAACCAATCAAGTCCATTATACCTATTGGA	0	2	7	0	19	5	85	16	23	26	50	22	152	67	158	101	121	21
miR-9428	ATCTCTGCTGGAGTATGCTGCCTCTGGCTGGGCCTCCAGGAGCACCTTAGTAGAAATGAAAGCCTGTTATTGTGCTGTCTCTGATACAGTACCGCTCACGAACATAGGGACACTGTTCGGGAATTTCGCGAACATATGTCCACATGTTCGAGAGCTGTACTGTAGTTGAACCAATCAAGTCCATTATACCTATTGGAACTA	0	2	7	0	19	5	85	16	23	26	50	22	152	67	158	101	121	21
miR-9428	CCTCCAGGAGCACCTTAGTAGAAATGAAAGCCTGTTATTGTGCTGTCTCTGATACAGTACCGCTCACGAACATAGGGACACTGTTCGGGAATTTCGCGAACATATGTCCACATGTTCGAGAGCTGTACTGTAGTTGAACCAATCAAGTCCATTATACCTATTGGAACTACTCTCCACACTCTGGTGTCACTAGGGAGGATC	0	2	7	0	19	5	85	16	23	26	50	22	152	67	158	101	121	21
miR-9428	CTCCAGGAGCACCTTAGTAGAAATGAAAGCCTGTTATTGTGCTGTCTCTGATACAGTACCGCTCACGAACATAGGGACACTGTTCGGGAATTTCGCGAACATATGTCCACATGTTCGAGAGCTGTACTGTAGTTGAACCAATCAAGTCCATTATACCTATTGGAACTACTCTCCACACTCTGGTGTCACTAGGGAGGATCT	0	2	7	0	19	5	85	16	23	26	50	22	152	67	158	101	121	21
miR-9428	GATCTCTGCTGGAGTATGCTGCCTCTGGCTGGGCCTCCAGGAGCACCTTAGTAGAAATGAAAGCCTGTTATTGTGCTGTCTCTGATACAGTACCGCTCACGAACATAGGGACACTGTTCGGGAATTTCGCGAACATATGTCCACATGTTCGAGAGCTGTACTGTAGTTGAACCAATCAAGTCCATTATACCTATTGGAACT	0	2	7	0	19	5	85	16	23	26	50	22	152	67	158	101	121	21
miR-9428	GCCTCCAGGAGCACCTTAGTAGAAATGAAAGCCTGTTATTGTGCTGTCTCTGATACAGTACCGCTCACGAACATAGGGACACTGTTCGGGAATTTCGCGAACATATGTCCACATGTTCGAGAGCTGTACTGTAGTTGAACCAATCAAGTCCATTATACCTATTGGAACTACTCTCCACACTCTGGTGTCACTAGGGAGGAT	0	2	7	0	19	5	85	16	23	26	50	22	152	67	158	101	121	21
miR-9428	GGCCTCCAGGAGCACCTTAGTAGAAATGAAAGCCTGTTATTGTGCTGTCTCTGATACAGTACCGCTCACGAACATAGGGACACTGTTCGGGAATTTCGCGAACATATGTCCACATGTTCGAGAGCTGTACTGTAGTTGAACCAATCAAGTCCATTATACCTATTGGAACTACTCTCCACACTCTGGTGTCACTAGGGAGGA	0	2	7	0	19	5	85	16	23	26	50	22	152	67	158	101	121	21
miR-9428	GGGCCTCCAGGAGCACCTTAGTAGAAATGAAAGCCTGTTATTGTGCTGTCTCTGATACAGTACCGCTCACGAACATAGGGACACTGTTCGGGAATTTCGCGAACATATGTCCACATGTTCGAGAGCTGTACTGTAGTTGAACCAATCAAGTCCATTATACCTATTGGAACTACTCTCCACACTCTGGTGTCACTAGGGAGG	0	2	7	0	19	5	85	16	23	26	50	22	152	67	158	101	121	21
miR-9428	TAAAGATTTACTGTATTGTTAATAGATCTCTGCTGGAGTATGCTGCCTCTGGCTGGGCCTCCAGGAGCACCTTAGTAGAAATGAAAGCCTGTTATTGTGCTGTCTCTGATACAGTACCGCTCACGAACATAGGGACACTGTTCGGGAATTTCGCGAACATATGTCCACATGTTCGAGAGCTGTACTGTAGTTGAACCAATC	0	2	7	0	19	5	85	16	23	26	50	22	152	67	159	101	122	21
miR-9428	TAGATCTCTGCTGGAGTATGCTGCCTCTGGCTGGGCCTCCAGGAGCACCTTAGTAGAAATGAAAGCCTGTTATTGTGCTGTCTCTGATACAGTACCGCTCACGAACATAGGGACACTGTTCGGGAATTTCGCGAACATATGTCCACATGTTCGAGAGCTGTACTGTAGTTGAACCAATCAAGTCCATTATACCTATTGGAA	0	2	7	0	19	5	85	16	23	26	50	22	152	67	158	101	121	21
miR-9428	TGGGCCTCCAGGAGCACCTTAGTAGAAATGAAAGCCTGTTATTGTGCTGTCTCTGATACAGTACCGCTCACGAACATAGGGACACTGTTCGGGAATTTCGCGAACATATGTCCACATGTTCGAGAGCTGTACTGTAGTTGAACCAATCAAGTCCATTATACCTATTGGAACTACTCTCCACACTCTGGTGTCACTAGGGAG	0	2	7	0	19	5	85	16	23	26	50	22	152	67	158	101	121	21
miR-9428	AAAAGAGACCATAAGCATTGTCCAATACGCATGGGACTAACAGCCTAAAAGACACCATAAGCATTATCCAATACGCATGGGACATACAGTACCGCTCACGAACATAGGGACACTGTTCGCGAAACTTTCGCGAACAACGTTCACGAAATTCGCAAACATATAGACTGTTCACTAAATTCGCGAACATATAGACTGTTCGCG	0	0	1	0	7	2	36	4	13	4	22	2	70	16	47	7	29	1
miR-9428	AATTTGTTTTTTATTAATTTCGAATTGCACGCAATGGATGCGATCTATTCCTCGTTAATTAGAGTAATAAAACTGACAAACGACATACAGTACCGCTCACGAACATAGGGACACTGTTCGCGAAACTTTCGCGAACAACGTTCGCGAAGAATATCAAGCGATCGGCATTACTTCCCCAAACAAATTCTCCCGTGTCTAATA	0	0	1	0	7	2	38	4	13	4	22	2	70	16	48	7	30	1
miR-9428	ACAATATGTGAAGAAGGTTTGTATCTACTTTCCATCTCAAATTGTTTTAGTTGTTTTGATAGTCACATTACTGTGTCCTTTTGTTACAGTACCGCTCACGAACATAGGGACACTGTTCGCGAAAATTTCGCGAACAAGGTTCGCAAAATTCGCAAACATATAGACTGTTCGCCAAAAGGCTGTTCGCGAACAGATGCAAAA	0	0	1	0	7	2	36	4	13	4	22	2	70	16	47	7	29	1
miR-9428	ATACTTTTATAAATAGTGTAGTAGTGTAACTTGTGTAACTTTGTAATAGTGTGGGGTAATGGTTAGTTTTGTTACAGATATTAATTACAGTACCGCTCACGAACATAGGGACACTGTTCGCGAAACTTTCGCGAACATATAGACTGTTCGCGAACAGATACAAAATAAACGGTTTGACGAATGGTAACGTGTGATCCAGGG	0	0	1	0	7	2	36	4	13	4	22	2	70	16	47	7	29	1
miR-9428	ATATACTTTTATAAATAGTGTAGTAGTGTAACTTGTGTAACTTTGTAATAGTGTGGGGTAATGGTTAGTTTTGTTACAGATATTAATTACAGTACCGCTCACGAACATAGGGACACTGTTCGCGAAACTTTCGCGAACATATAGACTGTTCGCGAACAGATACAAAATAAACGGTTTGACGAATGGTAACGTGTGATCCAG	0	0	1	0	7	2	36	4	13	4	22	2	70	16	47	7	29	1
miR-9428	ATCCTTGAGTCTCATGTCAGTGTTTTTGGCTCTTTCGCATTTTGCAATATTTGTGTCGCTATGTTCATTTGCGTTATACAAATACTACAGTACCGCTCACGAACATAGGGACACTGTTCGCGAAACTTTCGCGAACATATGTCCACATGTTCTAGAGCGGTACTGTACACAATATTTATTTAGTTTTATTTATTTTTTAGG	0	0	1	0	7	2	36	4	14	4	24	3	70	17	51	7	33	4
miR-9428	ATGCACAATATGTGAAGAAGGTTTGTATCTACTTTCCATCTCAAATTGTTTTAGTTGTTTTGATAGTCACATTACTGTGTCCTTTTGTTACAGTACCGCTCACGAACATAGGGACACTGTTCGCGAAAATTTCGCGAACAAGGTTCGCAAAATTCGCAAACATATAGACTGTTCGCCAAAAGGCTGTTCGCGAACAGATGC	0	0	1	0	7	2	36	4	13	4	22	2	70	16	47	7	29	1
miR-9428	ATTAATTTGTTTTTTATTAATTTCGAATTGCACGCAATGGATGCGATCTATTCCTCGTTAATTAGAGTAATAAAACTGACAAACGACATACAGTACCGCTCACGAACATAGGGACACTGTTCGCGAAACTTTCGCGAACAACGTTCGCGAAGAATATCAAGCGATCGGCATTACTTCCCCAAACAAATTCTCCCGTGTCTA	0	0	1	0	7	2	38	4	13	4	22	2	70	16	48	7	30	1
miR-9428	ATTTGTTTTTTATTAATTTCGAATTGCACGCAATGGATGCGATCTATTCCTCGTTAATTAGAGTAATAAAACTGACAAACGACATACAGTACCGCTCACGAACATAGGGACACTGTTCGCGAAACTTTCGCGAACAACGTTCGCGAAGAATATCAAGCGATCGGCATTACTTCCCCAAACAAATTCTCCCGTGTCTAATAC	0	0	1	0	7	2	38	4	13	4	22	2	70	16	48	7	30	1
miR-9428	CACAATATGTGAAGAAGGTTTGTATCTACTTTCCATCTCAAATTGTTTTAGTTGTTTTGATAGTCACATTACTGTGTCCTTTTGTTACAGTACCGCTCACGAACATAGGGACACTGTTCGCGAAAATTTCGCGAACAAGGTTCGCAAAATTCGCAAACATATAGACTGTTCGCCAAAAGGCTGTTCGCGAACAGATGCAAA	0	0	1	0	7	2	36	4	13	4	22	2	70	16	47	7	29	1
miR-9428	CCTATCCTTGAGTCTCATGTCAGTGTTTTTGGCTCTTTCGCATTTTGCAATATTTGTGTCGCTATGTTCATTTGCGTTATACAAATACTACAGTACCGCTCACGAACATAGGGACACTGTTCGCGAAACTTTCGCGAACATATGTCCACATGTTCTAGAGCGGTACTGTACACAATATTTATTTAGTTTTATTTATTTTTT	0	0	1	0	7	2	36	4	14	4	24	3	70	17	51	7	33	4
miR-9428	CCTAAAAGAGACCATAAGCATTGTCCAATACGCATGGGACTAACAGCCTAAAAGACACCATAAGCATTATCCAATACGCATGGGACATACAGTACCGCTCACGAACATAGGGACACTGTTCGCGAAACTTTCGCGAACAACGTTCACGAAATTCGCAAACATATAGACTGTTCACTAAATTCGCGAACATATAGACTGTTC	0	0	1	0	7	2	36	4	13	4	22	2	70	16	47	7	29	1
miR-9428	CTAAAAGAGACCATAAGCATTGTCCAATACGCATGGGACTAACAGCCTAAAAGACACCATAAGCATTATCCAATACGCATGGGACATACAGTACCGCTCACGAACATAGGGACACTGTTCGCGAAACTTTCGCGAACAACGTTCACGAAATTCGCAAACATATAGACTGTTCACTAAATTCGCGAACATATAGACTGTTCG	0	0	1	0	7	2	36	4	13	4	22	2	70	16	47	7	29	1
miR-9428	CTATCCTTGAGTCTCATGTCAGTGTTTTTGGCTCTTTCGCATTTTGCAATATTTGTGTCGCTATGTTCATTTGCGTTATACAAATACTACAGTACCGCTCACGAACATAGGGACACTGTTCGCGAAACTTTCGCGAACATATGTCCACATGTTCTAGAGCGGTACTGTACACAATATTTATTTAGTTTTATTTATTTTTTA	0	0	1	0	7	2	36	4	14	4	24	3	70	17	51	7	33	4
miR-9428	CTTTCGCATTTTGCAATATTTGTGTCGCTATGTTCATTTGCGTTATACAAATACTACAGTACCGCTCACGAACATAGGGACACTGTTCGCGAAACTTTCGCGAACATATGTCCACATGTTCTAGAGCGGTACTGTACACAATATTTATTTAGTTTTATTTATTTTTTAGGTAACTCAATTGTTACTTTTTTACTTTTTTCA	0	0	1	0	7	2	36	4	14	4	24	3	70	17	51	7	33	4
miR-9428	GCACAATATGTGAAGAAGGTTTGTATCTACTTTCCATCTCAAATTGTTTTAGTTGTTTTGATAGTCACATTACTGTGTCCTTTTGTTACAGTACCGCTCACGAACATAGGGACACTGTTCGCGAAAATTTCGCGAACAAGGTTCGCAAAATTCGCAAACATATAGACTGTTCGCCAAAAGGCTGTTCGCGAACAGATGCAA	0	0	1	0	7	2	36	4	13	4	22	2	70	16	47	7	29	1
miR-9428	GCCTAAAAGAGACCATAAGCATTGTCCAATACGCATGGGACTAACAGCCTAAAAGACACCATAAGCATTATCCAATACGCATGGGACATACAGTACCGCTCACGAACATAGGGACACTGTTCGCGAAACTTTCGCGAACAACGTTCACGAAATTCGCAAACATATAGACTGTTCACTAAATTCGCGAACATATAGACTGTT	0	0	1	0	7	2	36	4	13	4	22	2	70	16	47	7	29	1
miR-9428	TAAAAGAGACCATAAGCATTGTCCAATACGCATGGGACTAACAGCCTAAAAGACACCATAAGCATTATCCAATACGCATGGGACATACAGTACCGCTCACGAACATAGGGACACTGTTCGCGAAACTTTCGCGAACAACGTTCACGAAATTCGCAAACATATAGACTGTTCACTAAATTCGCGAACATATAGACTGTTCGC	0	0	1	0	7	2	36	4	13	4	22	2	70	16	47	7	29	1
miR-9428	TAATTTGTTTTTTATTAATTTCGAATTGCACGCAATGGATGCGATCTATTCCTCGTTAATTAGAGTAATAAAACTGACAAACGACATACAGTACCGCTCACGAACATAGGGACACTGTTCGCGAAACTTTCGCGAACAACGTTCGCGAAGAATATCAAGCGATCGGCATTACTTCCCCAAACAAATTCTCCCGTGTCTAAT	0	0	1	0	7	2	38	4	13	4	22	2	70	16	48	7	30	1
miR-9428	TACTTTTATAAATAGTGTAGTAGTGTAACTTGTGTAACTTTGTAATAGTGTGGGGTAATGGTTAGTTTTGTTACAGATATTAATTACAGTACCGCTCACGAACATAGGGACACTGTTCGCGAAACTTTCGCGAACATATAGACTGTTCGCGAACAGATACAAAATAAACGGTTTGACGAATGGTAACGTGTGATCCAGGGC	0	0	1	0	7	2	36	4	13	4	22	2	70	16	47	7	29	1
miR-9428	TATATACTTTTATAAATAGTGTAGTAGTGTAACTTGTGTAACTTTGTAATAGTGTGGGGTAATGGTTAGTTTTGTTACAGATATTAATTACAGTACCGCTCACGAACATAGGGACACTGTTCGCGAAACTTTCGCGAACATATAGACTGTTCGCGAACAGATACAAAATAAACGGTTTGACGAATGGTAACGTGTGATCCA	0	0	1	0	7	2	36	4	13	4	22	2	70	16	47	7	29	1
miR-9428	TATACTTTTATAAATAGTGTAGTAGTGTAACTTGTGTAACTTTGTAATAGTGTGGGGTAATGGTTAGTTTTGTTACAGATATTAATTACAGTACCGCTCACGAACATAGGGACACTGTTCGCGAAACTTTCGCGAACATATAGACTGTTCGCGAACAGATACAAAATAAACGGTTTGACGAATGGTAACGTGTGATCCAGG	0	0	1	0	7	2	36	4	13	4	22	2	70	16	47	7	29	1
miR-9428	TATCCTTGAGTCTCATGTCAGTGTTTTTGGCTCTTTCGCATTTTGCAATATTTGTGTCGCTATGTTCATTTGCGTTATACAAATACTACAGTACCGCTCACGAACATAGGGACACTGTTCGCGAAACTTTCGCGAACATATGTCCACATGTTCTAGAGCGGTACTGTACACAATATTTATTTAGTTTTATTTATTTTTTAG	0	0	1	0	7	2	36	4	14	4	24	3	70	17	51	7	33	4
miR-9428	TCCTTGAGTCTCATGTCAGTGTTTTTGGCTCTTTCGCATTTTGCAATATTTGTGTCGCTATGTTCATTTGCGTTATACAAATACTACAGTACCGCTCACGAACATAGGGACACTGTTCGCGAAACTTTCGCGAACATATGTCCACATGTTCTAGAGCGGTACTGTACACAATATTTATTTAGTTTTATTTATTTTTTAGGT	0	0	1	0	7	2	36	4	14	4	24	3	70	17	51	7	33	4
miR-9428	TCCTCGTTAATTAGAGTAATAAAACTGACAAACGACATACAGTACCGCTCACGAACATAGGGACACTGTTCGCGAAACTTTCGCGAACAACGTTCGCGAAGAATATCAAGCGATCGGCATTACTTCCCCAAACAAATTCTCCCGTGTCTAATACAAGTTTTTGTCAAATAAATGGCTTCCCAGTGTTCAAAAGGATTGGCT	0	0	1	0	7	2	38	4	13	4	22	2	70	16	49	7	30	1
miR-9428	TCGTTAATTAGAGTAATAAAACTGACAAACGACATACAGTACCGCTCACGAACATAGGGACACTGTTCGCGAAACTTTCGCGAACAACGTTCGCGAAGAATATCAAGCGATCGGCATTACTTCCCCAAACAAATTCTCCCGTGTCTAATACAAGTTTTTGTCAAATAAATGGCTTCCCAGTGTTCAAAAGGATTGGCTAGC	0	0	1	0	7	2	38	4	13	4	22	2	70	16	49	7	30	1
miR-9428	TGCACAATATGTGAAGAAGGTTTGTATCTACTTTCCATCTCAAATTGTTTTAGTTGTTTTGATAGTCACATTACTGTGTCCTTTTGTTACAGTACCGCTCACGAACATAGGGACACTGTTCGCGAAAATTTCGCGAACAAGGTTCGCAAAATTCGCAAACATATAGACTGTTCGCCAAAAGGCTGTTCGCGAACAGATGCA	0	0	1	0	7	2	36	4	13	4	22	2	70	16	47	7	29	1
miR-9428	TTAATTTGTTTTTTATTAATTTCGAATTGCACGCAATGGATGCGATCTATTCCTCGTTAATTAGAGTAATAAAACTGACAAACGACATACAGTACCGCTCACGAACATAGGGACACTGTTCGCGAAACTTTCGCGAACAACGTTCGCGAAGAATATCAAGCGATCGGCATTACTTCCCCAAACAAATTCTCCCGTGTCTAA	0	0	1	0	7	2	38	4	13	4	22	2	70	16	48	7	30	1
miR-9428	TTCGCATTTTGCAATATTTGTGTCGCTATGTTCATTTGCGTTATACAAATACTACAGTACCGCTCACGAACATAGGGACACTGTTCGCGAAACTTTCGCGAACATATGTCCACATGTTCTAGAGCGGTACTGTACACAATATTTATTTAGTTTTATTTATTTTTTAGGTAACTCAATTGTTACTTTTTTACTTTTTTCAAT	0	0	1	0	7	2	36	4	14	4	24	3	70	17	51	7	33	4
miR-2043	AAGACAAGAGGAATCTATCAAGAGTCAAATAGAATGACACTTCAAGAGACAGTATCTGATATCGAATCTCTTATATCGCCTTTTGAGGTTATTTTCTTAATGCCCTCAAAAGACGGTATTAGAGATTACACAGCTGGACAATCGTTGTTTGAGGATGCAGTGAGGATCAAAGTCTCATACGAAGATGCACCGACTGCTTGG	6	1	5	0	32	6	122	34	39	33	41	12	81	28	78	23	29	6
miR-2043	AAGACAAGAGGAATCTATCACGAGTCAAGCAGAATGACACTTCAAGAGACAGTATCTAATATCGAATCTCTTATATCGCCTTTTGAGGTTATTTTCTTAATACCCTCAAAAGACGGTATTAGAGATTACACAGCTAAACAATCGCTGTGTGAAGATGCAGTAAGGATCAAAATGTCATACGAAGATGCACCGACTGCTTGG	6	1	6	0	33	7	139	34	41	32	50	12	86	27	92	23	35	6
miR-2043	AAGACAAGAGGAACCTATCACGAGTCAAATAGAATGACACTCCAAGAGACCGTATCTGATATCGAATCTCTTATATCGCCTTTTGAGGTTATTTTCTTAATACCCTCAAAAGACGGTATTAGAGATTACACAGCTGGACAATCGTTGCTTGAGGATGCAGTGAGGATCAAAGTCTCATACGAAGATGCACCGACTGCTTGG	6	1	6	0	33	7	139	34	41	32	50	12	86	27	92	23	35	6
miR-2043	AGACAAGAGGAACCTATCACGAGTCAAATAGAATGACACTCCAAGAGACCGTATCTGATATCGAATCTCTTATATCGCCTTTTGAGGTTATTTTCTTAATACCCTCAAAAGACGGTATTAGAGATTACACAGCTGGACAATCGTTGCTTGAGGATGCAGTGAGGATCAAAGTCTCATACGAAGATGCACCGACTGCTTGGC	6	1	6	0	33	7	139	34	41	32	50	12	86	27	92	23	35	6
miR-2043	AGACAAGAGGAATCTATCACGAGTCAAGCAGAATGACACTTCAAGAGACAGTATCTAATATCGAATCTCTTATATCGCCTTTTGAGGTTATTTTCTTAATACCCTCAAAAGACGGTATTAGAGATTACACAGCTAAACAATCGCTGTGTGAAGATGCAGTAAGGATCAAAATGTCATACGAAGATGCACCGACTGCTTGGC	6	1	6	0	33	7	139	34	41	32	50	12	86	27	92	23	35	6
miR-2043	AGACAAGAGGAATCTATCAAGAGTCAAATAGAATGACACTTCAAGAGACAGTATCTGATATCGAATCTCTTATATCGCCTTTTGAGGTTATTTTCTTAATGCCCTCAAAAGACGGTATTAGAGATTACACAGCTGGACAATCGTTGTTTGAGGATGCAGTGAGGATCAAAGTCTCATACGAAGATGCACCGACTGCTTGGC	6	1	5	0	32	6	122	34	39	33	41	12	81	28	78	23	29	6
miR-2043	AGTTTTGCTTTGATTAAGTGTTTCCATTGAAGACAAGAGGAATCTATCAAGAGTCAAATAGAATGACACTTCAAGAGACAGTATCTGATATCGAATCTCTTATATCGCCTTTTGAGGTTATTTTCTTAATGCCCTCAAAAGACGGTATTAGAGATTACACAGCTGGACAATCGTTGTTTGAGGATGCAGTGAGGATCAAAG	6	1	5	0	32	6	122	34	39	33	41	12	81	28	78	23	29	6
miR-2043	AGTTTTGCTTTGATTAAGTGTTTCCATTGAAGACAAGAGGAACCTATCACGAGTCAAATAGAATGACACTCCAAGAGACCGTATCTGATATCGAATCTCTTATATCGCCTTTTGAGGTTATTTTCTTAATACCCTCAAAAGACGGTATTAGAGATTACACAGCTGGACAATCGTTGCTTGAGGATGCAGTGAGGATCAAAG	6	1	6	0	33	7	139	34	41	32	50	12	86	27	92	23	35	6
miR-2043	AGTTTTGCTTTGATTAAGTGTTTCCATTGAAGACAAGAGGAATCTATCACGAGTCAAGCAGAATGACACTTCAAGAGACAGTATCTAATATCGAATCTCTTATATCGCCTTTTGAGGTTATTTTCTTAATACCCTCAAAAGACGGTATTAGAGATTACACAGCTAAACAATCGCTGTGTGAAGATGCAGTAAGGATCAAAA	6	1	6	0	33	7	139	34	41	32	50	12	86	27	92	23	35	6
miR-2043	GTTTTGCTTTGATTAAGTGTTTCCATTGAAGACAAGAGGAACCTATCACGAGTCAAATAGAATGACACTCCAAGAGACCGTATCTGATATCGAATCTCTTATATCGCCTTTTGAGGTTATTTTCTTAATACCCTCAAAAGACGGTATTAGAGATTACACAGCTGGACAATCGTTGCTTGAGGATGCAGTGAGGATCAAAGT	6	1	6	0	33	7	139	34	41	32	50	12	86	27	92	23	35	6
miR-2043	GTTTTGCTTTGATTAAGTGTTTCCATTGAAGACAAGAGGAATCTATCACGAGTCAAGCAGAATGACACTTCAAGAGACAGTATCTAATATCGAATCTCTTATATCGCCTTTTGAGGTTATTTTCTTAATACCCTCAAAAGACGGTATTAGAGATTACACAGCTAAACAATCGCTGTGTGAAGATGCAGTAAGGATCAAAAT	6	1	6	0	33	7	139	34	41	32	50	12	86	27	92	23	35	6
miR-2043	GTTTTGCTTTGATTAAGTGTTTCCATTGAAGACAAGAGGAATCTATCAAGAGTCAAATAGAATGACACTTCAAGAGACAGTATCTGATATCGAATCTCTTATATCGCCTTTTGAGGTTATTTTCTTAATGCCCTCAAAAGACGGTATTAGAGATTACACAGCTGGACAATCGTTGTTTGAGGATGCAGTGAGGATCAAAGT	6	1	5	0	32	6	122	34	39	33	41	12	81	28	78	23	29	6
miR-2035	AAAGGCGCCATTTCATATGTGCACTTTGCAGATTGAGCGTCCCACATTGAATGAATAATCGGAAATCCTTGGATATAAATAAGATTACTGTCTGTGGCGTATTACATGGTCTGTTACAAGGGATGAAGTGCTCGAGTTTCGAGTTCCCTTGTGACAGCCCATGGGAGAATTTGCGGCTTGCGGGGTTATCCTAACATACGT	1	1	4	0	72	2	147	8	86	9	55	4	50	10	62	3	61	1
miR-2035	ACATTGAATGAATAATCGGAAATCCTTGGATATAAATAAGATTACTGTCTGTGGCGTATTACATGGTCTGTTACAAGGGATGAAGTGCTCGAGTTTCGAGTTCCCTTGTGACAGCCCATGGGAGAATTTGCGGCTTGCGGGGTTATCCTAACATACGTCATACATAAAAAGCAATCGAGCAAGTAAGCTACCAAGTTTGCT	1	1	4	0	72	2	147	8	86	9	55	4	50	10	62	3	61	1
miR-2035	ACATTGAATGAATAATCGGAAATCCTTGGATATAAATAAGATTACTGTCTGTGGCGTATTACATGGTCTGTTACAAGGGATGAAGTGCTCGAGTTTCGAGTTCCCTTGTGACAGCCCATGGGAGAATTTGCGGCTTGCGGGGTTATCCTAACATACGTCATACATAAAAAGCAAGCGAGCAAGTAAGCTACCAAGTTTGCT	1	1	4	0	72	2	147	8	86	9	55	4	50	10	62	3	61	1
miR-2035	AGGCGCCATTTCATATGTGCACTTTGCAGATTGAGCGTCCCACATTGAATGAATAATCGGAAATCCTTGGATATAAATAAGATTACTGTCTGTGGCGTATTACATGGTCTGTTACAAGGGATGAAGTGCTCGAGTTTCGAGTTCCCTTGTGACAGCCCATGGGAGAATTTGCGGCTTGCGGGGTTATCCTAACATACGTCA	1	1	4	0	72	2	147	8	86	9	55	4	50	10	62	3	61	1
miR-2035	ATTTCATATGTGCACTTTGCAGATTGAGCGTCCCACATTGAATGAATAATCGGAAATCCTTGGATATAAATAAGATTACTGTCTGTGGCGTATTACATGGTCTGTTACAAGGGATGAAGTGCTCGAGTTTCGAGTTCCCTTGTGACAGCCCATGGGAGAATTTGCGGCTTGCGGGGTTATCCTAACATACGTCATACATAA	1	1	4	0	72	2	147	8	86	9	55	4	50	10	62	3	61	1
miR-2035	CATTGAATGAATAATCGGAAATCCTTGGATATAAATAAGATTACTGTCTGTGGCGTATTACATGGTCTGTTACAAGGGATGAAGTGCTCGAGTTTCGAGTTCCCTTGTGACAGCCCATGGGAGAATTTGCGGCTTGCGGGGTTATCCTAACATACGTCATACATAAAAAGCAAGCGAGCAAGTAAGCTACCAAGTTTGCTT	1	1	4	0	72	2	147	8	86	9	55	4	50	10	62	3	61	1
miR-2035	CATTGAATGAATAATCGGAAATCCTTGGATATAAATAAGATTACTGTCTGTGGCGTATTACATGGTCTGTTACAAGGGATGAAGTGCTCGAGTTTCGAGTTCCCTTGTGACAGCCCATGGGAGAATTTGCGGCTTGCGGGGTTATCCTAACATACGTCATACATAAAAAGCAATCGAGCAAGTAAGCTACCAAGTTTGCTT	1	1	4	0	72	2	147	8	86	9	55	4	50	10	62	3	61	1
miR-2035	GAATGAATAATCGGAAATCCTTGGATATAAATAAGATTACTGTCTGTGGCGTATTACATGGTCTGTTACAAGGGATGAAGTGCTCGAGTTTCGAGTTCCCTTGTGACAGCCCATGGGAGAATTTGCGGCTTGCGGGGTTATCCTAACATACGTCATACATAAAAAGCAAGCGAGCAAGTAAGCTACCAAGTTTGCTTGGTT	1	1	4	0	72	2	147	8	86	9	55	4	50	10	62	3	61	1
miR-2035	GAATGAATAATCGGAAATCCTTGGATATAAATAAGATTACTGTCTGTGGCGTATTACATGGTCTGTTACAAGGGATGAAGTGCTCGAGTTTCGAGTTCCCTTGTGACAGCCCATGGGAGAATTTGCGGCTTGCGGGGTTATCCTAACATACGTCATACATAAAAAGCAATCGAGCAAGTAAGCTACCAAGTTTGCTTGGTT	1	1	4	0	72	2	147	8	86	9	55	4	50	10	62	3	61	1
miR-2035	GCGCCATTTCATATGTGCACTTTGCAGATTGAGCGTCCCACATTGAATGAATAATCGGAAATCCTTGGATATAAATAAGATTACTGTCTGTGGCGTATTACATGGTCTGTTACAAGGGATGAAGTGCTCGAGTTTCGAGTTCCCTTGTGACAGCCCATGGGAGAATTTGCGGCTTGCGGGGTTATCCTAACATACGTCATA	1	1	4	0	72	2	147	8	86	9	55	4	50	10	62	3	61	1
miR-2035	GGAAATCCTTGGATATAAATAAGATTACTGTCTGTGGCGTATTACATGGTCTGTTACAAGGGATGAAGTGCTCGAGTTTCGAGTTCCCTTGTGACAGCCCATGGGAGAATTTGCGGCTTGCGGGGTTATCCTAACATACGTCATACATAAAAAGCAAGCGAGCAAGTAAGCTACCAAGTTTGCTTGGTTGTTGTTAAGTAT	1	1	4	0	72	2	147	8	86	9	55	4	50	10	62	3	61	1
miR-2035	GGAAATCCTTGGATATAAATAAGATTACTGTCTGTGGCGTATTACATGGTCTGTTACAAGGGATGAAGTGCTCGAGTTTCGAGTTCCCTTGTGACAGCCCATGGGAGAATTTGCGGCTTGCGGGGTTATCCTAACATACGTCATACATAAAAAGCAATCGAGCAAGTAAGCTACCAAGTTTGCTTGGTTGATGTTAAGTAT	1	1	4	0	72	2	147	8	86	9	55	4	50	10	62	3	61	1
miR-2035	GGCGCCATTTCATATGTGCACTTTGCAGATTGAGCGTCCCACATTGAATGAATAATCGGAAATCCTTGGATATAAATAAGATTACTGTCTGTGGCGTATTACATGGTCTGTTACAAGGGATGAAGTGCTCGAGTTTCGAGTTCCCTTGTGACAGCCCATGGGAGAATTTGCGGCTTGCGGGGTTATCCTAACATACGTCAT	1	1	4	0	72	2	147	8	86	9	55	4	50	10	62	3	61	1
miR-2035	TTGAATGAATAATCGGAAATCCTTGGATATAAATAAGATTACTGTCTGTGGCGTATTACATGGTCTGTTACAAGGGATGAAGTGCTCGAGTTTCGAGTTCCCTTGTGACAGCCCATGGGAGAATTTGCGGCTTGCGGGGTTATCCTAACATACGTCATACATAAAAAGCAAGCGAGCAAGTAAGCTACCAAGTTTGCTTGG	1	1	4	0	72	2	147	8	86	9	55	4	50	10	62	3	61	1
miR-2035	TTGAATGAATAATCGGAAATCCTTGGATATAAATAAGATTACTGTCTGTGGCGTATTACATGGTCTGTTACAAGGGATGAAGTGCTCGAGTTTCGAGTTCCCTTGTGACAGCCCATGGGAGAATTTGCGGCTTGCGGGGTTATCCTAACATACGTCATACATAAAAAGCAATCGAGCAAGTAAGCTACCAAGTTTGCTTGG	1	1	4	0	72	2	147	8	86	9	55	4	50	10	62	3	61	1
miR-9429	AAGATAATAGCTGACGAGATGTGGAAATCGGGGAGCCGGGAGACGCAAAAGAGGATAAGTCTCCCTAAAAGCACCTTCTCCATTAGACGAAATAGACTTATTTCGTCTATATGGAGAAAGGCGCTTTTAGGGAAGTAGATATCAAATCCATTTGAAGAGAAGTGATCTAATGTCTGGTAACACCATGAACGATGACACAGA	0	0	3	1	0	0	0	0	0	0	0	0	0	0	83	38	1	0
miR-9429	AGATAATAGCTGACGAGATGTGGAAATCGGGGAGCCGGGAGACGCAAAAGAGGATAAGTCTCCCTAAAAGCACCTTCTCCATTAGACGAAATAGACTTATTTCGTCTATATGGAGAAAGGCGCTTTTAGGGAAGTAGATATCAAATCCATTTGAAGAGAAGTGATCTAATGTCTGGTAACACCATGAACGATGACACAGAC	0	0	3	1	0	0	0	0	0	0	0	0	0	0	83	38	1	0
miR-9429	AGCAAACTTGGAAGATAATGATTAATCCAAGATAATAGCTGACGAGATGTGGAAATCGGGGAGCCGGGAGACGCAAAAGAGGATAAGTCTCCCTAAAAGCACCTTCTCCATTAGACGAAATAGACTTATTTCGTCTATATGGAGAAAGGCGCTTTTAGGGAAGTAGATATCAAATCCATTTGAAGAGAAGTGATCTAATGT	0	0	3	1	0	0	0	0	0	0	0	0	0	0	83	38	1	0
miR-9430	TACACATCGTTGGATTGTTATACGGTTTGTGGCGGAATCCTCACAGGAACCTAACGCAACAACTACCTATCCCAATAAGGAATAGACTAAAAACTGGATTGTCAGTGTTTGCTCATCATTTCTCAATAAAGGAAATGGAATTTCATAACGCCTGATTTCGCTTAAACGACGCCTTTCGAAAGAGTTCTCGAAAAAGGAAAT	4	7	4	6	7	9	56	33	12	30	21	28	60	87	19	8	27	21
miR-9430	TTTACACATCGTTGGATTGTTATACGGTTTGTGGCGGAATCCTCACAGGAACCTAACGCAACAACTACCTATCCCAATAAGGAATAGACTAAAAACTGGATTGTCAGTGTTTGCTCATCATTTCTCAATAAAGGAAATGGAATTTCATAACGCCTGATTTCGCTTAAACGACGCCTTTCGAAAGAGTTCTCGAAAAAGGAA	4	7	4	6	7	9	56	33	11	30	21	28	60	87	19	11	29	21
miR-9431	AGTTAAAGACATTGGACGAAAAAATACGGAATACGGAGCACACTAGCATACACATATTAGCACCAGTCGCGCTAAGCTTAGCTTTAGATCCCACATGGATAAGCTGTGGTTTAAAGCACTTTGTCCGAGTCGAATTCGCCCTGCAGTTTATTGCCGATAAAGTTTATCTAAGGCAAACCGCTATGCCATGTTGATGAGTCC	1	0	0	0	2	0	1	0	0	0	1	0	7	0	54	1	43	0
miR-9431	GAGTTAAAGACATTGGACGAAAAAATACGGAATACGGAGCACACTAGCATACACATATTAGCACCAGTCGCGCTAAGCTTAGCTTTAGATCCCACATGGATAAGCTGTGGTTTAAAGCACTTTGTCCGAGTCGAATTCGCCCTGCAGTTTATTGCCGATAAAGTTTATCTAAGGCAAACCGCTATGCCATGTTGATGAGTC	1	0	0	0	2	0	1	0	0	0	1	0	7	0	54	1	43	0
miR-9424b	GTTGAGGTGTTCACGTGTGCTGTCGAGGCTGTAATTGAAACAGTCTTGGACATACCGTCATTTAAGACTGCCTCGATGAGCCAACTATACAGATATCTGTAAAGCTGGTTTATCGAGGCAGTCTTTAAGGACGGTGTCTGATGAGCTTGCAGCGCCTCGCATCTCATTGTGGTCTTTTCCTCTGATATTGAACATCAGAAC	0	0	0	1	0	0	0	0	2	0	2	4	2	2	54	37	2	2
miR-9424b	TGTTGAGGTGTTCACGTGTGCTGTCGAGGCTGTAATTGAAACAGTCTTGGACATACCGTCATTTAAGACTGCCTCGATGAGCCAACTATACAGATATCTGTAAAGCTGGTTTATCGAGGCAGTCTTTAAGGACGGTGTCTGATGAGCTTGCAGCGCCTCGCATCTCATTGTGGTCTTTTCCTCTGATATTGAACATCAGAA	0	0	0	1	0	0	0	0	2	0	2	4	2	2	54	37	2	2
miR-9432	GATGTTGATGTTGTTTCGGGCGAGGAGCCGGTAGCCCATGTGCTCGGACGGGAGAAGAAACAAGACCACCCGCAAGGCGGCGAAAGGCCTAGGTCGTAAGAATAACCGAAGGATTTGGAGGTGATATAAGTTGGTTTCTCTTTTCTTCGGTCTGCGTTTGTGTTTTTAGAAATTTTCAAACACGGTTATCTTATTATGGAC	17	23	17	32	43	92	22	52	40	21	3	12	6	8	0	0	6	13
miR-9432	GTTGATGTTGTTTCGGGCGAGGAGCCGGTAGCCCATGTGCTCGGACGGGAGAAGAAACAAGACCACCCGCAAGGCGGCGAAAGGCCTAGGTCGTAAGAATAACCGAAGGATTTGGAGGTGATATAAGTTGGTTTCTCTTTTCTTCGGTCTGCGTTTGTGTTTTTAGAAATTTTCAAACACGGTTATCTTATTATGGACTCA	17	23	17	32	43	92	22	52	40	21	3	12	6	8	0	0	6	13
miR-9432	TGATGTTGATGTTGTTTCGGGCGAGGAGCCGGTAGCCCATGTGCTCGGACGGGAGAAGAAACAAGACCACCCGCAAGGCGGCGAAAGGCCTAGGTCGTAAGAATAACCGAAGGATTTGGAGGTGATATAAGTTGGTTTCTCTTTTCTTCGGTCTGCGTTTGTGTTTTTAGAAATTTTCAAACACGGTTATCTTATTATGGA	17	23	17	32	43	92	22	52	40	21	3	12	6	8	0	0	6	13
miR-9432	TTTCATTTAGATGGCTGAAGTCTAATACTAGTAGCGGTAGCTGATGTTGATGTTGTTTCGGGCGAGGAGCCGGTAGCCCATGTGCTCGGACGGGAGAAGAAACAAGACCACCCGCAAGGCGGCGAAAGGCCTAGGTCGTAAGAATAACCGAAGGATTTGGAGGTGATATAAGTTGGTTTCTCTTTTCTTCGGTCTGCGTTT	16	24	19	33	45	93	22	53	40	21	3	12	6	8	0	0	6	15
miR-2045	AAAACTCCTCGTCTTCTACTGTACCTGCAATAGCAAAGTGCTCCATACAGTAACTTTATTTAATGATACAAAATTTATGTCTTATTAATGACAATAGTTTTCCCAGAGTGTTGAGTTCATACAAGATTTCTTGTGCTTGTATGGTAATTAATCTCTGGTACATAGATTCCATAAAATACATTGACTGAAATTGTCCAGCCT	3	1	0	1	21	8	63	25	16	31	30	19	70	58	23	3	9	1
miR-2045	AAACTCCTCGTCTTCTACTGTACCTGCAATAGCAAAGTGCTCCATACAGTAACTTTATTTAATGATACAAAATTTATGTCTTATTAATGACAATAGTTTTCCCAGAGTGTTGAGTTCATACAAGATTTCTTGTGCTTGTATGGTAATTAATCTCTGGTACATAGATTCCATAAAATACATTGACTGAAATTGTCCAGCCTA	3	1	0	1	21	8	63	25	16	31	30	19	70	58	23	3	9	1
miR-2045	AACTCCTCGTCTTCTACTGTACCTGCAATAGCAAAGTGCTCCATACAGTAACTTTATTTAATGATACAAAATTTATGTCTTATTAATGACAATAGTTTTCCCAGAGTGTTGAGTTCATACAAGATTTCTTGTGCTTGTATGGTAATTAATCTCTGGTACATAGATTCCATAAAATACATTGACTGAAATTGTCCAGCCTAT	3	1	0	1	21	8	63	25	16	31	30	19	70	58	23	3	9	1
miR-2045	GCTCCATACAGTAACTTTATTTAATGATACAAAATTTATGTCTTATTAATGACAATAGTTTTCCCAGAGTGTTGAGTTCATACAAGATTTCTTGTGCTTGTATGGTAATTAATCTCTGGTACATAGATTCCATAAAATACATTGACTGAAATTGTCCAGCCTATATTGGTTGTGGCCTTCTCTCTTTGCTATTTATGGAAC	3	1	0	1	21	8	63	25	16	31	30	19	70	58	23	3	9	1
miR-2045	TGCTCCATACAGTAACTTTATTTAATGATACAAAATTTATGTCTTATTAATGACAATAGTTTTCCCAGAGTGTTGAGTTCATACAAGATTTCTTGTGCTTGTATGGTAATTAATCTCTGGTACATAGATTCCATAAAATACATTGACTGAAATTGTCCAGCCTATATTGGTTGTGGCCTTCTCTCTTTGCTATTTATGGAA	3	1	0	1	21	8	63	25	16	31	30	19	70	58	23	3	9	1
miR-2050	ATCGTAGGTCTATACAGAGATGCGAGTAATCGTCGAGTGTAGAACCTCGGTCATTTCATGGCGCGAGAACCCGGGTCCCAGTCATCAAACGTCATTGCACATTTGATTGCTGTGATCTGGTTTTCCGTGTCGATGTATAACAGGGAAAAGGTGGTTGGCGAGAGTAAGTAGTAGCCATTCCTAGTGTATTTGTATCGGTAA	0	1	0	0	1	0	15	2	1	3	3	9	100	87	39	31	43	23
miR-2050	GTAGGTCTATACAGAGATGCGAGTAATCGTCGAGTGTAGAACCTCGGTCATTTCATGGCGCGAGAACCCGGGTCCCAGTCATCAAACGTCATTGCACATTTGATTGCTGTGATCTGGTTTTCCGTGTCGATGTATAACAGGGAAAAGGTGGTTGGCGAGAGTAAGTAGTAGCCATTCCTAGTGTATTTGTATCGGTAAGGA	0	1	0	0	1	0	15	2	1	3	3	9	100	87	39	31	43	23
miR-2050	TCGTAGGTCTATACAGAGATGCGAGTAATCGTCGAGTGTAGAACCTCGGTCATTTCATGGCGCGAGAACCCGGGTCCCAGTCATCAAACGTCATTGCACATTTGATTGCTGTGATCTGGTTTTCCGTGTCGATGTATAACAGGGAAAAGGTGGTTGGCGAGAGTAAGTAGTAGCCATTCCTAGTGTATTTGTATCGGTAAG	0	1	0	0	1	0	15	2	1	3	3	9	100	87	39	31	43	23
miR-2051	CAGCTTCGAGACGAGTCGGAAAAGGAAAAGAAAAAAACACACGACATGTACGGGCCCGCCTATGAAAATAGAAAAGCTTCCGGTTTTTTGACATCGCAATACCGGAGTCTTTTCTGTGTCCATATTCGTGACCAGAATCAATTTAGAGATTTGGAGTTCGACATCCTACAAAGTGCTGCTTGTTACATCAGGTGGTTTGTT	0	0	2	1	1	0	2	0	0	0	1	1	4	0	58	23	1	0
miR-2051	GTTACATCAGATGAATTGGTTTGCTGCAACGACTTCAGCTTCGAGACGAGTCGGAAAAGGAAAAGAAAAAAACACACGACATGTACGGGCCCGCCTATGAAAATAGAAAAGCTTCCGGTTTTTTGACATCGCAATACCGGAGTCTTTTCTGTGTCCATATTCGTGACCAGAATCAATTTAGAGATTTGGAGTTCGACATCC	0	0	2	1	1	0	2	0	0	0	1	1	4	0	58	23	1	0
miR-2051	TCAGCTTCGAGACGAGTCGGAAAAGGAAAAGAAAAAAACACACGACATGTACGGGCCCGCCTATGAAAATAGAAAAGCTTCCGGTTTTTTGACATCGCAATACCGGAGTCTTTTCTGTGTCCATATTCGTGACCAGAATCAATTTAGAGATTTGGAGTTCGACATCCTACAAAGTGCTGCTTGTTACATCAGGTGGTTTGT	0	0	2	1	1	0	2	0	0	0	1	1	4	0	58	23	1	0
miR-2051	TGTTACATCAGATGAATTGGTTTGCTGCAACGACTTCAGCTTCGAGACGAGTCGGAAAAGGAAAAGAAAAAAACACACGACATGTACGGGCCCGCCTATGAAAATAGAAAAGCTTCCGGTTTTTTGACATCGCAATACCGGAGTCTTTTCTGTGTCCATATTCGTGACCAGAATCAATTTAGAGATTTGGAGTTCGACATC	0	0	2	1	1	0	2	0	0	0	1	1	4	0	58	23	1	0
miR-2051	TTACATCAGATGAATTGGTTTGCTGCAACGACTTCAGCTTCGAGACGAGTCGGAAAAGGAAAAGAAAAAAACACACGACATGTACGGGCCCGCCTATGAAAATAGAAAAGCTTCCGGTTTTTTGACATCGCAATACCGGAGTCTTTTCTGTGTCCATATTCGTGACCAGAATCAATTTAGAGATTTGGAGTTCGACATCCT	0	0	2	1	1	0	2	0	0	0	1	1	4	0	58	23	1	0
miR-9433	AAATGTAATAAATTCAATCCAACGTGATAGAGTACTTGTAGCCGACTATTATTTCCACGTTTAAGAGATTTAGAACGCATTTGGGGCCGTTTAAGCGATGTTCGGTGAAATTTAGAACCACTAAGTGATATAGGGAATTCTAAATTTCACCGTACGCTAAAACGGCTGTTAATAGTTACCGTAAGGTGATAATATGTAATT	0	0	0	0	0	0	19	0	7	5	13	1	32	4	36	0	48	1
miR-9433	AATGTAATAAATTCAATCCAACGTGATAGAGTACTTGTAGCCGACTATTATTTCCACGTTTAAGAGATTTAGAACGCATTTGGGGCCGTTTAAGCGATGTTCGGTGAAATTTAGAACCACTAAGTGATATAGGGAATTCTAAATTTCACCGTACGCTAAAACGGCTGTTAATAGTTACCGTAAGGTGATAATATGTAATTA	0	0	0	0	0	0	19	0	7	5	13	1	32	4	36	0	48	1
miR-9433	ATGTAATAAATTCAATCCAACGTGATAGAGTACTTGTAGCCGACTATTATTTCCACGTTTAAGAGATTTAGAACGCATTTGGGGCCGTTTAAGCGATGTTCGGTGAAATTTAGAACCACTAAGTGATATAGGGAATTCTAAATTTCACCGTACGCTAAAACGGCTGTTAATAGTTACCGTAAGGTGATAATATGTAATTAC	0	0	0	0	0	0	19	0	7	5	13	1	32	4	36	0	48	1
miR-9433	CTTGTAGCCGACTATTATTTCCACGTTTAAGAGATTTAGAACGCATTTGGGGCCGTTTAAGCGATGTTCGGTGAAATTTAGAACCACTAAGTGATATAGGGAATTCTAAATTTCACCGTACGCTAAAACGGCTGTTAATAGTTACCGTAAGGTGATAATATGTAATTACGACCAAATAAGGTACAAGCCTATGTAGCTAGT	0	0	0	0	0	0	19	0	7	5	13	1	32	4	36	0	48	1
miR-9433	TGTAGCCGACTATTATTTCCACGTTTAAGAGATTTAGAACGCATTTGGGGCCGTTTAAGCGATGTTCGGTGAAATTTAGAACCACTAAGTGATATAGGGAATTCTAAATTTCACCGTACGCTAAAACGGCTGTTAATAGTTACCGTAAGGTGATAATATGTAATTACGACCAAATAAGGTACAAGCCTATGTAGCTAGTCG	0	0	0	0	0	0	19	0	7	5	13	1	32	4	36	0	48	1
miR-9433	TTGTAGCCGACTATTATTTCCACGTTTAAGAGATTTAGAACGCATTTGGGGCCGTTTAAGCGATGTTCGGTGAAATTTAGAACCACTAAGTGATATAGGGAATTCTAAATTTCACCGTACGCTAAAACGGCTGTTAATAGTTACCGTAAGGTGATAATATGTAATTACGACCAAATAAGGTACAAGCCTATGTAGCTAGTC	0	0	0	0	0	0	19	0	7	5	13	1	32	4	36	0	48	1
miR-2034	ATGGCTTGGTTAAATCAACAAAATAGATCAACACAAGGTTGGCCTGGTGAAAAGAGTGTAGTTTTACTGATGTTTTTAGAATTAGCCCCCTAAATGAAGGGCTAATGCAAAAAATGTCAGTGCAAATGCATGAAACTTACAACTTCAACGTTTTGTTGATTTATTTCTCTAGTGCCAGATTTACCACTGTACAAGACATTG	0	0	0	0	0	0	5	0	2	0	2	1	8	1	46	1	46	0
miR-2034	TAGGAAGAGATCAGATGAGCTGTAGAACAACTAGATGGCTTGGTTAAATCAACAAAATAGATCAACACAAGGTTGGCCTGGTGAAAAGAGTGTAGTTTTACTGATGTTTTTAGAATTAGCCCCCTAAATGAAGGGCTAATGCAAAAAATGTCAGTGCAAATGCATGAAACTTACAACTTCAACGTTTTGTTGATTTATTTC	0	1	0	0	1	3	5	6	2	1	2	3	8	1	46	1	46	0
miR-9434	AGATTCTGACAGGAATTCTGGCTTCTGGGGTGGTATGTATGTTTTTTTCTCAAGGGCTGGGGTTTAAACATTGTCATTTCATTAATCCGATCTGCTATTCATCAGAGAAGTAGATCTCCACATCTGTGAGTAAATGGTGATTACTAGTCCATCTTTGGTCAATCGAACTCTGACAAAATCGTTTGGATTTATTCAAGTGGT	0	1	2	0	14	8	67	11	9	26	12	26	6	10	1	1	3	1
miR-9434	GATTCTGACAGGAATTCTGGCTTCTGGGGTGGTATGTATGTTTTTTTCTCAAGGGCTGGGGTTTAAACATTGTCATTTCATTAATCCGATCTGCTATTCATCAGAGAAGTAGATCTCCACATCTGTGAGTAAATGGTGATTACTAGTCCATCTTTGGTCAATCGAACTCTGACAAAATCGTTTGGATTTATTCAAGTGGTA	0	1	2	0	14	8	67	11	9	26	12	26	6	10	1	1	3	1
miR-9435	CGCTTGTGCCTGGTAGCGACTGCAAGTTTGTAAGTTTAATGACGACACGCAAAGGAGTGGTGCCTACATCCGGGATACTTACATCGTTGCACGCTGAGCTCTTGTCAAGTGTATCTAGTGTGAGTCACGTGCTAGAGACACGTGACTGGTGCTCAGCGGGGCAGGGCGAGTCGGTATGAGGTTAGTAGTTGTGTCGTGAGT	0	0	0	0	0	0	0	0	0	0	0	1	0	0	48	48	1	0
miR-9435	GCGCTTGTGCCTGGTAGCGACTGCAAGTTTGTAAGTTTAATGACGACACGCAAAGGAGTGGTGCCTACATCCGGGATACTTACATCGTTGCACGCTGAGCTCTTGTCAAGTGTATCTAGTGTGAGTCACGTGCTAGAGACACGTGACTGGTGCTCAGCGGGGCAGGGCGAGTCGGTATGAGGTTAGTAGTTGTGTCGTGAG	0	0	0	0	0	0	0	0	0	0	0	1	0	0	48	48	1	0
miR-9435	GTAAGTTTAATGACGACACGCAAAGGAGTGGTGCCTACATCCGGGATACTTACATCGTTGCACGCTGAGCTCTTGTCAAGTGTATCTAGTGTGAGTCACGTGCTAGAGACACGTGACTGGTGCTCAGCGGGGCAGGGCGAGTCGGTATGAGGTTAGTAGTTGTGTCGTGAGTTTAAGGTACATGAGGTAAGTTGGGCGTTG	0	0	0	0	0	0	0	0	0	0	0	1	0	0	48	48	1	0
miR-2032a	ACCATGGAGTACCTCGTGCCCGACAACGATGCAGCAATGGGAGTCCATGCGCCCGATAACCAGGCTGATATGGAAACCACAACACCCGAAGAGGATCGCGAGCTCACCGTTGCTGTCGCTGCAACAGTTAGCTAGCATTTATTGCGAGGTAACTGTTGCAGCATCCATGACTGTGAGGTCAGTATTTCAGCATCTAAAGAT	0	0	2	8	0	0	28	0	6	2	16	2	40	12	548	228	30	8
miR-2032a	CATGCGCCCGATAACCAGGCTGATATGGAAACAACAACACCCGAAGAGGATCGCGAGCTCACCGTTGCTGTCGCTGCGACAGTTAGCTAGCATTTATTGCGAGGTAACTGTTGCAGCATCCATGACTGTGAGGTCAGTATTTCAGCATCTAAAGATAAATGCAAGCTCACTGTTACAGCATCCGAGCCGTCCTCGAGAAAG	0	0	0	1	0	0	4	0	1	0	2	0	12	3	146	58	10	1
miR-2032a	CATGCGCCCGATAACCAGGCTGATATGGAAACCACAACACCCGATGAGGATCGCGAGCTCACCGTTGCTGTCGCTGCAACAGTTAGCTAGCATTTATTGCGAGGTAACTGTTGCAGCATCCATGACTGTGAGGTCAGTATTTCAGCATCTAAAGATAAATGCAAGCTCACTGTTACAGCATCCGAGCCGTCCTCGAGAAAG	0	0	2	8	0	0	28	0	6	2	16	2	40	12	548	228	30	8
miR-2032a	CATGCGCCCGATAACCAGGCTGATATGGAAACCACAACACCCGAAGAGGATCGCGAGCTCACCGTTGCTGTCGCTGCAACAGTTAGCTAGCATTTATTGCGAGGTAACTGTTGCAGCATCCATGACTGTGAGGTCAGTATTTCAGCATCTAAAGATAAATGCAAGCTCACTGTTACAGCATCCGAGCCGTCCTCGAGAAAG	0	0	2	8	0	0	28	0	6	2	16	2	40	12	548	228	30	8
miR-2032a	CCATGCGCCCGATAACCAGGCTGATATGGAAACCACAACACCCGATGAGGATCGCGAGCTCACCGTTGCTGTCGCTGCAACAGTTAGCTAGCATTTATTGCGAGGTAACTGTTGCAGCATCCATGACTGTGAGGTCAGTATTTCAGCATCTAAAGATAAATGCAAGCTCACTGTTACAGCATCCGAGCCGTCCTCGAGAAA	0	0	2	8	0	0	28	0	6	2	16	2	40	12	548	228	30	8
miR-2032a	CCATGCGCCCGATAACCAGGCTGATATGGAAACAACAACACCCGAAGAGGATCGCGAGCTCACCGTTGCTGTCGCTGCGACAGTTAGCTAGCATTTATTGCGAGGTAACTGTTGCAGCATCCATGACTGTGAGGTCAGTATTTCAGCATCTAAAGATAAATGCAAGCTCACTGTTACAGCATCCGAGCCGTCCTCGAGAAA	0	0	0	1	0	0	4	0	1	0	2	0	12	3	146	58	10	1
miR-2032a	CCATGCGCCCGATAACCAGGCTGATATGGAAACCACAACACCCGAAGAGGATCGCGAGCTCACCGTTGCTGTCGCTGCAACAGTTAGCTAGCATTTATTGCGAGGTAACTGTTGCAGCATCCATGACTGTGAGGTCAGTATTTCAGCATCTAAAGATAAATGCAAGCTCACTGTTACAGCATCCGAGCCGTCCTCGAGAAA	0	0	2	8	0	0	28	0	6	2	16	2	40	12	548	228	30	8
miR-2032a	GCCCGACAACGATGCAGCAATGGGAGTCCATGCGCCCGATAACCAGGCTGATATGGAAACCACAACACCCGAAGAGGATCGCGAGCTCACCGTTGCTGTCGCTGCAACAGTTAGCTAGCATTTATTGCGAGGTAACTGTTGCAGCATCCATGACTGTGAGGTCAGTATTTCAGCATCTAAAGATAAATGCAAGCTCACTGT	0	0	2	8	0	0	28	0	6	2	16	2	40	12	548	228	30	8
miR-2032a	GCCTGACAACGATCCAGCAATGGGGGTCCATGCGCCCGATAACCAGGCTGATATGGAAACAACAACACCCGAAGAGGATCGCGAGCTCACCGTTGCTGTCGCTGCGACAGTTAGCTAGCATTTATTGCGAGGTAACTGTTGCAGCATCCATGACTGTGAGGTCAGTATTTCAGCATCTAAAGATAAATGCAAGCTCACTGT	0	0	0	1	0	0	4	0	1	0	2	0	12	3	146	58	10	1
miR-2032a	GCCTGACAACGATGCAGCAATGGGAGTCCATGCGCCCGATAACCAGGCTGATATGGAAACCACAACACCCGATGAGGATCGCGAGCTCACCGTTGCTGTCGCTGCAACAGTTAGCTAGCATTTATTGCGAGGTAACTGTTGCAGCATCCATGACTGTGAGGTCAGTATTTCAGCATCTAAAGATAAATGCAAGCTCACTGT	0	0	2	8	0	0	28	0	6	2	16	2	40	12	548	228	30	8
miR-2032a	GGCCTGACAACGATGCAGCAATGGGAGTCCATGCGCCCGATAACCAGGCTGATATGGAAACCACAACACCCGATGAGGATCGCGAGCTCACCGTTGCTGTCGCTGCAACAGTTAGCTAGCATTTATTGCGAGGTAACTGTTGCAGCATCCATGACTGTGAGGTCAGTATTTCAGCATCTAAAGATAAATGCAAGCTCACTG	0	0	2	8	0	0	28	0	6	2	16	2	40	12	548	228	30	8
miR-2032a	GTGCCCGACAACGATGCAGCAATGGGAGTCCATGCGCCCGATAACCAGGCTGATATGGAAACCACAACACCCGAAGAGGATCGCGAGCTCACCGTTGCTGTCGCTGCAACAGTTAGCTAGCATTTATTGCGAGGTAACTGTTGCAGCATCCATGACTGTGAGGTCAGTATTTCAGCATCTAAAGATAAATGCAAGCTCACT	0	0	2	8	0	0	28	0	6	2	16	2	40	12	548	228	30	8
miR-2032a	TAACCAGGCTGATATGGAAACCACAACACCCGATGAGGATCGCGAGCTCACCGTTGCTGTCGCTGCAACAGTTAGCTAGCATTTATTGCGAGGTAACTGTTGCAGCATCCATGACTGTGAGGTCAGTATTTCAGCATCTAAAGATAAATGCAAGCTCACTGTTACAGCATCCGAGCCGTCCTCGAGAAAGAGGATACAAAG	0	0	2	8	0	0	28	0	6	2	16	2	40	12	548	228	30	8
miR-2032a	TAACCAGGCTGATATGGAAACCACAACACCCGAAGAGGATCGCGAGCTCACCGTTGCTGTCGCTGCAACAGTTAGCTAGCATTTATTGCGAGGTAACTGTTGCAGCATCCATGACTGTGAGGTCAGTATTTCAGCATCTAAAGATAAATGCAAGCTCACTGTTACAGCATCCGAGCCGTCCTCGAGAAAGAGGATACAAAG	0	0	2	8	0	0	28	0	6	2	16	2	40	12	548	228	30	8
miR-2032a	TAACCAGGCTGATATGGAAACAACAACACCCGAAGAGGATCGCGAGCTCACCGTTGCTGTCGCTGCGACAGTTAGCTAGCATTTATTGCGAGGTAACTGTTGCAGCATCCATGACTGTGAGGTCAGTATTTCAGCATCTAAAGATAAATGCAAGCTCACTGTTACAGCATCCGAGCCGTCCTCGAGAAAGAGGATACAAAG	0	0	0	1	0	0	4	0	1	0	2	0	12	3	146	58	10	1
miR-2032a	TCTGCCGTGCTCCCTTGGCCTGACAACGATCCAGCAATGGGGGTCCATGCGCCCGATAACCAGGCTGATATGGAAACAACAACACCCGAAGAGGATCGCGAGCTCACCGTTGCTGTCGCTGCGACAGTTAGCTAGCATTTATTGCGAGGTAACTGTTGCAGCATCCATGACTGTGAGGTCAGTATTTCAGCATCTAAAGAT	0	0	0	1	0	0	4	0	1	0	2	0	12	3	146	58	10	1
miR-2032a	TCTGCCGTGCTCCCTTGGCCTGACAACGATGCAGCAATGGGAGTCCATGCGCCCGATAACCAGGCTGATATGGAAACCACAACACCCGATGAGGATCGCGAGCTCACCGTTGCTGTCGCTGCAACAGTTAGCTAGCATTTATTGCGAGGTAACTGTTGCAGCATCCATGACTGTGAGGTCAGTATTTCAGCATCTAAAGAT	0	0	2	8	0	0	28	0	6	2	16	2	40	12	548	228	30	8
miR-2032a	TGCCCGACAACGATGCAGCAATGGGAGTCCATGCGCCCGATAACCAGGCTGATATGGAAACCACAACACCCGAAGAGGATCGCGAGCTCACCGTTGCTGTCGCTGCAACAGTTAGCTAGCATTTATTGCGAGGTAACTGTTGCAGCATCCATGACTGTGAGGTCAGTATTTCAGCATCTAAAGATAAATGCAAGCTCACTG	0	0	2	8	0	0	28	0	6	2	16	2	40	12	548	228	30	8
miR-2032a	TGGCCTGACAACGATCCAGCAATGGGGGTCCATGCGCCCGATAACCAGGCTGATATGGAAACAACAACACCCGAAGAGGATCGCGAGCTCACCGTTGCTGTCGCTGCGACAGTTAGCTAGCATTTATTGCGAGGTAACTGTTGCAGCATCCATGACTGTGAGGTCAGTATTTCAGCATCTAAAGATAAATGCAAGCTCACT	0	0	0	1	0	0	4	0	1	0	2	0	12	3	146	58	10	1
miR-2032a	TGGCCTGACAACGATGCAGCAATGGGAGTCCATGCGCCCGATAACCAGGCTGATATGGAAACCACAACACCCGATGAGGATCGCGAGCTCACCGTTGCTGTCGCTGCAACAGTTAGCTAGCATTTATTGCGAGGTAACTGTTGCAGCATCCATGACTGTGAGGTCAGTATTTCAGCATCTAAAGATAAATGCAAGCTCACT	0	0	2	8	0	0	28	0	6	2	16	2	40	12	548	228	30	8
miR-9436	AATCTACGGCTGTGTCAAGGTTTAAAGAGCCCTACTCAGCCAAACATTTGTTATTGTTAAGGCCTGGCTAAACATTCAAACATGTTTGTCAAACATTTCGTTTGACGCAAATGTTTGTATGTTTAGCCACCCACAAAACATGGCACTCAATTGGCTTCCACAACACGTACAGATGTTTGAACGAGATCAAAACATTTAGGT	0	0	0	0	0	0	3	1	1	1	1	0	6	2	31	9	24	7
miR-9436	ATCTACGGCTGTGTCAAGGTTTAAAGAGCCCTACTCAGCCAAACATTTGTTATTGTTAAGGCCTGGCTAAACATTCAAACATGTTTGTCAAACATTTCGTTTGACGCAAATGTTTGTATGTTTAGCCACCCACAAAACATGGCACTCAATTGGCTTCCACAACACGTACAGATGTTTGAACGAGATCAAAACATTTAGGTT	0	0	0	0	0	0	3	1	1	1	1	0	6	2	31	9	24	7
miR-9436	GTCGTTGCCACATGAAGCAGATGAAAACAGATTTGAAATACAGTAGAACCCCGCTAAAGGCCTGGCTTAACACGAAAACATGTTTGTCAAACATTGCGTTTGACGCAAATGTTTGTATGTTTAGCCACCCACAATTGGCTTCCACAACACGTCAAACATTGTGCGTTGAACATTTGCGTTGAACGCAAATGCTTTATCGTT	0	0	0	0	0	0	3	1	1	1	1	0	5	1	31	9	24	7
miR-9436	TCTACGGCTGTGTCAAGGTTTAAAGAGCCCTACTCAGCCAAACATTTGTTATTGTTAAGGCCTGGCTAAACATTCAAACATGTTTGTCAAACATTTCGTTTGACGCAAATGTTTGTATGTTTAGCCACCCACAAAACATGGCACTCAATTGGCTTCCACAACACGTACAGATGTTTGAACGAGATCAAAACATTTAGGTTG	0	0	0	0	0	0	3	1	1	1	1	0	6	2	31	9	24	7
miR-9436	TGTCGTTGCCACATGAAGCAGATGAAAACAGATTTGAAATACAGTAGAACCCCGCTAAAGGCCTGGCTTAACACGAAAACATGTTTGTCAAACATTGCGTTTGACGCAAATGTTTGTATGTTTAGCCACCCACAATTGGCTTCCACAACACGTCAAACATTGTGCGTTGAACATTTGCGTTGAACGCAAATGCTTTATCGT	0	0	0	0	0	0	3	1	1	1	1	0	5	1	31	9	24	7
miR-9436	TTGTCGTTGCCACATGAAGCAGATGAAAACAGATTTGAAATACAGTAGAACCCCGCTAAAGGCCTGGCTTAACACGAAAACATGTTTGTCAAACATTGCGTTTGACGCAAATGTTTGTATGTTTAGCCACCCACAATTGGCTTCCACAACACGTCAAACATTGTGCGTTGAACATTTGCGTTGAACGCAAATGCTTTATCG	0	0	0	0	0	0	3	1	1	1	1	0	5	1	31	9	24	7
miR-9437	ATGGCTTCGCGAAGCGCAACGCAAACGACGGCTGAAACCTCGTTCACCACAGGAGATGCAGCGACAAGACTCGGTCTCATGTCCCTCAGGAAGGAATACCCAGACCTTAACGAGAATCTGATACGGTTCCAGTCAGACTGGAGTGGAAAGACGCTAATACAGGTTCACGACCTCAAAAATAGAGGTTGGACTAAACCACAA	27	13	17	17	42	31	26	29	23	14	4	8	3	6	20	18	18	15
miR-9437	CAGAGGGTGCAGCGACAAGACTCGGTCTCCAGTTCCTCAGGGAGAAATACCCAGACCTTAACGAGAATCTGATACGGTTCCAGTCAGACCAGAGGGGGAAGACGCTAATACAGGTTCGCAACCTCGACAAAGGAGATTGGTCTAAACCAAGACAGCTGTTCAACGACGACGGGGGCGTCCGACAGGACGTTGCAAAGCTGA	28	13	18	18	43	32	26	30	23	15	4	8	3	6	20	19	18	15
miR-9437	CAGAGGGTGCAGCGACAAGACTCGGTCTCCAGTCCCTCAGGGAGAAATACCCAGACCTTAACGAGAATCTGATACGGTTCCAGTCAGACCAGAGGGGAAAGACGCTAATACAGGTTCGCAACCTTGGCAAAGAAGGTTGGACTAAACCAAAACAGCTGTTCAAGGAGGACGGGGGCGTTCGACAGGATGTTGCAAAGCTGA	31	24	23	21	49	38	28	35	31	20	6	12	3	7	26	25	25	17
miR-9437	CATAGCATGGCTTCGCGAAGCGCAACGCAAACGACGGCTGAAACCTCGTTCACCACAGGAGATGCAGCGACAAGACTCGGTCTCATGTCCCTCAGGAAGGAATACCCAGACCTTAACGAGAATCTGATACGGTTCCAGTCAGACTGGAGTGGAAAGACGCTAATACAGGTTCACGACCTCAAAAATAGAGGTTGGACTAAA	27	13	17	17	42	31	26	29	23	14	4	8	3	6	20	18	18	15
miR-9437	CGCGAAGCGCAACGCAAACGACGGCTGAAACCTCGTTCACCACAGGAGATGCAGCGACAAGACTCGGTCTCATGTCCCTCAGGAAGGAATACCCAGACCTTAACGAGAATCTGATACGGTTCCAGTCAGACTGGAGTGGAAAGACGCTAATACAGGTTCACGACCTCAAAAATAGAGGTTGGACTAAACCACAACCGCTGT	27	13	17	17	42	31	26	29	23	14	4	8	3	6	20	18	18	15
miR-9437	GCTTCGCGAAGCGCAACGCAAACGACGGCTGAAACCTCGTTCACCACAGGAGATGCAGCGACAAGACTCGGTCTCATGTCCCTCAGGAAGGAATACCCAGACCTTAACGAGAATCTGATACGGTTCCAGTCAGACTGGAGTGGAAAGACGCTAATACAGGTTCACGACCTCAAAAATAGAGGTTGGACTAAACCACAACCG	27	13	17	17	42	31	26	29	23	14	4	8	3	6	20	18	18	15
miR-9437	TCGCGAAGCGCAACGCAAACGACGGCTGAAACCTCGTTCACCACAGGAGATGCAGCGACAAGACTCGGTCTCATGTCCCTCAGGAAGGAATACCCAGACCTTAACGAGAATCTGATACGGTTCCAGTCAGACTGGAGTGGAAAGACGCTAATACAGGTTCACGACCTCAAAAATAGAGGTTGGACTAAACCACAACCGCTG	27	13	17	17	42	31	26	29	23	14	4	8	3	6	20	18	18	15
miR-9438	CACCCGCCTCGAGGATACTACACAAGTGTCTCGATTATGGGCCTTAGGGCCTATGTAGACGACGGGAAAGTAATTGAGACATTAAGAAAGCACGGAGAAATTAAAAGCGATGTGATAAGACTAAAATACAAGGTCGGACACGAGCTAGAGGGCCTGGAGAACGGGAATAGGCTGGTAAAGATGGTTTTGAATAACGCATCC	0	2	1	1	29	37	67	61	26	43	30	25	33	38	0	0	0	1
miR-9438	CTCGAGGATACTACACAAGTGTCTCGATTATGGGCCTTAGGGCCTATGTAGACGACGGGAAAGTAATTGAGACATTAAGAAAGCACGGAGAAATTAAAAGCGATGTGATAAGACTAAAATACAAGGTCGGACACGAGCTAGAGGGCCTGGAGAACGGGAATAGGCTGGTAAAGATGGTTTTGAATAACGCATCCATTCCCT	0	2	1	1	29	37	67	62	27	43	30	25	33	38	0	0	0	1
miR-9439	ACATTTAAGCACAGTGCTGGTCTGCCATTGGAGATACTGGCCAAGGTAAAGCCAGTATATGTTAAATGTATAAGTGAAGCCAGTCTGCTGGAGAAATGCCTACATGGCAAAACACAGAACCAGAATGAGAGTTTGAATGCGATGATTTGGCAGCGAGTGCCCAAGGAGGTGCATGTCGGCAGGGATATTCTGGAATTGAGC	25	29	19	22	57	66	23	41	32	17	9	16	23	10	17	18	21	23
miR-9439	ATACATTTAAGCACAGTGCTGGTCTGCCATTGGAGATACTGGCCAAGGTAAAGCCAGTATATGTTAAATGTATAAGTGAAGCCAGTCTGCTGGAGAAATGCCTACATGGCAAAACACAGAACCAGAATGAGAGTTTGAATGCGATGATTTGGCAGCGAGTGCCCAAGGAGGTGCATGTCGGCAGGGATATTCTGGAATTGA	25	29	19	22	57	66	23	41	32	17	9	16	23	10	17	18	22	23
miR-9439	CATTTAAGCACAGTGCTGGTCTGCCATTGGAGATACTGGCCAAGGTAAAGCCAGTATATGTTAAATGTATAAGTGAAGCCAGTCTGCTGGAGAAATGCCTACATGGCAAAACACAGAACCAGAATGAGAGTTTGAATGCGATGATTTGGCAGCGAGTGCCCAAGGAGGTGCATGTCGGCAGGGATATTCTGGAATTGAGCT	25	29	19	22	57	66	23	41	32	17	9	16	23	10	17	18	21	23
miR-9439	TACATTTAAGCACAGTGCTGGTCTGCCATTGGAGATACTGGCCAAGGTAAAGCCAGTATATGTTAAATGTATAAGTGAAGCCAGTCTGCTGGAGAAATGCCTACATGGCAAAACACAGAACCAGAATGAGAGTTTGAATGCGATGATTTGGCAGCGAGTGCCCAAGGAGGTGCATGTCGGCAGGGATATTCTGGAATTGAG	25	29	19	22	57	66	23	41	32	17	9	16	23	10	17	18	21	23
miR-9440	ATACCAAAGCCTGAGGGACGACAACCTCGCCCGGTCTGCAGCCGCCGCCTACCAAAACGGCACAACGTTCTTCTACGAGCAAGTGAACCTCCACAAGACCTTCGTGATTAGCAAAGGGACGGACAGCATAATCAACGAGAGTGTCAACCTGCCGCGAAGGTCTATGAGTGGTCTGTTGCTCATCTTTGTGTAGCCATACAC	17	24	36	18	29	31	13	22	9	11	4	8	7	8	21	23	29	19
miR-9440	ATACGAAAGCCTGATGGAAGAAAACCTCGCCCGGTCAGCAGCCGCCGCCTACCAAAACGGCACAACGTTCTTCTACGAGCAAGTGAACCTCCACAAGACCTTCGTGATTAGCAAAGGGACGGAAAGCATAATCAACGAGAGTGTCAACCTGCCGCGAAGGTCTATGAGTGGTCTGTTGCTTCTCTTTGTGGAGCCATACAC	17	24	35	18	30	30	13	18	9	10	4	8	6	8	21	23	28	20
miR-9440	ATACGAAAGCCTGAGGGACGACAACCTCGCCCGGTGTGCAGCCGCCGCCTACCAAAACGGCACAACGTTCTTCTACGAGCAAGTGAACCTCCACAAGACCTTCGTGATTAGCAAAGGGACGGACAGCATAATCAACGAGAGTGTCAACCTGCCGCGAAGGTCTATGAGTGGTCTGTTGCTCCTCTTTGTTGAGCCATACAC	17	24	35	19	30	35	15	27	10	14	6	9	7	8	23	23	32	19
miR-9440	GGAATACCAAAGCCTGAGGGACGACAACCTCGCCCGGTCTGCAGCCGCCGCCTACCAAAACGGCACAACGTTCTTCTACGAGCAAGTGAACCTCCACAAGACCTTCGTGATTAGCAAAGGGACGGACAGCATAATCAACGAGAGTGTCAACCTGCCGCGAAGGTCTATGAGTGGTCTGTTGCTCATCTTTGTGTAGCCATA	17	24	36	18	29	31	13	22	9	11	4	8	7	8	21	23	29	19
miR-9440	GGAATACGAAAGCCTGATGGAAGAAAACCTCGCCCGGTCAGCAGCCGCCGCCTACCAAAACGGCACAACGTTCTTCTACGAGCAAGTGAACCTCCACAAGACCTTCGTGATTAGCAAAGGGACGGAAAGCATAATCAACGAGAGTGTCAACCTGCCGCGAAGGTCTATGAGTGGTCTGTTGCTTCTCTTTGTGGAGCCATA	17	24	35	18	30	30	13	18	9	10	4	8	6	8	21	23	28	20
miR-9440	GGAATACGAAAGCCTGAGGGACGACAACCTCGCCCGGTGTGCAGCCGCCGCCTACCAAAACGGCACAACGTTCTTCTACGAGCAAGTGAACCTCCACAAGACCTTCGTGATTAGCAAAGGGACGGACAGCATAATCAACGAGAGTGTCAACCTGCCGCGAAGGTCTATGAGTGGTCTGTTGCTCCTCTTTGTTGAGCCATA	19	24	35	20	30	36	15	27	10	14	6	9	7	8	23	23	32	19
miR-9440	GGAATACGAAAGCCTGAGGGACGACAACCTCGCTCGGTCTGCAGCCGCCGCCTACCAAAACGGCACAACGTTCTTCTACGTGCAAGTGAACCTTCACAAGACCTTCGTGATTAGCAAAGGGACGGACAGCATAATCAACGAGAGTGTCAACCTGCCGCGAAGGTCTATGAGTGGTCTGTTGCTCCTCTTTATGGAGCCATA	18	16	26	14	18	29	9	20	9	12	5	7	6	4	20	18	28	13
miR-9441	AAGTTGGCGACCACCACAACAGGACCCTCCATCACCACCAGTCGTCGCAAGCGAAGGCACTCCTGGCTCGGCGTCTCCCTTGGGCCTCGATCACTGGACGAGGCACTAGAGGGCAAGATTACTCGGGGTGAGTACATCGATTTTGCTCTCCTTCTCCCCGATAATCTTGCGCACGCCGGGCCCGAATTCCAACTTGGTTTC	0	0	1	1	2	5	15	7	3	3	13	18	29	49	0	1	3	3
miR-9441	ACCACAACAGGACCCTCCATCACCACCAGTCGTCGCAAGCGAAGGCACTCCTGGCTCGGCGTCTCCCTTGGGCCTCGATCACTGGACGAGGCACTAGAGGGCAAGATTACTCGGGGTGAGTACATCGATTTTGCTCTCCTTCTCCCCGATAATCTTGCGCACGCCGGGCCCGAATTCCAACTTGGTTTCGCCGAAAACTCG	0	0	1	1	2	6	15	8	4	4	14	20	35	50	1	1	3	3
miR-9441	CAAGCGAAGGCACTCCTGGCTCGGCGTCTCCCTTGGGCCTCGATCACTGGACGAGGCACTAGAGGGCAAGATTACTCGGGGTGAGTACATCGATTTTGCTCTCCTTCTCCCCGATAATCTTGCGCACGCCGGGCCCGAATTCCAACTTGGTTTCGCCGAAAACTCGGAGAGCGTCAGGCTCTTGCGCAATAAACGACAGAG	0	0	1	1	2	5	14	6	4	4	9	17	32	41	1	0	1	1
miR-9441	CACCACAACAGGACCCTCCATCACCACCAGTCGTCGCAAGCGAAGGCACTCCTGGCTCGGCGTCTCCCTTGGGCCTCGATCACTGGACGAGGCACTAGAGGGCAAGATTACTCGGGGTGAGTACATCGATTTTGCTCTCCTTCTCCCCGATAATCTTGCGCACGCCGGGCCCGAATTCCAACTTGGTTTCGCCGAAAACTC	0	0	1	1	2	6	15	8	4	4	14	20	35	50	1	1	3	3
miR-9441	CACTAGAGGGCAAGATTACTCGGGGTGAGTACATCGATCTTGCCCTCCTTCACCCCGATAATCTTGCGCACGCCGGGCCTTAATTCCAGCTCGGTTTCGCCGAGAACTCGGAGAGCGTCAGGCTCTTGCGTAATAACGTAATAACGCCAGAGCATCGACTCCTTCTATAAATGGGTTATCGCGTACACACGGTATACGCTT	0	0	1	0	2	4	13	5	1	3	5	16	26	44	1	5	2	1
miR-9441	GACCACCACAACAGGACCCTCCATCACCACCAGTCGTCGCAAGCGAAGGCACTCCTGGCTCGGCGTCTCCCTTGGGCCTCGATCACTGGACGAGGCACTAGAGGGCAAGATTACTCGGGGTGAGTACATCGATTTTGCTCTCCTTCTCCCCGATAATCTTGCGCACGCCGGGCCCGAATTCCAACTTGGTTTCGCCGAAAA	0	0	1	1	2	6	15	8	4	4	14	20	35	50	1	1	3	3
miR-9441	GATGAGGCACTAGAGGGCAAGATTACTCGGGGTGAGTACATCGATCTTGCCCTCCTTCACCCCGATAATCTTGCGCACGCCGGGCCTTAATTCCAGCTCGGTTTCGCCGAGAACTCGGAGAGCGTCAGGCTCTTGCGTAATAACGTAATAACGCCAGAGCATCGACTCCTTCTATAAATGGGTTATCGCGTACACACGGTA	0	0	1	0	2	4	13	5	1	3	6	16	27	44	1	5	3	1
miR-9441	GCAAGTTGGCGACCACCACAACAGGACCCTCCATCACCACCAGTCGTCGCAAGCGAAGGCACTCCTGGCTCGGCGTCTCCCTTGGGCCTCGATCACTGGACGAGGCACTAGAGGGCAAGATTACTCGGGGTGAGTACATCGATTTTGCTCTCCTTCTCCCCGATAATCTTGCGCACGCCGGGCCCGAATTCCAACTTGGTT	0	0	1	0	2	5	15	7	3	3	14	17	30	49	0	1	3	3
miR-9441	GCACTCCTGGCTCGGCGTCTCCCTTGGGCCTCGATCACTGGACGAGGCACTAGAGGGCAAGATTACTCGGGGTGAGTACATCGATTTTGCTCTCCTTCTCCCCGATAATCTTGCGCACGCCGGGCCCGAATTCCAACTTGGTTTCGCCGAAAACTCGGAGAGCGTCAGGCTCTTGCGCAATAAACGACAGAGCATAGACTC	0	0	1	1	3	5	19	11	7	11	14	25	39	46	1	0	2	2
miR-9442	CGCCACTGAAGATCTCCGTTTTGTTGGACTTTGTTGCCCTGTCTACCACCCGATGAGACGACGTCATTCGTCTGCTGATAGAATAGGCGGGGTGCCCCGGAATATCAGGAGGACGCATTCGTTTTACGCATGCGTCCTCGTGATACTTCCGGTCATTCCCAAATGCCACCTCGCATTTACCTGATCACAAACATGCTGTGC	0	0	2	0	0	0	0	0	0	0	0	0	0	0	21	22	0	0
miR-9442	GCCACTGAAGATCTCCGTTTTGTTGGACTTTGTTGCCCTGTCTACCACCCGATGAGACGACGTCATTCGTCTGCTGATAGAATAGGCGGGGTGCCCCGGAATATCAGGAGGACGCATTCGTTTTACGCATGCGTCCTCGTGATACTTCCGGTCATTCCCAAATGCCACCTCGCATTTACCTGATCACAAACATGCTGTGCA	0	0	2	0	0	0	0	0	0	0	0	0	0	0	21	22	0	0
miR-9443	CATTATTATTTGTTTTTCACTCCACATTAATTGCATTTTATTTCTTTTTATTTGGATTTATTGCAATGAGTTCTGCGGCTCCTCAGCGTTCCAGGCGTTTAGCAGCCAGACAGGTTGGGGGACCCAATCGGGGTAGAGCTAACCGAGACGCTGCCGCGGATGCTCCAGTCAGGGAGATGAACATCACCCCTCGGGAGGACA	1	1	5	4	12	17	26	38	13	23	9	11	16	8	1	3	1	3
miR-9443	GAGTTGTTTCATTATTATTTGTTTTTCACTCCACATTAATTGCATTTTATTTCTTTTTATTTGGATTTATTGCAATGAGTTCTGCGGCTCCTCAGCGTTCCAGGCGTTTAGCAGCCAGACAGGTTGGGGGACCCAATCGGGGTAGAGCTAACCGAGACGCTGCCGCGGATGCTCCAGTCAGGGAGATGAACATCACCCCTC	1	1	5	4	13	17	27	38	13	23	9	11	16	8	1	3	1	3
miR-9443	TCATTATTATTTGTTTTTCACTCCACATTAATTGCATTTTATTTCTTTTTATTTGGATTTATTGCAATGAGTTCTGCGGCTCCTCAGCGTTCCAGGCGTTTAGCAGCCAGACAGGTTGGGGGACCCAATCGGGGTAGAGCTAACCGAGACGCTGCCGCGGATGCTCCAGTCAGGGAGATGAACATCACCCCTCGGGAGGAC	1	1	5	4	12	17	26	38	13	23	9	11	16	8	1	3	1	3
miR-9443	TGCATTTTATTTCTTTTTATTTGGATTTATTGCAATGAGTTCTGCGGCTCCTCAGCGTTCCAGGCGTTTAGCAGCCAGACAGGTTGGGGGACCCAATCGGGGTAGAGCTAACCGAGACGCTGCCGCGGATGCTCCAGTCAGGGAGATGAACATCACCCCTCGGGAGGACAGAACACCCCAGGTCAGGGGGCGGAAACGGGC	1	1	5	4	16	18	28	38	13	24	11	14	18	10	1	3	1	3
miR-9443	TTATTATTTGTTTTTCACTCCACATTAATTGCATTTTATTTCTTTTTATTTGGATTTATTGCAATGAGTTCTGCGGCTCCTCAGCGTTCCAGGCGTTTAGCAGCCAGACAGGTTGGGGGACCCAATCGGGGTAGAGCTAACCGAGACGCTGCCGCGGATGCTCCAGTCAGGGAGATGAACATCACCCCTCGGGAGGACAGA	1	1	5	4	12	17	26	38	13	23	9	11	16	8	1	3	1	3
miR-9443	TTCATTATTATTTGTTTTTCACTCCACATTAATTGCATTTTATTTCTTTTTATTTGGATTTATTGCAATGAGTTCTGCGGCTCCTCAGCGTTCCAGGCGTTTAGCAGCCAGACAGGTTGGGGGACCCAATCGGGGTAGAGCTAACCGAGACGCTGCCGCGGATGCTCCAGTCAGGGAGATGAACATCACCCCTCGGGAGGA	1	1	5	4	12	17	26	38	13	23	9	11	16	8	1	3	1	3
miR-9444	GTGTTTCATTTTGACGTTCGCATAGTTGTATTGTCGTTGCGTTATCAACGATAGTGTTTCCTGTTCCAGGACCTGTCACTCACTTGCTCAGACAATCTTCAACAAAAGTAAGTGGGACACTTCCTATACGAACAACCGCCAACCCTCTCCCCCCGATTAATATTGGTTAGAGGCGGTTTTTCAGCTCAAAACACAAGCAGT	11	9	15	13	13	12	24	32	18	9	9	20	30	32	17	18	11	8
miR-9445	AAAGCTAAGAGAAGAGAGTGTGGTGATCGTAATAAATGAAATTCTGTGAAACACCGTTTACATATGAGCGCTTATAGAGGTACCCTCTTACGCAGAGCTTTCTGTGTCGCTCGTTTACTTTGCTTTGATGTGGAGCAGAGTGAAAGACCGACACAGAAAGCTCTGCGCATGAGGGTATTATAGAGGCTAACTTAAAAAAAA	0	0	0	0	1	0	20	2	1	4	5	2	24	10	6	1	18	5
miR-9445	AAATCGAGGTATCGTTGCAAAGAGGTCTTCGATTATACGTTATGGGGGAAATCAAATTAAAATATCGTTCTAGCGAGGTCTACCCTTCTGCGCAGAGCTTTCTGTGTCGCTCGTTTACTTTGCTCCACATTATCAACAAAGAACACGAGCGACACAAAAAGCACTGCGCAGGAGGGTAGGCGAGGTCGGGTTAATGGTCAT	0	0	0	0	1	0	20	1	1	4	5	2	24	10	5	0	19	5
miR-9445	AAGCTAAGAGAAGAGAGTGTGGTGATCGTAATAAATGAAATTCTGTGAAACACCGTTTACATATGAGCGCTTATAGAGGTACCCTCTTACGCAGAGCTTTCTGTGTCGCTCGTTTACTTTGCTTTGATGTGGAGCAGAGTGAAAGACCGACACAGAAAGCTCTGCGCATGAGGGTATTATAGAGGCTAACTTAAAAAAAAA	0	0	0	0	1	0	20	2	1	4	5	2	24	10	6	1	18	5
miR-9445	AATCGAGGTATCGTTGCAAAGAGGTCTTCGATTATACGTTATGGGGGAAATCAAATTAAAATATCGTTCTAGCGAGGTCTACCCTTCTGCGCAGAGCTTTCTGTGTCGCTCGTTTACTTTGCTCCACATTATCAACAAAGAACACGAGCGACACAAAAAGCACTGCGCAGGAGGGTAGGCGAGGTCGGGTTAATGGTCATC	0	0	0	0	1	0	20	1	1	4	5	2	24	10	5	0	19	5
miR-9445	AATTAGGGACATTATTATACAAAAACGGCGAGGATGGTGTAACCGAGAGTAATGCTTTGGCGCTTGGTGCCAAATCCCTTCCCTCCTGCGCAAAGCTTTCTGTGTCGCTCGTTTACTTTGCTTGGAGCAATGTCAATGAGTGACACAGAAAGCTCTAAGCAGGAGGGTGCCAAATCCCTAACTAGATTGAAAATGAAAATA	0	0	0	0	1	0	20	1	1	4	5	2	24	10	5	0	18	5
miR-9445	AGCTAAGAGAAGAGAGTGTGGTGATCGTAATAAATGAAATTCTGTGAAACACCGTTTACATATGAGCGCTTATAGAGGTACCCTCTTACGCAGAGCTTTCTGTGTCGCTCGTTTACTTTGCTTTGATGTGGAGCAGAGTGAAAGACCGACACAGAAAGCTCTGCGCATGAGGGTATTATAGAGGCTAACTTAAAAAAAAAA	0	0	0	0	1	0	20	2	1	4	5	2	24	10	6	1	18	5
miR-9445	ATACAAGATGTTATTTGTTCTTACACACATCCCTTGTTATATATAGTAATCGTCTATCATTTGTTTATTATATACATTTTACCCTCCTGTGCAGAGCTTTCTGTGTCGCTCGTTTACTTTGCTCCATATCAACAAAGTAAAAGAACCACACAGAAAGCTCTGCTCAGGGTTTACAGAAATATTGATATAAAATACTTCTAA	0	0	0	0	1	0	20	1	1	4	5	2	24	10	5	0	19	5
miR-9445	ATCGAGGTATCGTTGCAAAGAGGTCTTCGATTATACGTTATGGGGGAAATCAAATTAAAATATCGTTCTAGCGAGGTCTACCCTTCTGCGCAGAGCTTTCTGTGTCGCTCGTTTACTTTGCTCCACATTATCAACAAAGAACACGAGCGACACAAAAAGCACTGCGCAGGAGGGTAGGCGAGGTCGGGTTAATGGTCATCT	0	0	0	0	1	0	20	1	1	4	5	2	24	10	5	0	19	5
miR-9445	CTAAGAGAAGAGAGTGTGGTGATCGTAATAAATGAAATTCTGTGAAACACCGTTTACATATGAGCGCTTATAGAGGTACCCTCTTACGCAGAGCTTTCTGTGTCGCTCGTTTACTTTGCTTTGATGTGGAGCAGAGTGAAAGACCGACACAGAAAGCTCTGCGCATGAGGGTATTATAGAGGCTAACTTAAAAAAAAAAAC	0	0	0	0	1	0	20	2	1	4	5	2	24	10	6	1	18	5
miR-9445	CTCGCGTTTCATTCTGATTGGTGGCTGAGTATTGCATGACTACCTCAAGCAGACAAGTCCAGCCAAAGGAATTACCAATTACCTTCCTGCGTAGAGCTTTCTGTGTCGCTCGTTTACTTTGCTCCACATCATTGATGTGGAGGAGGGTAAAGGAATACCAAACCAAAGTGAAATCGTCCTTGCTGAATCATGACTACTTGA	0	0	0	0	1	0	20	1	1	4	5	2	24	10	5	0	19	5
miR-9445	CTTATAATGGGTGGATAAAATTATAATGGTTGGATAAAATTTGATGCATGTTAACTTGAAAGACAGACACGCAGATGGATACCCTCTGCGCAGAGCTTTCTGTGTCGCTCGTTTACTTTGCTCTACATCAAAGCAATGTAAACGATGGACACGTGAAGCTCTGCGCAGGATGAAACAGAAAGACGGACATAGAGACAGACA	0	0	0	0	1	0	21	1	2	4	5	2	26	12	5	0	20	5
miR-9445	GCTCGCGTTTCATTCTGATTGGTGGCTGAGTATTGCATGACTACCTCAAGCAGACAAGTCCAGCCAAAGGAATTACCAATTACCTTCCTGCGTAGAGCTTTCTGTGTCGCTCGTTTACTTTGCTCCACATCATTGATGTGGAGGAGGGTAAAGGAATACCAAACCAAAGTGAAATCGTCCTTGCTGAATCATGACTACTTG	0	0	0	0	1	0	20	1	1	4	5	2	24	10	5	0	19	5
miR-9445	GCTTATAATGGGTGGATAAAATTATAATGGTTGGATAAAATTTGATGCATGTTAACTTGAAAGACAGACACGCAGATGGATACCCTCTGCGCAGAGCTTTCTGTGTCGCTCGTTTACTTTGCTCTACATCAAAGCAATGTAAACGATGGACACGTGAAGCTCTGCGCAGGATGAAACAGAAAGACGGACATAGAGACAGAC	0	0	0	0	1	0	21	1	2	4	5	2	26	12	5	0	20	5
miR-9445	GTAATTAGGGACATTATTATACAAAAACGGCGAGGATGGTGTAACCGAGAGTAATGCTTTGGCGCTTGGTGCCAAATCCCTTCCCTCCTGCGCAAAGCTTTCTGTGTCGCTCGTTTACTTTGCTTGGAGCAATGTCAATGAGTGACACAGAAAGCTCTAAGCAGGAGGGTGCCAAATCCCTAACTAGATTGAAAATGAAAA	0	0	0	0	1	0	20	1	1	4	5	2	24	10	5	0	18	5
miR-9445	GTAGCCCAAACGTACCGGTTTAGAGGAAACCGACTGAAATTGCCAAGTAACCCCATGCGTTTTCCTTCAAACTACAACTACCCTTGTGCGCAGAGCTTTCTGTGTCGCTCGTTTACTTTGCTCCACATCAACAAGTAAAGTAAACGAGTGACACAGAAAGCTCTGCGCACGAGGGTAAACTACAACGTAAAATCTCAAGTT	0	0	0	0	1	0	20	1	1	4	5	2	24	10	5	0	19	5
miR-9445	GTTCGACTCTGTCTTTGACAGCAACCTGCAGGTGCTCGCCAGAATAAACAGCTACAAAGGAAAATTAGTGGTTACTTTAGTACCCTCTTGCGCAGAGCTTTCTGTGTCGCTCGTTTACTTTACTTGTTGATGTGGAGCAAAGTAAATGAGCGACATATTTTATGCACGTCTCCCGAGAGATTTCCCTCATTTTGTTTCCTT	0	0	0	0	0	0	6	0	0	0	0	0	4	0	2	0	11	0
miR-9445	TAAAATTTGATGCATGTTAACTTGAAAGACAGACACGCAGATGGATACCCTCTGCGCAGAGCTTTCTGTGTCGCTCGTTTACTTTGCTCTACATCAAAGCAATGTAAACGATGGACACGTGAAGCTCTGCGCAGGATGAAACAGAAAGACGGACATAGAGACAGACAAACAGCCAAGAAGACGGTCGGACAAGCGAGCGGA	0	0	0	0	1	0	21	1	2	4	5	2	26	12	5	0	20	5
miR-9445	TAATTAGGGACATTATTATACAAAAACGGCGAGGATGGTGTAACCGAGAGTAATGCTTTGGCGCTTGGTGCCAAATCCCTTCCCTCCTGCGCAAAGCTTTCTGTGTCGCTCGTTTACTTTGCTTGGAGCAATGTCAATGAGTGACACAGAAAGCTCTAAGCAGGAGGGTGCCAAATCCCTAACTAGATTGAAAATGAAAAT	0	0	0	0	1	0	20	1	1	4	5	2	24	10	5	0	18	5
miR-9445	TACAAGATGTTATTTGTTCTTACACACATCCCTTGTTATATATAGTAATCGTCTATCATTTGTTTATTATATACATTTTACCCTCCTGTGCAGAGCTTTCTGTGTCGCTCGTTTACTTTGCTCCATATCAACAAAGTAAAAGAACCACACAGAAAGCTCTGCTCAGGGTTTACAGAAATATTGATATAAAATACTTCTAAG	0	0	0	0	1	0	20	1	1	4	5	2	24	10	5	0	19	5
miR-9445	TATACAAGATGTTATTTGTTCTTACACACATCCCTTGTTATATATAGTAATCGTCTATCATTTGTTTATTATATACATTTTACCCTCCTGTGCAGAGCTTTCTGTGTCGCTCGTTTACTTTGCTCCATATCAACAAAGTAAAAGAACCACACAGAAAGCTCTGCTCAGGGTTTACAGAAATATTGATATAAAATACTTCTA	0	0	0	0	1	0	20	1	1	4	5	2	24	10	5	0	19	5
miR-9445	TCGCGTTTCATTCTGATTGGTGGCTGAGTATTGCATGACTACCTCAAGCAGACAAGTCCAGCCAAAGGAATTACCAATTACCTTCCTGCGTAGAGCTTTCTGTGTCGCTCGTTTACTTTGCTCCACATCATTGATGTGGAGGAGGGTAAAGGAATACCAAACCAAAGTGAAATCGTCCTTGCTGAATCATGACTACTTGAT	0	0	0	0	1	0	20	1	1	4	5	2	24	10	5	0	19	5
miR-9445	TGAAACTATGTTAATAGAAGTGATTTTTGGAGGGGGAATGATACGAAGAAAATGTTGTCGTTTTTGGGGTCTGGTACCGATGCCCTCCTGAGCATAGCTTTCTGTGTCGCTCGTTTACTTTGTGGAGCAAATTAATCGAGCGACACAGAAAGCTCTGCGCAGAGAGTATGCTACCAAGGAATCTTAGTTTCTTTTCAAAGA	0	0	0	0	0	0	8	1	0	0	3	0	12	1	2	0	15	0
miR-9445	TGATACGAAGAAAATGTTGTCGTTTTTGGGGTCTGGTACCGATGCCCTCCTGAGCATAGCTTTCTGTGTCGCTCGTTTACTTTGTGGAGCAAATTAATCGAGCGACACAGAAAGCTCTGCGCAGAGAGTATGCTACCAAGGAATCTTAGTTTCTTTTCAAAGACTTTCTCCATTGACTAAAGATGGTCACAGTCACTGCTA	0	0	0	0	0	0	8	1	0	0	3	0	12	1	2	0	15	0
miR-9445	TGCTTATAATGGGTGGATAAAATTATAATGGTTGGATAAAATTTGATGCATGTTAACTTGAAAGACAGACACGCAGATGGATACCCTCTGCGCAGAGCTTTCTGTGTCGCTCGTTTACTTTGCTCTACATCAAAGCAATGTAAACGATGGACACGTGAAGCTCTGCGCAGGATGAAACAGAAAGACGGACATAGAGACAGA	0	0	0	0	1	0	21	1	2	4	5	2	26	12	5	0	20	5
miR-9445	TGTAGCCCAAACGTACCGGTTTAGAGGAAACCGACTGAAATTGCCAAGTAACCCCATGCGTTTTCCTTCAAACTACAACTACCCTTGTGCGCAGAGCTTTCTGTGTCGCTCGTTTACTTTGCTCCACATCAACAAGTAAAGTAAACGAGTGACACAGAAAGCTCTGCGCACGAGGGTAAACTACAACGTAAAATCTCAAGT	0	0	0	0	1	0	20	1	1	4	5	2	24	10	5	0	19	5
miR-9445	TTGTAGCCCAAACGTACCGGTTTAGAGGAAACCGACTGAAATTGCCAAGTAACCCCATGCGTTTTCCTTCAAACTACAACTACCCTTGTGCGCAGAGCTTTCTGTGTCGCTCGTTTACTTTGCTCCACATCAACAAGTAAAGTAAACGAGTGACACAGAAAGCTCTGCGCACGAGGGTAAACTACAACGTAAAATCTCAAG	0	0	0	0	1	0	20	1	1	4	5	2	24	10	5	0	19	5
miR-9445	TTTTTTTTTAACTAGGTGAATTATCACATAGGCTGTGAATGTGCCCGAGAAACCACACAATATGAAGCCTACAGGTACCTTACCCTCCTGCGCAGAACTTTCTGTGTCGCTCGTTTACTTTGCTCCACCTCAGCAAAGTAAAAAAAGAGACACAGAAAGCTCTGCGCAGGAGGGTAACGGGTAGCGTAAATGATCTAATAA	0	0	0	0	1	0	20	1	1	4	5	2	24	10	5	0	19	5
miR-9445	TTTTTTTTAACTAGGTGAATTATCACATAGGCTGTGAATGTGCCCGAGAAACCACACAATATGAAGCCTACAGGTACCTTACCCTCCTGCGCAGAACTTTCTGTGTCGCTCGTTTACTTTGCTCCACCTCAGCAAAGTAAAAAAAGAGACACAGAAAGCTCTGCGCAGGAGGGTAACGGGTAGCGTAAATGATCTAATAAA	0	0	0	0	1	0	20	1	1	4	5	2	24	10	5	0	19	5
miR-9445	TTTTTTTAACTAGGTGAATTATCACATAGGCTGTGAATGTGCCCGAGAAACCACACAATATGAAGCCTACAGGTACCTTACCCTCCTGCGCAGAACTTTCTGTGTCGCTCGTTTACTTTGCTCCACCTCAGCAAAGTAAAAAAAGAGACACAGAAAGCTCTGCGCAGGAGGGTAACGGGTAGCGTAAATGATCTAATAAAC	0	0	0	0	1	0	20	1	1	4	5	2	24	10	5	0	19	5
miR-9446	AACGACATAAGGACACTCTTATTTCCTATGTTAAAACTGTGAATGGTTCAAAATAATGACGACAGAGACATAACGACATAGGAGAAATAACATGGTTTTTTTTTTCTTATGTCGTCATGTCAATGTTGTTAGATAAGGACATAAGGGAACCAGCCTTTACTGTGCTATAATTTCATGCACACATTTTCTTTTCTTACTGTG	0	0	0	0	0	0	0	0	0	1	0	1	0	0	20	11	1	0
miR-9446	ATAACGACATAAGGACACTCTTATTTCCTATGTTAAAACTGTGAATGGTTCAAAATAATGACGACAGAGACATAACGACATAGGAGAAATAACATGGTTTTTTTTTTCTTATGTCGTCATGTCAATGTTGTTAGATAAGGACATAAGGGAACCAGCCTTTACTGTGCTATAATTTCATGCACACATTTTCTTTTCTTACTG	0	0	0	0	0	0	0	0	0	1	0	1	0	0	20	11	1	0
miR-9446	TAACGACATAAGGACACTCTTATTTCCTATGTTAAAACTGTGAATGGTTCAAAATAATGACGACAGAGACATAACGACATAGGAGAAATAACATGGTTTTTTTTTTCTTATGTCGTCATGTCAATGTTGTTAGATAAGGACATAAGGGAACCAGCCTTTACTGTGCTATAATTTCATGCACACATTTTCTTTTCTTACTGT	0	0	0	0	0	0	0	0	0	1	0	1	0	0	20	11	1	0
miR-9446	TTTTCTCAAGGCTGGTTCACAATAGCGACATAACGACATAAGGACACTCTTATTTCCTATGTTAAAACTGTGAATGGTTCAAAATAATGACGACAGAGACATAACGACATAGGAGAAATAACATGGTTTTTTTTTTCTTATGTCGTCATGTCAATGTTGTTAGATAAGGACATAAGGGAACCAGCCTTTACTGTGCTATAA	0	0	0	0	0	0	0	0	0	1	0	1	0	0	20	11	1	0
miR-9447	AAATTCTTTTTGTCCATAGCGCGCCCTATTCTAGAATGTGTGCGTTTTTGTCAGTTGTAATGTTTTTGCGTCTCGCGCCACTATTCTGATGTAAATAAGCAACGATTCACCTTCTTCAGTCTGCTGTAACAACGACAGTAGACTGTAGTTGGGCGGTACAGGTACCGGGCTTTACTTCGTTGTTACAAACTCAAGGTTTAC	6	6	5	2	10	5	6	18	15	6	2	1	6	4	3	0	5	0
miR-9447	AATTCTTTTTGTCCATAGCGCGCCCTATTCTAGAATGTGTGCGTTTTTGTCAGTTGTAATGTTTTTGCGTCTCGCGCCACTATTCTGATGTAAATAAGCAACGATTCACCTTCTTCAGTCTGCTGTAACAACGACAGTAGACTGTAGTTGGGCGGTACAGGTACCGGGCTTTACTTCGTTGTTACAAACTCAAGGTTTACC	6	6	5	2	10	5	6	18	15	6	2	1	6	4	3	0	5	0
miR-9447	ACCGAGGTCTTGAATGCACAGTCCAAGGCCTAAACTCTCGCGTCCCAGCTATCAACAGGGCAGACTGAAAAAGGTGAATCGTGACAAGCTAATTGGTGACGATTCACCTTCTTCAGTCTGCCCTGAAGAAGTCTAATTAAAGACGAAAATTAGGCAATTTTGGGTTTTTTCTATAAAATAATCCAAATATCCTATATAATA	6	8	6	2	18	7	4	20	16	5	1	1	6	3	0	0	3	1
miR-9447	AGACCGAGGTCTTGAATGCACAGTCCAAGGCCTAAACTCTCGCGTCCCAGCTATCAACAGGGCAGACTGAAAAAGGTGAATCGTGACAAGCTAATTGGTGACGATTCACCTTCTTCAGTCTGCCCTGAAGAAGTCTAATTAAAGACGAAAATTAGGCAATTTTGGGTTTTTTCTATAAAATAATCCAAATATCCTATATAA	6	8	6	2	18	7	4	20	16	5	1	1	6	3	0	0	3	1
miR-9447	ATTCTTTTTGTCCATAGCGCGCCCTATTCTAGAATGTGTGCGTTTTTGTCAGTTGTAATGTTTTTGCGTCTCGCGCCACTATTCTGATGTAAATAAGCAACGATTCACCTTCTTCAGTCTGCTGTAACAACGACAGTAGACTGTAGTTGGGCGGTACAGGTACCGGGCTTTACTTCGTTGTTACAAACTCAAGGTTTACCA	6	6	5	2	10	5	6	18	15	6	2	1	6	4	3	0	5	0
miR-9447	CCGAGGTCTTGAATGCACAGTCCAAGGCCTAAACTCTCGCGTCCCAGCTATCAACAGGGCAGACTGAAAAAGGTGAATCGTGACAAGCTAATTGGTGACGATTCACCTTCTTCAGTCTGCCCTGAAGAAGTCTAATTAAAGACGAAAATTAGGCAATTTTGGGTTTTTTCTATAAAATAATCCAAATATCCTATATAATAC	6	8	6	2	18	7	4	20	16	5	1	1	6	3	0	0	3	1
miR-9447	CTTGAATGCACGGTCCTATGCGGCGCAACAAGAAACTCTCGCGTCTCAGCTATCAACTGGGCAGACTGAAAAAGGTGAATCGTGACAAGCTAGTTGGTGACGATTCACCTTCTTCAGTCTGCCCTGAAGAAGTCTAATTAAGGACGAAAATTAGGCATTTTTTGTTTTTTTCTATAAAATAATCCAAATTTCCTATATAAT	6	8	6	2	18	7	4	20	16	5	1	1	6	3	0	0	2	1
miR-9447	GACCGAGGTCTTGAATGCACAGTCCAAGGCCTAAACTCTCGCGTCCCAGCTATCAACAGGGCAGACTGAAAAAGGTGAATCGTGACAAGCTAATTGGTGACGATTCACCTTCTTCAGTCTGCCCTGAAGAAGTCTAATTAAAGACGAAAATTAGGCAATTTTGGGTTTTTTCTATAAAATAATCCAAATATCCTATATAAT	6	8	6	2	18	7	4	20	16	5	1	1	6	3	0	0	3	1
miR-9447	GTAATGTTTTTGCGTCTCGCGCCACTATTCTGATGTAAATAAGCAACGATTCACCTTCTTCAGTCTGCTGTAACAACGACAGTAGACTGTAGTTGGGCGGTACAGGTACCGGGCTTTACTTCGTTGTTACAAACTCAAGGTTTACCAGATATTGACTGCGGCTTCTACCGCACCCCTTTTTATATGGTCCTACAACGGCGT	6	6	5	1	10	5	7	17	15	5	1	1	6	4	0	0	2	0
miR-9447	TCTTGAATGCACGGTCCTATGCGGCGCAACAAGAAACTCTCGCGTCTCAGCTATCAACTGGGCAGACTGAAAAAGGTGAATCGTGACAAGCTAGTTGGTGACGATTCACCTTCTTCAGTCTGCCCTGAAGAAGTCTAATTAAGGACGAAAATTAGGCATTTTTTGTTTTTTTCTATAAAATAATCCAAATTTCCTATATAA	6	8	6	2	18	7	4	20	16	5	1	1	6	3	0	0	2	1
miR-9447	TGAATGCACGGTCCTATGCGGCGCAACAAGAAACTCTCGCGTCTCAGCTATCAACTGGGCAGACTGAAAAAGGTGAATCGTGACAAGCTAGTTGGTGACGATTCACCTTCTTCAGTCTGCCCTGAAGAAGTCTAATTAAGGACGAAAATTAGGCATTTTTTGTTTTTTTCTATAAAATAATCCAAATTTCCTATATAATAC	6	8	6	2	18	7	4	20	16	5	1	1	6	3	0	0	2	1
miR-9447	TTGAATGCACGGTCCTATGCGGCGCAACAAGAAACTCTCGCGTCTCAGCTATCAACTGGGCAGACTGAAAAAGGTGAATCGTGACAAGCTAGTTGGTGACGATTCACCTTCTTCAGTCTGCCCTGAAGAAGTCTAATTAAGGACGAAAATTAGGCATTTTTTGTTTTTTTCTATAAAATAATCCAAATTTCCTATATAATA	6	8	6	2	18	7	4	20	16	5	1	1	6	3	0	0	2	1
miR-9447	TTGGAAGTAGGAACCCACGTAGAGATATGTAAATTCTTTTTGTCCATAGCGCGCCCTATTCTAGAATGTGTGCGTTTTTGTCAGTTGTAATGTTTTTGCGTCTCGCGCCACTATTCTGATGTAAATAAGCAACGATTCACCTTCTTCAGTCTGCTGTAACAACGACAGTAGACTGTAGTTGGGCGGTACAGGTACCGGGCT	6	6	4	2	10	5	5	18	15	6	2	1	6	4	3	0	6	0
miR-9448	AGATAGATACAGATGTCTAGACCACAGAGTGCATGCATAATTCCGTCTGATCACAAGGAACTATTGTCTCCTCCGCAGCCGTCCCTAGTGTCAGTCTCAAACACTAAGGACGGCTGCGCAGGAGACTAAAGGAACTACTGCCTCTTTGCACGTTTTTTTTTTATATTGGAACGATAGTATTATCAAACAAATGACGTTTCA	0	0	0	0	0	1	11	0	5	1	0	1	12	2	20	1	13	1
miR-9448	GATACAGATGTCTAGACCACAGAGTGCATGCATAATTCCGTCTGATCACAAGGAACTATTGTCTCCTCCGCAGCCGTCCCTAGTGTCAGTCTCAAACACTAAGGACGGCTGCGCAGGAGACTAAAGGAACTACTGCCTCTTTGCACGTTTTTTTTTTATATTGGAACGATAGTATTATCAAACAAATGACGTTTCACGTAA	0	0	0	0	0	1	11	0	5	1	0	1	12	2	20	1	13	1
miR-9448	TTCTATTAGAAACTTCTAGTATATAGTATAGATAGATACAGATGTCTAGACCACAGAGTGCATGCATAATTCCGTCTGATCACAAGGAACTATTGTCTCCTCCGCAGCCGTCCCTAGTGTCAGTCTCAAACACTAAGGACGGCTGCGCAGGAGACTAAAGGAACTACTGCCTCTTTGCACGTTTTTTTTTTATATTGGAAC	0	0	0	0	0	1	11	0	5	1	0	1	12	2	20	1	13	1
miR-9449	CCGTTAGGAAAGAACTTCAAGACGGTGCGGTGCAAACCCTTCTCTCGTTTTTTACTTGTTGGGAGGGACGTGGACGATTGAGGACGACGGGCAAGCGTTCTATCTCCTTAAACATTCATCGTCTTGTACACGATGGTTGTTTAAGGAGCTGAAACGCTATCTTGTGATCTCGGGGATGACTCGGTCTTCTCCAAGAAGAGG	0	0	0	1	0	0	1	0	0	0	0	0	1	1	16	7	4	1
miR-9449	CCGTTGGGAAAGAACTTCAAGACGGTGCGGTGCAACCCCTTCTCTCGTTTTTTACTTGTTGGGAGGGACGTGGACGATTGAGGACGACGGGTAAGCGTTCTATCTCCTTAAACATTCATCGTCTTGTACACGATGGTTGTTTAAGGAGCTGAAACGCTATCTTGTGATCTCGGGGATGACTCGGTGTTCTCCAAGAAGAGG	0	0	0	1	0	0	1	0	0	0	0	0	1	1	16	7	4	1
miR-2039	TATGAAGTGCAATATTCTATCTACCCAAACAAACTTACTTTCTGGAAATCTGGCTGAGTGTTACAATTGTATAAGCCTACCTTTATTTTATTTTATATGTAAATAAAATAAAGGTAGGCTCTCTAACGCACCAGCAATTTTGCTAAACGTGAACGATACAGTTCATTCGCAGCTGCGACGCAGGATAATGGAGACTTTAAA	0	1	1	0	0	0	1	0	0	1	1	0	5	1	12	0	15	0
miR-2039	TGAAGTGCAATATTCTATCTACCCAAACAAACTTACTTTCTGGAAATCTGGCTGAGTGTTACAATTGTATAAGCCTACCTTTATTTTATTTTATATGTAAATAAAATAAAGGTAGGCTCTCTAACGCACCAGCAATTTTGCTAAACGTGAACGATACAGTTCATTCGCAGCTGCGACGCAGGATAATGGAGACTTTAAACA	0	1	1	0	0	0	1	0	0	1	1	0	5	1	12	0	15	0
miR-9450	AGAACTACTATGATTGCAAATCACTTCCCAAGAAATAAAGCAAAATTGATTGCTACATTATTTTAAACCAAGGCAAACACAGCCATGGAGGAGGCACAGAGATTCTTTAGAAATCAGTGGGCTTCAGTGAATTCTGCAGTGTACTTAAATGAAGAAGCTAAAGTTTGGTAGTAAGCAGGAGATAATGAATTCTGTATAGTT	14	12	8	13	13	7	1	1	0	1	0	1	2	5	0	4	3	2
miR-9450	CAGAACTACTATGATTGCAAATCACTTCCCAAGAAATAAAGCAAAATTGATTGCTACATTATTTTAAACCAAGGCAAACACAGCCATGGAGGAGGCACAGAGATTCTTTAGAAATCAGTGGGCTTCAGTGAATTCTGCAGTGTACTTAAATGAAGAAGCTAAAGTTTGGTAGTAAGCAGGAGATAATGAATTCTGTATAGT	14	12	8	13	13	7	1	1	0	1	0	1	2	5	0	4	3	2
miR-9450	CCAGAACTACTATGATTGCAAATCACTTCCCAAGAAATAAAGCAAAATTGATTGCTACATTATTTTAAACCAAGGCAAACACAGCCATGGAGGAGGCACAGAGATTCTTTAGAAATCAGTGGGCTTCAGTGAATTCTGCAGTGTACTTAAATGAAGAAGCTAAAGTTTGGTAGTAAGCAGGAGATAATGAATTCTGTATAG	14	12	8	13	13	7	1	1	0	1	0	1	2	5	0	4	3	2
miR-9450	GAACTACTATGATTGCAAATCACTTCCCAAGAAATAAAGCAAAATTGATTGCTACATTATTTTAAACCAAGGCAAACACAGCCATGGAGGAGGCACAGAGATTCTTTAGAAATCAGTGGGCTTCAGTGAATTCTGCAGTGTACTTAAATGAAGAAGCTAAAGTTTGGTAGTAAGCAGGAGATAATGAATTCTGTATAGTTA	14	12	8	13	13	7	1	1	0	1	0	1	2	5	0	4	3	2
miR-9451	AGGTTTTTTTGGACAAATTCTTGCCACGAGTCTCAAATTGACAGGAATCACCATATTTTCTGGAGATCAGGGAGCGGGAAAACTTTAGCTCTTATAAATATGGGCATCAATGACCATATAAGGCAATCCTTGGGTAATATGTTTGATATGATTTAGTCGTTTGGAGCTCCGCTTTAAGGAAATGCTTAAATCCATATATTA	6	8	3	4	19	11	27	20	15	17	14	14	10	6	0	0	4	0
miR-9451	ATTAGTGAGATAAAAAATTGACCAAGCTGTCAGGTTTTTTTGGACAAATTCTTGCCACGAGTCTCAAATTGACAGGAATCACCATATTTTCTGGAGATCAGGGAGCGGGAAAACTTTAGCTCTTATAAATATGGGCATCAATGACCATATAAGGCAATCCTTGGGTAATATGTTTGATATGATTTAGTCGTTTGGAGCTCC	6	8	4	4	20	11	27	20	15	17	14	14	10	7	0	0	4	0
miR-9451	CCGCTGTCAATCTTTGGATGGGCTGGGTCTAAGGGCTTTTCAAGATTAGTGAGATAAAAAATTGACCAAGCTGTCAGGTTTTTTTGGACAAATTCTTGCCACGAGTCTCAAATTGACAGGAATCACCATATTTTCTGGAGATCAGGGAGCGGGAAAACTTTAGCTCTTATAAATATGGGCATCAATGACCATATAAGGCAA	8	9	6	4	22	15	30	22	17	19	16	17	13	8	0	0	4	1
miR-9451	CGCTGTCAATCTTTGGATGGGCTGGGTCTAAGGGCTTTTCAAGATTAGTGAGATAAAAAATTGACCAAGCTGTCAGGTTTTTTTGGACAAATTCTTGCCACGAGTCTCAAATTGACAGGAATCACCATATTTTCTGGAGATCAGGGAGCGGGAAAACTTTAGCTCTTATAAATATGGGCATCAATGACCATATAAGGCAAT	8	9	6	4	22	15	30	22	17	19	16	17	13	8	0	0	4	1
miR-9451	GCTGTCAATCTTTGGATGGGCTGGGTCTAAGGGCTTTTCAAGATTAGTGAGATAAAAAATTGACCAAGCTGTCAGGTTTTTTTGGACAAATTCTTGCCACGAGTCTCAAATTGACAGGAATCACCATATTTTCTGGAGATCAGGGAGCGGGAAAACTTTAGCTCTTATAAATATGGGCATCAATGACCATATAAGGCAATC	8	9	6	4	22	15	30	22	17	19	16	17	13	8	0	0	4	1
miR-9451	GCTTTTCAAGATTAGTGAGATAAAAAATTGACCAAGCTGTCAGGTTTTTTTGGACAAATTCTTGCCACGAGTCTCAAATTGACAGGAATCACCATATTTTCTGGAGATCAGGGAGCGGGAAAACTTTAGCTCTTATAAATATGGGCATCAATGACCATATAAGGCAATCCTTGGGTAATATGTTTGATATGATTTAGTCGT	7	8	4	4	20	14	29	21	16	18	16	17	12	7	0	0	4	0
miR-9451	GTCTAAGGGCTTTTCAAGATTAGTGAGATAAAAAATTGACCAAGCTGTCAGGTTTTTTTGGACAAATTCTTGCCACGAGTCTCAAATTGACAGGAATCACCATATTTTCTGGAGATCAGGGAGCGGGAAAACTTTAGCTCTTATAAATATGGGCATCAATGACCATATAAGGCAATCCTTGGGTAATATGTTTGATATGAT	7	8	5	4	20	14	29	21	16	19	16	17	13	7	0	0	4	0
miR-9451	TTTTTGGACAAATTCTTGCCACGAGTCTCAAATTGACAGGAATCACCATATTTTCTGGAGATCAGGGAGCGGGAAAACTTTAGCTCTTATAAATATGGGCATCAATGACCATATAAGGCAATCCTTGGGTAATATGTTTGATATGATTTAGTCGTTTGGAGCTCCGCTTTAAGGAAATGCTTAAATCCATATATTAATTTT	6	8	3	4	19	11	27	20	15	17	14	14	10	6	0	0	4	0
miR-9452	AAGGAGGAAAAGGGGCCCTAACAGATGAGGAAAAGAAATAAATTTTTATTGATTTACTAACACTGCTAGATGAAGTTTGCAACAAAGCAAAATGCTATGTTCTTGTTGGAGGTGACTTCAATCTTAATTATGCGAAAGCTAAAGAAGTAGTTCAAGAAAGATCAACCATAGCAAGTACAAGTACAACCTGTACACAAATGG	2	2	4	6	11	12	17	7	7	13	13	9	9	23	5	4	4	0
miR-9452	CTGTTGGTTGCTTCCTATCACGGACGTCAAAATAGAAAAGGAGGAAAAGGGGCCCTAACAGATGAGGAAAAGAAATAAATTTTTATTGATTTACTAACACTGCTAGATGAAGTTTGCAACAAAGCAAAATGCTATGTTCTTGTTGGAGGTGACTTCAATCTTAATTATGCGAAAGCTAAAGAAGTAGTTCAAGAAAGATCA	2	2	4	6	11	12	18	7	6	12	13	7	9	23	5	4	4	0
miR-9452	TGTTGGTTGCTTCCTATCACGGACGTCAAAATAGAAAAGGAGGAAAAGGGGCCCTAACAGATGAGGAAAAGAAATAAATTTTTATTGATTTACTAACACTGCTAGATGAAGTTTGCAACAAAGCAAAATGCTATGTTCTTGTTGGAGGTGACTTCAATCTTAATTATGCGAAAGCTAAAGAAGTAGTTCAAGAAAGATCAA	2	2	4	6	11	12	18	7	6	12	13	7	9	23	5	4	4	0
miR-9453	ATTAGGTAAACATCTCCTTCATCTGTCTGTTAAGAGTCAATTTCGTTGTTGCGCGACATCCTAAAATCCTTTCTTCGTTTGTGAATAGCTTGTGTTTGATACGCGCTATTCCCAAACGGGACAAGGATTTTGGATTTGCAGAGGTCGCGCAACAAGAAATTTGGCTGTAACGGAGGCAAATGCCTTCTTTGTCTATACGCT	0	1	0	1	0	0	1	2	0	0	0	0	2	0	18	1	2	0
miR-9453	CTATCTTTTGCGAAGAGGTTCCACACGAATTAGGTAAACATCTCCTTCATCTGTCTGTTAAGAGTCAATTTCGTTGTTGCGCGACATCCTAAAATCCTTTCTTCGTTTGTGAATAGCTTGTGTTTGATACGCGCTATTCCCAAACGGGACAAGGATTTTGGATTTGCAGAGGTCGCGCAACAAGAAATTTGGCTGTAACGG	0	1	0	1	0	0	1	2	0	0	0	0	2	0	18	1	2	0
miR-9453	GCTATCTTTTGCGAAGAGGTTCCACACGAATTAGGTAAACATCTCCTTCATCTGTCTGTTAAGAGTCAATTTCGTTGTTGCGCGACATCCTAAAATCCTTTCTTCGTTTGTGAATAGCTTGTGTTTGATACGCGCTATTCCCAAACGGGACAAGGATTTTGGATTTGCAGAGGTCGCGCAACAAGAAATTTGGCTGTAACG	0	1	0	1	0	0	1	2	0	0	0	0	2	0	18	1	2	0
miR-9453	TAGGTAAACATCTCCTTCATCTGTCTGTTAAGAGTCAATTTCGTTGTTGCGCGACATCCTAAAATCCTTTCTTCGTTTGTGAATAGCTTGTGTTTGATACGCGCTATTCCCAAACGGGACAAGGATTTTGGATTTGCAGAGGTCGCGCAACAAGAAATTTGGCTGTAACGGAGGCAAATGCCTTCTTTGTCTATACGCTTT	0	1	0	1	0	0	1	2	0	0	0	0	2	0	18	1	2	0
miR-9453	TTGCTATCTTTTGCGAAGAGGTTCCACACGAATTAGGTAAACATCTCCTTCATCTGTCTGTTAAGAGTCAATTTCGTTGTTGCGCGACATCCTAAAATCCTTTCTTCGTTTGTGAATAGCTTGTGTTTGATACGCGCTATTCCCAAACGGGACAAGGATTTTGGATTTGCAGAGGTCGCGCAACAAGAAATTTGGCTGTAA	0	1	0	1	0	0	1	2	0	0	0	0	2	0	18	1	2	0
miR-9454	AATAAAATTCAAGAAACGGATGTGTTTTAAGTAGTGTTATTGATTGTCCCTAGAGAGAAGAAAGAGCATGAGCGTGCTATCTAAATGCTATCTAAGACAGTACCAGGTCACTGTTTTTGAGGCATGACAAAGTGTCTGGAAAAACGCGAGGTTGGAGTTAGGAAACAACGGGAAGGACTAAAATATCGAGGACCTGTCCGT	4	6	6	4	15	23	11	8	8	2	2	2	1	2	0	0	5	1
miR-9454	ATAAAATTCAAGAAACGGATGTGTTTTAAGTAGTGTTATTGATTGTCCCTAGAGAGAAGAAAGAGCATGAGCGTGCTATCTAAATGCTATCTAAGACAGTACCAGGTCACTGTTTTTGAGGCATGACAAAGTGTCTGGAAAAACGCGAGGTTGGAGTTAGGAAACAACGGGAAGGACTAAAATATCGAGGACCTGTCCGTC	4	6	6	4	15	23	11	8	8	2	2	2	1	2	0	0	5	1
miR-9455	TTTATATATACTAATACGTAAATTCTACCCCTCAGCATGTACCTGTCCAAGATAATGCTCTAACTTAGACCCTGTTCACACGGAACCGGATGAATATTCGTCCAGACCTGTGTGAATAGGGTCTTAAGAGGGAGGACTGCTCAAAGAAATAAAATTTAGAATCATTTTTAAAGGTACTGTACATATATTTACCTGTTACTG	0	0	0	0	0	0	0	0	0	0	0	0	0	0	6	11	0	0
miR-9455	TTTTATATATACTAATACGTAAATTCTACCCCTCAGCATGTACCTGTCCAAGATAATGCTCTAACTTAGACCCTGTTCACACGGAACCGGATGAATATTCGTCCAGACCTGTGTGAATAGGGTCTTAAGAGGGAGGACTGCTCAAAGAAATAAAATTTAGAATCATTTTTAAAGGTACTGTACATATATTTACCTGTTACT	0	0	0	0	0	0	0	0	0	0	0	0	0	0	6	11	0	0
miR-2031	AAATGATATGGCGGATCTAGGTGATGAGACGTACCCTATTTGGTCTGACGTATCCTAAATGGTCTGACCTACCCTATGTGGTGTTTTAACCACCTAAAATACGGCACTCTATTTATGGTACTTAAAAGTACCATAAATAGAGTGCCGTATTTTAGGTGGTCTGACGTACCCATAATAATATGACGTAGCCTAAGTGGTCTA	0	0	0	0	11	2	15	6	11	2	2	5	8	9	10	1	1	1
miR-2031	AATGATATGGCGGATCTAGGTGATGAGACGTACCCTATTTGGTCTGACGTATCCTAAATGGTCTGACCTACCCTATGTGGTGTTTTAACCACCTAAAATACGGCACTCTATTTATGGTACTTAAAAGTACCATAAATAGAGTGCCGTATTTTAGGTGGTCTGACGTACCCATAATAATATGACGTAGCCTAAGTGGTCTAA	0	0	0	0	11	2	15	6	11	2	2	5	8	9	10	1	1	1
miR-2031	ACGGTACGGCAGACCATTTAGGGTACGTCAAACCATTATGGTTACGTTAGACCACTTAGGCTACGTCATATTATTATGGGTACGTCAGACCACCTAAAATACGGCACTCTATTTATGGTACTTTTAAGTACCATAAATAGAGTGCCGTATTTTAGGTGGTTAAAACACCACATAGGGTAGGTCAGACCATTTAGGATACGT	0	0	0	0	11	2	15	6	11	2	2	5	8	9	10	1	1	1
miR-2031	ACGTACCCTATTTGGTCTGACGTATCCTAAATGGTCTGACCTACCCTATGTGGTGTTTTAACCACCTAAAATACGGCACTCTATTTATGGTACTTAAAAGTACCATAAATAGAGTGCCGTATTTTAGGTGGTCTGACGTACCCATAATAATATGACGTAGCCTAAGTGGTCTAACGTAACCATAATGGTTTGACGTACCCT	0	0	0	0	11	2	15	6	11	2	2	5	8	9	10	1	1	1
miR-2031	CAAACCATTATGGTTACGTTAGACCACTTAGGCTACGTCATATTATTATGGGTACGTCAGACCACCTAAAATACGGCACTCTATTTATGGTACTTTTAAGTACCATAAATAGAGTGCCGTATTTTAGGTGGTTAAAACACCACATAGGGTAGGTCAGACCATTTAGGATACGTCAGACCAAATAGGGTACGTCTCATCACC	0	0	0	0	11	2	15	6	11	2	2	5	8	9	10	1	1	1
miR-2031	CGGTACGGCAGACCATTTAGGGTACGTCAAACCATTATGGTTACGTTAGACCACTTAGGCTACGTCATATTATTATGGGTACGTCAGACCACCTAAAATACGGCACTCTATTTATGGTACTTTTAAGTACCATAAATAGAGTGCCGTATTTTAGGTGGTTAAAACACCACATAGGGTAGGTCAGACCATTTAGGATACGTC	0	0	0	0	11	2	15	6	11	2	2	5	8	9	10	1	1	1
miR-2031	TAAATGATATGGCGGATCTAGGTGATGAGACGTACCCTATTTGGTCTGACGTATCCTAAATGGTCTGACCTACCCTATGTGGTGTTTTAACCACCTAAAATACGGCACTCTATTTATGGTACTTAAAAGTACCATAAATAGAGTGCCGTATTTTAGGTGGTCTGACGTACCCATAATAATATGACGTAGCCTAAGTGGTCT	0	0	0	0	11	2	15	6	11	2	2	5	8	9	10	1	1	1
miR-2031	TACGGTACGGCAGACCATTTAGGGTACGTCAAACCATTATGGTTACGTTAGACCACTTAGGCTACGTCATATTATTATGGGTACGTCAGACCACCTAAAATACGGCACTCTATTTATGGTACTTTTAAGTACCATAAATAGAGTGCCGTATTTTAGGTGGTTAAAACACCACATAGGGTAGGTCAGACCATTTAGGATACG	0	0	0	0	11	2	15	6	11	2	2	5	8	9	10	1	1	1
miR-9456	AAAGCCTTATTGACGTTTCTCGTATTTTAGTGCACTCACAAAGCTTGTTGTTGTTTAAAGTGTCCCTGTAAGCCAAAAGGCGACCTAGCTTACGTGAAGCCGCTGACTCGCGAAATCCTCTCGTAGCTACGAGAGGATCTCGCGAGTCAGCGGCTACACGTAGGCTAAAGGCGACCTAGCAAAGTATCAAGTGTGAGAAAG	0	0	0	0	6	0	10	0	7	1	3	0	13	1	9	1	0	0
miR-9456	AACCAAGTCCGGGTTTTACGCTTTGCTAACCCAAGTCAAAAGCTATTATAGTCCTTCCAAGTCCTTCTAGGTTGTTATGGAAAAGTAGCCTACGTATAGCCGCTGACTCGCGAAATCCTCTCGTAGCGAGGATTTCGCGAGTCAGCGGCTACACGTAGGCTAATGAAAGCTTCGATCCTAAACATGTGCCACTGAACGAAT	0	0	0	0	7	0	10	0	6	1	3	0	14	1	7	1	0	0
miR-9456	ACCCAAGTCAAAAGCTATTATAGTCCTTCCAAGTCCTTCTAGGTTGTTATGGAAAAGTAGCCTACGTATAGCCGCTGACTCGCGAAATCCTCTCGTAGCGAGGATTTCGCGAGTCAGCGGCTACACGTAGGCTAATGAAAGCTTCGATCCTAAACATGTGCCACTGAACGAATCAGATAACAGCACTTACAAACGCATTAA	0	0	0	0	7	0	10	0	6	1	3	0	14	1	7	1	0	0
miR-9456	ACTCACAAAGCTTGTTGTTGTTTAAAGTGTCCCTGTAAGCCAAAAGGCGACCTAGCTTACGTGAAGCCGCTGACTCGCGAAATCCTCTCGTAGCTACGAGAGGATCTCGCGAGTCAGCGGCTACACGTAGGCTAAAGGCGACCTAGCAAAGTATCAAGTGTGAGAAAGCATCTATTTACTTCGGCTGATTTAAGGAAGTTG	0	0	0	0	6	0	10	0	7	1	3	0	13	1	9	1	0	0
miR-9456	CAACCAAGTCCGGGTTTTACGCTTTGCTAACCCAAGTCAAAAGCTATTATAGTCCTTCCAAGTCCTTCTAGGTTGTTATGGAAAAGTAGCCTACGTATAGCCGCTGACTCGCGAAATCCTCTCGTAGCGAGGATTTCGCGAGTCAGCGGCTACACGTAGGCTAATGAAAGCTTCGATCCTAAACATGTGCCACTGAACGAA	0	0	0	0	7	0	10	0	6	1	3	0	14	1	7	1	0	0
miR-9456	CAAGTCAAAAGCTATTATAGTCCTTCCAAGTCCTTCTAGGTTGTTATGGAAAAGTAGCCTACGTATAGCCGCTGACTCGCGAAATCCTCTCGTAGCGAGGATTTCGCGAGTCAGCGGCTACACGTAGGCTAATGAAAGCTTCGATCCTAAACATGTGCCACTGAACGAATCAGATAACAGCACTTACAAACGCATTAACAC	0	0	0	0	7	0	10	0	6	1	3	0	14	1	7	1	0	0
miR-9456	CACTCACAAAGCTTGTTGTTGTTTAAAGTGTCCCTGTAAGCCAAAAGGCGACCTAGCTTACGTGAAGCCGCTGACTCGCGAAATCCTCTCGTAGCTACGAGAGGATCTCGCGAGTCAGCGGCTACACGTAGGCTAAAGGCGACCTAGCAAAGTATCAAGTGTGAGAAAGCATCTATTTACTTCGGCTGATTTAAGGAAGTT	0	0	0	0	6	0	10	0	7	1	3	0	13	1	9	1	0	0
miR-9456	CCCAAGTCAAAAGCTATTATAGTCCTTCCAAGTCCTTCTAGGTTGTTATGGAAAAGTAGCCTACGTATAGCCGCTGACTCGCGAAATCCTCTCGTAGCGAGGATTTCGCGAGTCAGCGGCTACACGTAGGCTAATGAAAGCTTCGATCCTAAACATGTGCCACTGAACGAATCAGATAACAGCACTTACAAACGCATTAAC	0	0	0	0	7	0	10	0	6	1	3	0	14	1	7	1	0	0
miR-9456	GAAAGCCTTATTGACGTTTCTCGTATTTTAGTGCACTCACAAAGCTTGTTGTTGTTTAAAGTGTCCCTGTAAGCCAAAAGGCGACCTAGCTTACGTGAAGCCGCTGACTCGCGAAATCCTCTCGTAGCTACGAGAGGATCTCGCGAGTCAGCGGCTACACGTAGGCTAAAGGCGACCTAGCAAAGTATCAAGTGTGAGAAA	0	0	0	0	6	0	10	0	7	1	3	0	13	1	9	1	0	0
miR-9456	TGGCAACCAAGTCCGGGTTTTACGCTTTGCTAACCCAAGTCAAAAGCTATTATAGTCCTTCCAAGTCCTTCTAGGTTGTTATGGAAAAGTAGCCTACGTATAGCCGCTGACTCGCGAAATCCTCTCGTAGCGAGGATTTCGCGAGTCAGCGGCTACACGTAGGCTAATGAAAGCTTCGATCCTAAACATGTGCCACTGAAC	0	0	0	0	7	0	10	0	6	1	3	0	14	1	7	1	0	0
miR-9457	AAACTACAGCAGCAGCTGGCACAAGAAGACTATCCCCTTTGGCTGCTCCCTGATGTCTTTTTCTGGAACTACACATTCTAAGAAAAGTGCTCTTAAAGAGCACTTTTCTTAGAATGTGTAGTTCCAGAAAATACCCACCCCCCCCCCCCGCCATGGAGGGGGTAGATATGACCCCACCTACCTTCTCCCTACCCTCCCCCT	0	0	0	0	6	0	12	1	8	0	6	0	3	0	6	2	0	0
miR-9457	AATAGAAATCCAAGTAGGGGGAGGGTAGGGAGAAGGTAGGTGGGGTCATATCTACCCCCTCCATGGCGGGGGGGGGGGGTGGGTATTTTCTGGAACTACACATTCTAAGAAAAGTGCTCTTTAAGAGCACTTTTCTTAGAATGTGTAGTTCCAGAAAAAGACATCAGGGAGCAGCCAAAGGGGATAGTCTTCTTGTGCCAG	0	0	0	0	6	0	12	1	8	0	6	0	4	0	6	2	1	0
miR-9457	CAAAATAGAAATCCAAGTAGGGGGAGGGTAGGGAGAAGGTAGGTGGGGTCATATCTACCCCCTCCATGGCGGGGGGGGGGGGTGGGTATTTTCTGGAACTACACATTCTAAGAAAAGTGCTCTTTAAGAGCACTTTTCTTAGAATGTGTAGTTCCAGAAAAAGACATCAGGGAGCAGCCAAAGGGGATAGTCTTCTTGTGC	0	0	0	0	6	0	12	2	8	0	6	0	4	0	6	2	1	0
miR-9457	CCAAAATAGAAATCCAAGTAGGGGGAGGGTAGGGAGAAGGTAGGTGGGGTCATATCTACCCCCTCCATGGCGGGGGGGGGGGGTGGGTATTTTCTGGAACTACACATTCTAAGAAAAGTGCTCTTTAAGAGCACTTTTCTTAGAATGTGTAGTTCCAGAAAAAGACATCAGGGAGCAGCCAAAGGGGATAGTCTTCTTGTG	0	0	0	0	6	0	12	2	8	0	6	0	4	0	6	2	1	0
miR-9457	CTTTGTGAAATGGCACCTCCTGCACACTTGAAACTACAGCAGCAGCTGGCACAAGAAGACTATCCCCTTTGGCTGCTCCCTGATGTCTTTTTCTGGAACTACACATTCTAAGAAAAGTGCTCTTAAAGAGCACTTTTCTTAGAATGTGTAGTTCCAGAAAATACCCACCCCCCCCCCCCGCCATGGAGGGGGTAGATATGA	0	0	0	0	6	0	12	1	8	0	6	0	3	0	6	2	0	0
miR-9457	GCTTTGTGAAATGGCACCTCCTGCACACTTGAAACTACAGCAGCAGCTGGCACAAGAAGACTATCCCCTTTGGCTGCTCCCTGATGTCTTTTTCTGGAACTACACATTCTAAGAAAAGTGCTCTTAAAGAGCACTTTTCTTAGAATGTGTAGTTCCAGAAAATACCCACCCCCCCCCCCCGCCATGGAGGGGGTAGATATG	0	0	0	0	6	0	12	1	8	0	6	0	3	0	6	2	0	0
miR-9457	GGGAGAAGGTAGGTGGGGTCATATCTACCCCCTCCATGGCGGGGGGGGGGGGTGGGTATTTTCTGGAACTACACATTCTAAGAAAAGTGCTCTTTAAGAGCACTTTTCTTAGAATGTGTAGTTCCAGAAAAAGACATCAGGGAGCAGCCAAAGGGGATAGTCTTCTTGTGCCAGCTGCTGCTGTAGTTTCAAGTGTGCAGG	0	0	0	0	6	0	12	1	8	0	6	0	3	0	6	2	1	0
miR-9457	TGTGAAATGGCACCTCCTGCACACTTGAAACTACAGCAGCAGCTGGCACAAGAAGACTATCCCCTTTGGCTGCTCCCTGATGTCTTTTTCTGGAACTACACATTCTAAGAAAAGTGCTCTTAAAGAGCACTTTTCTTAGAATGTGTAGTTCCAGAAAATACCCACCCCCCCCCCCCGCCATGGAGGGGGTAGATATGACCC	0	0	0	0	6	0	12	1	8	0	6	0	3	0	6	2	0	0
miR-9458	AAGCAAAAAAGGAGCTAAAGCTGCAGAGGCTCAGCCCGAAAAGAAGGCAGAGGCGCCTGAAGAAAAGCCTGCAGAGGACTCTAAAGATCAAGCTGTTGAAGAAAGTGAGACAAAGGACGCGAGCAAAGATGGAGAGGGCAATGCTGCGGACAAGCGGGCACGAGGCCGTCCTAAAAAAGCTGACGGCGAACCTGCCACCAA	1	1	3	3	25	11	50	33	29	21	30	22	38	35	104	121	1	4
miR-9459	TAGCTCCCCAGAGTCAATTCCAACTATATGAGCAAACTCGTTTATTAAATGCCCAATAAATACCCGTTTACACCTTCCTTGGTATCTAGCAACTGGCGACGAGCTGGTGAAGGACTCAACGACCAAAGGATCGTAAGTAAACACTGCAAATTCTGCATTTACTCTTCGATCAAATCTAACGGAATTCAAGATGGCTGCCAG	4	1	2	3	7	16	68	31	19	59	55	57	100	83	12	4	111	125
miR-9459	TCCCCAGAGTCAATTCCAACTATATGAGCAAACTCGTTTATTAAATGCCCAATAAATACCCGTTTACACCTTCCTTGGTATCTAGCAACTGGCGACGAGCTGGTGAAGGACTCAACGACCAAAGGATCGTAAGTAAACACTGCAAATTCTGCATTTACTCTTCGATCAAATCTAACGGAATTCAAGATGGCTGCCAGTCAT	4	1	2	3	9	16	70	31	19	59	55	57	101	85	14	6	112	125
miR-9460	ATGTCCCCAGACCGCATTGGACTGTGAATAAACCTAATCAGATTCACCAAGCCGATCTGTTGTTTATGCCCCACGATAACGTAGGCAGAAAAACCTACCGTTACGCGTTGGTCGTGATTGATATTGCCTCGAGATATAAAGATGCAGAAGCACTGACTACCAAGGACTCGAGTGGAATTGCTAAAGGGTTTGAAAAGATAT	25	56	30	42	156	98	54	71	65	19	11	11	40	34	7	14	16	27
miR-9460	ATGTCCCCTGACCGCATTGGACTGTGAATAAACCTAATCAGATTCACCAAGCCGATCTGTTGTTTATGCCCCACGATAACGTAGGCAGAAAAACCTACCGTTACGCGTTGGTCGTGATTGATATTGCCTCGAGATATAAAGATGCAGAAGCACTGACTACTAAGGATTCGAGTGCAATTGCTAAAGGGTTTGAAAAGATAT	24	56	30	41	154	97	51	69	63	17	11	10	38	34	6	12	15	25
miR-9460	ATGTCCCCAGACCGCATTGGACTGTGAATAAACCTAATCAGATTCACCAAGCCGATCTGTTGTTTATGCCCCACGATAACGTAGGCAGAAAAACCTACCGTTACGCGTTGGTCGTGATTGATATTGCCTCGAGATATAAAGATGCAGAAGCACTGACTACCAAGGATTCTAGTGGAATTGCTAAAGGGTTTGAAAAGATAT	24	56	30	42	155	99	55	71	64	19	11	11	39	34	7	13	16	28
miR-9460	ATGTCCCCAGACCGCATTGGACTGTGAATAAACCTAATCAGATTCACCAAGCCGATCTGTTGTTTATGCCCCACGATAACGTAGGCAGAAAAACCTACCGTTACGCGTTGGTCGTGATTGATATTGCCTCGAGATATAAAGATGCAGAAGCACTGACCACCAAGGATTCGAGTGGAATTGCTAAAGGGTTTGAAAAGATAT	25	57	30	42	156	101	52	71	66	18	11	10	38	37	8	13	15	27
miR-9460	ATGTCCCCAGACCGCATTGGACTGTGAATAAACCTAATCAGATTCACCAAGCCGATCTGTTGTTTATGCCCCACGATAACGTAGGCAGAAAAACCTACCGTTACGCGTTGGTCGTGATTGATATTGCCTCGAGATATAAAGATGCAGAAGCACTGGCTACCAAGGATTCGAGTGGAATTGCTAAAGGGTTCGAAAAGATAT	25	59	31	42	163	108	61	79	68	25	14	14	46	38	15	16	17	31
miR-9460	CAGACCGCATTGGACTGTGAATAAACCTAATCAGATTCACCAAGCCGATCTGTTGTTTATGCCCCACGATAACGTAGGCAGAAAAACCTACCGTTACGCGTTGGTCGTGATTGATATTGCCTCGAGATATAAAGATGCAGAAGCACTGACTACCAAGGATTCTAGTGGAATTGCTAAAGGGTTTGAAAAGATATACTCCAG	24	56	30	42	155	99	55	71	64	17	11	11	40	35	7	13	16	28
miR-9460	CAGACCGCATTGGACTGTGAATAAACCTAATCAGATTCACCAAGCCGATCTGTTGTTTATGCCCCACGATAACGTAGGCAGAAAAACCTACCGTTACGCGTTGGTCGTGATTGATATTGCCTCGAGATATAAAGATGCAGAAGCACTGACTACCAAGGACTCGAGTGGAATTGCTAAAGGGTTTGAAAAGATATACTCCAG	25	56	30	42	156	98	54	71	65	17	11	11	41	35	7	14	16	27
miR-9460	CAGACCGCATTGGACTGTGAATAAACCTAATCAGATTCACCAAGCCGATCTGTTGTTTATGCCCCACGATAACGTAGGCAGAAAAACCTACCGTTACGCGTTGGTCGTGATTGATATTGCCTCGAGATATAAAGATGCAGAAGCACTGGCTACCAAGGATTCGAGTGGAATTGCTAAAGGGTTCGAAAAGATATACTCCAG	25	59	31	42	163	108	61	79	68	23	14	15	46	38	15	16	17	31
miR-9460	CAGACCGCATTGGACTGTGAATAAACCTAATCAGATTCACCAAGCCGATCTGTTGTTTATGCCCCACGATAACGTAGGCAGAAAAACCTACCGTTACGCGTTGGTCGTGATTGATATTGCCTCGAGATATAAAGATGCAGAAGCACTGACCACCAAGGATTCGAGTGGAATTGCTAAAGGGTTTGAAAAGATATACTCCAG	25	57	30	42	156	101	52	71	66	16	11	10	39	38	8	13	15	27
miR-9460	CTGACCGCATTGGACTGTGAATAAACCTAATCAGATTCACCAAGCCGATCTGTTGTTTATGCCCCACGATAACGTAGGCAGAAAAACCTACCGTTACGCGTTGGTCGTGATTGATATTGCCTCGAGATATAAAGATGCAGAAGCACTGACTACTAAGGATTCGAGTGCAATTGCTAAAGGGTTTGAAAAGATATACTCCAG	24	56	30	41	154	97	51	69	63	17	11	10	39	34	6	12	15	25
miR-9460	CTGTGAATAAACCTAATCAGATTCACCAAGCCGATCTGTTGTTTATGCCCCACGATAACGTAGGCAGAAAAACCTACCGTTACGCGTTGGTCGTGATTGATATTGCCTCGAGATATAAAGATGCAGAAGCACTGACTACCAAGGACTCGAGTGGAATTGCTAAAGGGTTTGAAAAGATATACTCCAGAAAACTTAAATGGC	29	63	44	45	161	103	58	72	67	18	10	16	43	35	9	16	19	25
miR-9460	CTGTGAATAAACCTAATCAGATTCACCAAGCCGATCTGTTGTTTATGCCCCACGATAACGTAGGCAGAAAAACCTACCGTTACGCGTTGGTCGTGATTGATATTGCCTCGAGATATAAAGATGCAGAAGCACTGACTACTAAGGATTCGAGTGCAATTGCTAAAGGGTTTGAAAAGATATACTCCAGAAAACTTAAATGGC	28	63	44	44	159	102	55	70	65	18	10	15	41	34	8	14	18	23
miR-9460	CTGTGAATAAACCTAATCAGATTCACCAAGCCGATCTGTTGTTTATGCCCCACGATAACGTAGGCAGAAAAACCTACCGTTACGCGTTGGTCGTGATTGATATTGCCTCGAGATATAAAGATGCAGAAGCACTGACCACCAAGGATTCGAGTGGAATTGCTAAAGGGTTTGAAAAGATATACTCCAGAAAACTTAAATGGC	29	64	44	45	161	106	56	72	68	17	10	15	41	38	10	15	18	25
miR-9460	CTGTGAATAAACCTAATCAGATTCACCAAGCCGATCTGTGGTGTATGCCCCACGATAACGTAGGCAGAAAAACCTACCGTTACGCGTTGGTCGTGATTGATATTGCCTCGAGATATAAAGATGCAGAAGCACTGACTACCAAGGATTCGGGTGGAATTGCTAAAGGGTTTGAAAAGATATACTCCAGAAAACTTAAATGGC	26	62	45	44	156	103	56	65	65	18	8	15	39	33	7	15	18	25
miR-9460	CTGTGAATAAACCTAATCAGATTCACCAAGCCGATCTGTTGTTTATGCCCCACGATAACGTAGGCAGAAAAACCTACCGTTACGCGTTGGTCGTGATTGATATTGCCTCGAGATATAAAGATGCAGAAGCACTGGCTACCAAGGATTCGAGTGGAATTGCTAAAGGGTTCGAAAAGATATACTCCAGAAAACTTAAATGGC	30	68	47	45	169	113	67	81	71	25	13	20	48	39	17	18	23	29
miR-9460	CTGTGAATAAACCTAATCAGATTCACCAAGCCGATCTGTTGTTTATGCCCCACGATAACGTAGGCAGAAAAACCTACCGTTACGCGTTGGTCGTGATTGATATTGCCTCGAGATATAAAGATGCAGAAGCACTGACTACCAAGGATTCTAGTGGAATTGCTAAAGGGTTTGAAAAGATATACTCCAGAAAACTTAAATGGC	28	63	44	45	160	104	59	72	66	18	10	16	42	35	9	15	19	26
miR-9460	TGAAGCTGAGGCTAAGAAGTGGCTTGAAAAACAGGCGTTGTGGCAGATCTACCTCCCAGCTCCAAAGTATGTCCCCAGACCGCATTGGACTGTGAATAAACCTAATCAGATTCACCAAGCCGATCTGCTGTTTATGCCCCACGATAACGTAGGCAGAAAAACCTACCGTTACGCGTTGGTCGTGATTGATATTGCCTCGAG	20	54	26	39	151	94	43	63	61	16	10	6	35	30	6	7	15	18
miR-9460	TGAAGCCGAGGCTAAGAAGTGGCTTGAAAAACAGGTGTTGTGGCAGATCTATCTCCCAGCTCCAAAGTATGTCCCCAGACCGCATTGGACTGTGAATAAACCTAATCAGATTCACCAAGCCGATCTGTTGTTTATGCCCCACGATAACGTAGGCAGAAAAACCTACCGTTACGCGTTGGTCGTGATTGATATTGCCTCGAG	28	57	33	51	158	96	49	70	66	19	9	8	42	34	5	8	15	20
miR-9460	TGAAGCCGAGGCTAAGAAGTGGCTTGAAAAACAGGCGTTGTGGCAGATCTACCTCCCAGCTCCAAAGTATGTCCCCAGACCGCATTGGACTGTGAATAAACCTAATCAGATTCACCAAGCCGATCTGTTGTTTATGCCCCACGATAACGTAGGCAGAAAAACCTACCGTTACGCGTTGGTCGTGATTGATATTGCCTCGAG	22	55	27	40	152	94	46	68	62	16	10	7	38	30	6	7	15	19
miR-9460	TGAAGCCGAGGCTAAGAAGTGGCTTGAAAAACAGGCGTTGTGGCAGATCTATCTCCCAGCTCCAAAGTATGTCCCCAGACCGCATTGGACTGTGAATAAACCTAATCAGATTCACCAAGCCGATCTGTTGTTTATGCCCCACGATAACGTAGGCAGAAAAACCTACCGTTACGCGTTGGTCGTGATTGATATTGCCTCGAG	28	57	33	51	158	96	51	70	66	19	10	8	42	34	6	8	15	20
miR-9460	TGAAGCCGAGGCTAAGAAGTGGCTTGAAAAACAGGCGTTGTGGCAGATCTATCTCCCGGCTCCAAAGTATGTCCCCAGACCGCATTGGACTGTGAATAAACCTAATCAGATTCACCAAGCCGATCTGTTGTTTATGCCCCACGATAACGTAGGCAGAAAAACCTACCGTTACGCGTTGGTCGTGATTGATATTGCCTCGAG	22	55	27	40	152	94	48	68	62	17	10	7	37	30	6	7	15	19
miR-9460	TGAAGCCGAGGCTAAGAAGTGGCTTGAAAAACAGGCGTTGTGGCAGATCTATCTCCCAGCTCCAAAGTATGTCCCCAGACCGCATTGGACTGTGAATAAACCTAATCAGATTCACCAAGCCGATCTGTTGTTTATGCCCCACGATAACGTGGGCAGAAAAACCTACCGTTACGCGTTGGTCGTGATTGATATTGCCTCTAG	28	57	33	51	156	97	50	70	66	19	8	8	42	32	4	8	14	20
miR-9460	TGAAGCTGAGGCTAAGAAGTGGCTCGAAAAACAGGCGTTGTGGCAGATCTACCTCCCAGCTCCAAAGTATGTCCCCAGACCGCATTGGACTGTGAATAAACCTAATCAGATTCACCAAGCCGATCTGCTGTTTATGCCCCACGATAACGTAGGCAGAAAAACCTACCGTTACGCGTTGGTCGTGATTGATATTGCCTCGAG	20	54	26	39	151	94	43	63	61	16	9	6	35	30	6	7	15	18
miR-9460	TGAAGCCGAGGCTAAGAAGTGGCTCGAAAAACAGGCGTTGTGGCAGATCTATCTCCCAGCTCCAAAGTATGTCCCCAGACCGCATTGGACTGTGAATAAACCTAATCAGATTCACCAAGCCGATCTGTTGTTTATGCCCCACGATAACGTAGGCAGAAAAACCTACCGTTACGCGTTGGTCGTGATTGATATTGCCTCGAG	28	57	33	51	158	96	49	70	66	19	9	8	42	34	6	8	15	20
miR-9460	TGAAGCCAAGGCTAAGAAGTGGCTTGAAAAACAGGCGTTGTGGCAGATCTATCTCCCAGCTCCAAAGTATGTCCCCAGACCGCATTGGACTGTGAATAAACCTAATCAGATTCACCAAGCCGATCTGTTGTTTATGCCCCACGATAACGTAGGCAGAAAAACCTACCGTTACGCGTTGGTCGTGATTGATATTGCCTCGAG	28	57	33	51	158	96	51	70	66	19	10	8	42	34	6	8	15	20
miR-9460	TGAAGCCGAGGCTAAGAGGTGGCTTGAAAAACAGGCGTTGTGGCAGATCTATCTCCCAGCCCCAAAGTATGTCCCCAGACCGCATTGGACTGTGAATAAACCTAATCAGATTCACCAAGCCGATCTGTTGTTTATGCCCCACGATAACGTAGGCAGAAAAACCTATCGTTACGCGTTGGTCGTGATTGATATTGCCTCGAG	25	57	30	46	157	98	50	69	65	16	10	7	40	31	7	8	18	22
miR-9460	TGAAGCCGAGGCTAAGAGGTGGCTTGAAAAACAGGCGTTGTGGCAGATCTATCTCCCAGCTCCAAAGTATGTCCCCAGACCGCATTGGACTGTGAATAAACCTAATCAGATTCACCAAGCCGATCTGTTGTTTATGCCCCACGATAACGTAGGCAGAAAAACCTACCGTTACGCGTTGGTCGTGATTGATATTGCCTCGAG	28	57	33	51	158	96	51	70	66	19	10	8	42	34	6	8	15	20
miR-9460	TGAAGTCGAGGCTAAGAGGTGGCTTGAAAAACAGGCGTTGTGGCAGATCTATCTCCCAGCTCCAAAGTATGTCCCCAGACCGCATTGGACTGTGAATAAACCTAATCAGATTCACCAAGCCGATCTGTTGTTTATGCCCCACGATAACGTAGGCAGAAAAACCTACCGTTACGCGTTGGTCGTGATTGATATTGCCTCGAG	28	57	33	51	158	96	51	70	66	19	10	8	42	34	6	8	15	20
miR-9460	TGTCCCCAGACCGCATTGGACTGTGAATAAACCTAATCAGATTCACCAAGCCGATCTGTTGTTTATGCCCCACGATAACGTAGGCAGAAAAACCTACCGTTACGCGTTGGTCGTGATTGATATTGCCTCGAGATATAAAGATGCAGAAGCACTGACCACCAAGGATTCGAGTGGAATTGCTAAAGGGTTTGAAAAGATATA	25	57	30	42	156	101	52	71	66	17	11	10	38	38	8	13	15	27
miR-9460	TGTCCCCAGACCGCATTGGACTGTGAATAAACCTAATCAGATTCACCAAGCCGATCTGTTGTTTATGCCCCACGATAACGTAGGCAGAAAAACCTACCGTTACGCGTTGGTCGTGATTGATATTGCCTCGAGATATAAAGATGCAGAAGCACTGACTACCAAGGACTCGAGTGGAATTGCTAAAGGGTTTGAAAAGATATA	25	56	30	42	156	98	54	71	65	18	11	11	40	35	7	14	16	27
miR-9460	TGTCCCCTGACCGCATTGGACTGTGAATAAACCTAATCAGATTCACCAAGCCGATCTGTTGTTTATGCCCCACGATAACGTAGGCAGAAAAACCTACCGTTACGCGTTGGTCGTGATTGATATTGCCTCGAGATATAAAGATGCAGAAGCACTGACTACTAAGGATTCGAGTGCAATTGCTAAAGGGTTTGAAAAGATATA	24	56	30	41	154	97	51	69	63	17	11	10	38	34	6	12	15	25
miR-9460	TGTCCCCAGACCGCATTGGACTGTGAATAAACCTAATCAGATTCACCAAGCCGATCTGTTGTTTATGCCCCACGATAACGTAGGCAGAAAAACCTACCGTTACGCGTTGGTCGTGATTGATATTGCCTCGAGATATAAAGATGCAGAAGCACTGACTACCAAGGATTCTAGTGGAATTGCTAAAGGGTTTGAAAAGATATA	24	56	30	42	155	99	55	71	64	18	11	11	39	35	7	13	16	28
miR-9460	TGTCCCCAGACCGCATTGGACTGTGAATAAACCTAATCAGATTCACCAAGCCGATCTGTTGTTTATGCCCCACGATAACGTAGGCAGAAAAACCTACCGTTACGCGTTGGTCGTGATTGATATTGCCTCGAGATATAAAGATGCAGAAGCACTGGCTACCAAGGATTCGAGTGGAATTGCTAAAGGGTTCGAAAAGATATA	25	59	31	42	163	108	61	79	68	24	14	15	46	38	15	16	17	31
miR-9461	AGGGTAAATGGGTATAGGGGATGTCTTATGGTGATCATCATTTTGTTTTCTTGCCATTGTATTTCCAGGTGTGAGGTTTTGTTTCTATCATGTCCAGGATGACAGTGGCAAAACCACAACCAAATGGAGCTCTTTGGGTTGTAAGTAAATGACTAATTGTAAAGACTGTTAACTAAAACTAATATGAAATTACTATAAAGT	55	45	43	47	120	104	38	72	50	26	12	23	28	51	12	16	18	37
miR-9461	AGGGTAAATGGGTATAGGGGATGTCTTATGGTGATCATCATTTTGTTTTCTTGCCATTGTATTTCCAGGTGTGAGGTTTTGTTTTTATCATATCCAGGATGACAGTGGCAAAACCACAACCAAATGGAGCTCTTTGGGTTGTAAGTAAATGACTAATTGTAAAGACTGTTAACTAAAACTAATATCAAATTACTATAAAGT	55	43	42	46	113	103	38	67	47	26	11	22	25	49	12	16	18	36
miR-9461	ATGTATAGGGTAAATGGGTATAGGGGATGTCTTATGGTGATCATCATTTTGTTTTCTTGCCATTGTATTTCCAGGTGTGAGGTTTTGTTTTTATCATATCCAGGATGACAGTGGCAAAACCACAACCAAATGGAGCTCTTTGGGTTGTAAGTAAATGACTAATTGTAAAGACTGTTAACTAAAACTAATATCAAATTACTA	55	43	42	46	113	103	38	67	47	26	11	22	25	49	12	16	18	36
miR-9461	ATGTATAGGGTAAATGGGTATAGGGGATGTCTTATGGTGATCATCATTTTGTTTTCTTGCCATTGTATTTCCAGGTGTGAGGTTTTGTTTCTATCATGTCCAGGATGACAGTGGCAAAACCACAACCAAATGGAGCTCTTTGGGTTGTAAGTAAATGACTAATTGTAAAGACTGTTAACTAAAACTAATATGAAATTACTA	55	45	43	47	120	104	38	72	50	26	12	23	28	51	12	16	18	37
miR-9461	GAATAGAAGCTTTGGGTGATTGGGTGATGTATAGGGTAAATGGGTATAGGGGATGTCTTATGGTGATCATCATTTTGTTTTCTTGCCATTGTATTTCCAGGTGTGAGGTTTTGTTTCTATCATGTCCAGGATGACAGTGGCAAAACCACAACCAAATGGAGCTCTTTGGGTTGTAAGTAAATGACTAATTGTAAAGACTGT	55	45	43	47	120	104	38	72	50	26	12	23	28	51	12	16	18	37
miR-9461	GGGTGATGTATAGGGTAAATGGGTATAGGGGATGTCTTATGGTGATCATCATTTTGTTTTCTTGCCATTGTATTTCCAGGTGTGAGGTTTTGTTTCTATCATGTCCAGGATGACAGTGGCAAAACCACAACCAAATGGAGCTCTTTGGGTTGTAAGTAAATGACTAATTGTAAAGACTGTTAACTAAAACTAATATGAAAT	55	45	43	47	120	104	38	72	50	26	12	23	28	51	12	16	18	37
miR-9461	TCATGTATAGGGTAAATGGGTATAGGGGATGTCTTATGGTGATCATCATTTTGTTTTCTTGCCATTGTATTTCCAGGTGTGAGGTTTTGTTTTTATCATATCCAGGATGACAGTGGCAAAACCACAACCAAATGGAGCTCTTTGGGTTGTAAGTAAATGACTAATTGTAAAGACTGTTAACTAAAACTAATATCAAATTAC	55	43	42	46	113	103	38	67	47	26	11	22	25	49	12	16	18	36
miR-9461	TGATGTATAGGGTAAATGGGTATAGGGGATGTCTTATGGTGATCATCATTTTGTTTTCTTGCCATTGTATTTCCAGGTGTGAGGTTTTGTTTCTATCATGTCCAGGATGACAGTGGCAAAACCACAACCAAATGGAGCTCTTTGGGTTGTAAGTAAATGACTAATTGTAAAGACTGTTAACTAAAACTAATATGAAATTAC	55	45	43	47	120	104	38	72	50	26	12	23	28	51	12	16	18	37
miR-9461	TGTATAGGGTAAATGGGTATAGGGGATGTCTTATGGTGATCATCATTTTGTTTTCTTGCCATTGTATTTCCAGGTGTGAGGTTTTGTTTCTATCATGTCCAGGATGACAGTGGCAAAACCACAACCAAATGGAGCTCTTTGGGTTGTAAGTAAATGACTAATTGTAAAGACTGTTAACTAAAACTAATATGAAATTACTAT	55	45	43	47	120	104	38	72	50	26	12	23	28	51	12	16	18	37
miR-9461	TGTATAGGGTAAATGGGTATAGGGGATGTCTTATGGTGATCATCATTTTGTTTTCTTGCCATTGTATTTCCAGGTGTGAGGTTTTGTTTTTATCATATCCAGGATGACAGTGGCAAAACCACAACCAAATGGAGCTCTTTGGGTTGTAAGTAAATGACTAATTGTAAAGACTGTTAACTAAAACTAATATCAAATTACTAT	55	43	42	46	113	103	38	67	47	26	11	22	25	49	12	16	18	36
miR-9462	AAGAAGAACCAAGAAGAGGGGAGGAGCGAAATAATGAGGAGGAGAGGTCACGCAGGCCACGAGTGTTGACAGAAGGACCCAGAGCTCGGAAGAGAGCGCGTGACCTTGTACTCACCGAGGAGCAAAGAGTGCCGAAAAGACAGACGAGCTCCGAGAACAGGTTAAGTGGTAAGCAAAGAGTCCGGGAAGGGCAAAAGGACT	38	43	45	38	73	69	57	68	61	48	23	29	43	37	42	29	42	44
miR-9462	AGAAGAACCAAGAAGAGGGGAGGAGCGAAATAATGAGGAGGAGAGGTCACGCAGGCCACGAGTGTTGACAGAAGGACCCAGAGCTCGGAAGAGAGCGCGTGACCTTGTACTCACCGAGGAGCAAAGAGTGCCGAAAAGACAGACGAGCTCCGAGAACAGGTTAAGTGGTAAGCAAAGAGTCCGGGAAGGGCAAAAGGACTC	38	43	45	38	73	69	57	68	61	48	23	29	43	37	42	29	42	44
miR-9462	AGAACCAAGAAGAGGGGAGGAGCGAAATAATGAGGAGGAGAGGTCACGCAGGCCACGAGTGTTGACAGAAGGACCCAGAGCTCGGAAGAGAGCGCGTGACCTTGTACTCACCGAGGAGCAAAGAGTGCCGAAAAGACAGACGAGCTCCGAGAACAGGTTAAGTGGTAAGCAAAGAGTCCGGGAAGGGCAAAAGGACTCGGA	38	43	45	38	73	69	57	68	61	48	23	29	43	37	42	29	42	44
miR-9462	CCAAGAAGAGGGGAGGAGCGAAATAATGAGGAGGAGAGGTCACGCAGGCCACGAGTGTTGACAGAAGGACCCAGAGCTCGGAAGAGAGCGCGTGACCTTGTACTCACCGAGGAGCAAAGAGTGCCGAAAAGACAGACGAGCTCCGAGAACAGGTTAAGTGGTAAGCAAAGAGTCCGGGAAGGGCAAAAGGACTCGGAGTAC	38	43	45	38	73	69	57	68	61	48	23	29	43	37	42	29	42	44
miR-9462	GAAGAACCAAGAAGAGGGGAGGAGCGAAATAATGAGGAGGAGAGGTCACGCAGGCCACGAGTGTTGACAGAAGGACCCAGAGCTCGGAAGAGAGCGCGTGACCTTGTACTCACCGAGGAGCAAAGAGTGCCGAAAAGACAGACGAGCTCCGAGAACAGGTTAAGTGGTAAGCAAAGAGTCCGGGAAGGGCAAAAGGACTCG	38	43	45	38	73	69	57	68	61	48	23	29	43	37	42	29	42	44
miR-9462	GTTTACTTTTTAGGTATATTTTATACCATTGGGCCAATTTTCATATCATGTCATCTCGTTTTGATCTATAATAGTTGAAGAAGAACCAAGAAGAGGGGAGGAGCGAAATAATGAGGAGGAGAGGTCACGCAGGCCACGAGTGTTGACAGAAGGACCCAGAGCTCGGAAGAGAGCGCGTGACCTTGTACTCACCGAGGAGCA	30	31	38	28	55	45	42	50	47	33	14	18	29	23	28	19	32	26
miR-9462	TATACCATTGGGCCAATTTTCATATCATGTCATCTCGTTTTGATCTATAATAGTTGAAGAAGAACCAAGAAGAGGGGAGGAGCGAAATAATGAGGAGGAGAGGTCACGCAGGCCACGAGTGTTGACAGAAGGACCCAGAGCTCGGAAGAGAGCGCGTGACCTTGTACTCACCGAGGAGCAAAGAGTGCCGAAAAGACAGAC	36	35	41	32	65	57	53	63	52	42	18	24	37	34	38	25	39	38
miR-9462	TTTACTTTTTAGGTATATTTTATACCATTGGGCCAATTTTCATATCATGTCATCTCGTTTTGATCTATAATAGTTGAAGAAGAACCAAGAAGAGGGGAGGAGCGAAATAATGAGGAGGAGAGGTCACGCAGGCCACGAGTGTTGACAGAAGGACCCAGAGCTCGGAAGAGAGCGCGTGACCTTGTACTCACCGAGGAGCAA	30	31	38	28	55	45	42	50	47	33	14	18	29	23	28	19	32	26
miR-9463	AGGCATTACTGTCTACCTCTGTGGCAGTTGTGTAATACCTGGAGGGAAATTAAATGAGTTCTGTAGACTCACTATGGTTAGCTGGTGGGCTCCATCAGAATAACTGAATCTCAGAACTACAGTTGCAGTATTTTCCTAAAAGAACGCAAATGCCAAAACCGATAGGAAAACATACCCAGTTACACCATTTTGCTTTTTTTG	1	0	0	0	1	1	5	0	4	0	1	0	4	0	45	0	4	0
miR-9463	ATTACTGTCTACCTCTGTGGCAGTTGTGTAATACCTGGAGGGAAATTAAATGAGTTCTGTAGACTCACTATGGTTAGCTGGTGGGCTCCATCAGAATAACTGAATCTCAGAACTACAGTTGCAGTATTTTCCTAAAAGAACGCAAATGCCAAAACCGATAGGAAAACATACCCAGTTACACCATTTTGCTTTTTTTGTTGT	1	0	0	0	1	1	5	0	4	0	1	0	4	0	45	0	4	0
miR-9463	CATTACTGTCTACCTCTGTGGCAGTTGTGTAATACCTGGAGGGAAATTAAATGAGTTCTGTAGACTCACTATGGTTAGCTGGTGGGCTCCATCAGAATAACTGAATCTCAGAACTACAGTTGCAGTATTTTCCTAAAAGAACGCAAATGCCAAAACCGATAGGAAAACATACCCAGTTACACCATTTTGCTTTTTTTGTTG	1	0	0	0	1	1	5	0	4	0	1	0	4	0	45	0	4	0
miR-9463	GCATTACTGTCTACCTCTGTGGCAGTTGTGTAATACCTGGAGGGAAATTAAATGAGTTCTGTAGACTCACTATGGTTAGCTGGTGGGCTCCATCAGAATAACTGAATCTCAGAACTACAGTTGCAGTATTTTCCTAAAAGAACGCAAATGCCAAAACCGATAGGAAAACATACCCAGTTACACCATTTTGCTTTTTTTGTT	1	0	0	0	1	1	5	0	4	0	1	0	4	0	45	0	4	0
miR-9463	GGCATTACTGTCTACCTCTGTGGCAGTTGTGTAATACCTGGAGGGAAATTAAATGAGTTCTGTAGACTCACTATGGTTAGCTGGTGGGCTCCATCAGAATAACTGAATCTCAGAACTACAGTTGCAGTATTTTCCTAAAAGAACGCAAATGCCAAAACCGATAGGAAAACATACCCAGTTACACCATTTTGCTTTTTTTGT	1	0	0	0	1	1	5	0	4	0	1	0	4	0	45	0	4	0
miR-9464	AAGGCCATGAACCTTCCAACTATACAGAAAGCAAGGCTAGATTCTTTGCGTCTTTACCGAAGGGTTGATCAGACGCTTCCGTTATAAGTTGAGATTCGTCTGAGAAGATTTCGACAAGAAACAGAACACACCAGGACCATTGCGTGATTTAAAATGGCGTACAGACGTAGTTTTGAATCTCTCCACAAAACTCCTCGAATA	1	4	7	4	6	3	5	7	6	7	5	6	8	11	35	31	38	27
miR-9464	GCAAGGCCATGAACCTTCCAACTATACAGAAAGCAAGGCTAGATTCTTTGCGTCTTTACCGAAGGGTTGATCAGACGCTTCCGTTATAAGTTGAGATTCGTCTGAGAAGATTTCGACAAGAAACAGAACACACCAGGACCATTGCGTGATTTAAAATGGCGTACAGACGTAGTTTTGAATCTCTCCACAAAACTCCTCGAA	1	4	7	4	6	3	5	7	6	7	5	6	8	11	35	31	38	27
miR-9465	AAGAGGCAATTGGGTGACCCATTAATCAATATGCAGGACCTGAAGGAAGTGGAGGGAAAACTGCCTAAAGATAAGATAAAATGGCACTCAAATTTTGTGATTGACTCCTATCAAAAGTGAAAGCACTAATGTGGAGGTATTTGGATGGGAGGAATTTGAGAGAGGTTATCATTGACAGTTTGCCCCAGAATTATATAAAGC	3	3	0	3	60	66	19	36	20	7	7	16	3	6	6	6	3	2
miR-9465	AAGATAAGATAAAATGGCACTCAAATTTTGTGATTGACTCCTATCAAAAGTGAAAGCACTAATGTGGAGGTATTTGGATGGGAGGAATTTGAGAGAGGTTATCATTGACAGTTTGCCCCAGAATTATATAAAGCCGACAGCAACTACGCAGGTAGACAAGATGATGTTTTTTCTTAAAGAAGTAGACAAGTCAATCACCAT	3	4	0	1	56	60	17	28	20	7	7	16	4	5	6	4	2	2
miR-9465	ATTCCCTTAGAGCTGCTGAGTGCTATAGTCAATTAAGAGGCAATTGGGTGACCCATTAATCAATATGCAGGACCTGAAGGAAGTGGAGGGAAAACTGCCTAAAGATAAGATAAAATGGCACTCAAATTTTGTGATTGACTCCTATCAAAAGTGAAAGCACTAATGTGGAGGTATTTGGATGGGAGGAATTTGAGAGAGGTT	3	3	0	3	59	64	18	36	20	7	7	16	3	5	5	5	2	2
miR-9465	CCCATGTACTAGTACCCTGGTACAGCTGATAATATGTGAGGGAGTTGCATTTGAGGGTGACCCATTAATCAATATGTGGGACCTGAAGGAAGTGGAGGGAAAACTGCCTAAAGATAAGATGGAATGGCACTCCTATCAAAAGTGAAAGCACTAATGTGGAGGTATTTGGATGGGAGGAATTTGAGAGAGGTGTAGAAAACA	3	4	2	1	62	70	16	30	20	8	7	14	5	8	4	3	2	2
miR-9465	GAAGGAAGTGGAGGGAAAACTGCCTAAAGATAAGATAAAATGGCACTCAAATTTTGTGATTGACTCCTATCAAAAGTGAAAGCACTAATGTGGAGGTATTTGGATGGGAGGAATTTGAGAGAGGTTATCATTGACAGTTTGCCCCAGAATTATATAAAGCCGACAGCAACTACGCAGGTAGACAAGATGATGTTTTTTCTT	3	4	0	2	59	61	17	27	20	7	7	16	3	5	5	4	2	3
miR-9465	GCAGGACCTGAAGGAAGTGGAGGGAAAACTGCCTAAAGATAAGATAAAATGGCACTCAAATTTTGTGATTGACTCCTATCAAAAGTGAAAGCACTAATGTGGAGGTATTTGGATGGGAGGAATTTGAGAGAGGTTATCATTGACAGTTTGCCCCAGAATTATATAAAGCCGACAGCAACTACGCAGGTAGACAAGATGATG	3	4	0	2	59	60	17	27	20	7	7	15	3	5	5	4	2	2
miR-9465	TGAAGGAAGTGGAGGGAAAACTGCCTAAAGATAAGATAAAATGGCACTCAAATTTTGTGATTGACTCCTATCAAAAGTGAAAGCACTAATGTGGAGGTATTTGGATGGGAGGAATTTGAGAGAGGTTATCATTGACAGTTTGCCCCAGAATTATATAAAGCCGACAGCAACTACGCAGGTAGACAAGATGATGTTTTTTCT	3	4	0	2	59	61	17	27	20	7	7	16	3	5	5	4	2	3
miR-9465	TGCAGGACCTGAAGGAAGTGGAGGGAAAACTGCCTAAAGATAAGATAAAATGGCACTCAAATTTTGTGATTGACTCCTATCAAAAGTGAAAGCACTAATGTGGAGGTATTTGGATGGGAGGAATTTGAGAGAGGTTATCATTGACAGTTTGCCCCAGAATTATATAAAGCCGACAGCAACTACGCAGGTAGACAAGATGAT	3	4	0	2	59	60	17	27	20	7	7	15	3	5	5	4	2	2
miR-9466	ACACTCGCCACAAGATAAAGATGATAGGTCACGAGGCTATTTTTATCCACTGCGATCTTGTGAACGCGTCCGACTCCCTCCAACAAGGAGCTCCCTCACAAGTCCTAGCAAGTGTAGAGCTTGATGAAGGAAAGATATACCTCAATCCGAGCGATCCGGTACGGGTTAGTACCACATCAGTCGGTTACGTGAGTAGTCTCC	1	4	2	0	22	18	64	58	30	56	18	46	62	74	15	18	7	6
miR-9467	CTCATCCAAGTTCATTACAGGCTGGGGTAAAAGTTTCAAGAGTTGAAACCCCACACCAACGTGGTGATTGCAGCCTTCACCACGGACGGGCTAGGGGAACGTTGTCTGTATCACGACACGGACAGCGTCATTTTCTTACACCGCCCTGGAGAGTGGAAACCGCCGCTCGGGAACTATCTAGGAGACCTGACGAGCGAGTTG	18	9	18	14	21	12	6	20	12	4	4	3	6	9	17	10	10	6
miR-9468	ACACGCTCTGTCGCTCCGTTCATTACGGCCTCCAAATTCAACTAAGCCAAAGAGGACTACTTCCAATCTACTTATCACTTTGTGTTGCTAAGATACAGGGGAAGTGTACATTGGTCGTGGAGGTCGCGGGCTTTTGGAGAACAAGTAAAGGAATCCTCATCGTATGAGGGAAGGAAATGTGGAGCGAAGTCGTCAGGAGGC	0	0	1	0	0	0	12	7	3	7	3	3	7	24	2	4	0	2
miR-9468	GAACACGCTCTGTCGCTCCGTTCATTACGGCCTCCAAATTCAACTAAGCCAAAGAGGACTACTTCCAATCTACTTATCACTTTGTGTTGCTAAGATACAGGGGAAGTGTACATTGGTCGTGGAGGTCGCGGGCTTTTGGAGAACAAGTAAAGGAATCCTCATCGTATGAGGGAAGGAAATGTGGAGCGAAGTCGTCAGGAG	0	0	1	0	0	0	12	7	3	7	3	3	7	24	2	4	0	2

## Sheet: miR star
miRNA* name	sequence of major isoform	Unfertilized eggs		Blastula		Gastrula		Early planula		Late planula		Metamorphosing		Primary polyps		Adult males		Adult female
		untreated (depth: 2613163)	oxidized (depth: 2498767)	untreated (depth: 2637518)	oxidized (depth: 2685304)	untreated (depth: 4497317)	oxidized (depth: 4504795)	untreated (depth: 4608287)	oxidized (depth: 4576031)	untreated (depth: 2417870)	oxidized (depth: 2719635)	untreated (depth: 2125638)	oxidized (depth: 2458096)	untreated (depth: 4173973)	oxidized (depth: 4232194)	untreated (depth: 2890922)	oxidized (depth: 2620395)	untreated (depth: 2745716)	oxidized (depth: 2937274)
miR-2022*	GGGATAAATCAACTGTCAAGTG	0	0	0	0	1	0	9	1	9	0	1	0	5	0	1	0	0	0
miR-9414*	CTGATTGAAGATCAAGCTGA	0	0	0	0	0	0	5	0	7	0	3	0	9	0	0	0	0	0
miR-2041b*	CAGGGGTATTTTTCTCTAACGT	0	0	0	1	12	1	6	1	6	2	1	2	4	2	2	3	2	0
miR-9428*	CGAACATAGGGACACTGTT	0	0	0	0	0	0	1	0	1	0	3	0	4	0	4	0	5	0
miR-2043*	TACCCTCAAAAGACGGTATT	0	0	0	0	3	0	9	0	2	1	4	0	7	0	7	0	2	0
miR-9429*	ACCTTCTCCATTAGACGAAA	0	0	0	0	0	0	0	0	0	0	0	0	0	0	6	0	0	0
miR-100*	ACAGGCTCGTTTCTACGGAT	2	0	4	1	0	0	0	0	0	0	1	0	0	0	64	0	68	0
miR-2023*	CTGCCACCTGTATTTCTATCA	0	2	3	0	0	0	8	0	0	0	9	0	231	2	68	1	87	3
miR-2024a*	AAAATATCGGTGTTGGGTAAAA	0	0	0	1	115	5	452	56	207	90	204	97	391	213	67	3	30	4
miR-2024e*	AGAGTATTGGCGCTGGGCAAAA	0	0	0	0	21	0	56	0	23	0	14	0	41	0	9	0	13	0
miR-2024f*	AGAATATTGGTACTGGGCAAAA	0	0	0	0	24	0	44	1	39	0	10	0	36	4	16	1	13	0
miR-2024g*	AAAATATCGGTGTTGGGTAAGA	0	0	3	2	30	12	491	146	83	310	220	263	860	891	58	43	23	35
miR-2025*	AGCTTTCGATGGCTAGAAAATC	0	0	0	0	0	0	8	0	1	1	4	3	6	4	1	0	1	1
miR-2026*	CCATCAGTGGGTATTTGAAGTT	0	0	0	0	1	0	9	1	2	0	5	0	3	0	7	0	3	0
miR-2027*	ATGCGATTTTACCAAAATGCA	10	3	10	1	28	2	140	0	82	4	83	4	183	13	301	6	484	18
miR-2028*	TAGGAACTAGCAGGAGCATTAAG	0	0	0	0	2	0	12	0	5	1	6	4	55	6	8	1	9	1
miR-2029*	TGGTAAACTATGGATTGCGCT	0	0	0	0	2	0	5	0	5	0	2	3	4	6	8	3	18	11
miR-2030*	CCTCTTTACATTGTTGTGCTGTA	0	0	0	0	3	0	17	2	6	3	2	2	6	1	11	5	6	1
miR-2032a*	CGAGGTAACTGTTGCAGCAT	0	0	0	0	0	0	0	0	0	0	0	0	4	0	21	1	1	0
miR-2032b*	CGAGGTAACTGTTGCAGCAT	0	0	0	0	0	0	0	0	0	0	0	0	4	0	21	1	1	0
miR-2035*	CCTTGTGACAGCCCATGGGA	0	0	1	0	44	1	24	2	33	1	10	0	12	1	31	0	14	0
miR-2042*	TTATAAATCATCCTTGCACTA	0	0	0	0	0	0	0	0	0	0	1	0	1	0	14	6	4	2
miR-2051*	AAATAGAAAAGCTTCCGGTTTT	0	0	0	1	0	0	0	0	0	0	0	1	0	0	8	5	0	0

## Sheet: Spike-ins
Sample name	Library depth (genome-matching reads, not matching abundant ncRNAs)	Oligo pair #1				Oligo pair #2				Oligo pair #3				Oligo pair #4
		Oligo sequence	Read number	Depth-normalized read number (ppm)	Amount introduced (fmol per μg total RNA)	Oligo sequence	Read number	Depth-normalized read number (ppm)	Amount introduced (fmol per μg total RNA)	Oligo sequence	Read number	Depth-normalized read number (ppm)	Amount introduced (fmol per μg total RNA)	Oligo sequence	Read number	Depth-normalized read number (ppm)	Amount introduced (fmol per μg total RNA)
Unfertilized eggs, untreated	2613163	CGCGUACGCGAGACGUCCCUAGm	2956	1131.2	0.492	CGCGUACGCGAAUGGAUAGAUCm	6506	2489.7	0.492	CGCGUACGCGACCGUGCCGAUA	3767	1441.5	0.492	CGCGUACGCGACUCGGUGGGUU	29	11.1	0
Unfertilized eggs, oxidized	2498767	CGCGUACGCGAGACGUCCCUAGm	2504	1002.1	0.492	CGCGUACGCGAAUGGAUAGAUCm	7560	3025.5	0.492	CGCGUACGCGACCGUGCCGAUA	6	2.4	0.492	CGCGUACGCGACUCGGUGGGUU	8	3.2	0
Blastula, untreated	2637518	CGCGUACGCGAGACGUCCCUAG	130	49.3	0	CGCGUACGCGAAUGGAUAGAUCm	9429	3575	0.495	CGCGUACGCGACCGUGCCGAUAm	771	292.3	0.495	CGCGUACGCGACUCGGUGGGUU	12999	4928.5	0.495
Blastula, oxidized	2685304	CGCGUACGCGAGACGUCCCUAG	15	5.6	0	CGCGUACGCGAAUGGAUAGAUCm	7917	2948.3	0.495	CGCGUACGCGACCGUGCCGAUAm	670	249.5	0.495	CGCGUACGCGACUCGGUGGGUU	35	13	0.495
Males, untreated	2890922	CGCGUACGCGAGACGUCCCUAG	8942	3093.1	0.416	CGCGUACGCGAAUGGAUAGAUC	372	128.7	0	CGCGUACGCGACCGUGCCGAUAm	573	198.2	0.416	CGCGUACGCGACUCGGUGGGUUm	2254	779.7	0.416
Males, oxidized	2620395	CGCGUACGCGAGACGUCCCUAG	101	38.5	0.416	CGCGUACGCGAAUGGAUAGAUC	136	51.9	0	CGCGUACGCGACCGUGCCGAUAm	531	202.6	0.416	CGCGUACGCGACUCGGUGGGUUm	2690	1026.6	0.416
Females, untreated	2745716	CGCGUACGCGAGACGUCCCUAGm	5257	1914.6	0.425	CGCGUACGCGAAUGGAUAGAUC	19974	7274.6	0.425	CGCGUACGCGACCGUGCCGAUA	5	1.8	0	CGCGUACGCGACUCGGUGGGUUm	3695	1345.7	0.425
Females, oxidized	2937274	CGCGUACGCGAGACGUCCCUAGm	5198	1769.7	0.425	CGCGUACGCGAAUGGAUAGAUC	19	6.5	0.425	CGCGUACGCGACCGUGCCGAUA	5	1.7	0	CGCGUACGCGACUCGGUGGGUUm	3666	1248.1	0.425
Legend :
In oligo sequences, 'Nm' indicates a 2´-O-methylated nucleotide.
Red cells: oligos spiked in the methylated form.
Blue cells: oligos spiked in the non-methylated form.
White cells: No spiking.
