# Supplementary material for: Cnidarian microRNAs frequently regulate targets by cleavage
Source: HighWire-hosted journal article supplement (doi:10.1101/gr.162503.113), 2014-03-18
Supplement: Table_S3.xlsx [file Table_S3.xlsx]

## Sheet: degradomeReadCounts_noMismatche
mirName	targetId	targetMatchStart	targetMatchEnd	cleavagePos	degradeomeReadCount	countReplicate1	countReplicate2	inBothReplicates	targetSeq	alignment	miRNA seq	alnScoreWeightedMismatch	alnScoreMatch	geneSize
miR-2051	NVE4448	937	958	948	332	156	176	Yes	GACAUCGAGGAAGACUCCGUUG	::::. :: .::::::::: :.	CUGUGUCU-UUUCUGAGGCCAU	6	17.5	1855
miR-2025	NVE12346	818	839	829	173	82	91	Yes	GCGACCUCCGCGAGCUAAAAAA	.:.:: :::::: :::::::::	UGUUGAAGGCGCCCGAUUUUUU	4	19	982
miR-9426	NVE6645	7311	7332	7322	165	83	82	Yes	CUUUCAAAGCCCUCAAACUCUU	::::::::::::::::::::::	GAAAGUUUCGGGAGUUUGAGAA	0	22	12307
miR-2024e	NVE21566	1350	1371	1361	109	68	41	Yes	UCAGAAUAUUGGAGUUGUGCAG	:::::::::::: . ::::::.	AGUCUUAUAACCAUUACACGUU	5.5	19	7029
miR-2024f	NVE15093	1224	1243	1233	96	56	40	Yes	AGAACAUUGGAGUUGUGCAG	:::::::::: : ::::::.	UCUUGUAACCACUACACGUU	4.5	17.5	1467
miR-2022	NVE21802	2196	2218	2208	83	51	32	Yes	GCGGAGGAAAAGAAACUAACAAG	:::: . ::::: ::::: :::.	CGCCCUGUUUUCGUUGAUCGUUU	7	18	2718
miR-2030	NVE19315	1214	1234	1224	75	28	47	Yes	GUCUCUUACAAUGUUACGCUA	.::::::::::::::: ::::	UAGAGAAUGUUACAAUACGAU	2.5	19.5	34045
miR-2022	NVE13626	1141	1163	1153	59	36	23	Yes	GCGGAGGAAAAGAAACUAACAAG	:::: . ::::: ::::: :::.	CGCCCUGUUUUCGUUGAUCGUUU	7	18	1358
miR-2024e	NVE21566	750	771	761	43	16	27	Yes	UCAGAACAUUGGAGUUGUGCAG	:::::: ::::: . ::::::.	AGUCUUAUAACCAUUACACGUU	6.5	18	7029
miR-2026	NVE21279	1387	1407	1397	40	20	20	Yes	UCUAUCAGUGGACAUUUGAAA	::.::::::.:::::::::::	AGGUAGUCAUCUGUAAACUUU	1.5	20	1584
miR-2023	NVE21766	2298	2319	2309	36	27	9	Yes	UCUUACCACAUGUACUUCUUG	.:.:::::: ::::::::::	GGGAUGGUGAACAUGAAGAAA	4	18	2987
miR-2024g	NVE5582	617	639	629	32	23	9	Yes	UAACAAUAUCGGUGUUGUGUUC	: :::::::::::..::::::	AGUGUUAUAGCCAUGACACAAU	4	19	1196
miR-9446	NVE9571	1364	1385	1375	31	11	20	Yes	AAAAGAUGAUCAUGAGAAGAAA	: : ::.:: :::.::::.:::	UGUACUGCU-GUAUUCUUUUUU	6.5	17.5	1738
miR-9419	NVE23143	976	997	987	27	15	12	Yes	CCAAUCCAAGCGUCUUCAAGGA	::: :::::.::::::::.:	UUUUAAGUUCGUAGAAGUUCUU	5	18	1099
miR-2024f	NVE21566	2432	2451	2441	26	19	7	Yes	AGAAUAUUGGUGGGGUGCAG	::::.:::::::. :::::.	UCUUGUAACCACUACACGUU	4	17.5	7029
miR-2024g	NVE4923	260	281	271	23	12	11	Yes	UAACAAUAUCGGUGCUGUGUUG	: :::::::::::.:::::::.	AGUGUUAUAGCCAUGACACAAU	2.5	20	2420
miR-2024e	NVE7149	1231	1253	1243	23	15	8	Yes	GUAUGAAUAUUGGUGGGGUGCAG	.: ::::::::::.. :::::.	AGU-CUUAUAACCAUUACACGUU	7	18	5046
miR-9446	NVE3357	94	115	105	22	7	15	Yes	GCAUAAUGACAAAAAGAAAGAA	.::: :.::: : ::::::.::	UGUACUGCUG-UAUUCUUUUUU	7	17.5	2257
miR-2024e	NVE7149	1711	1733	1723	22	10	12	Yes	GUAUGAAUAUUGGUGGGGUGCAG	.: ::::::::::.. :::::.	AGU-CUUAUAACCAUUACACGUU	7	18	5046
miR-2024e	NVE7149	1352	1373	1363	20	11	9	Yes	UCUGAAUAUUGGUGGGGUGCAG	:: ::::::::::.. :::::.	AGUCUUAUAACCAUUACACGUU	5.5	18.5	5046
miR-2024f	NVE11467	109	128	118	18	13	5	Yes	AGAAUAUUGGUGGGGUGCAG	::::.:::::::. :::::.	UCUUGUAACCACUACACGUU	4	17.5	2424
miR-2026	NVE18201	2011	2032	2022	18	8	10	Yes	UCCAUCAUUAGAACAGUUGCAA	::::::: ::: ::: ::: ::	AGGUAGUCAUC-UGUAAACUUU	7	18	4247
miR-2025	NVE7677	657	678	668	18	12	6	Yes	GGAACUUGCGCGCGCUAAAAAG	. ::::: :::: ::::::::.	UGUUGAAGGCGCCCGAUUUUUU	5	18	1358
miR-9465	NVE69	228	248	238	17	11	6	Yes	CUUUUAAAAUCCU-UAAUCCAA	::.:.::: :::: . ::::::	GAGAGUUUAAGGAGGGUAGGUU	7	17.5	809
miR-2024e	NVE11467	1067	1088	1078	16	11	5	Yes	UCAGAACAUUGGAGUUGUGCAG	:::::: ::::: . ::::::.	AGUCUUAUAACCAUUACACGUU	6.5	18	2424
miR-2024e	NVE11467	707	728	718	16	11	5	Yes	UCAGAACAUUGGAGUUGUGCAG	:::::: ::::: . ::::::.	AGUCUUAUAACCAUUACACGUU	6.5	18	2424
miR-9415	NVE3206	6496	6517	6507	16	8	8	Yes	ACCUCCCCUGUCA-GUAUGUAA	::::::: .:::: ::: :::	UGGAGGGCGCAGUCCAUUCAUA	6.5	17.5	7205
miR-2024e	NVE7149	1592	1613	1603	16	10	6	Yes	UCUGAAUAUUGGUGGGGUGCAG	:: ::::::::::.. :::::.	AGUCUUAUAACCAUUACACGUU	5.5	18.5	5046
miR-2025	NVE8472	3007	3028	3018	15	9	6	Yes	GGAACUUGCGCGCGCUAAAAAG	. ::::: :::: ::::::::.	UGUUGAAGGCGCCCGAUUUUUU	5	18	3728
miR-9427	NVE17752	892	916	906	14	8	6	Yes	UCAACUCCGACCUCACUCGUCUCA	:: ::: :.: :::::: :::::	AG-UGAAGUUAGAGUGACCAGAGA	6.5	18.5	1440
miR-9425	NVE18711	554	575	565	14	9	5	Yes	UCAAGCUAUUUUAGGUGAUUUU	:: ::::::::: :::: :.::	AG-UCGAUAAAACCCACAAGAA	6	18.5	724
miR-2024e	NVE21566	510	531	521	14	9	5	Yes	UCAGAACAUUGGUGGGGUGCAG	:::::: ::::::.. :::::.	AGUCUUAUAACCAUUACACGUU	5.5	18.5	7029
miR-2024f	NVE21566	872	891	881	14	11	3	Yes	AGAAUAUUGGUGGGGUGCAG	::::.:::::::. :::::.	UCUUGUAACCACUACACGUU	4	17.5	7029
miR-9464	NVE16364	2054	2078	2068	12	9	3	Yes	AUUAGUGGGCGAAAUCUUCUCAAGA	:: : : :::::::::::: :::	CAAAGAACAGCUUUAGAAGAG-UCU	7	19	2301
miR-2024e	NVE21967	177	199	189	11	5	6	Yes	UCACAAUACCGGAUAAUGUGGAA	::: :::: :: ::::::: ::	AGUCUUAUAACC-AUUACACGUU	7	18	868
miR-9423	NVE13734	224	247	237	10	6	4	Yes	GAGAGGUAUUUUCAGACGGACUAU	:: .:: :.:::: ::::::.::	GUCAUCA-AGAAGUAUGCCUGGUA	7	18.5	583
miR-9421	NVE13902	1139	1161	1151	10	4	6	Yes	AUCAUUAAUGACAGAUAUGACAG	: :::::::: ::::::.: ::.	UCGUAAUUACCGUCUAUGC-GUU	6.5	19	2179
miR-2024f	NVE15093	984	1003	993	10	4	6	Yes	AGAACAUUGGAGUUGUGCAG	:::::::::: : ::::::.	UCUUGUAACCACUACACGUU	4.5	17.5	1467
miR-9444	NVE21419	1677	1698	1688	10	3	7	Yes	AGAGGGUUGGCGGUUGUUCGUA	::::::::::::::::::::::	UCUCCCAACCGCCAACAAGCAU	0	22	6506
miR-9446	NVE24273	782	803	793	10	5	5	Yes	ACCUGUCAACAUCAAGAAAGAA	:: :: : :::: ::::::.::	UGUACUGCUGUA-UUCUUUUUU	6	17.5	1519
miR-9424a	NVE26192	748	772	762	10	7	3	Yes	AAUGUCGUAAAUGAGCCAACUGUC	: ::.: : :::::::::::.:	UGACGG-AGCUACUCGGUUGAUAU	6.5	18	1554
miR-2022	NVE7280	294	316	306	10	3	7	Yes	AGAGUAGAAGAGCAACUAGCAAA	: : ::.:::::::::::::	CGCCCUGUUUUCGUUGAUCGUUU	5.5	17.5	1053
miR-9447	NVE9541	10021	10042	10032	10	4	6	Yes	GCGGGUAGAAGAAGGUGCUUCG	::.:.. :::::::::: :::	CGUCUGACUUCUUCCACUUAGC	6.5	17.5	13557
miR-9450	NVE9925	227	247	237	10	4	6	Yes	CCCAGUGAUGUCUAAAG-UUCU	:::: :::: ::::::: :::	GGGUGACUAAAGAUUUCUUAGA	7	18	2273
miR-2022	NVE10311	614	636	626	9	3	6	Yes	AGAGUAGAAGAGCAACUAGCAAA	: : ::.:::::::::::::	CGCCCUGUUUUCGUUGAUCGUUU	5.5	17.5	1050
miR-2024g	NVE13647	110	132	122	9	5	4	Yes	UAACAAUAUAGGUGCUGUGUUC	: ::::::: :::.:::::::	AGUGUUAUAGCCAUGACACAAU	5	18.5	2559
miR-2024g	NVE14675	450	472	462	9	5	4	Yes	UAACAAUAUCGGUGCUGUGUUC	: :::::::::::.:::::::	AGUGUUAUAGCCAUGACACAAU	3	19.5	2413
miR-2024g	NVE15628	248	270	260	9	8	1	Yes	UAACAACAUCGGUGCUGUGUUC	: :::: ::::::.:::::::	AGUGUUAUAGCCAUGACACAAU	4	18.5	575
miR-2024e	NVE21566	1590	1611	1601	9	6	3	Yes	UCAGAAAAUUGGAGUUGUGCAG	:::::: ::::: . ::::::.	AGUCUUAUAACCAUUACACGUU	6.5	18	7029
miR-2024a	NVE5582	497	519	509	9	6	3	Yes	UAACAAUAUAGGUGCUGUGUAC	: ::::::: :::.:::::::	AGUGUUAUAGCCAUGACACAUU	5	18.5	1196
miR-9447	NVE10030	1301	1322	1312	8	7	1	Yes	GCGUAGCGAAGAAGAUGAAUCG	::. : ::::::: :::::::	CGUCUGACUUCUUCCACUUAGC	5.5	17.5	1418
miR-9446	NVE15227	647	666	656	8	2	6	Yes	AUACG-CGCCAUAAGAAAAAA	:.: : :: ::::::::::::	UGUACUGCUGUAUUCUUUUUU	4.5	17.5	3594
miR-2030	NVE16364	2153	2174	2164	8	2	6	Yes	AUAUUUUCCAAUGUUACUGUUG	:: :.:: :::::::: ::.:.	UAGAGAAUGUUACAAU-ACGAU	6	17.5	2301
miR-2024e	NVE21566	2190	2211	2201	8	4	4	Yes	UCAGAAAAUUGGAGUUGUGCAG	:::::: ::::: . ::::::.	AGUCUUAUAACCAUUACACGUU	6.5	18	7029
miR-2024g	NVE662	128	150	140	8	5	3	Yes	UUCCAAUAUCGGUGCUGUGUUC	:. ::::::::::.:::::::	AGUGUUAUAGCCAUGACACAAU	3.5	19	2841
miR-2050	NVE10642	615	635	625	7	4	3	Yes	AACCAGG-CUUAGCAAUCAGAU	::::::. : .::::::::.::	UUGGUCUAGUGUCGUUAGUUUA	5.5	18.5	1207
miR-2024g	NVE14676	562	584	574	7	4	3	Yes	UAACAACAUCGGUGCUGUGUUC	: :::: ::::::.:::::::	AGUGUUAUAGCCAUGACACAAU	4	18.5	1053
miR-9447	NVE17350	2372	2393	2383	7	4	3	Yes	GCAGACGAAGGAAUUUGAAUCG	:::::: :.::: :::::::	CGUCUGACUUCUUCCACUUAGC	7	17.5	2797
miR-2025	NVE6320	2007	2027	2017	7	4	3	Yes	GUAAC-ACCGCGGGCUAAAGAA	..::: ::::::::::::.::	UGUUGAAGGCGCCCGAUUUUUU	4	18.5	2295
miR-2024g	NVE662	1968	1990	1980	7	5	2	Yes	UUACAAUAUCGGUGAUGUGUUC	:.:::::::::::. ::::::	AGUGUUAUAGCCAUGACACAAU	4.5	19	2841
miR-9426	NVE947	748	769	759	7	5	2	Yes	CUUUCAAAGCCCCCAAACUCUU	:::::::::::: :::::::::	GAAAGUUUCGGGAGUUUGAGAA	2	21	4844
miR-9434	NVE9870	938	960	950	7	4	3	Yes	CAGAAGCCAGAAGUCCUGUCAGA	:::::::::::: ::::::::::	GUCUUCGGUCUUAAGGACAGUCU	2	22	2005
miR-2023	NVE3625	1383	1402	1392	6	4	2	Yes	CCCUGUCACUUGU-UUUCUGU	::::..::::::: .:::: :	GGGAUGGUGAACAUGAAGAAA	6	17.5	1811
miR-2024g	NVE579	1370	1392	1382	6	5	1	Yes	UAACAAUAUCGGUGCCGUGUUC	: :::::::::::.: :::::	AGUGUUAUAGCCAUGACACAAU	5	18.5	2355
miR-9436	NVE13040	2264	2283	2273	5	3	2	Yes	ACAUACAGA-AUCUGCCUCAA	:::::::.: :: ::: ::::	UGUAUGUUUGUAAACGCAGUU	6.5	17.5	3214
miR-2022	NVE16498	4067	4089	4079	5	4	1	Yes	CACCGACAAAAGCAACUAGCAAA	:::::::::::::::::::	CGCCCUGUUUUCGUUGAUCGUUU	4	19	7888
miR-2050	NVE16837	1484	1505	1495	5	2	3	Yes	AAUCAGAUCACAGU-AUCAAAA	::.::::::::::. ::::::	UUGGUCUAGUGUCGUUAGUUUA	4.5	19	7092
miR-9437	NVE18204	79	100	90	5	1	4	Yes	GCACCAUG-CAGAUUUUCGUCAA	: ::: :. ::::::.:::: ::	CUUGGCAUAGUCUAAGAGCAAUU	6.5	18	2118
miR-9446	NVE18715	878	900	890	5	4	1	Yes	CUAUGGACGAUAUAAGAAGAAU	.:: :::::.:::::::.::	UGUA-CUGCUGUAUUCUUUUUU	5.5	17.5	991
miR-2024g	NVE1960	972	994	984	5	4	1	Yes	UAACAAUAUCGGUGCUGUGUUC	: :::::::::::.:::::::	AGUGUUAUAGCCAUGACACAAU	3	19.5	3278
miR-9417	NVE20769	5473	5496	5486	5	3	2	Yes	AUGCCUUGCGCGAUGCGUUCUUU	: .::.::: ::::.::::::.	UCUGGGACG-GCUAUGCAAGAGU	6	18	5713
miR-2024g	NVE22807	547	569	559	5	2	3	Yes	UAACAAUAUAGGUGCUGUGUUC	: ::::::: :::.:::::::	AGUGUUAUAGCCAUGACACAAU	5	18.5	1230
miR-9452	NVE5882	3129	3150	3140	5	1	4	Yes	UUUCUUGGAUGUUUCA-CUAGCA	::: ::: : ..:::: ::::::	AAACAACGUUUGAAGUAGAUCGU	7	18	3500
miR-9434	NVE9794	2292	2314	2304	5	1	4	Yes	CAGGAGCCGGAUUUCUUCUCAGA	:::.::::.:: :::.: :::::	GUCUUCGGUCUUAAGGACAGUCU	6	19.5	2568
miR-9418	NVE12493	454	477	467	5	0	5	No	GAGUCAGUUUAUGUUGAUGCAAUU	::. :::::. ..:::::::: ::	CUUUGUCAAG-GUAACUACGUGAA	7	19	1277
miR-9437	NVE17668	72	93	83	5	5	0	No	GAGCUGAAU-AGACUCGCGUUAA	::.:.: :: ::: :: ::::::	CUUGGCAUAGUCUAAGAGCAAUU	7	18	922
miR-2024g	NVE1961	1254	1277	1267	5	5	0	No	AUAUCAACAUCGGUGCUGUGUUC	.: ::: ::::::.:::::::	AGU-GUUAUAGCCAUGACACAAU	5.5	18	2423
miR-2024g	NVE11139	1356	1378	1368	4	3	1	Yes	UUCCAACAUCGGUGCUGUGUUC	:. ::: ::::::.:::::::	AGUGUUAUAGCCAUGACACAAU	4.5	18	1528
miR-9417	NVE19	1101	1123	1113	4	2	2	Yes	AGGACUUGACCGAGACGUUCGCA	::. :.:: :::: :::::: ::	UCUGGGAC-GGCUAUGCAAGAGU	7	18	1894
miR-2030	NVE19315	24074	24094	24084	4	3	1	Yes	AUCUCUUACAAUGUUACGCUA	:::::::::::::::: ::::	UAGAGAAUGUUACAAUACGAU	2	20	34045
miR-9419	NVE22308	585	606	596	4	1	3	Yes	GAAAUUC-AGCGUCUUCAAGAC	.:::::: :::.:::::::::	UUUUAAGUUCGUAGAAGUUCUU	3.5	19	733
miR-2024e	NVE7149	1112	1133	1123	4	2	2	Yes	UCUGAACAUUGGUGGGGUGCAG	:: ::: ::::::.. :::::.	AGUCUUAUAACCAUUACACGUU	6.5	17.5	5046
miR-2024e	NVE7149	1832	1853	1843	4	3	1	Yes	UCUGAACAUUGGUGGGGUGCAG	:: ::: ::::::.. :::::.	AGUCUUAUAACCAUUACACGUU	6.5	17.5	5046
miR-9450	NVE8084	1188	1209	1199	4	3	1	Yes	CACAUUAAUUUAUAAAGAAUAU	: ::.: :::: :::::::: :	GGGUGACUAAAGAUUUCUUAGA	6.5	17.5	1509
miR-9424b	NVE8800	786	805	795	4	3	1	Yes	UGCCUCGGUAGACCA-CAUUA	:::::::.::.:::: : :::	ACGGAGCUAUUUGGUCGAAAU	5.5	18	1330
miR-2022	NVE23326	20	42	32	4	0	4	No	UCAGGAAAGAAGAAAUUAGCAAA	: ::: :.::: ::.:::::::	CGCCCUGUUUUCGUUGAUCGUUU	6.5	18	1575
miR-2024g	NVE580	1310	1332	1322	4	4	0	No	UAACAAUAUAGGUGCUGUGUUC	: ::::::: :::.:::::::	AGUGUUAUAGCCAUGACACAAU	5	18.5	1546
miR-9426	NVE8079	718	742	732	4	4	0	No	CUUGCGCAGGCCCUCAAACUUGA	::: :. :.:::::::::::.	GAAAGU-UUCGGGAGUUUGAGAA	7	17.5	1432
miR-9419	NVE11101	1852	1872	1862	3	2	1	Yes	AAGACUCAUGCAU-UUCAAGGA	::.: ::: :::: ::::::.:	UUUUAAGUUCGUAGAAGUUCUU	5.5	18	2058
miR-2024g	NVE11134	594	616	606	3	1	2	Yes	UAACAACAUCGGUGCUGUGUUC	: :::: ::::::.:::::::	AGUGUUAUAGCCAUGACACAAU	4	18.5	1095
miR-9446	NVE13123	1716	1736	1726	3	2	1	Yes	ACAUGAAGAGAAAAGGAAAAA	:::::: :: : :::.:::::	UGUACUGCUGUAUUCUUUUUU	6	17.5	4767
miR-9419	NVE13339	307	327	317	3	1	2	Yes	AAAAUUGAAGUA-CUUUAUGAA	:::::: :::.: :::.: :::	UUUUAAGUUCGUAGAAGUUCUU	7	18	3424
miR-2022	NVE16448	2919	2941	2931	3	2	1	Yes	AGGGGCCAACAGCAACUAGCAAA	::: ::: :::::::::::::	CGCCCUGUUUUCGUUGAUCGUUU	4	19	3678
miR-9445	NVE17350	1963	1983	1973	3	1	2	Yes	AGGAAAAAUGAGCGACACAGA	:.: :::.::::::::::::	UUC-AUUUGCUCGCUGUGUCU	3.5	18	2797
miR-9424b	NVE22160	680	701	691	3	1	2	Yes	UGCCUCAGCUAAGGAAGCUUUA	:::::: : :::. :::::::	ACGGAG-CUAUUUGGUCGAAAU	7	17.5	913
miR-9436	NVE25406	479	498	488	3	1	2	Yes	AUAUACAAAGAUUU-UGUCAA	:.::::::: :::: .:::::	UGUAUGUUUGUAAACGCAGUU	5.5	18	872
miR-2026	NVE26175	844	865	855	3	2	1	Yes	UUCAUCCUUUGAACAUUUGAAA	:.:::: : : ::::::::::	AGGUAGUCAUC-UGUAAACUUU	6.5	17.5	1183
miR-9468	NVE2777	1806	1829	1819	3	1	2	Yes	UCUGCACGGCCAAUGUUCAUUGUC	.:: ::::.::::::: ::.: ::	GGAGGUGCUGGUUACAUGUGA-AG	7	19.5	2028
miR-2030	NVE3835	1089	1109	1099	3	2	1	Yes	AUGUCUUUCAGUGUUAUGCUA	:: :::: ::.::::::::::	UAGAGAAUGUUACAAUACGAU	3	18.5	1309
miR-9449	NVE6440	1445	1465	1455	3	2	1	Yes	ACGAAGACUG-UUGACGAGAUA	:::: :: :: ::.: ::::::	UGCUACUUACAAAUUCCUCUAU	7	17.5	3979
miR-2024g	NVE662	1488	1510	1500	3	2	1	Yes	UUACAAUAUCGGUGAUGUGUUC	:.:::::::::::. ::::::	AGUGUUAUAGCCAUGACACAAU	4.5	19	2841
miR-2024e	NVE7149	632	653	643	3	1	2	Yes	UCAGAGCAUUGGUCUUGUGCAG	:::::. :::::: ::::::.	AGUCUUAUAACCAUUACACGUU	6	18	5046
miR-9432	NVE14915	960	980	970	3	3	0	No	CCU-CAUGUCCUUUGGAUAUUC	::: :: .:::::.:: :::::	GGAGGUUUAGGAAGCCAAUAAG	5.5	18	1236
miR-2024g	NVE16268	856	878	868	3	3	0	No	UAGCAACAUCGGUGCUGUGUUC	: .::: ::::::.:::::::	AGUGUUAUAGCCAUGACACAAU	4.5	18	2945
miR-9464	NVE17500	2610	2633	2623	3	3	0	No	GUUUCUUGUCGAUAUCUUCUCAGA	:::::::::::: :::::::::::	CAAAGAACAGCUUUAGAAGAGUCU	2	23	4780
miR-2051	NVE19017	1476	1495	1485	3	3	0	No	GACACAGCGAAGAC-CCGGUA	::::::: .::::: ::::::	CUGUGUCUUUUCUGAGGCCAU	4	18.5	2513
miR-9446	NVE23271	1153	1174	1164	3	3	0	No	AUAUGAAGAGCAAAAGAAGAAA	:.:::: :: :: :::::.:::	UGUACUGCU-GUAUUCUUUUUU	6.5	18	1929
miR-2051	NVE561	312	333	323	3	0	3	No	UACGACAAAAAAGACUUCGUUA	:: ::: ::::::::.:: ::	CUG-UGUCUUUUCUGAGGCCAU	6	17.5	1366
miR-9468	NVE8152	2800	2823	2813	3	0	3	No	GUUUCACG-UCAAUGUACACUCA	.:.:::: .:::::::::::	GGAGGUGCUGGUUACAUGUGAAG	6.5	17.5	3020
miR-9468	NVE8852	690	711	701	3	3	0	No	GCGUGACGGCCAAUGU-CACUUC	: . :::.::::::: ::::::	GGAGGUGCUGGUUACAUGUGAAG	6	18	1117
miR-9458	NVE9157	1953	1973	1963	3	3	0	No	CCCCUUCAAUUUUUG-UUGCGU	::: .:: ::.:::: :.::::	GGGAGAGGUAGAAACGAGCGCA	6.5	17.5	2346
miR-2024e	NVE10153	2948	2968	2958	2	1	1	Yes	UAAGAAUGUUGCUAAUG-GCGA	: :::::.::: ::::: ::.:	AGUCUUAUAACCAUUACACGUU	6.5	18	3232
miR-9461	NVE11021	2802	2824	2814	2	1	1	Yes	UGGAUUUUGCCGCUGACAAUCUG	::: :::::::.::: :: .:::	ACC-AAAACGGUGACAGUAGGAC	7	19	4099
miR-2024a	NVE11137	736	758	748	2	1	1	Yes	UUAUGGUAUCGGUGCUGUGUAC	:.:...:::::::.:::::::	AGUGUUAUAGCCAUGACACAUU	4	18.5	2531
miR-2024g	NVE11139	1116	1138	1128	2	1	1	Yes	UAACAAUAUAGGUGCUGUGUUC	: ::::::: :::.:::::::	AGUGUUAUAGCCAUGACACAAU	5	18.5	1528
miR-2024g	NVE11139	1236	1258	1248	2	1	1	Yes	UUCCAACAUCGGUGCUGUGUUC	:. ::: ::::::.:::::::	AGUGUUAUAGCCAUGACACAAU	4.5	18	1528
miR-2024g	NVE16270	2562	2584	2574	2	1	1	Yes	UAACAAUAUAGGUAAUGUGUUC	: ::::::: :::: ::::::	AGUGUUAUAGCCAUGACACAAU	6	18	4783
miR-2024g	NVE1960	1212	1234	1224	2	1	1	Yes	UAACAACAUCGGUGCUGUGUUC	: :::: ::::::.:::::::	AGUGUUAUAGCCAUGACACAAU	4	18.5	3278
miR-2024g	NVE1960	1545	1567	1557	2	1	1	Yes	UUUCAAUAUCGGUGCUGUGUUC	:. ::::::::::.:::::::	AGUGUUAUAGCCAUGACACAAU	3.5	19	3278
miR-2024g	NVE1960	1665	1687	1677	2	1	1	Yes	UUCCAACAUCGGUGCUGUGUUC	:. ::: ::::::.:::::::	AGUGUUAUAGCCAUGACACAAU	4.5	18	3278
miR-9419	NVE20015	840	860	850	2	1	1	Yes	CGGAUUCAAGUAUC-UCAACAA	..:::::::.::: :::: ::	UUUUAAGUUCGUAGAAGUUCUU	7	17.5	1568
miR-9447	NVE20686	1904	1924	1914	2	1	1	Yes	GCAGA-UGAGGAAGGUGAGAAG	::::: :::.::::::::. :	CGUCUGACUUCUUCCACUUAGC	7	18	2449
miR-9424a	NVE20747	805	827	817	2	1	1	Yes	AGUGCCACCAUGGGCCAACUAUA	: :::: : :::.::::::::::	UGACGGAGCUACUCGGUUGAUAU	4	19.5	977
miR-9419	NVE20856	1153	1175	1165	2	1	1	Yes	AAGAUUCUAAAUUUCUUCAAGAA	::.:::: :: . ::::::::::	UUUUAAG-UUCGUAGAAGUUCUU	6.5	19	1404
miR-9436	NVE209	646	667	657	2	1	1	Yes	ACAUACAAGUGUUUGCAGUCUG	::::::::...::::: ::: .	UGUAUGUUUGUAAACG-CAGUU	7	18	1165
miR-9446	NVE21172	360	381	371	2	1	1	Yes	AUGUGACAGACAGGAGAGGAAA	:..:::: :::: .:::..:::	UGUACUG-CUGUAUUCUUUUUU	7	17.5	784
miR-2024e	NVE21566	2550	2571	2561	2	1	1	Yes	UCAGAACAUUGGAGCUGUGCAG	:::::: ::::: . ::::::.	AGUCUUAUAACCAUUACACGUU	6.5	18	7029
miR-2024g	NVE22807	667	689	679	2	1	1	Yes	UUCCAAGAUCGGUGCUGUGUUC	:. ::: ::::::.:::::::	AGUGUUAUAGCCAUGACACAAU	4.5	18	1230
miR-2024g	NVE22807	787	809	799	2	1	1	Yes	UAACAACAUCGGUGCUGUGUUC	: :::: ::::::.:::::::	AGUGUUAUAGCCAUGACACAAU	4	18.5	1230
miR-9419	NVE2336	2202	2225	2215	2	1	1	Yes	AAAAUUUACAGUAUCGUCAAGGU	::::::.: ::.::: :::::.	UUUUAAGU-UCGUAGAAGUUCUU	6.5	18.5	3906
miR-9434	NVE23709	230	251	241	2	1	1	Yes	CAG-AGUGGAAAUUACUGUCGGA	::: ::. . :::: :::::.::	GUCUUCGGUCUUAAGGACAGUCU	7	17.5	1192
miR-9440	NVE381	46485	46509	46499	2	1	1	Yes	CAGGCUCAUGUCCCUCGUUGAUUC	:::: : :.. : ::::::::::	GUCCAACUGU-GAGAGCAACUAAU	7	18	63031
miR-2024g	NVE579	1130	1152	1142	2	1	1	Yes	UCACAAUAUCGGUGAUGUGUUC	:::::::::::::. ::::::	AGUGUUAUAGCCAUGACACAAU	4	19.5	2355
miR-9449	NVE7297	2644	2666	2656	2	1	1	Yes	UCGAUGCCGUGCUUGAGGAGAUG	::::: .:: ::.:::::::.	UGCUAC-UUACAAAUUCCUCUAU	7	17.5	14912
miR-9434	NVE7536	983	1005	995	2	1	1	Yes	CAAAGGUCA-AAUUUCUGUCUGU	:: :.:.:: ::::.::::: :	GUCUUCGGUCUUAAGGACAGUCU	7	17.5	1624
miR-2050	NVE814	700	720	710	2	1	1	Yes	AACCCGAUGAC-CCAAUCAGAU	:::: ::: :: ::::::.::	UUGGUCUAGUGUCGUUAGUUUA	7	17.5	1040
miR-9446	NVE10150	1491	1512	1502	2	2	0	No	GGAUGAUGACGAUGAGAAAAAA	. ::::.::: ::.::::::::	UGUACUGCUG-UAUUCUUUUUU	5	18.5	3716
miR-2024a	NVE11135	999	1022	1012	2	2	0	No	UAACAAUAUCGGUGUUGUGUUC	: :::::::::::..:::::	AGUGUUAUAGCCAUGACACAUU	6	18	3326
miR-2037	NVE11364	1032	1053	1043	2	2	0	No	ACUGAAAAUUUCUUCAAUCACA	:: : ::: :::.::::::::	UGCCAUUUUCAGAGGUUAGUGU	6	17.5	1517
miR-2024e	NVE11467	827	848	838	2	0	2	No	UCAGAACAUUGGAGCUGUGCAG	:::::: ::::: . ::::::.	AGUCUUAUAACCAUUACACGUU	6.5	18	2424
miR-2050	NVE11817	3152	3175	3165	2	2	0	No	GACGAGAUCCCAGUCGAUCAAAC	.:: ::::: ::: :.::::::	UUGGUCUAGUGUC-GUUAGUUUA	6.5	18	4413
miR-2025	NVE12721	297	317	307	2	0	2	No	ACAAAAU-GGCGGGCUAAAAAG	:::: : ::::::::::::.	UGUUGAAGGCGCCCGAUUUUUU	4.5	17.5	819
miR-9449	NVE1326	2719	2741	2731	2	0	2	No	ACCGUGAUGUGUUCGAGGAGAUG	:: .::: .:::: .:::::::.	UGCUACU-UACAAAUUCCUCUAU	6.5	18	3458
miR-9447	NVE13326	62	82	72	2	2	0	No	GCAGAC-GAAGAAGACGAACCG	:::::: ::::::: ::: ::	CGUCUGACUUCUUCCACUUAGC	7	18	411
miR-9451	NVE1449	2194	2216	2206	2	2	0	No	UUCCUGUCAAUUUGAGACUCGC	:::::::::::::::::::::	AAGGACAGUUAAACUCUGAGCA	1	21	2543
miR-2024g	NVE14675	330	352	342	2	2	0	No	UAACAACAUCGGUUCUGUGUUC	: :::: :::::: :::::::	AGUGUUAUAGCCAUGACACAAU	5	18	2413
miR-2024g	NVE15629	257	279	269	2	2	0	No	UAACAACAUCGGUGCUGUGUUC	: :::: ::::::.:::::::	AGUGUUAUAGCCAUGACACAAU	4	18.5	991
miR-2022	NVE15697	87	109	99	2	0	2	No	ACGGGAGAAAAGCAACUAGCAAA	::::: ::::::::::::::::	CGCCCUGUUUUCGUUGAUCGUUU	2	21	483
miR-9454	NVE15803	640	661	651	2	2	0	No	GGUCAGAAAUGGUGACAUGGUA	:::.:::..::::: :::::	GGAGUUUUUGUCACUGGACCAU	6.5	17.5	3655
miR-2024e	NVE1627	176	196	186	2	2	0	No	UGAGAGUGAUGGUAG-GUGCAA	: :::.:. :::::. ::::::	AGUCUUAUAACCAUUACACGUU	6	17.5	2014
miR-2024g	NVE16270	1344	1366	1356	2	0	2	No	UAACAACAUCGGUGCUGUGUUC	: :::: ::::::.:::::::	AGUGUUAUAGCCAUGACACAAU	4	18.5	4783
miR-2022	NVE16498	1160	1182	1172	2	0	2	No	AUGGGAGAAAAGCAACUAGCACA	.:::: :::::::::::::: :	CGCCCUGUUUUCGUUGAUCGUUU	4.5	19.5	7888
miR-9451	NVE16586	62	84	74	2	0	2	No	UUCCUUUCAAUUUGAGACUCGA	::::: :::::::::::::::	AAGGACAGUUAAACUCUGAGCA	2	20	1431
miR-2050	NVE17084	1872	1894	1884	2	2	0	No	AACCAUAAUCAUGGUAAGCAAAU	::::: ::::..:.:: :::::	UUGGU-CUAGUGUCGUUAGUUUA	7	18.5	5554
miR-9416	NVE17881	1561	1582	1572	2	0	2	No	CACCACAGUUUAUA-UGUUCUA	::: :::.::: :: ::::::	GUGCUGUUAAACAUCACAAGAA	6.5	17.5	1927
miR-2050	NVE18272	611	631	621	2	2	0	No	AACCA-UUCACACCAAUCAACU	::::: ::::: ::::::: :	UUGGUCUAGUGUCGUUAGUUUA	6	18	1149
miR-9446	NVE18324	691	710	700	2	2	0	No	ACAUGAAGA-AUAAGAACAAG	:::::: :: ::::::: ::.	UGUACUGCUGUAUUCUUUUUU	5.5	17.5	1658
miR-2022	NVE18870	1782	1804	1794	2	2	0	No	CUGGGACAAAAGCAACAAGCAAA	.:::::::::::::: ::::::	CGCCCUGUUUUCGUUGAUCGUUU	3.5	20.5	2162
miR-9438	NVE190	1334	1354	1344	2	0	2	No	GGUCGGGACACUU-UCUAGUGU	..:::.::::::: : ::::.:	UUAGCUCUGUGAACACAUCAUA	6.5	18	1816
miR-2037	NVE19009	822	842	832	2	0	2	No	AU-GUAAAGGUUUCCAAUUGUG	:. :::::.::.::::::....	UGCCAUUUUCAGAGGUUAGUGU	6.5	17.5	2410
miR-9435	NVE191	952	973	963	2	0	2	No	UAUAAUAGAUACA-UUAACAAGG	.:.: :::::::: :: :::::.	GUGUGAUCUAUGUGAACUGUUCU	6.5	18.5	1437
miR-2024g	NVE1960	1785	1807	1797	2	2	0	No	UUUCAAAAUCGGUGCUGUGUUC	:. ::: ::::::.:::::::	AGUGUUAUAGCCAUGACACAAU	4.5	18	3278
miR-2024g	NVE1960	1905	1927	1917	2	2	0	No	UAACAACAUCGGUGCUGUGUUC	: :::: ::::::.:::::::	AGUGUUAUAGCCAUGACACAAU	4	18.5	3278
miR-9459	NVE19786	1855	1877	1867	2	0	2	No	AUUCUUGUGGUCAUUGAGCCUUU	::.::: ::::: ::::: :.::	UAGGAA-ACCAGCAACUCAGGAA	6.5	19	4297
miR-9463	NVE19831	1298	1318	1308	2	2	0	No	AAUGGUAGUUUUGAG-UUUAGU	::. ::::::.:::: ::.:::	UUGACAUCAAGACUCUAAGUCA	5.5	18.5	1709
miR-9449	NVE20201	704	724	714	2	0	2	No	GUGAUGAAAGUUU-UGGAGAUG	..:::::: :::: ::::::.	UGCUACUUACAAAUUCCUCUAU	6.5	17.5	1034
miR-9419	NVE20682	134	156	146	2	0	2	No	AAGAAUAAAGCAUACUUCAAGCG	::.: : :::::: ::::::: .	UUUUAAGUUCGUA-GAAGUUCUU	7	18	1045
miR-2024f	NVE21566	632	651	641	2	2	0	No	AGAACAUUGGUGGGGUGCAG	::::::::::::. :::::.	UCUUGUAACCACUACACGUU	3.5	18	7029
miR-9446	NVE22273	1667	1686	1676	2	0	2	No	ACAAGA-AACAUAAGAGAAAA	::: :: ::::::::.::::	UGUACUGCUGUAUUCUUUUUU	4	17.5	1974
miR-9434	NVE22381	202	223	213	2	2	0	No	CGCACGCU-GAGUUUCUGUCAGA	:. : ::. ::.::.::::::::	GUCUUCGGUCUUAAGGACAGUCU	6	18	433
miR-9437	NVE23006	159	180	170	2	0	2	No	AAGCUG-CUCAGUUUCUUGUUAA	:.:.: :::: ::::.:::::	CUUGGCAUAGUCUAAGAGCAAUU	7	17.5	7588
miR-9446	NVE23698	2820	2839	2829	2	2	0	No	ACAUGACGAU-UGAGAAAGAA	:::::::::. :.:::::.::	UGUACUGCUGUAUUCUUUUUU	5	18.5	3483
miR-2022	NVE23788	4267	4289	4279	2	0	2	No	GAUGGACAAAAGCAACAAGGAAA	: ::::::::::::: :: :::	CGCCCUGUUUUCGUUGAUCGUUU	6	19	4702
miR-9436	NVE24059	4757	4776	4766	2	0	2	No	AUAUACAAAUA-UUGCGUUCA	:.:::::::.: ::::::. :	UGUAUGUUUGUAAACGCAGUU	6.5	17.5	4920
miR-156	NVE24815	1116	1137	1127	2	0	2	No	ACAGUGCUUCUACUGUCUGUCG	:::.::::::: . ::::::.	AGUCGCGAAGAUAGAAGACAGU	7	17.5	2514
miR-2051	NVE24911	4728	4748	4738	2	0	2	No	GAUAAAGAAGGGACUCCGGUA	::.: ::::..::::::::::	CUGUGUCUUUUCUGAGGCCAU	3.5	18.5	8533
miR-9457	NVE26034	1371	1391	1381	2	2	0	No	AACACUUUUCUU-GAAUUUGCA	: :::::::::: :::: :: :	UCGUGAAAAGAAUCUUACACAU	7	18	2128
miR-2022	NVE26059	259	281	271	2	2	0	No	ACGGGAGAAGAGCAACUAGCAAA	::::: ::.:::::::::::::	CGCCCUGUUUUCGUUGAUCGUUU	2.5	20.5	14504
miR-9457	NVE2615	1064	1086	1076	2	2	0	No	AGAAUUCUUAUAUAGAGUGUGUA	:: :.: :: : ::::.::::::	UCGUGAAAAGA-AUCUUACACAU	6.5	18	1177
miR-2024g	NVE26231	854	876	866	2	2	0	No	UAACAACAUCGGUUCUGUGUUC	: :::: :::::: :::::::	AGUGUUAUAGCCAUGACACAAU	5	18	1245
miR-9436	NVE322	3538	3559	3549	2	0	2	No	AUAGGACGAACAUUUUUGUCAA	:.: ::.::::::: .:::::	UGU-AUGUUUGUAAACGCAGUU	6	17.5	3815
miR-9434	NVE358	7606	7627	7617	2	0	2	No	CAGAAGACACAAAUUCUGU-AGA	:::::: :: :: :.:::: :::	GUCUUCGGUCUUAAGGACAGUCU	7	18.5	16167
miR-9451	NVE3771	91	111	101	2	2	0	No	UUCCCGUGAGUUUGCGA-UCGU	:::: :: :.:::: :: ::::	AAGGACAGUUAAACUCUGAGCA	7	17.5	1551
miR-2024g	NVE5581	1980	2002	1992	2	2	0	No	UAACAACAUCGGUGCUGUGUUC	: :::: ::::::.:::::::	AGUGUUAUAGCCAUGACACAAU	4	18.5	4309
miR-9421	NVE6052	40	61	51	2	0	2	No	UGCAUUAUGGGCAGAUAUGUAA	:::::: ::::::::.:.::	UCGUAAUUACCGUCUAUGCGUU	5	18	1247
miR-2024g	NVE662	1248	1270	1260	2	2	0	No	UUCCAACAUCGGUGCUGUGUUC	:. ::: ::::::.:::::::	AGUGUUAUAGCCAUGACACAAU	4.5	18	2841
miR-2024g	NVE662	1368	1390	1380	2	2	0	No	UUCCAACAUCGGUGCUGUGUUC	:. ::: ::::::.:::::::	AGUGUUAUAGCCAUGACACAAU	4.5	18	2841
miR-9464	NVE8514	160	183	173	2	2	0	No	GUAUGCUGUCGAAAAUUUCUCAGA	:: : :::::::: .::::::::	CAAAGAACAGCUUUAGAAGAGUCU	6	19.5	1971
miR-9446	NVE9055	980	1001	991	2	0	2	No	ACUUGAGGAUAAGAAGAAAAAA	:: ::: ::. : :::::::::	UGUACUGCUG-UAUUCUUUUUU	7	17.5	1906
miR-9413	NVE9132	574	595	585	2	2	0	No	AUUUUUUUGCUGAUUAUUUUUA	:..:: ...:::::.:.:::::	UGGAAUGGUGACUAGUGAAAAU	5.5	17.5	874
miR-9436	NVE9236	1995	2015	2005	2	2	0	No	AUGUACAAAGAUUUACGUCAA	:..:::::: :::: ::::::	UGUAUGUUUGUAAACGCAGUU	5	18	3177
miR-2042	NVE10036	1380	1402	1392	1	0	1	No	UUGGUCCAAAGGAUGAUGUAUAA	:.:: : ::::::::: :::::	CAUCACG-UUCCUACUAAAUAUU	5.5	18.5	1659
miR-2024e	NVE10088	197	217	207	1	0	1	No	UCAGAAUAUUGG-AGUCUGCAA	:::::::::::: :.: :::::	AGUCUUAUAACCAUUACACGUU	5	19.5	3704
miR-2024g	NVE10133	619	641	631	1	1	0	No	CCACACUAUCGAGUACUGUCUUG	:::: ::::: ::::::: ::.	AGUGUUAUAGC-CAUGACACAAU	6.5	18.5	803
miR-2024e	NVE10155	527	547	537	1	0	1	No	UAAGAAUGUUGCUAAUG-GCGA	: :::::.::: ::::: ::.:	AGUCUUAUAACCAUUACACGUU	6.5	18	2018
miR-2051	NVE10221	5133	5154	5144	1	1	0	No	GCCACUGACAAAGACUUUGGUG	: ::: :: :::::::..:::.	CUGUGUCU-UUUCUGAGGCCAU	5.5	17.5	9114
miR-9412	NVE1032	1312	1334	1324	1	1	0	No	UCUUUUUCA-UCUUUAGUGUUUU	: :.::.:: :::::::..::.	ACAGAAGGUCAGAAAUCGUAAGU	7	17.5	1907
miR-9434	NVE10395	1655	1677	1667	1	0	1	No	CAGAGGCU-GAAUUAUUGUCGGU	::::.::. ::::: .::::.:	GUCUUCGGUCUUAAGGACAGUCU	7	18	2726
miR-9467	NVE10523	704	727	717	1	1	0	No	CUCGAGGGUGAUGGAAGAAAAGUG	::: ::::.: :: ::::::: ::	GAGGUCCCGCCACAUUCUUUU-AC	6.5	19.5	3878
miR-9434	NVE10620	363	384	374	1	0	1	No	CCGAAGUC-GAAUUCUUGGCAGA	: ::::.: ::::::.:: ::::	GUCUUCGGUCUUAAGGACAGUCU	5.5	19	949
miR-9432	NVE10836	8094	8116	8106	1	0	1	No	AUUCCAAAUUUUUCGGUCACUUC	.:::::::..:::::: : :::	GGAGGUUUAGGAAGCCAAU-AAG	7	18.5	8591
miR-9436	NVE10946	296	317	307	1	0	1	No	ACAGUGCAAACAUGUGUGUUGG	::: :.::::::: ::.::...	UGU-AUGUUUGUAAACGCAGUU	7	17.5	1507
miR-2024a	NVE11135	520	542	532	1	1	0	No	UAAAAAUAUCGGUGCUGUCUAC	: : :::::::::.:::: ::	AGUGUUAUAGCCAUGACACAUU	6	17.5	3326
miR-2024a	NVE11137	616	638	628	1	1	0	No	UUAUGGUAUCGGUGCUGUGUAC	:.:...:::::::.:::::::	AGUGUUAUAGCCAUGACACAUU	4	18.5	2531
miR-2025	NVE11265	2429	2449	2439	1	0	1	No	ACAACUU-GGAGAGCUAAAAAA	::::::: : : :::::::::	UGUUGAAGGCGCCCGAUUUUUU	6	18	2492
miR-9425	NVE11333	1737	1758	1748	1	1	0	No	UGAGUCUGUUUUGGGUGAUGUU	: :: ::.::::::::: : ::	AGUC-GAUAAAACCCACAAGAA	6.5	17.5	2356
miR-2037	NVE11351	1062	1083	1073	1	1	0	No	GCGCUAAAGGUCAUCAAUCGUA	.:: ::::.::: .:::::..:	UGCCAUUUUCAGAGGUUAGUGU	7	17.5	2510
miR-9424b	NVE11417	676	697	687	1	1	0	No	UAUCUCAGGUAAAUCAGCUUGA	: .::: :.::::.:::::: :	ACGGAG-CUAUUUGGUCGAAAU	6	17.5	1895
miR-9457	NVE11598	1224	1247	1237	1	0	1	No	AAUACCAUUCUUAGAACUGUGUC	: .:: ::::::::: :::::	UCGUGAAAAGAAUCUU-ACACAU	6.5	17.5	2972
miR-9432	NVE11717	699	720	710	1	1	0	No	CCGCCAGAACUUUGGGUUAUUC	:: :::.: :.:: ::::::::	GGAGGUUUAGGAAGCCAAUAAG	5.5	18	914
miR-9447	NVE11862	336	357	347	1	0	1	No	GUAGAAGCAAGAAGGUGGAUUG	:.::: :::::::::.::.:	CGUCUGACUUCUUCCACUUAGC	5.5	17.5	6937
miR-9417	NVE11940	1174	1196	1186	1	0	1	No	AGAGCCCGACCGCUACGUGCUCA	::: ::: ::: ::::: ::::	UCU-GGGACGGCUAUGCAAGAGU	7	18	2314
miR-2050	NVE11948	718	738	728	1	0	1	No	AACCAAAUCACAGU-UUCAAAU	::::: :::::::. ::::::	UUGGUCUAGUGUCGUUAGUUUA	6	18.5	1348
miR-2023	NVE12253	1137	1158	1148	1	0	1	No	CGUUUCCACCUUGUACUUAUUU	: .: ::: ::::::::: :::	GGGAUGGU-GAACAUGAAGAAA	5.5	17.5	1691
miR-2022	NVE12341	129	152	142	1	1	0	No	GUUAGACAAAAGCAGCUUGCAAU	:. ::::::::::.:: ::::	CGCCCUGUUUUCGUUGAUCGUUU	6.5	18	1714
miR-2022	NVE12356	7453	7476	7466	1	1	0	No	ACGGCAACGUAAGCAACUAGCCAA	::: ::. ::::::::::: ::	CGCC-CUGUUUUCGUUGAUCGUUU	6.5	18.5	8967
miR-2024e	NVE12513	864	886	876	1	0	1	No	CCAGGGUAUGGGUAAUGUGCAC	:::..::: :::::::::::	AGUCUUAUAACCAUUACACGUU	5	18	3433
miR-2026	NVE12675	1233	1253	1243	1	1	0	No	UCCAUAAGGACACAUUUGGAA	::::: :: : :::::::.::	AGGUAGUCAUCUGUAAACUUU	6	17.5	1730
miR-9447	NVE12867	1075	1098	1088	1	0	1	No	GUAGCGAUGGAGGAGGUGAAUUU	:.:: . ::.::.::::::::.	CGUC-UGACUUCUUCCACUUAGC	6.5	17.5	2322
miR-2024e	NVE12992	48773	48793	48783	1	1	0	No	UCAGGAUAUUGGU-ACGUACAA	::::.:::::::: : :: :::	AGUCUUAUAACCAUUACACGUU	6.5	18.5	62478
miR-2037	NVE13015	4165	4186	4176	1	1	0	No	AAGG-AAAAGUCUCAAAUCGCC	: :: ::::::::: ::::.:	UGCCAUUUUCAGAGGUUAGUGU	6	17.5	12621
miR-9465	NVE13062	2507	2527	2517	1	1	0	No	CUCUCAAAGU-CUUUCAUUUAA	:::::::: : ::..:::..::	GAGAGUUUAAGGAGGGUAGGUU	7	18	2660
miR-2022	NVE13092	364	387	377	1	1	0	No	GAGGGAUCAACAGCAACUAAGAAA	: :::: ::: :::::::: :::	CGCCCU-GUUUUCGUUGAUCGUUU	7	19	1715
miR-9424a	NVE13222	996	1020	1010	1	0	1	No	AGGGCACAUAAUGAGCCAACUAUC	: :: : . :::::::::::::	UGACG-GAGCUACUCGGUUGAUAU	6.5	17.5	1141
miR-9452	NVE13463	1600	1621	1611	1	1	0	No	UGUUUUGUAGGCUU-AUUUAGCA	: : :::.:..::: ::.:::::	AAACAACGUUUGAAGUAGAUCGU	7	18	1937
miR-9436	NVE13473	1286	1305	1295	1	0	1	No	ACAUGCAAAUA-UUGUGUCCA	::::.::::.: :::.::: :	UGUAUGUUUGUAAACGCAGUU	6.5	17.5	1513
miR-2023	NVE13550	1193	1212	1202	1	1	0	No	CCUUA-CACUUGUACUUUAUU	::.:: :::::::::::. ::	GGGAUGGUGAACAUGAAGAAA	4.5	18	1548
miR-9423	NVE13696	843	866	856	1	0	1	No	CAAAGGUUUUUCGAUAUGGACCAU	:: .:::.::: :::.:::::::	GUCAUCAAGAAG-UAUGCCUGGUA	6	19.5	2657
miR-9432	NVE13775	3963	3984	3974	1	0	1	No	CUUCUAAAUCCUUUUCUUGUUC	:.::.::::::::. ::.:::	GGAGGUUUAGGAAGCCAAUAAG	7	18	5019
miR-156	NVE1388	1265	1285	1275	1	0	1	No	UUGGCUCUUCUCUC-UCUGUCG	:..:: ::::: :: ::::::.	AGUCGCGAAGAUAGAAGACAGU	6.5	17.5	1339
miR-2037	NVE13977	734	755	745	1	1	0	No	GAGGCAAGAAUCUCCAAUCACA	. :: ::.: ::::::::::::	UGCCAUUUUCAGAGGUUAGUGU	5	18	3293
miR-2050	NVE14161	6595	6617	6607	1	0	1	No	AAUAAUGGUCACAGCCAUCAUAU	::. : :.::::::: :::: ::	UUGGU-CUAGUGUCGUUAGUUUA	7	18	6841
miR-9452	NVE14183	756	777	767	1	1	0	No	ACUGUU-AGUACUUCAUCUAGCA	:::: . :::::::::::::	AAACAACGUUUGAAGUAGAUCGU	5.5	17.5	1450
miR-9435	NVE14192	234	255	245	1	1	0	No	CAAAC-GGAUGGAUUUGACAAGG	:: :: .:::. :.::::::::.	GUGUGAUCUAUGUGAACUGUUCU	7	18	2310
miR-9437	NVE14234	1376	1398	1388	1	0	1	No	UGACUUUUUUAGAUUCUCGUUUA	.::. : :.::::::::::: :	CUUGGCAUAGUCUAAGAGCAAUU	6.5	17.5	1898
miR-9415	NVE14332	547	567	557	1	1	0	No	GCCUUCCUUGUCAGUUAA-UAU	.:::.:: .::::: ::: :::	UGGAGGGCGCAGUCCAUUCAUA	6.5	17.5	2765
miR-9466	NVE14462	1167	1189	1179	1	1	0	No	AAAGUGUGUCACGUGACCAACUG	: : :.. ::::::.::: ::::	UCUGAUG-AGUGCAUUGGCUGAC	7	17.5	2011
miR-9465	NVE14564	2063	2083	2073	1	1	0	No	CUCUCAUGUUCC-GCCAUUCAA	:::::: .:::: ::::.:::	GAGAGUUUAAGGAGGGUAGGUU	6.5	18	2778
miR-2024g	NVE14675	570	592	582	1	1	0	No	UAACAACAUCGGUUCUGUGUUC	: :::: :::::: :::::::	AGUGUUAUAGCCAUGACACAAU	5	18	2413
miR-2024g	NVE14676	82	104	94	1	0	1	No	UAACAACAUCGGUAUUGUGUUC	: :::: :::::::.::::::	AGUGUUAUAGCCAUGACACAAU	4	18.5	1053
miR-2024g	NVE14676	202	224	214	1	1	0	No	UAACAACAUCGGUUCUGUGUUC	: :::: :::::: :::::::	AGUGUUAUAGCCAUGACACAAU	5	18	1053
miR-2024a	NVE14893	1157	1179	1169	1	1	0	No	UUA-AAUAUCCGUACUGUGUCU	:.: :::::: :::::::::	AGUGUUAUAGCCAUGACACAUU	6.5	17.5	4311
miR-9419	NVE14945	245	265	255	1	1	0	No	CAAAUUCAAGAAU-UUAAAGAA	::::::::: :: :: :::::	UUUUAAGUUCGUAGAAGUUCUU	7	18	696
miR-9419	NVE15038	315	337	327	1	1	0	No	AGAAUUCAAAGUGUUUUUAAGAA	:.::::: :::..:.::.:::::	UUUUAAG-UUCGUAGAAGUUCUU	5.5	19.5	1895
miR-2024a	NVE15135	145	167	157	1	0	1	No	UCACCAUCUCGGUAUUUUUGUAA	:::: :: :::::: .: :::::	AGUGUUAUAGCCAU-GACACAUU	7	18.5	4436
miR-2050	NVE15226	156	176	166	1	1	0	No	UACCAGAAUACAGUGA-CAAAU	:::::: .::::..: :::::	UUGGUCUAGUGUCGUUAGUUUA	6.5	17.5	5928
miR-2024g	NVE15254	1394	1415	1405	1	1	0	No	CCCUAAUAUCUGUACUAUGUUA	: .:::::: ::::: :::::	AGUGUUAUAGCCAUGACACAAU	6.5	17.5	1718
miR-9419	NVE15536	1429	1451	1441	1	1	0	No	GGAGGACGAGCCAUCUUCAGGAA	..:. :.:: ::::::::.:::	UUUUAAGUUC-GUAGAAGUUCUU	7	17.5	2158
miR-2026	NVE1562	1149	1170	1160	1	0	1	No	UUUAUGCAGUAGACAAUUGCAA	:..:: ::::::::: ::: ::	AGGUA-GUCAUCUGUAAACUUU	6	18	1637
miR-2051	NVE15807	1838	1860	1850	1	0	1	No	GACAAAGAAAGGUAUUCUGGUU	:::: :::::.: :.::.:::	CUGUGUCUUUUC-UGAGGCCAU	7	17.5	2034
miR-9435	NVE15828	2335	2357	2347	1	1	0	No	AACGCGAGAAAGACUUGACGAGG	::.: ::: : :::::::.::.	GUGUGAUCUAUGUGAACUGUUCU	7	17.5	3312
miR-9424b	NVE15866	3724	3745	3735	1	0	1	No	UGAUCUUGAUAAGCCAACUUUA	:: .::.:::::.::: :::::	AC-GGAGCUAUUUGGUCGAAAU	5	18.5	4103
miR-9465	NVE15970	389	413	403	1	0	1	No	CUCUCCGGUUGCCUCCCAUCCUC	::::: ..:: ::::::::::	GAGAGUUUAA-GGAGGGUAGGUU	7	18	1452
miR-9463	NVE16345	696	716	706	1	1	0	No	AGUUGUA-UUAUGCGAUUUAGU	:..:::: :: :: ::::.:::	UUGACAUCAAGACUCUAAGUCA	7	17.5	813
miR-9412	NVE16440	1950	1972	1962	1	1	0	No	UGACAUAUAGUUUUUAGCAUACA	:: : : .:::.:::::::: ::	ACAGAAGGUCAGAAAUCGUAAGU	6.5	18	2168
miR-9415	NVE16603	1612	1635	1625	1	0	1	No	GUCUCCUGUGUCAGUUAUAGUAA	..::::.:.::::: :: ::::	UGGAGGGCGCAGUCCAU-UCAUA	7	18	2558
miR-9434	NVE16795	611	632	622	1	0	1	No	CAUAAGCCUGGAUUCCU-CCAGA	:: ::::: :.:::::: ::::	GUCUUCGGUCUUAAGGACAGUCU	7	18.5	2049
miR-2050	NVE16802	950	972	962	1	0	1	No	AAUCGAGCUUACAGGAAGCAAAU	::.: :: :.:::: :: :::::	UUGG-UCUAGUGUCGUUAGUUUA	7	18	1799
miR-9438	NVE16927	515	537	527	1	0	1	No	AACUGAGAGACUUGUGUCGUAA	:: .:::: :::::::: :::	UUAGCUCUGUGAACACAUCAUA	5.5	17.5	798
miR-9424b	NVE17085	1669	1690	1680	1	1	0	No	CGCCUCAAUACAGCCAGCUUAA	::::: ::: :.::::::: :	ACGGAGCUAU-UUGGUCGAAAU	7	17.5	2404
miR-2042	NVE17325	544	566	556	1	1	0	No	GAGCUGCAAAGGAUGAUUGAUGA	: . ::: :::::::::: ::.:	CAUCACG-UUCCUACUAAAUAUU	6.5	18	1515
miR-9454	NVE17440	312	332	322	1	1	0	No	CCUUCGAAACUGU-ACUUGGUA	:::. .:::: :: ::.:::::	GGAGUUUUUGUCACUGGACCAU	7	17.5	767
miR-9421	NVE17589	1540	1562	1552	1	0	1	No	UUUAUUUAAUGGUAGAUACGCGG	.: :::::::.::::::::..	UCGU-AAUUACCGUCUAUGCGUU	6	18	2025
miR-2051	NVE17692	2232	2253	2243	1	0	1	No	GAGACAGAAAAGACUAUCUGUG	:: :::::::::::: .: ::.	CUGUGUCUUUUCUGA-GGCCAU	6.5	18	2887
miR-9434	NVE1793	783	805	795	1	1	0	No	CAGGGUCUAGCAUUUUUGUCAGA	:::.. :.:: :::..:::::::	GUCUUCGGUCUUAAGGACAGUCU	6.5	18.5	856
miR-9423	NVE1799	921	943	933	1	1	0	No	CA-UAUUUGUUCAUACGUACUAA	:: :: :: :::::::: ::.:	GUCAUCAAGAAGUAUGCCUGGUA	7	17.5	1125
miR-9416	NVE18195	755	778	768	1	1	0	No	CAUGUGUGAUUUCUAGUGUUUUG	::.: ...:::: :::::::.:	GUGC-UGUUAAACAUCACAAGAA	7	17.5	938
miR-9464	NVE18455	681	703	693	1	1	0	No	ACUGUUUGACGAAAUC-UCUCAGA	: .::: ::::::: :::::::	CAAAGAACAGCUUUAGAAGAGUCU	6.5	18.5	1538
miR-2030	NVE18914	2571	2590	2580	1	0	1	No	AUCUCUUGGAA-GUUGUGCUG	:::::::. :: :::.::::.	UAGAGAAUGUUACAAUACGAU	6	17.5	3169
miR-9467	NVE1900	338	359	349	1	1	0	No	CCCGAGGGUUGUG-AAGAAAAUG	: : ::::. ::: :::::::::	GAGGUCCCGCCACAUUCUUUUAC	5.5	18.5	824
miR-9424b	NVE19054	204	225	215	1	1	0	No	UGCUGGUGAUAAAACAGCUUUA	:::. .:::::: ::::::::	ACGG-AGCUAUUUGGUCGAAAU	5	18	1072
miR-9419	NVE19224	363	383	373	1	1	0	No	GAGAUUCGAG-GUUUUCAGGAG	.:.::::.:: .:.::::.::.	UUUUAAGUUCGUAGAAGUUCUU	7	17.5	1029
miR-9435	NVE19351	86	107	97	1	0	1	No	GAUG-UAGAUUCAUUUGGCAAGA	:.. ::::: ::.:::.:::::	GUGUGAUCUAUGUGAACUGUUCU	7	18	912
miR-2050	NVE1944	812	833	823	1	1	0	No	GUCUAGAU-ACAGCAGUCAAAC	. :.:::: ::::::.:::::	UUGGUCUAGUGUCGUUAGUUUA	5	17.5	1137
miR-9449	NVE19483	3075	3097	3087	1	0	1	No	AUGAUCAGGAGUUUAAGAAGAUG	:.::: : . ::::::: ::::.	UGCUACU-UACAAAUUCCUCUAU	6.5	17.5	5147
miR-9434	NVE19576	1115	1138	1128	1	1	0	No	AAGGUGUCAGCAAUUCCUCUCAGA	::. :.::: ::::::: :::::	GUCUUCGGUC-UUAAGGACAGUCU	6	19	1414
miR-2030	NVE19646	195	216	206	1	1	0	No	UUCUUUUUUAAUGUUAUAGUUA	:::.:: .:::::::: :.::	UAGAGAAUGUUACAAUA-CGAU	6	17.5	1990
miR-9423	NVE1974	1611	1633	1623	1	0	1	No	CGUUGGUUGUU-AUAUGGACCAC	:. :.::: :: :::.::::::	GUCAUCAAGAAGUAUGCCUGGUA	7	17.5	2891
miR-9461	NVE19921	1792	1815	1805	1	1	0	No	UGAUUUGUCUCACUGUCAUUUUC	:: ::: : .:::::::::..:	ACCAAA-ACGGUGACAGUAGGAC	6.5	17.5	1989
miR-9460	NVE19991	3613	3632	3622	1	0	1	No	UUAAUCACGACAAGCGCGUG	:.::::::::: :.:::::.	AGUUAGUGCUGGUUGCGCAU	4	17.5	4251
miR-9421	NVE20154	805	826	816	1	1	0	No	AGCAGAAAUGGAUGAUAUGCAA	:::: ::::: ::::.::::	UCGUAAUUACCGUCUAUGCGUU	7	17.5	1296
miR-9419	NVE2019	1325	1347	1337	1	0	1	No	GACAUUCCAGCAUCUUCUAGAC	.: :::: ::::::::: :::	UUUUAAGUUCGUAGAAGUUCUU	5.5	17.5	1777
miR-2024g	NVE20647	169	191	181	1	0	1	No	CCGCCAUGUUUUGUACUGUGUUA	:.: ::. :. :::::::::::	AGUGUUAU-AGCCAUGACACAAU	7	17.5	1651
miR-9417	NVE20884	842	864	854	1	0	1	No	AGACAUUUGACGAUUUGUUCUCA	:::: ..:: :::: .:::::::	UCUG-GGACGGCUAUGCAAGAGU	6	18.5	2565
miR-9450	NVE20904	1121	1143	1133	1	1	0	No	CUUACGGAUUUCUUAGGAAUCA	:..:: ::::::: :.:::::	GGGUGACUAAAGAUUUCUUAGA	6	17.5	4169
miR-9440	NVE20928	1260	1281	1271	1	1	0	No	CAGGAGGA-GUUAUCGUUGAUUG	:::: :: ..: :::::::::.	GUCCAACUGUGAGAGCAACUAAU	7	17.5	1920
miR-2050	NVE21133	243	265	255	1	1	0	No	AGUCAGAUCUUAGCAGUCAAGC	:..:::::: .::::.::::.	UUGGUCUAGUGUCGUUAGUUUA	7	17.5	1774
miR-2042	NVE21285	184	205	195	1	1	0	No	GAAGUGCAAGGAUGAUCUAGGG	: :::::::::::::: :: ..	CAUCACGUUCCUACUAAAUAUU	6.5	18	1584
miR-9413	NVE21381	763	784	774	1	0	1	No	ACCUGUUCAUUGAUUACAUUUA	:::: .::.::::.:: ::::	UGGAAUGGUGACUAGUGAAAAU	6.5	17.5	1988
miR-9438	NVE21422	193	215	205	1	1	0	No	GAUAUGGGACACUUAUGGAGUAU	.:: .:.::::::: :: :::::	UUA-GCUCUGUGAACACAUCAUA	6.5	18.5	1456
miR-9468	NVE21535	1010	1032	1022	1	1	0	No	CGUCUACUGCCAAUGUGCGCUAC	: ::.:: .:::::::.:.:: :	GGAGGUGCUGGUUACAUGUGAAG	7	18	1301
miR-9452	NVE21550	1045	1067	1057	1	1	0	No	UUCAUUUCUAACUUCUUCUAGCA	:: :: : :::::: :::::::	AAACAACGUUUGAAGUAGAUCGU	6	18	1459
miR-2024e	NVE21566	1230	1251	1241	1	1	0	No	UCUGAACAUUGGAGGUGUGCAG	:: ::: ::::: ..::::::.	AGUCUUAUAACCAUUACACGUU	6.5	17.5	7029
miR-9426	NVE21620	514	535	525	1	1	0	No	CUUAUCAAGUCCUCAAAUUCAU	::: . :::.:::::::.:: :	GAAAGUUUCGGGAGUUUGAGAA	6.5	17.5	2634
miR-2036	NVE2174	496	518	508	1	1	0	No	AGCGACGAAAG-CGUACAAUAUU	.::: :: :: ::::::::::	AUGCUACUCUCAGCAUGUUAUAU	6.5	17.5	1319
miR-9434	NVE21892	1244	1265	1255	1	1	0	No	UGGAA-UCAAACUUCUUGUCAGG	..::: .:: : :::.::::::.	GUCUUCGGUCUUAAGGACAGUCU	7	17.5	1678
miR-2050	NVE21998	472	493	483	1	0	1	No	AGCAAGAUUACAGAAAUUAGAU	:.: ::::.:::: :::.:.::	UUGGUCUAGUGUCGUUAGUUUA	6	18	2333
miR-9419	NVE22040	142	162	152	1	0	1	No	AGAAUUUAUGCAUAUU-AGGAA	:.::::.: :::: :: :.:::	UUUUAAGUUCGUAGAAGUUCUU	7	17.5	1897
miR-9426	NVE22161	347	369	359	1	0	1	No	UUUGCGAAGCCUUCAAACAUCAU	.:: :.:::::.:::::: :: :	GAAAGUUUCGGGAGUUUG-AGAA	7	18.5	1926
miR-2042	NVE22300	599	622	612	1	0	1	No	AUAGUGUACUGGAUGAAUUAUAC	:::::.: :::::: :::::	CAUCACGU-UCCUACUAAAUAUU	6.5	17.5	1136
miR-9465	NVE22371	2719	2741	2731	1	0	1	No	CUCUCGGCCAUCCUUCCCUCCAA	:::::.. ::::.:: :::::	GAGAGUU-UAAGGAGGGUAGGUU	7	17.5	2817
miR-9415	NVE22527	1652	1672	1662	1	0	1	No	ACCUUCCUCGUC-GGAAAGUAU	::::.:: :::: :: ::::::	UGGAGGGCGCAGUCCAUUCAUA	5.5	18.5	1738
miR-2024e	NVE22550	2422	2442	2432	1	1	0	No	UCAG-AUACUGGUGAUCAGCAA	:::: ::: ::::.:: ::::	AGUCUUAUAACCAUUACACGUU	7	17.5	2485
miR-2051	NVE22591	28843	28864	28854	1	1	0	No	GGCAAAUGGAAAGGCUUUGGUA	:.:: : :.::::.::..::::	CUGUGU-CUUUUCUGAGGCCAU	6	17.5	30142
miR-2025	NVE22594	692	714	704	1	0	1	No	UCAGUUUUGUCGAGGCUAAAAAA	::..::. :: ::::::::::	UGUUGAAGGCGC-CCGAUUUUUU	6.5	17.5	2399
miR-2037	NVE22603	1166	1187	1177	1	1	0	No	AUGAUAAAAGUCUUCAAUCAAA	:.: :::::::::.:::::: :	UGCCAUUUUCAGAGGUUAGUGU	4.5	19	2486
miR-2030	NVE227	1077	1098	1088	1	0	1	No	AUCUCUUGGAAUCUUAUGCCUA	:::::::. ::: ::::: :::	UAGAGAAUGUUACAAUAC-GAU	5.5	18.5	1497
miR-9447	NVE22995	2236	2257	2247	1	1	0	No	GCUUAUUGAAGAA-GUGAAUCA	:: :.::::::: :::::::	CGUCUGACUUCUUCCACUUAGC	5.5	17.5	3235
miR-9423	NVE23190	286	307	297	1	1	0	No	GAGGAAAUCUUCAUA-GGACUAU	:: : :::::::: ::::.::	GUCAUCAAGAAGUAUGCCUGGUA	7	17.5	1299
miR-2030	NVE23214	835	855	845	1	0	1	No	AUCUCUGACAAUGCUUUGCUA	:::::: :::::: : :::::	UAGAGAAUGUUACAAUACGAU	5	18	1501
miR-9419	NVE2329	860	880	870	1	1	0	No	GGAAGUUGAGCGUC-UCAAGAA	..:: :..:::.:: :::::::	UUUUAAGUUCGUAGAAGUUCUU	6	17.5	2088
miR-9444	NVE23392	280	300	290	1	1	0	No	AGAAGGUCGGCGAUUG-UCGUG	::: ::: :::: ::: ::::.	UCUCCCAACCGCCAACAAGCAU	6.5	17.5	538
miR-2022	NVE23413	1393	1416	1406	1	1	0	No	GCAGGUCAAAGAGCAACAAGUAGA	:: :: :::: :::::: ::.:.:	CGCCCUGUUU-UCGUUGAUCGUUU	7	19	3997
miR-9446	NVE23510	300	321	311	1	1	0	No	GCAAGACUGAAAAAAGAAAAAA	.:: ::: :: : :::::::::	UGUACUG-CUGUAUUCUUUUUU	6.5	17.5	712
miR-9449	NVE2359	282	304	294	1	0	1	No	ACGGUGAGUGUUUUGGGAGAUU	:::.:::.::::: .::::::	UGCUACUUACAAAUUCCUCUAU	5	18.5	445
miR-9419	NVE23710	5333	5355	5345	1	1	0	No	AGAGUUCACAGCGUCCUCAAGCA	:.:.:::: :::.:: ::::: :	UUUUAAGU-UCGUAGAAGUUCUU	7	18.5	7172
miR-2038	NVE23812	2299	2319	2309	1	0	1	No	CUAUUGUGGUGACAUUAUGGU	.::..::::::::::: :::	AGUAGUACCACUGUAAUUCCA	4.5	17.5	3040
miR-9468	NVE23867	554	575	565	1	1	0	No	CUUCUAGUAAC-AUGUACACUUC	:.::.: : : :::::::::::	GGAGGUGCUGGUUACAUGUGAAG	6	18	998
miR-2024e	NVE23869	1160	1180	1170	1	0	1	No	UGAGGGUAUUGGU-AUGUUCAA	: ::..::::::: :::: :::	AGUCUUAUAACCAUUACACGUU	6	18	3542
miR-9447	NVE23973	932	952	942	1	1	0	No	GCGGA-UGAAGAAGGUGGAAAG	::.:: :::::::::::.: :	CGUCUGACUUCUUCCACUUAGC	6.5	18	2613
miR-9413	NVE23980	445	467	457	1	0	1	No	UCCUGACGCAUUGAUUGCUUUUG	::: :: ::.::::..:::::.	UGGAAUG-GUGACUAGUGAAAAU	6.5	18	601
miR-9466	NVE24059	4621	4641	4631	1	0	1	No	AAAUCACUCACG-AACCGGUUG	: :. ::::::: :::::..::	UCUGAUGAGUGCAUUGGCUGAC	6.5	17.5	4920
miR-9424b	NVE24295	2683	2704	2694	1	0	1	No	UGUCUGCAAUAAAACAGCUUUA	::.:: : ::::: ::::::::	ACGGA-GCUAUUUGGUCGAAAU	4.5	18.5	3492
miR-2022	NVE24337	401	422	412	1	0	1	No	GAGGAACAAGAGCGGCU-GCAAG	: :: ::::.:::..:: ::::.	CGCCCUGUUUUCGUUGAUCGUUU	7	18	1208
miR-9419	NVE2456	6019	6040	6030	1	0	1	No	CAAAUU-AAGUAUCUUGAAGAU	::::: :::.::::: ::::	UUUUAAGUUCGUAGAAGUUCUU	6	17.5	13988
miR-2050	NVE24690	532	554	544	1	0	1	No	AAGCAGAUUAUACGUAAUCGAAU	:: :::::.:.: :.::::.:::	UUGGUCUAGUGU-CGUUAGUUUA	6.5	19	993
miR-9446	NVE2476	1214	1235	1225	1	1	0	No	UCACGACUAUCAUAGGAAAAAA	:: ::: : ::::.:::::::	UGUACUGCU-GUAUUCUUUUUU	6	17.5	1791
miR-9421	NVE24823	28091	28111	28101	1	0	1	No	GGUAGUGAUGGUAGAU-CGCAG	.:.: :.::::.:::: ::::.	UCGUAAUUACCGUCUAUGCGUU	6	17.5	34697
miR-9412	NVE25093	442	466	456	1	1	0	No	UAGCUCCCAAGUUUUUAGCAUUUC	: :: :: :::.:::::::::.	ACAGAAGG-UCAGAAAUCGUAAGU	7	18	621
miR-2050	NVE25230	1093	1115	1105	1	0	1	No	AACUACAUCACAGCAAACACAA	:::.: :::::::::: :: :	UUGGUCUAGUGUCGUUAGUUUA	6.5	17.5	1261
miR-9412	NVE25269	3055	3077	3067	1	1	0	No	UUUCUUCCAGUCUUCAAAAUUCA	: :::::::::::: : :::::	ACAGAAGGUCAGAAAUCGUAAGU	7	19	3784
miR-9419	NVE25325	521	541	531	1	0	1	No	GAAAUGC-AGCACCUUGAAGAA	.:::: : :::: ::: :::::	UUUUAAGUUCGUAGAAGUUCUU	6.5	17.5	968
miR-9435	NVE25337	858	879	869	1	0	1	No	UAUGCUGGAUACACUGGA-AAGA	.:..::.:::::::: :: ::::	GUGUGAUCUAUGUGAACUGUUCU	6	19	6128
miR-9427	NVE25940	1052	1073	1063	1	1	0	No	CCACUCAGAUCU-ACUGGUCUCU	:::: .:::: ::::::::::	AGUGAAGUUAGAGUGACCAGAGA	5.5	18.5	2011
miR-9458	NVE25986	227	248	238	1	1	0	No	GCCGCUGCUUCUUUGCUCGCGU	:: :: : :::::::::::::	GGGAGAGGUAGAAACGAGCGCA	4	18	776
miR-9447	NVE26007	2887	2909	2899	1	0	1	No	GCAGACUGAAGGAGGUUACUCA	:::::::::::.:::: : ::	CGUCUGACUUCUUCCACUUAGC	6	18.5	13775
miR-9446	NVE26022	93	114	104	1	1	0	No	ACAAGAUGACGUGAAGAACAAA	::: ::.:::.: ::::: :::	UGUACUGCUGUA-UUCUUUUUU	6.5	18	2005
miR-9421	NVE26039	135	155	145	1	0	1	No	AGU-UUAGCGGCAGAUCCGCAA	::. :::. ::::::: :::::	UCGUAAUUACCGUCUAUGCGUU	5	18	1176
miR-2030	NVE26192	151	172	162	1	0	1	No	AGCCCUUGGAAUGUUGAUGCUA	: : :::. :::::: ::::::	UAGAGAAUGUUACAA-UACGAU	5.5	17.5	1554
miR-9446	NVE2795	2726	2747	2737	1	1	0	No	ACUAGUCGACAUGAAGAAGAAA	:: : :::::: :::::.:::	UGUACUGCUGUA-UUCUUUUUU	6	17.5	3869
miR-9419	NVE3099	1163	1185	1175	1	0	1	No	AGACUUUAAUCAUCUUCAAGAC	:.: ::.:: :::::::::::	UUUUAAGUUCGUAGAAGUUCUU	5	18	2909
miR-9466	NVE3177	1034	1054	1044	1	1	0	No	AAAUUACUUACCUAA-UGACUG	: :.::::.:: ::: .:::::	UCUGAUGAGUGCAUUGGCUGAC	7	17.5	3766
miR-9419	NVE3181	228	249	239	1	1	0	No	AAACUUCAAGGCUCUUCAAGAG	::: :::::: :::::::::.	UUUUAAGUUCGUAGAAGUUCUU	5.5	18.5	583
miR-2050	NVE3334	545	567	557	1	1	0	No	AAGCAGAUUACAUCAAUCAGCAU	:: :::::.::: ::::::. ::	UUGGUCUAGUGUCGUUAGUU-UA	6.5	19	751
miR-2022	NVE3472	20724	20746	20736	1	1	0	No	GACAGGCAGAAGCAACUAGAGAA	: :.::.:::::::::: .::	CGCCCUGUUUUCGUUGAUCGUUU	7	17.5	35619
miR-9461	NVE3714	382	404	394	1	0	1	No	UGUUGUUGUUGUUGGUCAUCCUG	:: : :::....: :::::::::	ACCAAAACGGUGA-CAGUAGGAC	7	18	2309
miR-9419	NVE3737	571	592	582	1	0	1	No	GAAAUCCAAGCAUCUAUGAGAA	.:::: ::::::::: ..::::	UUUUAAGUUCGUAGAAGUUCUU	5.5	18.5	2113
miR-9419	NVE3786	211	233	223	1	1	0	No	GAAAUUGGAAGUAACUUCAGGAA	.::::: :::.: :::::.:::	UUUUAA-GUUCGUAGAAGUUCUU	6.5	18.5	616
miR-9438	NVE3792	1524	1546	1536	1	1	0	No	AAUCUAGAAGAAUUGUGUAGAAU	:::: :: : : :::::::: ::	UUAGCUC-UGUGAACACAUCAUA	7	18	2281
miR-9413	NVE4111	1038	1060	1050	1	0	1	No	ACUGUACCAACUGAUCACUUCCG	::. :::: ::::::::::: .	UGGAAUGG-UGACUAGUGAAAAU	7	18	1363
miR-9447	NVE4500	976	998	988	1	1	0	No	GUACCUUGACAGAGGGUGAAUAG	:.: .::: :::.::::::: :	CGUCUGACU-UCUUCCACUUAGC	7	17.5	1427
miR-9454	NVE456	5919	5942	5932	1	0	1	No	GCUCAAAAUCAGUGACAUUGGUU	::::::: ::::::: .::::	GGAGUUUUUGUCACUG-GACCAU	6	18.5	6434
miR-156	NVE4646	713	735	725	1	0	1	No	UCAGCUGUUCUGUCCAUCUGUCA	::::: ::::.: : :::::::	AGUCGCGAAGAUA-GAAGACAGU	7	18.5	1679
miR-9416	NVE4733	636	659	649	1	0	1	No	CAAGAACUAUUUGUAGUGGUCUG	:: : :: :::::::::: :::	GUGC-UGUUAAACAUCACAAGAA	6	18	1074
miR-2022	NVE4746	143	164	154	1	1	0	No	GAUGGAU-AAAGCAAUUAGAAAG	: :::. :::::::.::: ::.	CGCCCUGUUUUCGUUGAUCGUUU	7	17.5	8530
miR-2024g	NVE4923	139	161	151	1	1	0	No	UAACAAUAUAGGUGCUGUGUUC	: ::::::: :::.:::::::	AGUGUUAUAGCCAUGACACAAU	5	18.5	2420
miR-9466	NVE4941	304	325	315	1	1	0	No	AGAAUGGUCACGUGAUCGUCUG	::: :. ::::::.:.:: :::	UCUGAUGAGUGCAUUGGCUGAC	6.5	17.5	1108
miR-9417	NVE5009	1483	1505	1495	1	1	0	No	GGAUCAUGCUGAUAUCGUUGUCG	.::.: :::.:::: :::: ::.	UCUGGGACGGCUAU-GCAAGAGU	7	18	2302
miR-2051	NVE5091	630	651	641	1	1	0	No	GACACGGAAAAGACCCUGGUU	:::::.:::::::: :.:::	CUGUGUCUUUUCUGAGGCCAU	4.5	18	2646
miR-9463	NVE5159	914	934	924	1	0	1	No	AAAUGUAGUUUU-AGUUUCGGU	:: :::::::.: :: :::.::	UUGACAUCAAGACUCUAAGUCA	7	18	1326
miR-9415	NVE5300	4165	4185	4175	1	0	1	No	GCCUUCCUUGUCAGUUAA-UAU	.:::.:: .::::: ::: :::	UGGAGGGCGCAGUCCAUUCAUA	6.5	17.5	6233
miR-9437	NVE5334	64	85	75	1	0	1	No	GCACCAUG-CAGAUUUUCGUCAA	: ::: :. ::::::.:::: ::	CUUGGCAUAGUCUAAGAGCAAUU	6.5	18	281
miR-9413	NVE5350	1006	1027	1017	1	0	1	No	UCCUUAUUACGGAACACUUUUA	:::::..:: :: ::::::::	UGGAAUGGUGACUAGUGAAAAU	6	18	1159
miR-9426	NVE5375	2909	2931	2921	1	0	1	No	GUAUCAAUAGUUCUUAAACUUUU	: :::: ::..::.:::::.::	GAAAGUU-UCGGGAGUUUGAGAA	7	18	2972
miR-9424a	NVE5490	3597	3619	3609	1	1	0	No	CUUGGGACGAUGAGCCAACCAUA	.:: :::::::::::: :::	UGACGGAGCUACUCGGUUGAUAU	6.5	17.5	6815
miR-2024a	NVE5522	914	934	924	1	0	1	No	UCACAAUAUCGAUACUG-AUGA	::::::::::: ::::: :.:	AGUGUUAUAGCCAUGACACAUU	7	18.5	2031
miR-2024g	NVE5581	1026	1048	1038	1	1	0	No	UAACAAUAUCGGUGCUGUGUUC	: :::::::::::.:::::::	AGUGUUAUAGCCAUGACACAAU	3	19.5	4309
miR-9447	NVE5658	1638	1659	1649	1	1	0	No	CCAGGCUGAGGAAGGAGACUCG	:::.::::.::::: :: :::	CGUCUGACUUCUUCCACUUAGC	6.5	18	2626
miR-9421	NVE5836	3007	3027	3017	1	0	1	No	AGC-UGGAUGGCGGAAACGCGA	::: : .:::::.:: ::::.:	UCGUAAUUACCGUCUAUGCGUU	6.5	17.5	4999
miR-9446	NVE6003	19	39	29	1	0	1	No	ACAGGACGGUAUACGAGAAAA	::: ::::..::: ::.::::	UGUACUGCUGUAUUCUUUUUU	6	17.5	494
miR-9458	NVE6076	1258	1279	1269	1	1	0	No	UCCUCACCAUCUUUGCUUGAUU	.:::: :::::::::::.: :	GGGAGAGGUAGAAACGAGCGCA	6.5	18	1829
miR-9418	NVE610	314	335	325	1	1	0	No	GGAACAGUUCCA-AGAUGUGCUU	:.:::::::::: ::::..:::	CUUUGUCAAGGUAACUACGUGAA	6.5	19.5	2718
miR-2051	NVE6226	1740	1761	1751	1	1	0	No	GUCACAGAUAAAGACUCUAGCA	: :::::: ::::::::. : :	CUGUGUCU-UUUCUGAGGCCAU	7	17.5	4314
miR-9417	NVE6277	2526	2548	2538	1	1	0	No	AGAAAUUUGUCGAUGUGUUUUCG	:: : ..::.::::..:::.::.	UC-UGGGACGGCUAUGCAAGAGU	7	17.5	6155
miR-9420	NVE6447	759	780	770	1	0	1	No	GGCCAGUAGGCUAGAUUUGUGU	::::: :::: :::::::.:	AGGGUCAGCCGA-CUAAACAUA	6	17.5	826
miR-9450	NVE6517	503	525	515	1	1	0	No	GCUACUGUCUUGCUAAAGAGUCU	:.:::: :: :::::::.:::	GGGUGAC-UAAAGAUUUCUUAGA	6.5	18	985
miR-9454	NVE6525	8503	8525	8515	1	1	0	No	CAUCGAGAACAGUGACCUACGUG	: ::.:.::::::::::: ::.	GGAGUUUUUGUCACUGGA-CCAU	6.5	18.5	11586
miR-9421	NVE6528	278	298	288	1	0	1	No	AGCACAAAUGGGAGA-ACGCGA	:::: ::::: ::: ::::.:	UCGUAAUUACCGUCUAUGCGUU	7	17.5	2529
miR-2024f	NVE6833	2331	2351	2341	1	1	0	No	AUGACAUUGGUUGAUCUGCAA	: .::::::: :::: :::::	UCUUGUAACC-ACUACACGUU	5.5	17.5	2782
miR-9458	NVE6946	151	171	161	1	1	0	No	UGCUCUCUAUUUUU-CUCUCGU	. :::::.::.::: ::: :::	GGGAGAGGUAGAAACGAGCGCA	7	17.5	1752
miR-9458	NVE711	725	745	735	1	1	0	No	CCUUCUCCGUUUCUGCU-GUGU	::.:::::.:.: :::: :.::	GGGAGAGGUAGAAACGAGCGCA	7	18	8297
miR-2036	NVE7195	1418	1439	1429	1	1	0	No	UCUGCUAACAGUCGU-CAAUAUA	: .: : : :::::: :::::::	AUGCUACUCUCAGCAUGUUAUAU	6.5	17.5	3535
miR-9447	NVE7403	1372	1393	1383	1	1	0	No	GCAGACUCAAGAGUGUGAAUCG	::::::: ::::. ::::::::	CGUCUGACUUCUUCCACUUAGC	4	19.5	1463
miR-2050	NVE7495	149	171	161	1	0	1	No	AAUCGAAGCAACAGUGAUUAAAU	::.:. : : ::::..::.::::	UUGGUCUAG-UGUCGUUAGUUUA	7	17.5	1119
miR-9419	NVE752	178	200	190	1	0	1	No	GGAAAUGAAUCAUCUUCAGAGGA	..:: : :: :::::::: ::.:	UUUUAAGUUCGUAGAAGU-UCUU	7	17.5	351
miR-9449	NVE7775	1162	1182	1172	1	0	1	No	GCGAUGGAUG-UCGAGGAGAUG	.:::::.::: : .:::::::.	UGCUACUUACAAAUUCCUCUAU	6.5	18	2403
miR-9446	NVE7914	2319	2339	2329	1	0	1	No	ACAUAACGACAUAACAAAAUA	:::: ::::::::: :::: :	UGUACUGCUGUAUUCUUUUUU	5	18	3190
miR-9434	NVE796	2193	2214	2204	1	0	1	No	CAGUAUUUAGAGUUCCUGU-GGA	::: : ..:::.::::::: .::	GUCUUCGGUCUUAAGGACAGUCU	7	18	5507
miR-9435	NVE7984	4041	4064	4054	1	0	1	No	CGUCAUUAGAUACGCUUGAGAAUA	:. ::.:::::::.::::: :: :	GU-GUGAUCUAUGUGAACUGUUCU	7	19.5	4367
miR-9423	NVE8020	4098	4120	4110	1	1	0	No	CAGU-GUUCCUCAUGCGGACUGC	:::: :::: ::::.:::::..	GUCAUCAAGAAGUAUGCCUGGUA	6	18.5	5458
miR-9457	NVE8105	414	437	427	1	1	0	No	AGUGGUGUUUCUAAGAGUGUGUC	::.. : ::::: :::.:::::	UCGUGA-AAAGAAUCUUACACAU	7	17.5	5678
miR-9446	NVE8167	1338	1358	1348	1	1	0	No	ACAUAACAACAUAAGAAAAAA	:::: :: :::::::::::::	UGUACUGCUGUAUUCUUUUUU	2	19	4156
miR-9417	NVE8280	1005	1027	1017	1	1	0	No	GGAGUCUCUCGGAUACGUUCUUA	.:: .:: .: ::::::::::.:	UCUGGGACGG-CUAUGCAAGAGU	6.5	18	1991
miR-9413	NVE8438	7	29	19	1	1	0	No	AUUUGGUCACUGUAUUGCUUUUA	:..: ..::::: ::..::::::	UGGAAUGGUGAC-UAGUGAAAAU	7	18	736
miR-2042	NVE8465	899	920	910	1	0	1	No	GUA-UUCAAGGUUGAUUUGUAU	::: : ::::: ::::::.::	CAUCACGUUCCUACUAAAUAUU	6	17.5	1590
miR-9447	NVE8544	695	715	705	1	1	0	No	GUAUA-UGAAGAAUGUGAAGCG	:.: : ::::::: ::::: ::	CGUCUGACUUCUUCCACUUAGC	6.5	17.5	1394
miR-9435	NVE8557	203	224	214	1	1	0	No	UGUA-UGGAUGCAUUUGUCAAGA	...: :.:::.::.::: :::::	GUGUGAUCUAUGUGAACUGUUCU	7	18	1823
miR-2050	NVE8977	1621	1642	1632	1	1	0	No	GAAUAGAUGAUAGUAAUCAAGU	.: .:::: :.::.::::::.:	UUGGUCUAGUGUCGUUAGUUUA	6	17.5	1762
miR-9446	NVE9002	1181	1202	1192	1	0	1	No	CCACGACGAUAUGAAGGAGAAA	:: :::::.:: :::.:.:::	UGUACUGCUGUA-UUCUUUUUU	7	17.5	1542
miR-9446	NVE9125	1270	1291	1281	1	1	0	No	GUAUGACGACAGAAAGAUAAAA	..::::::::: :::: ::::	UGUACUGCUGU-AUUCUUUUUU	7	18	2121
miR-9424b	NVE9234	2313	2334	2324	1	0	1	No	UGCUUGUGUAAACCAGGCUUUA	:::.: .::::::: ::::::	ACGGAGCUAUUUGGU-CGAAAU	5	18	5788
miR-2030	NVE9237	3602	3623	3613	1	0	1	No	AUUUUUUCACACUGUUAUGUUG	::.:.:: ::: :::::::.:.	UAGAGAA-UGUUACAAUACGAU	5.5	18	4031
miR-2030	NVE9265	1337	1358	1348	1	1	0	No	ACUUUUUGUCAAUGUUAAGCUA	: .:.::. :::::::: ::::	UAGAGAAU-GUUACAAUACGAU	5.5	17.5	1558
miR-9444	NVE9330	716	738	728	1	1	0	No	GGAGGGGAUGGAUGUUGUUCGUA	.:: ::: ::: ::::::::::	UCU-CCCAACCGCCAACAAGCAU	6.5	18.5	1418
miR-2025	NVE9541	11159	11181	11171	1	1	0	No	AUGACAUCCGGCGCGUUAAAAGA	:..:: ::: ::: :.:::::.:	UGUUGAAGG-CGCCCGAUUUUUU	7	18	13557
miR-9432	NVE9547	3102	3123	3113	1	1	0	No	CAUCCCAAUCCUUCAGUCAUUC	: ::: :::::::: :: ::::	GGAGGUUUAGGAAGCCAAUAAG	6	18	4911
miR-9466	NVE9617	2185	2205	2195	1	1	0	No	AGAUUG-UUACGUAAUCGACCG	:::.:. :.::::::.:::: :	UCUGAUGAGUGCAUUGGCUGAC	5.5	18	2498
miR-2038	NVE9619	638	659	649	1	1	0	No	UCUUUAUGGUGAUAUUUCAGGU	:: :.:::::::.: :: ::::	AGUAGUACCACUGU-AAUUCCA	6.5	18	987

## Sheet: degradomeReadCounts_q20
mirName	targetId	targetMatchStart	targetMatchEnd	cleavagePos	degradomeReadCount	countReplicate1	countReplicate2	inBothReplicates	targetSeq	aln	mirSeq	alnScoreWeightedMismatch	alnScoreMatch	geneSize
miR-2051	NVE4448	937	958	948	488	241	247	Yes	GACAUCGAGGAAGACUCCGUUG	::::. :: .::::::::: :.	CUGUGUCU-UUUCUGAGGCCAU	6	17.5	1855
miR-2025	NVE12346	818	839	829	208	95	113	Yes	GCGACCUCCGCGAGCUAAAAAA	.:.:: :::::: :::::::::	UGUUGAAGGCGCCCGAUUUUUU	4	19	982
miR-9426	NVE6645	7311	7332	7322	204	99	105	Yes	CUUUCAAAGCCCUCAAACUCUU	::::::::::::::::::::::	GAAAGUUUCGGGAGUUUGAGAA	0	22	12307
miR-2030	NVE19315	1214	1234	1224	124	46	78	Yes	GUCUCUUACAAUGUUACGCUA	.::::::::::::::: ::::	UAGAGAAUGUUACAAUACGAU	2.5	19.5	34045
miR-2024e	NVE7149	632	653	643	84	48	36	Yes	UCAGAGCAUUGGUCUUGUGCAG	:::::. :::::: ::::::.	AGUCUUAUAACCAUUACACGUU	6	18	5046
miR-9412	NVE4779	1006	1028	1018	68	33	35	Yes	UGUCUUCCAGUCUUUAGCAUUCA	:::::::::::::::::::::::	ACAGAAGGUCAGAAAUCGUAAGU	0	23	1162
miR-2023	NVE21766	2298	2319	2309	53	38	15	Yes	UCUUACCACAUGUACUUCUUG	.:.:::::: ::::::::::	GGGAUGGUGAACAUGAAGAAA	4	18	2987
miR-9446	NVE9571	1364	1385	1375	50	20	30	Yes	AAAAGAUGAUCAUGAGAAGAAA	: : ::.:: :::.::::.:::	UGUACUGCU-GUAUUCUUUUUU	6.5	17.5	1738
miR-9421star	NVE11020	649	670	660	48	30	18	Yes	AAUACAGUAUCUGCUAUUUGUG	::: ::::::.:.::::.::	UUAAAGCAUAGAUGGUAAAUAC	6	17.5	879
miR-2026	NVE21279	1387	1407	1397	46	23	23	Yes	UCUAUCAGUGGACAUUUGAAA	::.::::::.:::::::::::	AGGUAGUCAUCUGUAAACUUU	1.5	20	1584
miR-2024g	NVE5582	617	639	629	42	29	13	Yes	UAACAAUAUCGGUGUUGUGUUC	: :::::::::::..::::::	AGUGUUAUAGCCAUGACACAAU	4	19	1196
miR-2047star	NVE19778	271	293	283	39	21	18	Yes	AAUACGGCGUAGCAAGUGUUGGA	::: :: :: :::: .:::.:::	UUAAGCGGC-UCGUCUACAGCCU	7	18	1686
miR-9419	NVE23143	976	997	987	34	17	17	Yes	CCAAUCCAAGCGUCUUCAAGGA	::: :::::.::::::::.:	UUUUAAGUUCGUAGAAGUUCUU	5	18	1099
miR-2024g	NVE4923	260	281	271	33	19	14	Yes	UAACAAUAUCGGUGCUGUGUUG	: :::::::::::.:::::::.	AGUGUUAUAGCCAUGACACAAU	2.5	20	2420
miR-9446	NVE3357	94	115	105	28	8	20	Yes	GCAUAAUGACAAAAAGAAAGAA	.::: :.::: : ::::::.::	UGUACUGCUG-UAUUCUUUUUU	7	17.5	2257
miR-9444	NVE21419	1677	1698	1688	26	8	18	Yes	AGAGGGUUGGCGGUUGUUCGUA	::::::::::::::::::::::	UCUCCCAACCGCCAACAAGCAU	0	22	6506
miR-2024e	NVE21967	177	199	189	26	16	10	Yes	UCACAAUACCGGAUAAUGUGGAA	::: :::: :: ::::::: ::	AGUCUUAUAACC-AUUACACGUU	7	18	868
miR-9416star	NVE2552	425	447	437	25	19	6	Yes	GCCUGACGAGUUACGAGAUGACG	:: ::: : ..::::::::: ::	CGUACU-CGUGAUGCUCUACAGC	6.5	18	989
miR-9415	NVE3206	6496	6517	6507	24	9	15	Yes	ACCUCCCCUGUCA-GUAUGUAA	::::::: .:::: ::: :::	UGGAGGGCGCAGUCCAUUCAUA	6.5	17.5	7205
miR-9464	NVE16364	2054	2078	2068	24	15	9	Yes	AUUAGUGGGCGAAAUCUUCUCAAGA	:: : : :::::::::::: :::	CAAAGAACAGCUUUAGAAGAG-UCU	7	19	2301
miR-2024e	NVE7149	1352	1373	1363	24	15	9	Yes	UCUGAAUAUUGGUGGGGUGCAG	:: ::::::::::.. :::::.	AGUCUUAUAACCAUUACACGUU	5.5	18.5	5046
miR-2026	NVE18201	2011	2032	2022	24	10	14	Yes	UCCAUCAUUAGAACAGUUGCAA	::::::: ::: ::: ::: ::	AGGUAGUCAUC-UGUAAACUUU	7	18	4247
miR-9412star	NVE5334	12	34	24	22	9	13	Yes	UUCUAAGGUUCUCUUCGA-ACAA	:.::: :::::::::.: :::	AGGAUGACAAGAGAAGUUCUGUA	6.5	18	281
miR-9425	NVE18711	554	575	565	22	15	7	Yes	UCAAGCUAUUUUAGGUGAUUUU	:: ::::::::: :::: :.::	AG-UCGAUAAAACCCACAAGAA	6	18.5	724
miR-9427	NVE17752	892	916	906	20	9	11	Yes	UCAACUCCGACCUCACUCGUCUCA	:: ::: :.: :::::: :::::	AG-UGAAGUUAGAGUGACCAGAGA	6.5	18.5	1440
miR-9435star	NVE19557	827	849	839	19	11	8	Yes	GGACUUGUCUCUUGUCUCUGGCA	: ::. ::: : :::::::.:::	CGUGGUCAGUGCACAGAGAUCGU	6.5	18	1162
miR-2024a	NVE5582	497	519	509	19	14	5	Yes	UAACAAUAUAGGUGCUGUGUAC	: ::::::: :::.:::::::	AGUGUUAUAGCCAUGACACAUU	5	18.5	1196
miR-2051star	NVE19791	3915	3935	3925	19	10	9	Yes	GAAGUUGGAA-UUUUUCAAUUU	.::...:::: .::::: ::::	UUUUGGCCUUCGAAAAGAUAAA	7	17.5	4068
miR-9421	NVE13902	1139	1161	1151	16	8	8	Yes	AUCAUUAAUGACAGAUAUGACAG	: :::::::: ::::::.: ::.	UCGUAAUUACCGUCUAUGC-GUU	6.5	19	2179
miR-9424a	NVE26192	748	772	762	16	11	5	Yes	AAUGUCGUAAAUGAGCCAACUGUC	: ::.: : :::::::::::.:	UGACGG-AGCUACUCGGUUGAUAU	6.5	18	1554
miR-9465	NVE69	228	248	238	15	15	0	No	CUUUUAAAAUCCU-UAAUCCAA	::.:.::: :::: . ::::::	GAGAGUUUAAGGAGGGUAGGUU	7	17.5	809
miR-2024e	NVE21566	510	531	521	14	9	5	Yes	UCAGAACAUUGGUGGGGUGCAG	:::::: ::::::.. :::::.	AGUCUUAUAACCAUUACACGUU	5.5	18.5	7029
miR-9423	NVE13734	224	247	237	13	8	5	Yes	GAGAGGUAUUUUCAGACGGACUAU	:: .:: :.:::: ::::::.::	GUCAUCA-AGAAGUAUGCCUGGUA	7	18.5	583
miR-9417star	NVE23054	316	339	329	12	4	8	Yes	GUCCAAAGAGAGUCUCGCUACUA	.::: ::::::::.::: :::	UAGGAGUCUCUCAGGGCG-UGAG	6.5	18	920
miR-9436	NVE24059	4757	4776	4766	12	9	3	Yes	AUAUACAAAUA-UUGCGUUCA	:.:::::::.: ::::::. :	UGUAUGUUUGUAAACGCAGUU	6.5	17.5	4920
miR-9447	NVE9541	10021	10042	10032	12	5	7	Yes	GCGGGUAGAAGAAGGUGCUUCG	::.:.. :::::::::: :::	CGUCUGACUUCUUCCACUUAGC	6.5	17.5	13557
miR-9450	NVE9925	227	247	237	12	4	8	Yes	CCCAGUGAUGUCUAAAG-UUCU	:::: :::: ::::::: :::	GGGUGACUAAAGAUUUCUUAGA	7	18	2273
miR-2022	NVE10311	614	636	626	12	3	9	Yes	AGAGUAGAAGAGCAACUAGCAAA	: : ::.:::::::::::::	CGCCCUGUUUUCGUUGAUCGUUU	5.5	17.5	1050
miR-2024e	NVE12252	1106	1128	1118	12	7	5	Yes	UCAGAAUACUGGUAAUGUGCAU	:::::::: ::::::::::::	AGUCUUAUAACCAUUACACGUU	2	20	1867
miR-2030	NVE16364	2153	2174	2164	12	4	8	Yes	AUAUUUUCCAAUGUUACUGUUG	:: :.:: :::::::: ::.:.	UAGAGAAUGUUACAAU-ACGAU	6	17.5	2301
miR-2050	NVE16837	1484	1505	1495	12	6	6	Yes	AAUCAGAUCACAGU-AUCAAAA	::.::::::::::. ::::::	UUGGUCUAGUGUCGUUAGUUUA	4.5	19	7092
miR-9446	NVE24273	782	803	793	11	6	5	Yes	ACCUGUCAACAUCAAGAAAGAA	:: :: : :::: ::::::.::	UGUACUGCUGUA-UUCUUUUUU	6	17.5	1519
miR-9447	NVE10030	1301	1322	1312	11	9	2	Yes	GCGUAGCGAAGAAGAUGAAUCG	::. : ::::::: :::::::	CGUCUGACUUCUUCCACUUAGC	5.5	17.5	1418
miR-9464	NVE17500	2610	2633	2623	11	9	2	Yes	GUUUCUUGUCGAUAUCUUCUCAGA	:::::::::::: :::::::::::	CAAAGAACAGCUUUAGAAGAGUCU	2	23	4780
miR-9419	NVE22308	585	606	596	10	4	6	Yes	GAAAUUC-AGCGUCUUCAAGAC	.:::::: :::.:::::::::	UUUUAAGUUCGUAGAAGUUCUU	3.5	19	733
miR-2041bstar	NVE3113	5628	5649	5639	10	5	5	Yes	GCGUUAAAUAAAGAUAUUCUUG	.::::: : :::.:::..:.::	UGCAAUCUCUUUUUAUGGGGAC	6.5	17.5	9183
miR-9446	NVE15227	647	666	656	10	1	9	Yes	AUACG-CGCCAUAAGAAAAAA	:.: : :: ::::::::::::	UGUACUGCUGUAUUCUUUUUU	4.5	17.5	3594
miR-2022	NVE7280	294	316	306	10	3	7	Yes	AGAGUAGAAGAGCAACUAGCAAA	: : ::.:::::::::::::	CGCCCUGUUUUCGUUGAUCGUUU	5.5	17.5	1053
miR-2024g	NVE579	1370	1392	1382	10	8	2	Yes	UAACAAUAUCGGUGCCGUGUUC	: :::::::::::.: :::::	AGUGUUAUAGCCAUGACACAAU	5	18.5	2355
miR-2042	NVE8465	899	920	910	10	6	4	Yes	GUA-UUCAAGGUUGAUUUGUAU	::: : ::::: ::::::.::	CAUCACGUUCCUACUAAAUAUU	6	17.5	1590
miR-2050	NVE10642	615	635	625	10	5	5	Yes	AACCAGG-CUUAGCAAUCAGAU	::::::. : .::::::::.::	UUGGUCUAGUGUCGUUAGUUUA	5.5	18.5	1207
miR-2041bstar	NVE2735	106	126	116	9	7	2	Yes	AUGUGAGA-AAAAAUAUUUUUG	:.:: ::: :::::::....::	UGCAAUCUCUUUUUAUGGGGAC	6.5	17.5	787
miR-9428star	NVE20059	347	367	357	9	5	4	Yes	UCGAACAUGUGGACAUAUGUU	: :::::::::::::::::::	AUCUUGUACACCUGUAUACAA	1	20	545
miR-9434	NVE9870	938	960	950	9	4	5	Yes	CAGAAGCCAGAAGUCCUGUCAGA	:::::::::::: ::::::::::	GUCUUCGGUCUUAAGGACAGUCU	2	22	2005
miR-9447	NVE17350	2372	2393	2383	9	5	4	Yes	GCAGACGAAGGAAUUUGAAUCG	:::::: :.::: :::::::	CGUCUGACUUCUUCCACUUAGC	7	17.5	2797
miR-9452	NVE5882	3129	3150	3140	9	1	8	Yes	UUUCUUGGAUGUUUCA-CUAGCA	::: ::: : ..:::: ::::::	AAACAACGUUUGAAGUAGAUCGU	7	18	3500
miR-2024a	NVE11135	999	1022	1012	9	8	1	Yes	UAACAAUAUCGGUGUUGUGUUC	: :::::::::::..:::::	AGUGUUAUAGCCAUGACACAUU	6	18	3326
miR-2024g	NVE5581	1980	2002	1992	9	6	3	Yes	UAACAACAUCGGUGCUGUGUUC	: :::: ::::::.:::::::	AGUGUUAUAGCCAUGACACAAU	4	18.5	4309
miR-9418	NVE12493	454	477	467	8	3	5	Yes	GAGUCAGUUUAUGUUGAUGCAAUU	::. :::::. ..:::::::: ::	CUUUGUCAAG-GUAACUACGUGAA	7	19	1277
miR-9421star	NVE22567	1711	1731	1721	8	4	4	Yes	AAUGUUAU-UCUACCAAUUAUG	::: :. : ::::::: :::::	UUAAAGCAUAGAUGGUAAAUAC	5.5	17.5	2692
miR-9426	NVE947	748	769	759	8	6	2	Yes	CUUUCAAAGCCCCCAAACUCUU	:::::::::::: :::::::::	GAAAGUUUCGGGAGUUUGAGAA	2	21	4844
miR-9450	NVE8084	1188	1209	1199	8	5	3	Yes	CACAUUAAUUUAUAAAGAAUAU	: ::.: :::: :::::::: :	GGGUGACUAAAGAUUUCUUAGA	6.5	17.5	1509
miR-2022	NVE16498	4067	4089	4079	8	5	3	Yes	CACCGACAAAAGCAACUAGCAAA	:::::::::::::::::::	CGCCCUGUUUUCGUUGAUCGUUU	4	19	7888
miR-2023	NVE3625	1383	1402	1392	8	4	4	Yes	CCCUGUCACUUGU-UUUCUGU	::::..::::::: .:::: :	GGGAUGGUGAACAUGAAGAAA	6	17.5	1811
miR-2025	NVE6320	2007	2027	2017	8	5	3	Yes	GUAAC-ACCGCGGGCUAAAGAA	..::: ::::::::::::.::	UGUUGAAGGCGCCCGAUUUUUU	4	18.5	2295
miR-2028star	NVE22400	298	319	309	8	8	0	No	AUUGGAGCU-CUGCUAUUUCUUA	::.. ::: :::::: :::.::	GAAUUACGAGGACGAUCAAGGAU	7	17.5	848
miR-2047star	NVE24745	402	423	413	8	0	8	No	AAUUCGCUGAGAAGAUGAUGGG	:::::::.::: ::::: .::.	UUAAGCGGCUCGUCUACAGCCU	6	18.5	667
miR-9412star	NVE19984	1639	1661	1651	7	6	1	Yes	UCAUACAGCUUACUUCAAGACGU	:: ::: : :. :::::::::.:	AGGAUGACAAGAGAAGUUCUGUA	7	18	2215
miR-9412star	NVE25009	1508	1531	1521	7	6	1	Yes	ACUAGAUGUUCUCUUCGAGACAA	:. . ::::::::::.:::::	AGGAUGACAAGAGAAGUUCUGUA	6	17.5	1616
miR-9419	NVE11101	1852	1872	1862	7	5	2	Yes	AAGACUCAUGCAU-UUCAAGGA	::.: ::: :::: ::::::.:	UUUUAAGUUCGUAGAAGUUCUU	5.5	18	2058
miR-9421	NVE6052	40	61	51	7	3	4	Yes	UGCAUUAUGGGCAGAUAUGUAA	:::::: ::::::::.:.::	UCGUAAUUACCGUCUAUGCGUU	5	18	1247
miR-9436	NVE13040	2264	2283	2273	7	3	4	Yes	ACAUACAGA-AUCUGCCUCAA	:::::::.: :: ::: ::::	UGUAUGUUUGUAAACGCAGUU	6.5	17.5	3214
miR-9446	NVE18715	878	900	890	7	5	2	Yes	CUAUGGACGAUAUAAGAAGAAU	.:: :::::.:::::::.::	UGUA-CUGCUGUAUUCUUUUUU	5.5	17.5	991
miR-9412star	NVE16955	20	42	32	6	4	2	Yes	UUCUAAGGUUCUCUUCAA-ACAA	:.::: ::::::::::: :::	AGGAUGACAAGAGAAGUUCUGUA	5.5	18.5	357
miR-9422star	NVE13522	1451	1472	1462	6	4	2	Yes	CUGAAGGCAAACUUGACAAGUU	:::: :: :::::::: : :.:	GACUGCC-UUUGAACUUUGCGA	7	17.5	2285
miR-9434	NVE9794	2292	2314	2304	6	1	5	Yes	CAGGAGCCGGAUUUCUUCUCAGA	:::.::::.:: :::.: :::::	GUCUUCGGUCUUAAGGACAGUCU	6	19.5	2568
miR-2036	NVE16024	838	861	851	6	1	5	Yes	UACGAUAUGUAGUCUUACAAAAUA	:::::: : :::: ::::: :::	AUGCUACUC-UCAGCAUGUUAUAU	7	19	4839
miR-9437	NVE17668	72	93	83	6	6	0	No	GAGCUGAAU-AGACUCGCGUUAA	::.:.: :: ::: :: ::::::	CUUGGCAUAGUCUAAGAGCAAUU	7	18	922
miR-9468	NVE8152	2800	2823	2813	6	0	6	No	GUUUCACG-UCAAUGUACACUCA	.:.:::: .:::::::::::	GGAGGUGCUGGUUACAUGUGAAG	6.5	17.5	3020
miR-9417	NVE20769	5473	5496	5486	5	3	2	Yes	AUGCCUUGCGCGAUGCGUUCUUU	: .::.::: ::::.::::::.	UCUGGGACG-GCUAUGCAAGAGU	6	18	5713
miR-9428star	NVE23007	4476	4496	4486	5	1	4	Yes	UCGAACAUGUGGACAUAUGUU	: :::::::::::::::::::	AUCUUGUACACCUGUAUACAA	1	20	4762
miR-9445	NVE17350	1963	1983	1973	5	3	2	Yes	AGGAAAAAUGAGCGACACAGA	:.: :::.::::::::::::	UUC-AUUUGCUCGCUGUGUCU	3.5	18	2797
miR-2047star	NVE13578	448	468	458	5	3	2	Yes	AGUUGGCCCAGCAGAU-UCAGA	:.:: ::: ::::::: :: ::	UUAAGCGGCUCGUCUACAGCCU	6.5	17.5	1767
miR-2047star	NVE12207	2167	2190	2180	5	0	5	No	ACUUCUCCAAGUAUGAUGUCGGC	: ::: :: ::.: ::::::::	UUAAGCGGCUCGU-CUACAGCCU	7	17.5	4340
miR-2047star	NVE22446	244	266	256	5	5	0	No	AGUUCACUGAAGAAGAUGUCCGA	:.::: :.: :: ::::::: ::	UUAAGCGGC-UCGUCUACAGCCU	7	18	473
miR-9416star	NVE14227	2277	2299	2289	4	3	1	Yes	GCGUCAAGCAUGACGAGAUGUCG	::.: ::::. :::::::::::	CGUA-CUCGUGAUGCUCUACAGC	5.5	19	2490
miR-9417	NVE19	1101	1123	1113	4	2	2	Yes	AGGACUUGACCGAGACGUUCGCA	::. :.:: :::: :::::: ::	UCUGGGAC-GGCUAUGCAAGAGU	7	18	1894
miR-9424b	NVE8800	786	805	795	4	3	1	Yes	UGCCUCGGUAGACCA-CAUUA	:::::::.::.:::: : :::	ACGGAGCUAUUUGGUCGAAAU	5.5	18	1330
miR-9436	NVE25406	479	498	488	4	1	3	Yes	AUAUACAAAGAUUU-UGUCAA	:.::::::: :::: .:::::	UGUAUGUUUGUAAACGCAGUU	5.5	18	872
miR-9449	NVE20201	704	724	714	4	1	3	Yes	GUGAUGAAAGUUU-UGGAGAUG	..:::::: :::: ::::::.	UGCUACUUACAAAUUCCUCUAU	6.5	17.5	1034
miR-2022	NVE16448	2919	2941	2931	4	2	2	Yes	AGGGGCCAACAGCAACUAGCAAA	::: ::: :::::::::::::	CGCCCUGUUUUCGUUGAUCGUUU	4	19	3678
miR-2024g	NVE11134	594	616	606	4	1	3	Yes	UAACAACAUCGGUGCUGUGUUC	: :::: ::::::.:::::::	AGUGUUAUAGCCAUGACACAAU	4	18.5	1095
miR-2030	NVE19315	24074	24094	24084	4	3	1	Yes	AUCUCUUACAAUGUUACGCUA	:::::::::::::::: ::::	UAGAGAAUGUUACAAUACGAU	2	20	34045
miR-2030	NVE3835	1089	1109	1099	4	3	1	Yes	AUGUCUUUCAGUGUUAUGCUA	:: :::: ::.::::::::::	UAGAGAAUGUUACAAUACGAU	3	18.5	1309
miR-2031star	NVE6168	5209	5232	5222	4	1	3	Yes	AAAUGGCAUGCUUAUUUGUGGUC	: :.::::. : :::::.::::	UAUGCCGUGAG-AUAAAUACCAU	7	17.5	5717
miR-2047star	NVE2414	2575	2597	2587	4	2	2	Yes	AAGGCGCACAAGUAGAUAUCGGA	:: ::: : ::.:::: :::::	UUAAGCG-GCUCGUCUACAGCCU	7	17.5	2728
miR-2050	NVE814	700	720	710	4	1	3	Yes	AACCCGAUGAC-CCAAUCAGAU	:::: ::: :: ::::::.::	UUGGUCUAGUGUCGUUAGUUUA	7	17.5	1040
miR-2051	NVE24911	4728	4748	4738	4	2	2	Yes	GAUAAAGAAGGGACUCCGGUA	::.: ::::..::::::::::	CUGUGUCUUUUCUGAGGCCAU	3.5	18.5	8533
miR-2051	NVE561	312	333	323	4	1	3	Yes	UACGACAAAAAAGACUUCGUUA	:: ::: ::::::::.:: ::	CUG-UGUCUUUUCUGAGGCCAU	6	17.5	1366
miR-2043bstar	NVE23296	764	784	774	4	3	1	Yes	UUAGUAUC-UCAUUUGAGGUCA	.::.::.: :: ::::::: ::	GAUUAUGGCAGAAAACUCCCGU	6.5	17.5	1452
miR-9419	NVE20682	134	156	146	4	0	4	No	AAGAAUAAAGCAUACUUCAAGCG	::.: : :::::: ::::::: .	UUUUAAGUUCGUA-GAAGUUCUU	7	18	1045
miR-2022	NVE23326	20	42	32	4	0	4	No	UCAGGAAAGAAGAAAUUAGCAAA	: ::: :.::: ::.:::::::	CGCCCUGUUUUCGUUGAUCGUUU	6.5	18	1575
miR-2043astar	NVE23869	1146	1167	1157	4	4	0	No	AAAAGUGGC-UUUUUUGAGGGUA	:: :.:. : :.:::::::::::	HNAUUAUGGCAGAAAACUCCCAU	5	18.5	3542
miR-2051	NVE19017	1476	1495	1485	4	4	0	No	GACACAGCGAAGAC-CCGGUA	::::::: .::::: ::::::	CUGUGUCUUUUCUGAGGCCAU	4	18.5	2513
miR-9419	NVE13339	307	327	317	3	1	2	Yes	AAAAUUGAAGUA-CUUUAUGAA	:::::: :::.: :::.: :::	UUUUAAGUUCGUAGAAGUUCUU	7	18	3424
miR-9419	NVE20015	840	860	850	3	1	2	Yes	CGGAUUCAAGUAUC-UCAACAA	..:::::::.::: :::: ::	UUUUAAGUUCGUAGAAGUUCUU	7	17.5	1568
miR-9423	NVE1799	921	943	933	3	1	2	Yes	CA-UAUUUGUUCAUACGUACUAA	:: :: :: :::::::: ::.:	GUCAUCAAGAAGUAUGCCUGGUA	7	17.5	1125
miR-9428star	NVE24794	3947	3967	3957	3	2	1	Yes	UCGAACAUGUGGACAUAUGUU	: :::::::::::::::::::	AUCUUGUACACCUGUAUACAA	1	20	4241
miR-9424b	NVE22160	680	701	691	3	1	2	Yes	UGCCUCAGCUAAGGAAGCUUUA	:::::: : :::. :::::::	ACGGAG-CUAUUUGGUCGAAAU	7	17.5	913
miR-9446	NVE21172	360	381	371	3	2	1	Yes	AUGUGACAGACAGGAGAGGAAA	:..:::: :::: .:::..:::	UGUACUG-CUGUAUUCUUUUUU	7	17.5	784
miR-9449	NVE19483	3075	3097	3087	3	2	1	Yes	AUGAUCAGGAGUUUAAGAAGAUG	:.::: : . ::::::: ::::.	UGCUACU-UACAAAUUCCUCUAU	6.5	17.5	5147
miR-9449	NVE6440	1445	1465	1455	3	2	1	Yes	ACGAAGACUG-UUGACGAGAUA	:::: :: :: ::.: ::::::	UGCUACUUACAAAUUCCUCUAU	7	17.5	3979
miR-9457	NVE9918	641	663	653	3	1	2	Yes	AGCAGUUAGUCUUAGAAAGUGCA	:::: :: :::::::: ::: :	UCGUGAA-AAGAAUCUUACACAU	7	18	1078
miR-9468	NVE2777	1806	1829	1819	3	1	2	Yes	UCUGCACGGCCAAUGUUCAUUGUC	.:: ::::.::::::: ::.: ::	GGAGGUGCUGGUUACAUGUGA-AG	7	19.5	2028
miR-2025	NVE10357	579	601	591	3	1	2	Yes	CCAGCUUCCGUGGGCAUAAAACA	::.::::::.:::: ::::: :	UGUUGAAGGCGCCCG-AUUUUUU	6.5	19	2147
miR-2026	NVE26175	844	865	855	3	2	1	Yes	UUCAUCCUUUGAACAUUUGAAA	:.:::: : : ::::::::::	AGGUAGUCAUC-UGUAAACUUU	6.5	17.5	1183
miR-2028star	NVE3856	693	715	705	3	2	1	Yes	UAUGAUGAUCCUGGUCGUUCCUA	. :.::: ::::: : :::::::	GAAUUACGAGGACGAUCAAGGAU	7	18	1707
miR-2030	NVE26192	151	172	162	3	2	1	Yes	AGCCCUUGGAAUGUUGAUGCUA	: : :::. :::::: ::::::	UAGAGAAUGUUACAA-UACGAU	5.5	17.5	1554
miR-2038	NVE17387	5182	5203	5193	3	2	1	Yes	UUAUCAUUAUGACAUUUAGUGU	:.::::: ::::::: :: ::	AGUAGUACCACUGUAAUUC-CA	6.5	17.5	5386
miR-2047star	NVE16342	2038	2061	2051	3	2	1	Yes	AAUUCUUCGAGCCGAUUGUCGGC	::::: .::::: :: ::::::	UUAAGCGGCUCGUCU-ACAGCCU	6.5	18.5	2822
miR-2050	NVE18272	611	631	621	3	2	1	Yes	AACCA-UUCACACCAAUCAACU	::::: ::::: ::::::: :	UUGGUCUAGUGUCGUUAGUUUA	6	18	1149
miR-9412star	NVE14222	614	637	627	3	0	3	No	GUCUAUUGUGGUCUUCACAGAUAU	.:::.::: :::::: :::.::	AGGAUGACAAGAGAAGU-UCUGUA	7	18.5	779
miR-9419	NVE14945	245	265	255	3	3	0	No	CAAAUUCAAGAAU-UUAAAGAA	::::::::: :: :: :::::	UUUUAAGUUCGUAGAAGUUCUU	7	18	696
miR-9422star	NVE8615	79	100	90	3	0	3	No	CUCGCGCGAAAUUUGAGGCGCU	:: .:: ::::.::::..::::	GACUGC-CUUUGAACUUUGCGA	5.5	18	5276
miR-9426	NVE8079	718	742	732	3	0	3	No	CUUGCGCAGGCCCUCAAACUUGA	::: :. :.:::::::::::.	GAAAGU-UUCGGGAGUUUGAGAA	7	17.5	1432
miR-9432	NVE14915	960	980	970	3	3	0	No	CCU-CAUGUCCUUUGGAUAUUC	::: :: .:::::.:: :::::	GGAGGUUUAGGAAGCCAAUAAG	5.5	18	1236
miR-9436	NVE322	3538	3559	3549	3	0	3	No	AUAGGACGAACAUUUUUGUCAA	:.: ::.::::::: .:::::	UGU-AUGUUUGUAAACGCAGUU	6	17.5	3815
miR-9436	NVE9236	1995	2015	2005	3	3	0	No	AUGUACAAAGAUUUACGUCAA	:..:::::: :::: ::::::	UGUAUGUUUGUAAACGCAGUU	5	18	3177
miR-9437	NVE3472	33322	33343	33333	3	0	3	No	AGACCGUG-CAGAUUCUUAUUGA	.:::::. ::::::::. ::.:	CUUGGCAUAGUCUAAGAGCAAUU	7	18	35619
miR-9446	NVE16756	10	31	21	3	3	0	No	ACAAUGACAACGAAAAAAAAAA	:: ::::: ::. :: ::::::	UG-UACUGCUGUAUUCUUUUUU	7	17.5	1532
miR-9446	NVE18324	691	710	700	3	3	0	No	ACAUGAAGA-AUAAGAACAAG	:::::: :: ::::::: ::.	UGUACUGCUGUAUUCUUUUUU	5.5	17.5	1658
miR-9450	NVE2230	1233	1253	1243	3	0	3	No	UCCAUUUAUUUC-AAAGGAGCU	.:::.: ::::: ::::.: ::	GGGUGACUAAAGAUUUCUUAGA	7	17.5	1499
miR-9451	NVE1449	2194	2216	2206	3	3	0	No	UUCCUGUCAAUUUGAGACUCGC	:::::::::::::::::::::	AAGGACAGUUAAACUCUGAGCA	1	21	2543
miR-9458	NVE9157	1953	1973	1963	3	3	0	No	CCCCUUCAAUUUUUG-UUGCGU	::: .:: ::.:::: :.::::	GGGAGAGGUAGAAACGAGCGCA	6.5	17.5	2346
miR-9459	NVE19786	1855	1877	1867	3	0	3	No	AUUCUUGUGGUCAUUGAGCCUUU	::.::: ::::: ::::: :.::	UAGGAA-ACCAGCAACUCAGGAA	6.5	19	4297
miR-9468	NVE8852	690	711	701	3	3	0	No	GCGUGACGGCCAAUGU-CACUUC	: . :::.::::::: ::::::	GGAGGUGCUGGUUACAUGUGAAG	6	18	1117
miR-9422	NVE11185	755	775	765	3	3	0	No	UGAUCGUUUCUAUCUU-GGUCA	: : ::.::::::::: ::::	AGUCGCGAAGAUAGAAGACAGU	6.5	17.5	981
miR-2022	NVE16498	1160	1182	1172	3	0	3	No	AUGGGAGAAAAGCAACUAGCACA	.:::: :::::::::::::: :	CGCCCUGUUUUCGUUGAUCGUUU	4.5	19.5	7888
miR-2038	NVE9619	638	659	649	3	3	0	No	UCUUUAUGGUGAUAUUUCAGGU	:: :.:::::::.: :: ::::	AGUAGUACCACUGU-AAUUCCA	6.5	18	987
miR-2047star	NVE2058	1121	1141	1131	3	3	0	No	AAUUUGCUGA-UGAAUGUCGGA	::::.::.:: .. ::::::::	UUAAGCGGCUCGUCUACAGCCU	7	18	1653
miR-2050	NVE1944	812	833	823	3	3	0	No	GUCUAGAU-ACAGCAGUCAAAC	. :.:::: ::::::.:::::	UUGGUCUAGUGUCGUUAGUUUA	5	17.5	1137
miR-9413	NVE20941	1933	1955	1945	2	1	1	Yes	AUCUUGCAAUUAGAUCACGUUUG	:.:::.: :.: :::::: :::.	UGGAAUGGUGA-CUAGUGAAAAU	7	18	2129
miR-9417	NVE5009	1483	1505	1495	2	1	1	Yes	GGAUCAUGCUGAUAUCGUUGUCG	.::.: :::.:::: :::: ::.	UCUGGGACGGCUAU-GCAAGAGU	7	18	2302
miR-9419	NVE20856	1153	1175	1165	2	1	1	Yes	AAGAUUCUAAAUUUCUUCAAGAA	::.:::: :: . ::::::::::	UUUUAAG-UUCGUAGAAGUUCUU	6.5	19	1404
miR-9419	NVE2336	2202	2225	2215	2	1	1	Yes	AAAAUUUACAGUAUCGUCAAGGU	::::::.: ::.::: :::::.	UUUUAAGU-UCGUAGAAGUUCUU	6.5	18.5	3906
miR-9421star	NVE13566	847	868	858	2	1	1	Yes	AAUGUUGAAUUUAUGAUUUAUG	::: :.: ::.::. :::::::	UUAAAGCAUAGAUGGUAAAUAC	6.5	17.5	1033
miR-2041bstar	NVE10187	4269	4290	4280	2	1	1	Yes	ACGAAAGAGGAAAAUACUUAUG	::: ::::.:::::::.. ::	UGCAAUCUCUUUUUAUGGGGAC	7	17.5	6357
miR-9424a	NVE20747	805	827	817	2	1	1	Yes	AGUGCCACCAUGGGCCAACUAUA	: :::: : :::.::::::::::	UGACGGAGCUACUCGGUUGAUAU	4	19.5	977
miR-9432	NVE11717	699	720	710	2	1	1	Yes	CCGCCAGAACUUUGGGUUAUUC	:: :::.: :.:: ::::::::	GGAGGUUUAGGAAGCCAAUAAG	5.5	18	914
miR-9432	NVE9547	3102	3123	3113	2	1	1	Yes	CAUCCCAAUCCUUCAGUCAUUC	: ::: :::::::: :: ::::	GGAGGUUUAGGAAGCCAAUAAG	6	18	4911
miR-9434	NVE23709	230	251	241	2	1	1	Yes	CAG-AGUGGAAAUUACUGUCGGA	::: ::. . :::: :::::.::	GUCUUCGGUCUUAAGGACAGUCU	7	17.5	1192
miR-9434	NVE7536	983	1005	995	2	1	1	Yes	CAAAGGUCA-AAUUUCUGUCUGU	:: :.:.:: ::::.::::: :	GUCUUCGGUCUUAAGGACAGUCU	7	17.5	1624
miR-9435	NVE19351	86	107	97	2	1	1	Yes	GAUG-UAGAUUCAUUUGGCAAGA	:.. ::::: ::.:::.:::::	GUGUGAUCUAUGUGAACUGUUCU	7	18	912
miR-9440	NVE3076	447	468	458	2	1	1	Yes	CAGGUUCCCCUUCUCG-UGAUUG	:::::: : .::::: :::::.	GUCCAACUGUGAGAGCAACUAAU	6.5	18	1629
miR-9440	NVE381	46485	46509	46499	2	1	1	Yes	CAGGCUCAUGUCCCUCGUUGAUUC	:::: : :.. : ::::::::::	GUCCAACUGU-GAGAGCAACUAAU	7	18	63031
miR-9446	NVE8167	1338	1358	1348	2	1	1	Yes	ACAUAACAACAUAAGAAAAAA	:::: :: :::::::::::::	UGUACUGCUGUAUUCUUUUUU	2	19	4156
miR-9447	NVE20686	1904	1924	1914	2	1	1	Yes	GCAGA-UGAGGAAGGUGAGAAG	::::: :::.::::::::. :	CGUCUGACUUCUUCCACUUAGC	7	18	2449
miR-9449	NVE7297	2644	2666	2656	2	1	1	Yes	UCGAUGCCGUGCUUGAGGAGAUG	::::: .:: ::.:::::::.	UGCUAC-UUACAAAUUCCUCUAU	7	17.5	14912
miR-9461	NVE11021	2802	2824	2814	2	1	1	Yes	UGGAUUUUGCCGCUGACAAUCUG	::: :::::::.::: :: .:::	ACC-AAAACGGUGACAGUAGGAC	7	19	4099
miR-9465	NVE14564	2063	2083	2073	2	1	1	Yes	CUCUCAUGUUCC-GCCAUUCAA	:::::: .:::: ::::.:::	GAGAGUUUAAGGAGGGUAGGUU	6.5	18	2778
miR-9467	NVE1900	338	359	349	2	1	1	Yes	CCCGAGGGUUGUG-AAGAAAAUG	: : ::::. ::: :::::::::	GAGGUCCCGCCACAUUCUUUUAC	5.5	18.5	824
miR-2022	NVE13092	364	387	377	2	1	1	Yes	GAGGGAUCAACAGCAACUAAGAAA	: :::: ::: :::::::: :::	CGCCCU-GUUUUCGUUGAUCGUUU	7	19	1715
miR-2024a	NVE11137	736	758	748	2	1	1	Yes	UUAUGGUAUCGGUGCUGUGUAC	:.:...:::::::.:::::::	AGUGUUAUAGCCAUGACACAUU	4	18.5	2531
miR-2024estar	NVE19961	381	403	393	2	1	1	Yes	CUUUACCCAACGUCAAUGCUGCU	::: :::: ::.::::.:: ::	AAAACGGGUCGCGGUUAUGA-GA	7	18	1042
miR-2024g	NVE579	1130	1152	1142	2	1	1	Yes	UCACAAUAUCGGUGAUGUGUUC	:::::::::::::. ::::::	AGUGUUAUAGCCAUGACACAAU	4	19.5	2355
miR-2043astar	NVE22586	112	133	123	2	1	1	Yes	AGUAA-AUAGUAUUUUGAGGGAA	::::: :. :: ::::::::: :	HNAUUAUGGCAGAAAACUCCCAU	6.5	18.5	357
miR-2043astar	NVE24235	835	857	847	2	1	1	Yes	AUUUGUAUUGUCUAUUGAGGAUA	::: .::..:::: :::::: ::	HNAUUAUGGCAGAAAACUCCCAU	6.5	18.5	1264
miR-2047star	NVE2596	751	771	761	2	1	1	Yes	ACUUCGUCCAGCUGAUGU-GGA	: ::::.: ::: ::::: :::	UUAAGCGGCUCGUCUACAGCCU	6.5	17.5	1278
miR-9412	NVE25093	442	466	456	2	2	0	No	UAGCUCCCAAGUUUUUAGCAUUUC	: :: :: :::.:::::::::.	ACAGAAGG-UCAGAAAUCGUAAGU	7	18	621
miR-9415	NVE16603	1612	1635	1625	2	0	2	No	GUCUCCUGUGUCAGUUAUAGUAA	..::::.:.::::: :: ::::	UGGAGGGCGCAGUCCAU-UCAUA	7	18	2558
miR-9416	NVE17881	1561	1582	1572	2	0	2	No	CACCACAGUUUAUA-UGUUCUA	::: :::.::: :: ::::::	GUGCUGUUAAACAUCACAAGAA	6.5	17.5	1927
miR-9416	NVE4733	636	659	649	2	0	2	No	CAAGAACUAUUUGUAGUGGUCUG	:: : :: :::::::::: :::	GUGC-UGUUAAACAUCACAAGAA	6	18	1074
miR-9416star	NVE25461	623	646	636	2	2	0	No	GUCUGAGCAUUACGAGAAAGUCA	:. ::::::.:::::: : :::	CGUACUCGUGAUGCUC-UACAGC	7	18	2856
miR-9419	NVE2019	1325	1347	1337	2	0	2	No	GACAUUCCAGCAUCUUCUAGAC	.: :::: ::::::::: :::	UUUUAAGUUCGUAGAAGUUCUU	5.5	17.5	1777
miR-9421	NVE17589	1540	1562	1552	2	0	2	No	UUUAUUUAAUGGUAGAUACGCGG	.: :::::::.::::::::..	UCGU-AAUUACCGUCUAUGCGUU	6	18	2025
miR-9421	NVE25772	1370	1390	1380	2	2	0	No	GGUA-UGAUGGAAGGUAUGCAA	.:.: :.:::: ::.::.::::	UCGUAAUUACCGUCUAUGCGUU	6.5	17.5	1726
miR-2041bstar	NVE12539	890	910	900	2	0	2	No	AC-UCAGAGAAAAUUGCCCAUG	:: : :::::::: :.::: ::	UGCAAUCUCUUUUUAUGGGGAC	7	17.5	1501
miR-2041bstar	NVE2414	1395	1415	1405	2	2	0	No	AC-UUAGAGAAGAAGAUCCAUG	:: ::::::::.:: :.:: ::	UGCAAUCUCUUUUUAUGGGGAC	7	18	2728
miR-9424a	NVE13222	996	1020	1010	2	0	2	No	AGGGCACAUAAUGAGCCAACUAUC	: :: : . :::::::::::::	UGACG-GAGCUACUCGGUUGAUAU	6.5	17.5	1141
miR-9424a	NVE5490	3597	3619	3609	2	2	0	No	CUUGGGACGAUGAGCCAACCAUA	.:: :::::::::::: :::	UGACGGAGCUACUCGGUUGAUAU	6.5	17.5	6815
miR-9425	NVE11333	1737	1758	1748	2	2	0	No	UGAGUCUGUUUUGGGUGAUGUU	: :: ::.::::::::: : ::	AGUC-GAUAAAACCCACAAGAA	6.5	17.5	2356
miR-9434	NVE12208	187	209	199	2	2	0	No	CUGAAGCUGGAAAUCCUGACAGA	: :::::..::: ::::: ::::	GUCUUCGGUCUUAAGGACAGUCU	6	19	1230
miR-9434	NVE22381	202	223	213	2	2	0	No	CGCACGCU-GAGUUUCUGUCAGA	:. : ::. ::.::.::::::::	GUCUUCGGUCUUAAGGACAGUCU	6	18	433
miR-9434	NVE358	7606	7627	7617	2	0	2	No	CAGAAGACACAAAUUCUGU-AGA	:::::: :: :: :.:::: :::	GUCUUCGGUCUUAAGGACAGUCU	7	18.5	16167
miR-9434	NVE796	2193	2214	2204	2	0	2	No	CAGUAUUUAGAGUUCCUGU-GGA	::: : ..:::.::::::: .::	GUCUUCGGUCUUAAGGACAGUCU	7	18	5507
miR-9435	NVE191	952	973	963	2	0	2	No	UAUAAUAGAUACA-UUAACAAGG	.:.: :::::::: :: :::::.	GUGUGAUCUAUGUGAACUGUUCU	6.5	18.5	1437
miR-9435star	NVE18629	1683	1704	1694	2	2	0	No	UCACUUGU-ACUUGUCUCUAGUA	:::. :: :: :::::::::.:	CGUGGUCAGUGCACAGAGAUCGU	6.5	18	1907
miR-9436	NVE11511	1550	1569	1559	2	0	2	No	ACA-ACAAGCAUUUCCGUCGA	::: ::::.::::: ::::.:	UGUAUGUUUGUAAACGCAGUU	5	18	2266
miR-9436	NVE23108	1054	1074	1064	2	0	2	No	AUAUACAUAAGUUUGCGUUAA	:.::::: : .:::::::.::	UGUAUGUUUGUAAACGCAGUU	5.5	17.5	3874
miR-9437	NVE23006	159	180	170	2	0	2	No	AAGCUG-CUCAGUUUCUUGUUAA	:.:.: :::: ::::.:::::	CUUGGCAUAGUCUAAGAGCAAUU	7	17.5	7588
miR-9438	NVE16927	515	537	527	2	2	0	No	AACUGAGAGACUUGUGUCGUAA	:: .:::: :::::::: :::	UUAGCUCUGUGAACACAUCAUA	5.5	17.5	798
miR-9438	NVE190	1334	1354	1344	2	0	2	No	GGUCGGGACACUU-UCUAGUGU	..:::.::::::: : ::::.:	UUAGCUCUGUGAACACAUCAUA	6.5	18	1816
miR-9444	NVE23392	280	300	290	2	2	0	No	AGAAGGUCGGCGAUUG-UCGUG	::: ::: :::: ::: ::::.	UCUCCCAACCGCCAACAAGCAU	6.5	17.5	538
miR-9445	NVE3513	1925	1943	1933	2	0	2	No	AAGUAAA-GAGCCACACGGA	::::::: :::: ::::.::	UUCAUUUGCUCGCUGUGUCU	5	17.5	2490
miR-9446	NVE10150	1491	1512	1502	2	2	0	No	GGAUGAUGACGAUGAGAAAAAA	. ::::.::: ::.::::::::	UGUACUGCUG-UAUUCUUUUUU	5	18.5	3716
miR-9446	NVE13123	1716	1736	1726	2	2	0	No	ACAUGAAGAGAAAAGGAAAAA	:::::: :: : :::.:::::	UGUACUGCUGUAUUCUUUUUU	6	17.5	4767
miR-9446	NVE16002	5360	5380	5370	2	0	2	No	ACAUGACGAUAGGAGAGAAAG	:::::::::.: .:::.:::.	UGUACUGCUGUAUUCUUUUUU	5.5	18	10174
miR-9446	NVE23698	2820	2839	2829	2	2	0	No	ACAUGACGAU-UGAGAAAGAA	:::::::::. :.:::::.::	UGUACUGCUGUAUUCUUUUUU	5	18.5	3483
miR-9446	NVE26022	93	114	104	2	2	0	No	ACAAGAUGACGUGAAGAACAAA	::: ::.:::.: ::::: :::	UGUACUGCUGUA-UUCUUUUUU	6.5	18	2005
miR-9446	NVE7605	229	250	240	2	0	2	No	AUAUGGCGGCGUAGAGAAAUAA	:.:::.::.:.:: ::::: ::	UGUACUGCUGUAU-UCUUUUUU	6.5	18	1084
miR-9447	NVE13326	62	82	72	2	2	0	No	GCAGAC-GAAGAAGACGAACCG	:::::: ::::::: ::: ::	CGUCUGACUUCUUCCACUUAGC	7	18	411
miR-9447	NVE4500	976	998	988	2	2	0	No	GUACCUUGACAGAGGGUGAAUAG	:.: .::: :::.::::::: :	CGUCUGACU-UCUUCCACUUAGC	7	17.5	1427
miR-9449	NVE1326	2719	2741	2731	2	0	2	No	ACCGUGAUGUGUUCGAGGAGAUG	:: .::: .:::: .:::::::.	UGCUACU-UACAAAUUCCUCUAU	6.5	18	3458
miR-9450	NVE6517	503	525	515	2	2	0	No	GCUACUGUCUUGCUAAAGAGUCU	:.:::: :: :::::::.:::	GGGUGAC-UAAAGAUUUCUUAGA	6.5	18	985
miR-9451	NVE16586	62	84	74	2	0	2	No	UUCCUUUCAAUUUGAGACUCGA	::::: :::::::::::::::	AAGGACAGUUAAACUCUGAGCA	2	20	1431
miR-9451	NVE3771	91	111	101	2	2	0	No	UUCCCGUGAGUUUGCGA-UCGU	:::: :: :.:::: :: ::::	AAGGACAGUUAAACUCUGAGCA	7	17.5	1551
miR-9454	NVE15803	640	661	651	2	2	0	No	GGUCAGAAAUGGUGACAUGGUA	:::.:::..::::: :::::	GGAGUUUUUGUCACUGGACCAU	6.5	17.5	3655
miR-9457	NVE26034	1371	1391	1381	2	2	0	No	AACACUUUUCUU-GAAUUUGCA	: :::::::::: :::: :: :	UCGUGAAAAGAAUCUUACACAU	7	18	2128
miR-9457	NVE2615	1064	1086	1076	2	2	0	No	AGAAUUCUUAUAUAGAGUGUGUA	:: :.: :: : ::::.::::::	UCGUGAAAAGA-AUCUUACACAU	6.5	18	1177
miR-9463	NVE19831	1298	1318	1308	2	2	0	No	AAUGGUAGUUUUGAG-UUUAGU	::. ::::::.:::: ::.:::	UUGACAUCAAGACUCUAAGUCA	5.5	18.5	1709
miR-9464	NVE8514	160	183	173	2	2	0	No	GUAUGCUGUCGAAAAUUUCUCAGA	:: : :::::::: .::::::::	CAAAGAACAGCUUUAGAAGAGUCU	6	19.5	1971
miR-9467	NVE10523	704	727	717	2	2	0	No	CUCGAGGGUGAUGGAAGAAAAGUG	::: ::::.: :: ::::::: ::	GAGGUCCCGCCACAUUCUUUU-AC	6.5	19.5	3878
miR-9422	NVE24815	1116	1137	1127	2	0	2	No	ACAGUGCUUCUACUGUCUGUCG	:::.::::::: . ::::::.	AGUCGCGAAGAUAGAAGACAGU	7	17.5	2514
miR-2022	NVE18870	1782	1804	1794	2	2	0	No	CUGGGACAAAAGCAACAAGCAAA	.:::::::::::::: ::::::	CGCCCUGUUUUCGUUGAUCGUUU	3.5	20.5	2162
miR-2022	NVE23788	4267	4289	4279	2	0	2	No	GAUGGACAAAAGCAACAAGGAAA	: ::::::::::::: :: :::	CGCCCUGUUUUCGUUGAUCGUUU	6	19	4702
miR-2024e	NVE1627	176	196	186	2	2	0	No	UGAGAGUGAUGGUAG-GUGCAA	: :::.:. :::::. ::::::	AGUCUUAUAACCAUUACACGUU	6	17.5	2014
miR-2024estar	NVE7082	658	678	668	2	2	0	No	UUCUGGCCAGCGACAA-GCUCU	:: :: :::::: ::: .::::	AAAACGGGUCGCGGUUAUGAGA	7	17.5	1729
miR-2024g	NVE14675	330	352	342	2	2	0	No	UAACAACAUCGGUUCUGUGUUC	: :::: :::::: :::::::	AGUGUUAUAGCCAUGACACAAU	5	18	2413
miR-2024g	NVE15254	1394	1415	1405	2	2	0	No	CCCUAAUAUCUGUACUAUGUUA	: .:::::: ::::: :::::	AGUGUUAUAGCCAUGACACAAU	6.5	17.5	1718
miR-2025	NVE12721	297	317	307	2	0	2	No	ACAAAAU-GGCGGGCUAAAAAG	:::: : ::::::::::::.	UGUUGAAGGCGCCCGAUUUUUU	4.5	17.5	819
miR-2025	NVE9541	11159	11181	11171	2	2	0	No	AUGACAUCCGGCGCGUUAAAAGA	:..:: ::: ::: :.:::::.:	UGUUGAAGG-CGCCCGAUUUUUU	7	18	13557
miR-2036	NVE2174	496	518	508	2	2	0	No	AGCGACGAAAG-CGUACAAUAUU	.::: :: :: ::::::::::	AUGCUACUCUCAGCAUGUUAUAU	6.5	17.5	1319
miR-2037	NVE11364	1032	1053	1043	2	2	0	No	ACUGAAAAUUUCUUCAAUCACA	:: : ::: :::.::::::::	UGCCAUUUUCAGAGGUUAGUGU	6	17.5	1517
miR-2037	NVE19009	822	842	832	2	0	2	No	AU-GUAAAGGUUUCCAAUUGUG	:. :::::.::.::::::....	UGCCAUUUUCAGAGGUUAGUGU	6.5	17.5	2410
miR-2043astar	NVE12889	1709	1731	1721	2	0	2	No	AAUAGUACCCUCUUUUGGGAAUA	::::.:::: :::::::.: ::	HNAUUAUGGCAGAAAACUCCCAU	6.5	19	2122
miR-2043astar	NVE3888	268	290	280	2	2	0	No	CUUAGCGCC-UCUUUUGGAGGUU	::::. .:: :::::::. :::	HNAUUAUGGCAGAAAACUCCCAU	7	17.5	728
miR-2043astar	NVE9925	627	648	638	2	2	0	No	UAUGAGA-AGUUUUUUGAGGGUG	:::.: : ::.::::::::::.	HNAUUAUGGCAGAAAACUCCCAU	5	18.5	2273
miR-2050	NVE11817	3152	3175	3165	2	2	0	No	GACGAGAUCCCAGUCGAUCAAAC	.:: ::::: ::: :.::::::	UUGGUCUAGUGUC-GUUAGUUUA	6.5	18	4413
miR-2051	NVE12609	165	186	176	2	2	0	No	GACUCAGAAAAGACUCUGAUU	::: ::::::::::::.: :	CUGUGUCUUUUCUGAGGCCAU	5	17.5	2205
miR-2051star	NVE11852	746	767	757	2	2	0	No	AAAGUCGGUAUCUUUUCUAUUU	:::..::: : :::::::::::	UUUUGGCCUUCGAAAAGAUAAA	4	19	875
miR-2051star	NVE23191	1720	1741	1731	2	2	0	No	AAAAUCGCAAGUUUUUCGAUGU	::::.:: :::.::::: :: :	UUUUGGCCUUCGAAAAGAUAAA	6.5	18	2504
miR-9412	NVE1032	1312	1334	1324	1	1	0	No	UCUUUUUCA-UCUUUAGUGUUUU	: :.::.:: :::::::..::.	ACAGAAGGUCAGAAAUCGUAAGU	7	17.5	1907
miR-9412	NVE16440	1950	1972	1962	1	1	0	No	UGACAUAUAGUUUUUAGCAUACA	:: : : .:::.:::::::: ::	ACAGAAGGUCAGAAAUCGUAAGU	6.5	18	2168
miR-9412	NVE25269	3055	3077	3067	1	1	0	No	UUUCUUCCAGUCUUCAAAAUUCA	: :::::::::::: : :::::	ACAGAAGGUCAGAAAUCGUAAGU	7	19	3784
miR-9412star	NVE24816	305	328	318	1	0	1	No	UCCUAUGGUUCUCUUGCUAGAUAU	:::::. :::::::: : :::.::	AGGAUGACAAGAGAA-GUUCUGUA	6.5	20	1281
miR-9412star	NVE25269	1944	1965	1955	1	1	0	No	CCUUAUU-UUCUCUUGAAGAAAU	:.::.: ::::::: :::: ::	AGGAUGACAAGAGAAGUUCUGUA	7	18	3784
miR-9412star	NVE4761	619	643	633	1	1	0	No	UGGGACUGUUUCUCUUGAAGACAC	: :::: ::::::: ::::::	AGGAUGAC-AAGAGAAGUUCUGUA	7	18	1019
miR-9412star	NVE6380	1582	1603	1593	1	0	1	No	UCGCAC-GCUCUCUUUAAGAGAU	:: :: : ::::::.:::: ::	AGGAUGACAAGAGAAGUUCUGUA	7	17.5	1680
miR-9412star	NVE959	340	363	353	1	1	0	No	UUAUCUUGUUUUGUUUCAAGACAU	:. : .::::.: .::::::::::	AGGAUGACAAGA-GAAGUUCUGUA	6.5	19	913
miR-9412star	NVE9914	3280	3304	3294	1	0	1	No	UGGGACUGUUUCUCUUGAAGACAC	: :::: ::::::: ::::::	AGGAUGAC-AAGAGAAGUUCUGUA	7	18	15498
miR-9413	NVE144	760	783	773	1	1	0	No	AUCUUACCAUGUGAUCAUUUGUC	:.:::::::. ::::::.:: :	UGGAAUGGUG-ACUAGUGAAAAU	7	18.5	1354
miR-9413	NVE21381	763	784	774	1	0	1	No	ACCUGUUCAUUGAUUACAUUUA	:::: .::.::::.:: ::::	UGGAAUGGUGACUAGUGAAAAU	6.5	17.5	1988
miR-9413	NVE23980	445	467	457	1	0	1	No	UCCUGACGCAUUGAUUGCUUUUG	::: :: ::.::::..:::::.	UGGAAUG-GUGACUAGUGAAAAU	6.5	18	601
miR-9413	NVE4111	1038	1060	1050	1	0	1	No	ACUGUACCAACUGAUCACUUCCG	::. :::: ::::::::::: .	UGGAAUGG-UGACUAGUGAAAAU	7	18	1363
miR-9413	NVE5350	1006	1027	1017	1	0	1	No	UCCUUAUUACGGAACACUUUUA	:::::..:: :: ::::::::	UGGAAUGGUGACUAGUGAAAAU	6	18	1159
miR-9413	NVE7850	2342	2362	2352	1	1	0	No	ACCAUA-UAUUAAUUACUUUUA	::: :: .:.: ::.:::::::	UGGAAUGGUGACUAGUGAAAAU	6.5	17.5	3760
miR-9413	NVE8438	7	29	19	1	1	0	No	AUUUGGUCACUGUAUUGCUUUUA	:..: ..::::: ::..::::::	UGGAAUGGUGAC-UAGUGAAAAU	7	18	736
miR-9415	NVE22527	1652	1672	1662	1	0	1	No	ACCUUCCUCGUC-GGAAAGUAU	::::.:: :::: :: ::::::	UGGAGGGCGCAGUCCAUUCAUA	5.5	18.5	1738
miR-9416	NVE18195	755	778	768	1	1	0	No	CAUGUGUGAUUUCUAGUGUUUUG	::.: ...:::: :::::::.:	GUGC-UGUUAAACAUCACAAGAA	7	17.5	938
miR-9416	NVE22019	2086	2109	2099	1	0	1	No	CAGGAAAAUUCUGUCGUGUUCUG	:: :: :::: ::: :::::::	GUGCUGUUAA-ACAUCACAAGAA	7	18	2904
miR-9416star	NVE12324	403	425	415	1	1	0	No	GCAUGCGCACUGUGCAGAUGGCG	::::: :::::..: ::::: ::	CGUACUCGUGAUGC-UCUACAGC	7	19	1527
miR-9416star	NVE13087	20350	20370	20360	1	0	1	No	GCAGGCGCACAACGAG-UGUCG	::: : :::: ::::: :::::	CGUACUCGUGAUGCUCUACAGC	6	18	21848
miR-9416star	NVE13639	16	37	27	1	1	0	No	ACAUUGGAAAUACGAGAUGUCG	::: .: : ::::::::::::	CGUACUCGUGAUGCUCUACAGC	5.5	17.5	698
miR-9416star	NVE20128	726	746	736	1	0	1	No	GC-UGAGCACUGCGGUGUGUCG	:: ::::::::.::. .:::::	CGUACUCGUGAUGCUCUACAGC	6	18.5	2106
miR-9416star	NVE20217	2678	2700	2690	1	0	1	No	GUUGGAGCGCUGAUGAGAUGUUG	:. ::::.:: :.:::::::.:	CGUACUCGUGA-UGCUCUACAGC	7	18	2797
miR-9416star	NVE24594	350	372	362	1	0	1	No	CCAUUUUCACUGCGCAGAUGUCG	::: ::::.:: ::::::::	CGUACUCGUGAUGC-UCUACAGC	7	17.5	1338
miR-9416star	NVE7035	2161	2182	2172	1	0	1	No	GGAUGAGCUCCAUGAGAUGUGG	: :::::: : :.::::::: :	CGUACUCGUGAUGCUCUACAGC	7	17.5	5226
miR-9417	NVE11940	1174	1196	1186	1	0	1	No	AGAGCCCGACCGCUACGUGCUCA	::: ::: ::: ::::: ::::	UCU-GGGACGGCUAUGCAAGAGU	7	18	2314
miR-9417	NVE20884	842	864	854	1	0	1	No	AGACAUUUGACGAUUUGUUCUCA	:::: ..:: :::: .:::::::	UCUG-GGACGGCUAUGCAAGAGU	6	18.5	2565
miR-9417	NVE8280	1005	1027	1017	1	1	0	No	GGAGUCUCUCGGAUACGUUCUUA	.:: .:: .: ::::::::::.:	UCUGGGACGG-CUAUGCAAGAGU	6.5	18	1991
miR-9417star	NVE24872	12842	12864	12854	1	1	0	No	AUCCUCAUAGAGUCGUCGGACUC	::::::: :::::: .:: ::::	UAGGAGUCUCUCAG-GGCGUGAG	6	19.5	13192
miR-9417star	NVE5399	3040	3062	3052	1	1	0	No	AUCCUGAGAAGAGUCCCUAACUC	::::: :: :::::::: ::::	UAGGAGUC-UCUCAGGGCGUGAG	6	19	3919
miR-9418	NVE17660	6384	6408	6398	1	0	1	No	GGGCCGGUAAACAUUGAUGCACUG	:.. :.:: ::::::::::::	CUUUGUCA-AGGUAACUACGUGAA	6.5	17.5	6493
miR-9418	NVE610	314	335	325	1	1	0	No	GGAACAGUUCCA-AGAUGUGCUU	:.:::::::::: ::::..:::	CUUUGUCAAGGUAACUACGUGAA	6.5	19.5	2718
miR-9419	NVE12719	3808	3829	3819	1	1	0	No	AACCUUCAAGCAUUUUUAGUAA	:: :::::::::.::.:. ::	UUUUAAGUUCGUAGAAGUUCUU	7	17.5	6984
miR-9419	NVE15038	315	337	327	1	1	0	No	AGAAUUCAAAGUGUUUUUAAGAA	:.::::: :::..:.::.:::::	UUUUAAG-UUCGUAGAAGUUCUU	5.5	19.5	1895
miR-9419	NVE15536	1429	1451	1441	1	1	0	No	GGAGGACGAGCCAUCUUCAGGAA	..:. :.:: ::::::::.:::	UUUUAAGUUC-GUAGAAGUUCUU	7	17.5	2158
miR-9419	NVE17589	701	723	713	1	1	0	No	AAAGCGCUAAACAUUUUCAAGAG	:::. : :: :::.:::::::.	UUUUAAG-UUCGUAGAAGUUCUU	7	17.5	2025
miR-9419	NVE19109	1837	1859	1849	1	0	1	No	UGAAUACAUGCAUCUUCCAAGAA	.::: :: ::::::: ::::::	UUUUAAGUUCGUAGAA-GUUCUU	5.5	18.5	2852
miR-9419	NVE19224	363	383	373	1	1	0	No	GAGAUUCGAG-GUUUUCAGGAG	.:.::::.:: .:.::::.::.	UUUUAAGUUCGUAGAAGUUCUU	7	17.5	1029
miR-9419	NVE19674	183	203	193	1	1	0	No	AGAAUAUAA-CAUCUUCUAGAA	:.::: .:: ::::::: ::::	UUUUAAGUUCGUAGAAGUUCUU	6	18	1725
miR-9419	NVE22040	142	162	152	1	0	1	No	AGAAUUUAUGCAUAUU-AGGAA	:.::::.: :::: :: :.:::	UUUUAAGUUCGUAGAAGUUCUU	7	17.5	1897
miR-9419	NVE2329	860	880	870	1	1	0	No	GGAAGUUGAGCGUC-UCAAGAA	..:: :..:::.:: :::::::	UUUUAAGUUCGUAGAAGUUCUU	6	17.5	2088
miR-9419	NVE23710	5333	5355	5345	1	1	0	No	AGAGUUCACAGCGUCCUCAAGCA	:.:.:::: :::.:: ::::: :	UUUUAAGU-UCGUAGAAGUUCUU	7	18.5	7172
miR-9419	NVE2456	6019	6040	6030	1	0	1	No	CAAAUU-AAGUAUCUUGAAGAU	::::: :::.::::: ::::	UUUUAAGUUCGUAGAAGUUCUU	6	17.5	13988
miR-9419	NVE25325	521	541	531	1	0	1	No	GAAAUGC-AGCACCUUGAAGAA	.:::: : :::: ::: :::::	UUUUAAGUUCGUAGAAGUUCUU	6.5	17.5	968
miR-9419	NVE26076	890	912	902	1	1	0	No	AGAAUGCAAGCAUCUUUAUAGCA	:.::: ::::::::::.: :: :	UUUUAAGUUCGUAGAAGU-UCUU	6.5	19	1999
miR-9419	NVE3099	1163	1185	1175	1	0	1	No	AGACUUUAAUCAUCUUCAAGAC	:.: ::.:: :::::::::::	UUUUAAGUUCGUAGAAGUUCUU	5	18	2909
miR-9419	NVE3181	228	249	239	1	1	0	No	AAACUUCAAGGCUCUUCAAGAG	::: :::::: :::::::::.	UUUUAAGUUCGUAGAAGUUCUU	5.5	18.5	583
miR-9419	NVE3737	571	592	582	1	0	1	No	GAAAUCCAAGCAUCUAUGAGAA	.:::: ::::::::: ..::::	UUUUAAGUUCGUAGAAGUUCUU	5.5	18.5	2113
miR-9419	NVE3786	211	233	223	1	1	0	No	GAAAUUGGAAGUAACUUCAGGAA	.::::: :::.: :::::.:::	UUUUAA-GUUCGUAGAAGUUCUU	6.5	18.5	616
miR-9419	NVE4019	657	677	667	1	1	0	No	CAUGUUCAAGCAU-UUCAAAAA	: .::::::::: ::::: ::	UUUUAAGUUCGUAGAAGUUCUU	6.5	17.5	2215
miR-9420	NVE6447	759	780	770	1	0	1	No	GGCCAGUAGGCUAGAUUUGUGU	::::: :::: :::::::.:	AGGGUCAGCCGA-CUAAACAUA	6	17.5	826
miR-9421	NVE16114	691	713	703	1	1	0	No	UGCAGUAAUGGACAGAUACGUCA	::: :::::: ::::::::. :	UCGUAAUUACC-GUCUAUGCGUU	7	18.5	1213
miR-9421	NVE20154	805	826	816	1	1	0	No	AGCAGAAAUGGAUGAUAUGCAA	:::: ::::: ::::.::::	UCGUAAUUACCGUCUAUGCGUU	7	17.5	1296
miR-9421	NVE23285	3791	3811	3801	1	1	0	No	AGUG-UAACGGAAGAUACGCAG	::.. ::: :: :::::::::.	UCGUAAUUACCGUCUAUGCGUU	5.5	17.5	8672
miR-9421	NVE24823	28091	28111	28101	1	0	1	No	GGUAGUGAUGGUAGAU-CGCAG	.:.: :.::::.:::: ::::.	UCGUAAUUACCGUCUAUGCGUU	6	17.5	34697
miR-9421	NVE26039	135	155	145	1	0	1	No	AGU-UUAGCGGCAGAUCCGCAA	::. :::. ::::::: :::::	UCGUAAUUACCGUCUAUGCGUU	5	18	1176
miR-9421	NVE5836	3007	3027	3017	1	0	1	No	AGC-UGGAUGGCGGAAACGCGA	::: : .:::::.:: ::::.:	UCGUAAUUACCGUCUAUGCGUU	6.5	17.5	4999
miR-9421	NVE9617	1172	1194	1184	1	0	1	No	AGUAUAGCAGGGCAGAAGCGCAA	::.:: . : :::::: .:::::	UCGUAAU-UACCGUCUAUGCGUU	7	17.5	2498
miR-9421star	NVE26211	551	573	563	1	1	0	No	AAUAACAUCUCUACUAUUGUAUG	::: : : :::::.::: ::::	UUAAAGCAUAGAUGGUAA-AUAC	7	17.5	1431
miR-9421star	NVE4323	199	219	209	1	1	0	No	AGUGUCGUUUCUAAC-UUUAUG	:.: :::: :::: : ::::::	UUAAAGCAUAGAUGGUAAAUAC	6.5	17.5	704
miR-9421star	NVE8513	127	149	139	1	0	1	No	ACUUAUCGCAUCUACCAAGUAUG	: :: ::: :::::::: ::::	UUAA-AGCAUAGAUGGUAAAUAC	7	18	1939
miR-9422star	NVE12937	1318	1339	1329	1	1	0	No	AUGGCGGAGGUUUGAGAACGUU	::.::::...:::: ::::.:	GACUGCCUUUGAACU-UUGCGA	7	17.5	1710
miR-9422star	NVE14805	645	666	656	1	1	0	No	CUGAUGGAAAACCUGAGACCCU	::::.:: :::: :::.:: ::	GACUGCC-UUUGAACUUUGCGA	6.5	18	2272
miR-9422star	NVE19383	2001	2022	2012	1	0	1	No	CUGUCGGCAAACUGGGGACGUU	::: ::: ::::: :..:::.:	GACUGCC-UUUGAACUUUGCGA	7	17.5	3994
miR-9422star	NVE23413	441	462	452	1	1	0	No	UUGAUGAGAAGCUUGCGACGCU	.:::.: :::.:::: .:::::	GACUGC-CUUUGAACUUUGCGA	6	18	3997
miR-9422star	NVE9053	342	363	353	1	0	1	No	CCGAUCAGGAACUUGAAGCGUU	: :: : :.::::::::.::.:	GACU-GCCUUUGAACUUUGCGA	5.5	17.5	2267
star	NVE12172	1493	1513	1503	1	1	0	No	GGGUGUUG-AACGGUUGCCACG	::.::.:: :::.:::.:: ::	CCUACGACGUUGUCAAUGGAGC	6	18	1645
star	NVE17217	763	785	775	1	0	1	No	GGAUGACUUUAACAAUGACCUCG	::::: :: .:::: : ::::::	CCUAC-GACGUUGUCAAUGGAGC	6.5	18.5	1220
star	NVE21580	1015	1036	1026	1	0	1	No	UUAUGCAGCAACAGUUGACUCG	:::: :::::::::. ::::	CCUACGACGUUGUCAAUGGAGC	6	17.5	9140
miR-9423	NVE13696	843	866	856	1	0	1	No	CAAAGGUUUUUCGAUAUGGACCAU	:: .:::.::: :::.:::::::	GUCAUCAAGAAG-UAUGCCUGGUA	6	19.5	2657
miR-9423	NVE23190	286	307	297	1	1	0	No	GAGGAAAUCUUCAUA-GGACUAU	:: : :::::::: ::::.::	GUCAUCAAGAAGUAUGCCUGGUA	7	17.5	1299
miR-9423	NVE8020	4098	4120	4110	1	1	0	No	CAGU-GUUCCUCAUGCGGACUGC	:::: :::: ::::.:::::..	GUCAUCAAGAAGUAUGCCUGGUA	6	18.5	5458
miR-2041bstar	NVE12821	382	404	394	1	1	0	No	ACGUUGUGGAAAAAUAACCCUU	:::::. .:::::::: ::::	UGCAAUCUCUUUUUAUGGGGAC	5	18	2903
miR-2041bstar	NVE14937	2540	2561	2551	1	1	0	No	GUGUCAAAUAAAAAUAUCCCUG	..:: : : :::::::.:::::	UGCAAUCUCUUUUUAUGGGGAC	5	17.5	2735
miR-2041bstar	NVE17014	1087	1107	1097	1	1	0	No	ACCUU-GAGAAAUAUAUACCUG	:: :: :::::: :::. ::::	UGCAAUCUCUUUUUAUGGGGAC	7	17.5	2977
miR-2041bstar	NVE17330	1561	1581	1571	1	0	1	No	AAAUUAGA-AAAAAUAUCCCCG	: ::::: :::::::.::: :	UGCAAUCUCUUUUUAUGGGGAC	6	17.5	2074
miR-2041bstar	NVE19027	813	835	825	1	1	0	No	ACGCUGGAGAAAAAUCCUCUUC	::: :.::::::::: :.:.:	UGCAAUCUCUUUUUAUGGGGAC	6.5	17.5	1881
miR-2041bstar	NVE24520	766	788	778	1	0	1	No	GCAUUGAACAAGAAUACACCCUG	.: ::. : ::.::::: :::::	UGCAAUCUCUUUUUAUG-GGGAC	7	17.5	1813
miR-9424a	NVE17758	2296	2317	2307	1	1	0	No	UCUGUCGCAGUGAGCC-AUUAUA	:::.: : .:::::: :.::::	UGACGGAGCUACUCGGUUGAUAU	7	17.5	2392
miR-9424a	NVE25903	1972	1993	1983	1	0	1	No	ACU-UUUAGGUGUGUCAACUAUG	::: ..: :.:: :.:::::::.	UGACGGAGCUACUCGGUUGAUAU	7	17.5	3449
miR-9426	NVE21620	514	535	525	1	1	0	No	CUUAUCAAGUCCUCAAAUUCAU	::: . :::.:::::::.:: :	GAAAGUUUCGGGAGUUUGAGAA	6.5	17.5	2634
miR-9426	NVE22161	347	369	359	1	0	1	No	UUUGCGAAGCCUUCAAACAUCAU	.:: :.:::::.:::::: :: :	GAAAGUUUCGGGAGUUUG-AGAA	7	18.5	1926
miR-9426	NVE5375	2909	2931	2921	1	0	1	No	GUAUCAAUAGUUCUUAAACUUUU	: :::: ::..::.:::::.::	GAAAGUU-UCGGGAGUUUGAGAA	7	18	2972
miR-9427	NVE10154	2506	2529	2519	1	1	0	No	UCUCAUCACUUUCAACUGGUUUCU	:: : ::: :.:: ::::::.:::	AGUGAAGUUAGAG-UGACCAGAGA	6.5	19	3237
miR-9427	NVE10727	2367	2390	2380	1	1	0	No	UUAUUUCAAAAUUACUGGUCUUA	:.:.::::: :.::::::::.	AGUGAAGUUAGAGUGACCAGAGA	7	18	2438
miR-9427	NVE25940	1052	1073	1063	1	1	0	No	CCACUCAGAUCU-ACUGGUCUCU	:::: .:::: ::::::::::	AGUGAAGUUAGAGUGACCAGAGA	5.5	18.5	2011
miR-9427	NVE8465	845	866	856	1	0	1	No	CCACUUCUA-CUCGUUUGUCUCU	:::::: : :::..: ::::::	AGUGAAGUUAGAGUGACCAGAGA	7	18	1590
miR-9428star	NVE1289	288	309	299	1	0	1	No	CAGAGCAUCUGGACUGUGUGUU	:::.::: ::::: .:.::::	AUCUUGUACACCUG-UAUACAA	6.5	17.5	2061
miR-9428star	NVE5892	340	361	351	1	1	0	No	CAGAAUUUGUGGAUACUGUGUU	::::. ::::::.: :.::::	AUCUUGUACACCUGU-AUACAA	6.5	17.5	575
miR-9428star	NVE6632	570	591	581	1	1	0	No	UAAGGCAUCUGGGAUAUAUGUU	:: ..::: : :::.:::::::	AUCUUGUACA-CCUGUAUACAA	6	17.5	1307
miR-9428star	NVE6962	375	396	386	1	1	0	No	GGGAAUAUGUGGAUGUGUAGUU	.:::.:::::::..:.: :::	AUCUUGUACACCUGUAUA-CAA	7	17.5	441
miR-9428star	NVE8283	652	671	661	1	0	1	No	AAGAACAUGUGGACA-CUGUU	:::::::::::::: ::::	AUCUUGUACACCUGUAUACAA	5	18	1214
miR-9424b	NVE15866	3724	3745	3735	1	0	1	No	UGAUCUUGAUAAGCCAACUUUA	:: .::.:::::.::: :::::	AC-GGAGCUAUUUGGUCGAAAU	5	18.5	4103
miR-9424b	NVE19054	204	225	215	1	1	0	No	UGCUGGUGAUAAAACAGCUUUA	:::. .:::::: ::::::::	ACGG-AGCUAUUUGGUCGAAAU	5	18	1072
miR-9424b	NVE24295	2683	2704	2694	1	0	1	No	UGUCUGCAAUAAAACAGCUUUA	::.:: : ::::: ::::::::	ACGGA-GCUAUUUGGUCGAAAU	4.5	18.5	3492
miR-9424b	NVE9234	2313	2334	2324	1	0	1	No	UGCUUGUGUAAACCAGGCUUUA	:::.: .::::::: ::::::	ACGGAGCUAUUUGGU-CGAAAU	5	18	5788
miR-9432	NVE10836	8094	8116	8106	1	0	1	No	AUUCCAAAUUUUUCGGUCACUUC	.:::::::..:::::: : :::	GGAGGUUUAGGAAGCCAAU-AAG	7	18.5	8591
miR-9434	NVE10395	1655	1677	1667	1	0	1	No	CAGAGGCU-GAAUUAUUGUCGGU	::::.::. ::::: .::::.:	GUCUUCGGUCUUAAGGACAGUCU	7	18	2726
miR-9434	NVE10620	363	384	374	1	0	1	No	CCGAAGUC-GAAUUCUUGGCAGA	: ::::.: ::::::.:: ::::	GUCUUCGGUCUUAAGGACAGUCU	5.5	19	949
miR-9434	NVE16795	611	632	622	1	0	1	No	CAUAAGCCUGGAUUCCU-CCAGA	:: ::::: :.:::::: ::::	GUCUUCGGUCUUAAGGACAGUCU	7	18.5	2049
miR-9434	NVE1793	783	805	795	1	1	0	No	CAGGGUCUAGCAUUUUUGUCAGA	:::.. :.:: :::..:::::::	GUCUUCGGUCUUAAGGACAGUCU	6.5	18.5	856
miR-9434	NVE19576	1115	1138	1128	1	1	0	No	AAGGUGUCAGCAAUUCCUCUCAGA	::. :.::: ::::::: :::::	GUCUUCGGUC-UUAAGGACAGUCU	6	19	1414
miR-9434	NVE21892	1244	1265	1255	1	0	1	No	UGGAA-UCAAACUUCUUGUCAGG	..::: .:: : :::.::::::.	GUCUUCGGUCUUAAGGACAGUCU	7	17.5	1678
miR-9435	NVE13575	833	855	845	1	0	1	No	CGGACCAGACCUACUUGACAAGG	:. :: ::: .::::::::::.	GUGUGAUCUAUGUGAACUGUUCU	7	17.5	1531
miR-9435	NVE14192	234	255	245	1	1	0	No	CAAAC-GGAUGGAUUUGACAAGG	:: :: .:::. :.::::::::.	GUGUGAUCUAUGUGAACUGUUCU	7	18	2310
miR-9435	NVE15828	2335	2357	2347	1	1	0	No	AACGCGAGAAAGACUUGACGAGG	::.: ::: : :::::::.::.	GUGUGAUCUAUGUGAACUGUUCU	7	17.5	3312
miR-9435	NVE21496	2548	2569	2559	1	1	0	No	UACCCUGGAUACG-UUGACAGGG	.:: ::.:::::. ::::::.:.	GUGUGAUCUAUGUGAACUGUUCU	6.5	18.5	3517
miR-9435	NVE25244	1773	1796	1786	1	1	0	No	CGGAACAGGUAACACUGGACAAGA	:. : ::.: ::::: :::::::	GUGUGAUCUA-UGUGAACUGUUCU	7	18	3864
miR-9435	NVE25337	858	879	869	1	0	1	No	UAUGCUGGAUACACUGGA-AAGA	.:..::.:::::::: :: ::::	GUGUGAUCUAUGUGAACUGUUCU	6	19	6128
miR-9435	NVE4256	376	397	387	1	0	1	No	CACGCUAGGUGU-UUUGACAGGA	:::.::::.:.. .::::::.::	GUGUGAUCUAUGUGAACUGUUCU	7	19	592
miR-9435	NVE7984	4041	4064	4054	1	0	1	No	CGUCAUUAGAUACGCUUGAGAAUA	:. ::.:::::::.::::: :: :	GU-GUGAUCUAUGUGAACUGUUCU	7	19.5	4367
miR-9435	NVE8557	203	224	214	1	1	0	No	UGUA-UGGAUGCAUUUGUCAAGA	...: :.:::.::.::: :::::	GUGUGAUCUAUGUGAACUGUUCU	7	18	1823
miR-9435	NVE9542	550	571	561	1	1	0	No	UGAAAUAGAGACACUUGA-GAGA	.. : :::: :::::::: .:::	GUGUGAUCUAUGUGAACUGUUCU	7	17.5	3659
miR-9435star	NVE6148	2253	2276	2266	1	1	0	No	GUACCAGCAGAGGUGUCUCUGGCA	:.::::: : ::::::::.:::	CGUGGUC-AGUGCACAGAGAUCGU	6.5	19	2438
miR-9436	NVE13473	1286	1305	1295	1	0	1	No	ACAUGCAAAUA-UUGUGUCCA	::::.::::.: :::.::: :	UGUAUGUUUGUAAACGCAGUU	6.5	17.5	1513
miR-9436	NVE19212	5752	5773	5763	1	0	1	No	AUAUUCAGAAUGAUUGCGUCAA	:.:: :: ::.. :::::::::	UGUAUGU-UUGUAAACGCAGUU	6.5	17.5	6637
miR-9436	NVE20205	1583	1602	1592	1	0	1	No	AGAUAUAAACAUUU-UGUUAA	: :::.:::::::: .::.::	UGUAUGUUUGUAAACGCAGUU	5.5	17.5	2407
miR-9436	NVE209	646	667	657	1	1	0	No	ACAUACAAGUGUUUGCAGUCUG	::::::::...::::: ::: .	UGUAUGUUUGUAAACG-CAGUU	7	18	1165
miR-9436	NVE8244	269	290	280	1	1	0	No	GCAUGAGAACAUUCUGCGUCAA	.:::. .:::::: ::::::::	UGUAUGUUUGUAA-ACGCAGUU	4.5	18.5	920
miR-9436star	NVE14006	1906	1930	1920	1	0	1	No	CAAACAUGUUUUGGAUGUAUGGCAA	:::::::: ::::.:::: :.:: :	GUUUGUAC-AAACUUACAAAUCGGU	7	21	2115
miR-9436star	NVE16152	7713	7737	7727	1	0	1	No	CAAACAAGUUUGCAUGUCUAGUCU	:::::: ::::: :::: :::.:	GUUUGUACAAACUUACAAAUCGGU	7	19.5	8119
miR-9436star	NVE7518	410	432	422	1	1	0	No	CAAG-GUUUUGGAGUGUUUGGCCA	:::. .: :: ::.:::::.::::	GUUUGUACAAACUUACAAAUCGGU	6	19	2710
miR-9437	NVE14234	1376	1398	1388	1	0	1	No	UGACUUUUUUAGAUUCUCGUUUA	.::. : :.::::::::::: :	CUUGGCAUAGUCUAAGAGCAAUU	6.5	17.5	1898
miR-9438	NVE21111	824	844	834	1	1	0	No	AGAC-AGACACUUGUGCUGUAU	:. : ::::::::::: ::::	UUAGCUCUGUGAACACAUCAUA	6.5	17.5	2396
miR-9438	NVE3792	1524	1546	1536	1	1	0	No	AAUCUAGAAGAAUUGUGUAGAAU	:::: :: : : :::::::: ::	UUAGCUC-UGUGAACACAUCAUA	7	18	2281
miR-9444	NVE101	1756	1778	1768	1	0	1	No	AGACGGGUUGGCUGCUGUUCGAA	::: :::::::: : :::::: :	UCU-CCCAACCGCCAACAAGCAU	7	19	3187
miR-9444	NVE18310	2371	2391	2381	1	1	0	No	AGAGGCUUGCCUGUUGUU-GUA	::::: ::: : :::::: :::	UCUCCCAACCGCCAACAAGCAU	7	18	3132
miR-9444	NVE9330	716	738	728	1	1	0	No	GGAGGGGAUGGAUGUUGUUCGUA	.:: ::: ::: ::::::::::	UCU-CCCAACCGCCAACAAGCAU	6.5	18.5	1418
miR-9446	NVE11677	1328	1349	1339	1	1	0	No	AUAAGACGACAUACAGUAAAAA	:.: ::::::::: :: :::::	UGUACUGCUGUAU-UCUUUUUU	5.5	18.5	1517
miR-9446	NVE14220	3136	3157	3147	1	1	0	No	GCAUCACCGACAUGAGGAAGAA	.::: : ::::::.::.::.::	UGUACU-GCUGUAUUCUUUUUU	5.5	18	4182
miR-9446	NVE16071	1237	1258	1248	1	1	0	No	AGAUGACGACAUGAAGCAAAAG	: :::::::::: ::: ::::.	UGUACUGCUGUA-UUCUUUUUU	5.5	18.5	8004
miR-9446	NVE19001	682	701	691	1	0	1	No	AUAUGAC-ACAUAAGAAACCA	:.::::: :::::::::: :	UGUACUGCUGUAUUCUUUUUU	5.5	17.5	3160
miR-9446	NVE19551	101	122	112	1	1	0	No	ACAUGUCUGCAUCAAGGAAAGA	::::: : .::: :::.:::.:	UGUACUGCUGUA-UUCUUUUUU	6.5	17.5	886
miR-9446	NVE20479	52	72	62	1	0	1	No	ACAUGGCGACACAAGAUAACA	:::::.::::: :::: :: :	UGUACUGCUGUAUUCUUUUUU	6.5	17.5	566
miR-9446	NVE21038	1178	1199	1189	1	1	0	No	AUAUGAAGAUAGUCAGAAAAAG	:.:::: ::.: : :::::::.	UGUACUGCUGU-AUUCUUUUUU	7	17.5	1317
miR-9446	NVE2175	419	440	430	1	0	1	No	AAAUGACCAAGAUAAGAAAAAA	: :::: : : :::::::::::	UGUACU-GCUGUAUUCUUUUUU	5	18	562
miR-9446	NVE22986	3652	3674	3664	1	1	0	No	ACGAAGACGACAUAAGAAGAAC	:: : :::::::::::::.::	UG-UACUGCUGUAUUCUUUUUU	4	18.5	3985
miR-9446	NVE2476	1214	1235	1225	1	1	0	No	UCACGACUAUCAUAGGAAAAAA	:: ::: : ::::.:::::::	UGUACUGCU-GUAUUCUUUUUU	6	17.5	1791
miR-9446	NVE2795	2726	2747	2737	1	1	0	No	ACUAGUCGACAUGAAGAAGAAA	:: : :::::: :::::.:::	UGUACUGCUGUA-UUCUUUUUU	6	17.5	3869
miR-9446	NVE6003	19	39	29	1	0	1	No	ACAGGACGGUAUACGAGAAAA	::: ::::..::: ::.::::	UGUACUGCUGUAUUCUUUUUU	6	17.5	494
miR-9446	NVE7914	2319	2339	2329	1	0	1	No	ACAUAACGACAUAACAAAAUA	:::: ::::::::: :::: :	UGUACUGCUGUAUUCUUUUUU	5	18	3190
miR-9446	NVE9125	1270	1291	1281	1	1	0	No	GUAUGACGACAGAAAGAUAAAA	..::::::::: :::: ::::	UGUACUGCUGU-AUUCUUUUUU	7	18	2121
miR-9447	NVE11862	336	357	347	1	0	1	No	GUAGAAGCAAGAAGGUGGAUUG	:.::: :::::::::.::.:	CGUCUGACUUCUUCCACUUAGC	5.5	17.5	6937
miR-9447	NVE12867	1075	1098	1088	1	0	1	No	GUAGCGAUGGAGGAGGUGAAUUU	:.:: . ::.::.::::::::.	CGUC-UGACUUCUUCCACUUAGC	6.5	17.5	2322
miR-9447	NVE1396	231	252	242	1	1	0	No	UUGGACUGAAGAAGGUGAAGAG	..:::::::::::::::: :	CGUCUGACUUCUUCCACUUAGC	6	18	829
miR-9447	NVE18540	3825	3849	3839	1	0	1	No	GCAGGGCGACAGAAGGUGAAUAA	::::. :: :::::::::::	CGUCUGACU-UCUUCCACUUAGC	6.5	17.5	4186
miR-9447	NVE22591	29813	29835	29825	1	0	1	No	GCAAACUGAAGCAGGCGGAUCA	::: ::::::: ::: :.:::	CGUCUGACUUCUUCCACUUAGC	7	17.5	30142
miR-9447	NVE22995	2236	2257	2247	1	1	0	No	GCUUAUUGAAGAA-GUGAAUCA	:: :.::::::: :::::::	CGUCUGACUUCUUCCACUUAGC	5.5	17.5	3235
miR-9447	NVE23973	932	952	942	1	1	0	No	GCGGA-UGAAGAAGGUGGAAAG	::.:: :::::::::::.: :	CGUCUGACUUCUUCCACUUAGC	6.5	18	2613
miR-9447	NVE24658	771	794	784	1	1	0	No	AUGGACUGGAAGAAGGAGGAUCC	..:::: :::::::: :.:::	CGUCUGA-CUUCUUCCACUUAGC	7	17.5	1459
miR-9447	NVE26007	2887	2909	2899	1	0	1	No	GCAGACUGAAGGAGGUUACUCA	:::::::::::.:::: : ::	CGUCUGACUUCUUCCACUUAGC	6	18.5	13775
miR-9447	NVE2638	995	1015	1005	1	0	1	No	GCGGAC-GAAGAAGAUGAAAUG	::.::: ::::::: :::: .:	CGUCUGACUUCUUCCACUUAGC	6.5	18	1517
miR-9447	NVE5658	1638	1659	1649	1	1	0	No	CCAGGCUGAGGAAGGAGACUCG	:::.::::.::::: :: :::	CGUCUGACUUCUUCCACUUAGC	6.5	18	2626
miR-9447	NVE7403	1372	1393	1383	1	1	0	No	GCAGACUCAAGAGUGUGAAUCG	::::::: ::::. ::::::::	CGUCUGACUUCUUCCACUUAGC	4	19.5	1463
miR-9449	NVE2359	282	304	294	1	0	1	No	ACGGUGAGUGUUUUGGGAGAUU	:::.:::.::::: .::::::	UGCUACUUACAAAUUCCUCUAU	5	18.5	445
miR-9449	NVE693	1026	1048	1038	1	1	0	No	AUGAUGACUUUGUUACGGAGAUA	:.::::: : : ::: :::::::	UGCUACUUACA-AAUUCCUCUAU	6.5	18.5	2713
miR-9449	NVE7775	1162	1182	1172	1	0	1	No	GCGAUGGAUG-UCGAGGAGAUG	.:::::.::: : .:::::::.	UGCUACUUACAAAUUCCUCUAU	6.5	18	2403
miR-9450	NVE20904	1121	1143	1133	1	1	0	No	CUUACGGAUUUCUUAGGAAUCA	:..:: ::::::: :.:::::	GGGUGACUAAAGAUUUCUUAGA	6	17.5	4169
miR-9451	NVE18689	1032	1053	1043	1	1	0	No	UUCUUGUCUCUUUGAGGUUUGU	:::.:::: ::::::..:.::	AAGGACAGUUAAACUCUGAGCA	6.5	18	1965
miR-9452	NVE13463	1600	1621	1611	1	1	0	No	UGUUUUGUAGGCUU-AUUUAGCA	: : :::.:..::: ::.:::::	AAACAACGUUUGAAGUAGAUCGU	7	18	1937
miR-9452	NVE17858	610	633	623	1	0	1	No	UUAGUCGCAACCUUCAUUUGGCU	:: :: :::: ::::::.:.::	AAACAACGUUUGAAGUAGAUCGU	7	18	1199
miR-9452	NVE21550	1045	1067	1057	1	1	0	No	UUCAUUUCUAACUUCUUCUAGCA	:: :: : :::::: :::::::	AAACAACGUUUGAAGUAGAUCGU	6	18	1459
miR-9452	NVE22429	2431	2452	2442	1	1	0	No	CUUGUUACAAAUUUCGUC-GGCA	::::: ::::.:::.:: .:::	AAACAACGUUUGAAGUAGAUCGU	7	18.5	4334
miR-9454	NVE17440	312	332	322	1	1	0	No	CCUUCGAAACUGU-ACUUGGUA	:::. .:::: :: ::.:::::	GGAGUUUUUGUCACUGGACCAU	7	17.5	767
miR-9454	NVE456	5919	5942	5932	1	0	1	No	GCUCAAAAUCAGUGACAUUGGUU	::::::: ::::::: .::::	GGAGUUUUUGUCACUG-GACCAU	6	18.5	6434
miR-9454	NVE6525	8503	8525	8515	1	1	0	No	CAUCGAGAACAGUGACCUACGUG	: ::.:.::::::::::: ::.	GGAGUUUUUGUCACUGGA-CCAU	6.5	18.5	11586
miR-9457	NVE11598	1224	1247	1237	1	0	1	No	AAUACCAUUCUUAGAACUGUGUC	: .:: ::::::::: :::::	UCGUGAAAAGAAUCUU-ACACAU	6.5	17.5	2972
miR-9457	NVE12729	655	677	667	1	1	0	No	AGGACCUACCUUGGAGAUGUGUA	:: :: : :::.:: :::::::	UCGUGAAAAGAAUCU-UACACAU	7	17.5	1378
miR-9457	NVE22824	2400	2422	2412	1	0	1	No	AGCAUUGUUCUUUAUGAUGUGUA	::::.: ::: ::: .:::::::	UCGUGAAAAG-AAUCUUACACAU	6.5	19	4180
miR-9457	NVE8105	414	437	427	1	1	0	No	AGUGGUGUUUCUAAGAGUGUGUC	::.. : ::::: :::.:::::	UCGUGA-AAAGAAUCUUACACAU	7	17.5	5678
miR-9458	NVE25986	227	248	238	1	1	0	No	GCCGCUGCUUCUUUGCUCGCGU	:: :: : :::::::::::::	GGGAGAGGUAGAAACGAGCGCA	4	18	776
miR-9458	NVE6076	1258	1279	1269	1	1	0	No	UCCUCACCAUCUUUGCUUGAUU	.:::: :::::::::::.: :	GGGAGAGGUAGAAACGAGCGCA	6.5	18	1829
miR-9458	NVE6946	151	171	161	1	1	0	No	UGCUCUCUAUUUUU-CUCUCGU	. :::::.::.::: ::: :::	GGGAGAGGUAGAAACGAGCGCA	7	17.5	1752
miR-9458	NVE711	725	745	735	1	1	0	No	CCUUCUCCGUUUCUGCU-GUGU	::.:::::.:.: :::: :.::	GGGAGAGGUAGAAACGAGCGCA	7	18	8297
miR-9459	NVE309	1246	1267	1257	1	0	1	No	AUCCUUUGUUCUUUGAGGGCUU	:::::::: :: ::::: :::	UAGGAAACCAGCAACUCAGGAA	7	18	2453
miR-9460	NVE19991	3613	3632	3622	1	0	1	No	UUAAUCACGACAAGCGCGUG	:.::::::::: :.:::::.	AGUUAGUGCUGGUUGCGCAU	4	17.5	4251
miR-9461	NVE19921	1792	1815	1805	1	1	0	No	UGAUUUGUCUCACUGUCAUUUUC	:: ::: : .:::::::::..:	ACCAAA-ACGGUGACAGUAGGAC	6.5	17.5	1989
miR-9461	NVE3714	382	404	394	1	0	1	No	UGUUGUUGUUGUUGGUCAUCCUG	:: : :::....: :::::::::	ACCAAAACGGUGA-CAGUAGGAC	7	18	2309
miR-9463	NVE16345	696	716	706	1	1	0	No	AGUUGUA-UUAUGCGAUUUAGU	:..:::: :: :: ::::.:::	UUGACAUCAAGACUCUAAGUCA	7	17.5	813
miR-9463	NVE5159	914	934	924	1	0	1	No	AAAUGUAGUUUU-AGUUUCGGU	:: :::::::.: :: :::.::	UUGACAUCAAGACUCUAAGUCA	7	18	1326
miR-9464	NVE18455	681	703	693	1	1	0	No	ACUGUUUGACGAAAUC-UCUCAGA	: .::: ::::::: :::::::	CAAAGAACAGCUUUAGAAGAGUCU	6.5	18.5	1538
miR-9465	NVE13062	2507	2527	2517	1	1	0	No	CUCUCAAAGU-CUUUCAUUUAA	:::::::: : ::..:::..::	GAGAGUUUAAGGAGGGUAGGUU	7	18	2660
miR-9465	NVE18312	8107	8128	8118	1	1	0	No	CCCUCGAGUACCUUGCAUCCAA	: :::.:.: :::. :::::::	GAGAGUUUAAGGAGGGUAGGUU	7	17.5	10369
miR-9465	NVE22371	2719	2741	2731	1	0	1	No	CUCUCGGCCAUCCUUCCCUCCAA	:::::.. ::::.:: :::::	GAGAGUU-UAAGGAGGGUAGGUU	7	17.5	2817
miR-9465	NVE23270	80	100	90	1	0	1	No	CUUUUAAAAUCCU-UAAUCCAA	::.:.::: :::: . ::::::	GAGAGUUUAAGGAGGGUAGGUU	7	17.5	465
miR-9465	NVE9231	3176	3196	3186	1	0	1	No	CUC-CAGACUUCUCUCGUCCAG	::: ::.: :.:::.:.::::.	GAGAGUUUAAGGAGGGUAGGUU	6	17.5	4122
miR-9466	NVE14462	1167	1189	1179	1	1	0	No	AAAGUGUGUCACGUGACCAACUG	: : :.. ::::::.::: ::::	UCUGAUG-AGUGCAUUGGCUGAC	7	17.5	2011
miR-9466	NVE24059	4621	4641	4631	1	0	1	No	AAAUCACUCACG-AACCGGUUG	: :. ::::::: :::::..::	UCUGAUGAGUGCAUUGGCUGAC	6.5	17.5	4920
miR-9466	NVE3177	1034	1054	1044	1	1	0	No	AAAUUACUUACCUAA-UGACUG	: :.::::.:: ::: .:::::	UCUGAUGAGUGCAUUGGCUGAC	7	17.5	3766
miR-9466	NVE4941	304	325	315	1	1	0	No	AGAAUGGUCACGUGAUCGUCUG	::: :. ::::::.:.:: :::	UCUGAUGAGUGCAUUGGCUGAC	6.5	17.5	1108
miR-9466	NVE9617	2185	2205	2195	1	1	0	No	AGAUUG-UUACGUAAUCGACCG	:::.:. :.::::::.:::: :	UCUGAUGAGUGCAUUGGCUGAC	5.5	18	2498
miR-9467	NVE1565	778	799	789	1	1	0	No	CAAAAGGGCAGUG-GAGAAAAUG	: ::::: ::: .::::::::	GAGGUCCCGCCACAUUCUUUUAC	7	17.5	1536
miR-9467	NVE16560	196	218	208	1	0	1	No	CUGCAGGGAGGUGAAGGGAGAUG	:: ::::: :::: :.:.:.:::	GAGGUCCCGCCACAUUCUUUUAC	7	18.5	1781
miR-9468	NVE12065	961	982	972	1	1	0	No	CCUUUUCAAUCAAUGUAC-UUUC	:::.. : :.:::::::: .:::	GGAGGUGCUGGUUACAUGUGAAG	6.5	18	1122
miR-9468	NVE16406	1082	1103	1093	1	0	1	No	UCGUUAC-AUUAAUGUACAUUUU	.: ..:: :..::::::::.::.	GGAGGUGCUGGUUACAUGUGAAG	6.5	17.5	1518
miR-9468	NVE21535	1010	1032	1022	1	1	0	No	CGUCUACUGCCAAUGUGCGCUAC	: ::.:: .:::::::.:.:: :	GGAGGUGCUGGUUACAUGUGAAG	7	18	1301
miR-9468	NVE23867	554	575	565	1	1	0	No	CUUCUAGUAAC-AUGUACACUUC	:.::.: : : :::::::::::	GGAGGUGCUGGUUACAUGUGAAG	6	18	998
miR-9468	NVE24098	97	122	112	1	0	1	No	UCUCACGUGACCAAUGUACGCUGG	.::: :..:::::::::::.::	GGAG-GUGCUGGUUACAUGUGAAG	6.5	19	914
miR-9422	NVE1388	1265	1285	1275	1	0	1	No	UUGGCUCUUCUCUC-UCUGUCG	:..:: ::::: :: ::::::.	AGUCGCGAAGAUAGAAGACAGU	6.5	17.5	1339
miR-9422	NVE4646	713	735	725	1	0	1	No	UCAGCUGUUCUGUCCAUCUGUCA	::::: ::::.: : :::::::	AGUCGCGAAGAUA-GAAGACAGU	7	18.5	1679
miR-2022	NVE12341	129	152	142	1	1	0	No	GUUAGACAAAAGCAGCUUGCAAU	:. ::::::::::.:: ::::	CGCCCUGUUUUCGUUGAUCGUUU	6.5	18	1714
miR-2022	NVE12356	7453	7476	7466	1	1	0	No	ACGGCAACGUAAGCAACUAGCCAA	::: ::. ::::::::::: ::	CGCC-CUGUUUUCGUUGAUCGUUU	6.5	18.5	8967
miR-2022	NVE17575	979	1001	991	1	0	1	No	GUGGGGCACGAGCAAUCGGCAAG	:.:::.:: .:::::. .::::.	CGCCCUGUUUUCGUUGAUCGUUU	7	18	1717
miR-2022	NVE23413	1393	1416	1406	1	1	0	No	GCAGGUCAAAGAGCAACAAGUAGA	:: :: :::: :::::: ::.:.:	CGCCCUGUUU-UCGUUGAUCGUUU	7	19	3997
miR-2022	NVE3472	20724	20746	20736	1	1	0	No	GACAGGCAGAAGCAACUAGAGAA	: :.::.:::::::::: .::	CGCCCUGUUUUCGUUGAUCGUUU	7	17.5	35619
miR-2022	NVE3660	85	107	97	1	1	0	No	GACGAAGAAGAGCAACUAGGAAA	: : : ::.::::::::: :::	CGCCCUGUUUUCGUUGAUCGUUU	6.5	17.5	1289
miR-2022	NVE4746	143	164	154	1	1	0	No	GAUGGAU-AAAGCAAUUAGAAAG	: :::. :::::::.::: ::.	CGCCCUGUUUUCGUUGAUCGUUU	7	17.5	8530
miR-2022	NVE8087	2216	2238	2228	1	0	1	No	GCGGCAAAAGAGUUACUAGUAAG	:::: : ::.::. :::::.::.	CGCCCUGUUUUCGUUGAUCGUUU	7	18	2808
miR-2023	NVE12253	1137	1158	1148	1	0	1	No	CGUUUCCACCUUGUACUUAUUU	: .: ::: ::::::::: :::	GGGAUGGU-GAACAUGAAGAAA	5.5	17.5	1691
miR-2023	NVE13550	1193	1212	1202	1	1	0	No	CCUUA-CACUUGUACUUUAUU	::.:: :::::::::::. ::	GGGAUGGUGAACAUGAAGAAA	4.5	18	1548
miR-2023	NVE18535	271	291	281	1	1	0	No	CCUUAUC-CUUGUGCUUCUUG	::.::.: :::::.::::::	GGGAUGGUGAACAUGAAGAAA	4	17.5	1195
miR-2024a	NVE11132	256	278	268	1	0	1	No	UUUUGGUAUCGGUGCUGUGUAC	:. ...:::::::.:::::::	AGUGUUAUAGCCAUGACACAUU	5	17.5	1005
miR-2024a	NVE11135	520	542	532	1	1	0	No	UAAAAAUAUCGGUGCUGUCUAC	: : :::::::::.:::: ::	AGUGUUAUAGCCAUGACACAUU	6	17.5	3326
miR-2024a	NVE11137	616	638	628	1	1	0	No	UUAUGGUAUCGGUGCUGUGUAC	:.:...:::::::.:::::::	AGUGUUAUAGCCAUGACACAUU	4	18.5	2531
miR-2024a	NVE15135	145	167	157	1	0	1	No	UCACCAUCUCGGUAUUUUUGUAA	:::: :: :::::: .: :::::	AGUGUUAUAGCCAU-GACACAUU	7	18.5	4436
miR-2024a	NVE5522	914	934	924	1	0	1	No	UCACAAUAUCGAUACUG-AUGA	::::::::::: ::::: :.:	AGUGUUAUAGCCAUGACACAUU	7	18.5	2031
miR-2024e	NVE10088	197	217	207	1	0	1	No	UCAGAAUAUUGG-AGUCUGCAA	:::::::::::: :.: :::::	AGUCUUAUAACCAUUACACGUU	5	19.5	3704
miR-2024e	NVE12513	864	886	876	1	0	1	No	CCAGGGUAUGGGUAAUGUGCAC	:::..::: :::::::::::	AGUCUUAUAACCAUUACACGUU	5	18	3433
miR-2024e	NVE12992	48773	48793	48783	1	1	0	No	UCAGGAUAUUGGU-ACGUACAA	::::.:::::::: : :: :::	AGUCUUAUAACCAUUACACGUU	6.5	18.5	62478
miR-2024e	NVE13062	2598	2620	2610	1	1	0	No	ACAGAAUGUUGUUAAUGAUGUAA	::::::.::: ::::: ::.::	AGUCUUAUAACCAUUAC-ACGUU	6.5	19	2660
miR-2024e	NVE22550	2422	2442	2432	1	1	0	No	UCAG-AUACUGGUGAUCAGCAA	:::: ::: ::::.:: ::::	AGUCUUAUAACCAUUACACGUU	7	17.5	2485
miR-2024e	NVE23869	1160	1180	1170	1	0	1	No	UGAGGGUAUUGGU-AUGUUCAA	: ::..::::::: :::: :::	AGUCUUAUAACCAUUACACGUU	6	18	3542
miR-2024estar	NVE19425	2173	2194	2184	1	1	0	No	UUUUGCCUGGCGUUAAUAUGUU	:::::::..:::..::::. .:	AAAACGGGUCGCGGUUAUGAGA	7	18	2465
miR-2024g	NVE14676	82	104	94	1	0	1	No	UAACAACAUCGGUAUUGUGUUC	: :::: :::::::.::::::	AGUGUUAUAGCCAUGACACAAU	4	18.5	1053
miR-2024g	NVE16264	1102	1124	1114	1	0	1	No	UAACAAUAUAGGUGCUGUGUUC	: ::::::: :::.:::::::	AGUGUUAUAGCCAUGACACAAU	5	18.5	1865
miR-2024g	NVE16270	2802	2824	2814	1	1	0	No	UUCCAACAUCGGUGCUGUGUUC	:. ::: ::::::.:::::::	AGUGUUAUAGCCAUGACACAAU	4.5	18	4783
miR-2024g	NVE20647	169	191	181	1	0	1	No	CCGCCAUGUUUUGUACUGUGUUA	:.: ::. :. :::::::::::	AGUGUUAU-AGCCAUGACACAAU	7	17.5	1651
miR-2024g	NVE5581	1026	1048	1038	1	1	0	No	UAACAAUAUCGGUGCUGUGUUC	: :::::::::::.:::::::	AGUGUUAUAGCCAUGACACAAU	3	19.5	4309
miR-2024g	NVE7114	1415	1435	1425	1	0	1	No	UCAUAAUCUU-GUACUCUGUUA	:::.::: :. ::::: :::::	AGUGUUAUAGCCAUGACACAAU	6.5	18	1834
miR-2025	NVE11265	2429	2449	2439	1	0	1	No	ACAACUU-GGAGAGCUAAAAAA	::::::: : : :::::::::	UGUUGAAGGCGCCCGAUUUUUU	6	18	2492
miR-2025	NVE24914	420	440	430	1	0	1	No	AUAA-UUCUGCGGACGAAGAAA	:.:: :::.:::: : ::.:::	UGUUGAAGGCGCCCGAUUUUUU	7	17.5	1785
miR-2026	NVE12675	1233	1253	1243	1	1	0	No	UCCAUAAGGACACAUUUGGAA	::::: :: : :::::::.::	AGGUAGUCAUCUGUAAACUUU	6	17.5	1730
miR-2026	NVE1562	1149	1170	1160	1	0	1	No	UUUAUGCAGUAGACAAUUGCAA	:..:: ::::::::: ::: ::	AGGUA-GUCAUCUGUAAACUUU	6	18	1637
miR-2026	NVE3256	1036	1057	1047	1	1	0	No	UCAGUCAGUAGUGCAUAUGAAA	:: .::::::: .::: :::::	AGGUAGUCAUC-UGUAAACUUU	6.5	18	1450
miR-2026	NVE7232	1260	1281	1271	1	0	1	No	GCUGUCAAUAGAACAUUUGAAA	:..::: ::: ::::::::::	AGGUAGUCAUC-UGUAAACUUU	5	18	2692
miR-2030	NVE17215	631	652	642	1	1	0	No	GUUUCCUUGUAAUGAUAUGUUA	.:.: :::..:::: ::::.::	UAGA-GAAUGUUACAAUACGAU	6.5	17.5	754
miR-2030	NVE18914	2571	2590	2580	1	0	1	No	AUCUCUUGGAA-GUUGUGCUG	:::::::. :: :::.::::.	UAGAGAAUGUUACAAUACGAU	6	17.5	3169
miR-2030	NVE227	1077	1098	1088	1	0	1	No	AUCUCUUGGAAUCUUAUGCCUA	:::::::. ::: ::::: :::	UAGAGAAUGUUACAAUAC-GAU	5.5	18.5	1497
miR-2030	NVE23214	835	855	845	1	0	1	No	AUCUCUGACAAUGCUUUGCUA	:::::: :::::: : :::::	UAGAGAAUGUUACAAUACGAU	5	18	1501
miR-2030	NVE9237	3602	3623	3613	1	0	1	No	AUUUUUUCACACUGUUAUGUUG	::.:.:: ::: :::::::.:.	UAGAGAA-UGUUACAAUACGAU	5.5	18	4031
miR-2030	NVE9248	770	789	779	1	1	0	No	UUUUCUUACAAUGUU-UGCUG	:.:::::::::::: ::::.	UAGAGAAUGUUACAAUACGAU	4	18	1283
miR-2030	NVE9889	3883	3904	3894	1	1	0	No	GUCGAUGACAAUGUUGAUGCUA	.:: : :::::::: ::::::	UAGAGAAUGUUACAA-UACGAU	5.5	17.5	4253
miR-2031star	NVE11346	4847	4869	4859	1	1	0	No	GUGAGGCAUCUGUAUUUAUUGUA	.:. :::: :: ::::::: :::	UAUGCCGU-GAGAUAAAUACCAU	7	18	8386
miR-2031star	NVE12929	843	864	854	1	1	0	No	AUAUGGGACUUUAUCUAUGCUA	:::.:: :::.::: :::: ::	UAUGCCGUGAGAUAAAUACCAU	6.5	18	1281
miR-2031star	NVE25592	638	658	648	1	0	1	No	AUAAUGAACUCU-UUUAUGGUA	::: : ::::: :::::::::	UAUGCCGUGAGAUAAAUACCAU	5	18	1430
miR-2036	NVE16927	535	556	546	1	1	0	No	UAAGG-GAGAGUCGUGAGAUAUG	:: :. :::::::::. .::::.	AUGCUACUCUCAGCAUGUUAUAU	7	18	798
miR-2036	NVE7195	1418	1439	1429	1	1	0	No	UCUGCUAACAGUCGU-CAAUAUA	: .: : : :::::: :::::::	AUGCUACUCUCAGCAUGUUAUAU	6.5	17.5	3535
miR-2037	NVE11351	1062	1083	1073	1	1	0	No	GCGCUAAAGGUCAUCAAUCGUA	.:: ::::.::: .:::::..:	UGCCAUUUUCAGAGGUUAGUGU	7	17.5	2510
miR-2037	NVE13015	4165	4186	4176	1	1	0	No	AAGG-AAAAGUCUCAAAUCGCC	: :: ::::::::: ::::.:	UGCCAUUUUCAGAGGUUAGUGU	6	17.5	12621
miR-2037	NVE13977	734	755	745	1	1	0	No	GAGGCAAGAAUCUCCAAUCACA	. :: ::.: ::::::::::::	UGCCAUUUUCAGAGGUUAGUGU	5	18	3293
miR-2037	NVE22603	1166	1187	1177	1	1	0	No	AUGAUAAAAGUCUUCAAUCAAA	:.: :::::::::.:::::: :	UGCCAUUUUCAGAGGUUAGUGU	4.5	19	2486
miR-2037	NVE3080	378	398	388	1	1	0	No	ACGGAAAAUGUUUAC-AUCACA	:::: ::: ::.: : ::::::	UGCCAUUUUCAGAGGUUAGUGU	7	17.5	1221
miR-2038	NVE14591	1898	1919	1909	1	0	1	No	UGAUAAUGGUGAUAUUGAUGGU	: :: :::::::.:::.: :::	AGUAGUACCACUGUAAUU-CCA	6	18	2522
miR-2038	NVE23812	2299	2319	2309	1	0	1	No	CUAUUGUGGUGACAUUAUGGU	.::..::::::::::: :::	AGUAGUACCACUGUAAUUCCA	4.5	17.5	3040
miR-2042	NVE10036	1380	1402	1392	1	0	1	No	UUGGUCCAAAGGAUGAUGUAUAA	:.:: : ::::::::: :::::	CAUCACG-UUCCUACUAAAUAUU	5.5	18.5	1659
miR-2042	NVE15998	79	102	92	1	0	1	No	ACAGUGCAGGGGAUGAUUUGUGC	:::::: .:::::::::.:.	CAUCACGU-UCCUACUAAAUAUU	6.5	17.5	963
miR-2042	NVE17325	544	566	556	1	1	0	No	GAGCUGCAAAGGAUGAUUGAUGA	: . ::: :::::::::: ::.:	CAUCACG-UUCCUACUAAAUAUU	6.5	18	1515
miR-2042	NVE21285	184	205	195	1	1	0	No	GAAGUGCAAGGAUGAUCUAGGG	: :::::::::::::: :: ..	CAUCACGUUCCUACUAAAUAUU	6.5	18	1584
miR-2042	NVE22300	599	622	612	1	0	1	No	AUAGUGUACUGGAUGAAUUAUAC	:::::.: :::::: :::::	CAUCACGU-UCCUACUAAAUAUU	6.5	17.5	1136
miR-2042	NVE4864	322	342	332	1	0	1	No	UUGCUGCAAGGAU-AUUUCUAA	:. ::::::::: :::: :::	CAUCACGUUCCUACUAAAUAUU	6.5	17.5	703
miR-2042	NVE5466	227	248	238	1	0	1	No	GAAGUUUAAGAAUGAUUUAAAA	: ::: .::: :::::::: ::	CAUCACGUUCCUACUAAAUAUU	6.5	17.5	6148
miR-2043astar	NVE17757	2183	2204	2194	1	0	1	No	GAUAAUGCUGUCUAUUGA-AGUA	::::::.:.:::: :::: :::	HNAUUAUGGCAGAAAACUCCCAU	7	19	3107
miR-2043astar	NVE191	1058	1081	1071	1	0	1	No	GUUAGAUCUGUCAUUUUGAUGGUA	::::. :.::: :::::: ::::	HNAUUAUGGCAG-AAAACUCCCAU	7	19	1437
miR-2043astar	NVE2118	847	869	859	1	1	0	No	UAAGACACCAUCUUUUGGGUGUG	:: .: ::: :::::::.: ::.	HNAUUAUGGCAGAAAACUCCCAU	7	17.5	1265
miR-2043astar	NVE22450	1193	1215	1205	1	0	1	No	UAUUAUAAGCUUUGUUGAGGGUA	::: ::: :.: :::::::::	HNAUUAUGGCAGAAAACUCCCAU	7	17.5	1393
miR-2043astar	NVE23611	3063	3086	3076	1	1	0	No	UGUACAUGCUGUCUUUUGAUGGAG	:::: ::.:.::::::::: :: .	HNAU-UAUGGCAGAAAACUCCCAU	6.5	19.5	3993
miR-2043astar	NVE24117	805	827	817	1	0	1	No	UGACAGACCAUCGUUUGAGGGUG	:: : ::: :: :::::::::.	HNAUUAUGGCAGAAAACUCCCAU	6.5	17.5	1169
miR-2043astar	NVE3678	1840	1861	1851	1	0	1	No	CCAAUUAUU-UCUUUUGAGGGGG	:: : ::.. ::::::::::: .	HNAUUAUGGCAGAAAACUCCCAU	6.5	17.5	2198
miR-2043astar	NVE3959	115	137	127	1	1	0	No	CCUAAAGUUGUCUUUUUAGCGUA	::::: ...::::::: :: :::	HNAUUAUGGCAGAAAACUCCCAU	6.5	18.5	2578
miR-2043astar	NVE8122	1187	1209	1199	1	0	1	No	AAAAAAAUAAACUUUUGAGGGUA	:: :: :. ::::::::::::	HNAUUAUGGCAGAAAACUCCCAU	6.5	17.5	1770
miR-2045star	NVE16751	842	863	853	1	0	1	No	UAACAGAGAUUAUAUUAUAAUG	:: ::::::::: ::::. ::.	AUGGUCUCUAAU-UAAUGGUAU	6.5	18	1138
miR-2045star	NVE8594	10240	10261	10251	1	1	0	No	UACGCAGAGACUAAUCACCAUG	::: :::::: :::: :::::.	AUG-GUCUCUAAUUAAUGGUAU	5.5	18.5	11259
miR-2045star	NVE9180	1528	1549	1539	1	0	1	No	UACCGUAGAUCUAAUUACCCUA	::::. :::: :::::::: ::	AUGGUCUCUA-AUUAAUGGUAU	5.5	18.5	2129
miR-2047star	NVE26041	1706	1727	1717	1	0	1	No	CAUACGCCGAGCAGAUGCCGGA	:: ::::::::::::: ::::	UUAAGCGGCUCGUCUACAGCCU	4	19	2504
miR-2047star	NVE4953	94	116	106	1	0	1	No	AACUUGGUGGGUAGUAUGUCGGA	:: :.: .:.:.:: ::::::::	UUAAGCGGCUCGUC-UACAGCCU	6.5	18	1127
miR-2047star	NVE7608	544	565	555	1	0	1	No	GAUUCCCUGAUCAGAUGUGGGA	.:::: :.:: ::::::: :::	UUAAGCGGCUCGUCUACAGCCU	6	18	1585
miR-2050	NVE14161	6595	6617	6607	1	0	1	No	AAUAAUGGUCACAGCCAUCAUAU	::. : :.::::::: :::: ::	UUGGU-CUAGUGUCGUUAGUUUA	7	18	6841
miR-2050	NVE15226	156	176	166	1	1	0	No	UACCAGAAUACAGUGA-CAAAU	:::::: .::::..: :::::	UUGGUCUAGUGUCGUUAGUUUA	6.5	17.5	5928
miR-2050	NVE16802	950	972	962	1	0	1	No	AAUCGAGCUUACAGGAAGCAAAU	::.: :: :.:::: :: :::::	UUGG-UCUAGUGUCGUUAGUUUA	7	18	1799
miR-2050	NVE17084	1959	1981	1971	1	0	1	No	AAUCAGUAUCAUGGUAAGCAAAU	::.::: ::::..:.:: :::::	UUGGUC-UAGUGUCGUUAGUUUA	6.5	19	5554
miR-2050	NVE21998	472	493	483	1	0	1	No	AGCAAGAUUACAGAAAUUAGAU	:.: ::::.:::: :::.:.::	UUGGUCUAGUGUCGUUAGUUUA	6	18	2333
miR-2050	NVE22017	1037	1059	1049	1	1	0	No	AAUUCGAUUCAUAUCAAUUAAAU	::.. :: :::.: ::::.::::	UUGGUCU-AGUGUCGUUAGUUUA	7	18	1402
miR-2050	NVE24690	532	554	544	1	0	1	No	AAGCAGAUUAUACGUAAUCGAAU	:: :::::.:.: :.::::.:::	UUGGUCUAGUGU-CGUUAGUUUA	6.5	19	993
miR-2050	NVE25230	1093	1115	1105	1	0	1	No	AACUACAUCACAGCAAACACAA	:::.: :::::::::: :: :	UUGGUCUAGUGUCGUUAGUUUA	6.5	17.5	1261
miR-2050	NVE7495	149	171	161	1	0	1	No	AAUCGAAGCAACAGUGAUUAAAU	::.:. : : ::::..::.::::	UUGGUCUAG-UGUCGUUAGUUUA	7	17.5	1119
miR-2050	NVE8977	1621	1642	1632	1	1	0	No	GAAUAGAUGAUAGUAAUCAAGU	.: .:::: :.::.::::::.:	UUGGUCUAGUGUCGUUAGUUUA	6	17.5	1762
miR-2051	NVE10221	5133	5154	5144	1	1	0	No	GCCACUGACAAAGACUUUGGUG	: ::: :: :::::::..:::.	CUGUGUCU-UUUCUGAGGCCAU	5.5	17.5	9114
miR-2051	NVE15807	1838	1860	1850	1	0	1	No	GACAAAGAAAGGUAUUCUGGUU	:::: :::::.: :.::.:::	CUGUGUCUUUUC-UGAGGCCAU	7	17.5	2034
miR-2051	NVE17692	2232	2253	2243	1	0	1	No	GAGACAGAAAAGACUAUCUGUG	:: :::::::::::: .: ::.	CUGUGUCUUUUCUGA-GGCCAU	6.5	18	2887
miR-2051	NVE22442	562	581	571	1	0	1	No	GACGCGGAAAAGAC-CCAGUG	:::.:.:::::::: :: ::.	CUGUGUCUUUUCUGAGGCCAU	5.5	17.5	1022
miR-2051	NVE22591	28843	28864	28854	1	1	0	No	GGCAAAUGGAAAGGCUUUGGUA	:.:: : :.::::.::..::::	CUGUGU-CUUUUCUGAGGCCAU	6	17.5	30142
miR-2051	NVE4282	4177	4198	4188	1	1	0	No	GAUAUAGAUAAAGCCUGUGGUA	::.:.::: :::: :: .::::	CUGUGUCU-UUUCUGAGGCCAU	7	17.5	4242
miR-2051	NVE6226	1740	1761	1751	1	1	0	No	GUCACAGAUAAAGACUCUAGCA	: :::::: ::::::::. : :	CUGUGUCU-UUUCUGAGGCCAU	7	17.5	4314
miR-2051star	NVE16373	908	930	920	1	0	1	No	AAAAACGAAAGAUUUUUUAUUA	:::: :: ::: ::::.::::	UUUUGGCCUUCGAAAAGAUAAA	6	17.5	1151
miR-2043bstar	NVE10249	2190	2211	2201	1	0	1	No	CGUAUCCCGUCUUUUGAAGGCG	: :: ::::::::::: :::.	GAUUAUGGCAGAAAACUCCCGU	5.5	17.5	2429
miR-2043bstar	NVE4826	1406	1426	1416	1	1	0	No	UUAAGA-UGUUAUUUGAGGGCA	.::: : .::. ::::::::::	GAUUAUGGCAGAAAACUCCCGU	6	17.5	3083
