# Supplementary material for: Cnidarian microRNAs frequently regulate targets by cleavage
Source: HighWire-hosted journal article supplement (doi:10.1101/gr.162503.113), 2014-03-18
Supplement: Table_S4.xlsx [file Table_S4.xlsx]

## Sheet: RLM-RACE supported cleavage
Nematostella vectensis
miRNA	Target gene	Genomic coordinates of miRNA site	Primer for RT	Outer PCR primer	Inner PCR Primer	# clones positive / total	cleavage site transcript region	Remarks
miR-2022	NVE18870/NR2	scaffold_499: 72404-72425	CAAGACCTAACGTCGTCAGAAC	CGTCATAATGGTAGCACCTGACGTCATG	AATGACCTGCGCGAAGCTCCGTTCGCT	9 of 10	CDS
miR-2022	NVE16498	scaffold_171:181267-181286	CAAGAACTGGGTGTGGTCACA	GCTCAGGTGTTGTGAATGGTTCTGGTG	AACAGGTTCTGGGGTCGTAAATGGTTC	7 of 8	CDS
miR-2022	NVE26059	scaffold_98: 36387-36408	TTCTGAATTCGTCCATGA	CTGAATTCGTCCATGATGTAAACAGTGC	GTAAACAGTGCAATAACGCATAAGGTC	10 of 10	5' UTR
miR-2024a/g/f	NVE11132*	scaffold_257: 262069-262088	GTACGTATTACCGATGTTGCT	TCCACGCTCTTCCCCGAACTTCTCGT	AACGCATGTTTGTAGTTCACCATGGCT	7 of 8	3' UTR	The miR-2024 family targets a family of highly similar genes with multiple binding sites for miR-2024
miR-2025	NVE12346/Six3	scaffold_286:145620-145641	TTCTCCTTCTATCGCCCTGTT	TCGTCTCTTAGTTCTAACAAGGCGGA	AAGTCAGGGCCGCTGCTCGGAGAGTT	6 of 8	CDS
miR-2025	NVE8472	scaffold_201:263493-263512	GTATTACTTGCTCCATGCTC	CGTCCTGGGACTGTACTGCATTGGCAA	CGGTCTGGTTTTTCAGGTCGAGAAGCT	5 of 8	CDS	NVE847 ecodes a protein with moderate similarity to vertebrate neuopilin
miR-2026	NVE21156/HoxD isoform 1	scaffold_61: 677442-677462	CTAGACTAGACTTATTCCTAG	TATGTTACACCCCTAGTCCTCGATAG	AGCCTGCTTTATGTATGAGAAATGTG	7 of 7	3' UTR
miR-2026	NVE21279/HoxD isoform 3	scaffold_61: 681906-681926	ATTCTATAACAATAGAACCACT	AATGTACGTGTTGAATTCGCGCCAAG	GCCAAGCGTTGCGCTAAAATTGGACT	3 of 4	3' UTR
miR-2028	NVE20913	scaffold_6:333111-333131	TAACAACTTCCGTTACACAG	CGGAACTTCCGGAACAATGTCCCTGT	CAAAATCCTCCACTGCTTCACATCCT	2 of 6	CDS	4 of 6 clones are shorter than expected, suggesting possible degradation after cleavage
miR-2029	NVE6251/vasa2	scaffold_17: 1521160-1521178	GATTGTACAGTAATTTCAACC	CAGGGTCTAAACCACCACACAACTGTC	CACTTATGTCTTCATCAGTACAAGCCA	9 of 10	3' UTR
miR-2030	NVE19315	scaffold_507: 91565-91586	CGACTGTGGTGGGCTGGTACAGGTTCA	GACTTTTGCGAGAAGCAGCTGACCAGGT	CTTCGCGCTCGCAGCATAGTGAAACAC	3 of 6	CDS
miR-9414	NVE17823	scaffold_45: 200459-200478	TCTGTCCTCCCTTGGCATCACT	CGGCAAGTTCTGCATTCTCTGGCTCT	CTTAAGCTGTCCGCCCTGAACATCTGCA	6 of 6	CDS
miR-9426	NVE947	scaffold_106: 163363- 163384	CATGTGCTACAATGAGCGTGA	ATACAACTTGCGATCATTCGAGCAAC	GCAACATCTACTGCGATAAATAACCG	1 of 4	5' UTR	3 of 4 clones are shorter than expected, suggesting possible degradation after cleavage
Hydra magnipapillata
miRNA	Target EST ID (GenBank)	Locus ID (GenBank)	Primer for RT	Outer PCR primer	Inner PCR Primer	# clones positive / total	cleavage site transcript region
miR-3007	DT620516	XM_002155073	ATCTTCACAACAAGATCCCTCA	TGGCGAATGTCTGAACGAACTATTGC	CGAGTTATTGCACCAACACAAGTTACTC	7 of 8	CDS
miR-3012a	CV659710	XM_002159575	TGACATATTAGTTGTAGGTAC	CTGACAGCTGCTCTATCACTAAGCAT	CCGATGAACCAGTGAAAGATGGTAGGT	6 of 7	CDS
